# Supplementary material for: Comparison of Treatments for Cocaine Use Disorder Among Adults: A Systematic Review and Meta-analysis
Source: PubMed Central journal article supplement (PMC8105751; doi:10.1001/jamanetworkopen.2021.8049), 2021-05-07
Supplement: jamanetwopen-e218049-s001.pdf [file jamanetwopen-e218049-s001.pdf]

## Supplementary Online Content

Bentzley BS, Han SS, Neuner S, Humphreys K, Kampman KM, Halpern CH. Comparison of treatments for cocaine use disorder among adults: a systematic review and meta-analysis. *JAMA Netw Open*. 2021;4(5):e218049. doi:10.1001/jamanetworkopen.2021.8049

**eMethods 1.** Study Protocol

**eMethods 2.** R Scripts With Associated Output

**eMethods 3.** Model Outputs in Data Sets (Subsetted by Treatment Category)

**eFigure 1.** Forest Plot Without Imputed Data: Anticonvulsants

**eFigure 2.** Forest Plot Without Imputed Data: Antidepressants

**eFigure 3.** Forest Plot Without Imputed Data: Antipsychotics

**eFigure 4.** Forest Plot Without Imputed Data: Contingency Management

**eFigure 5.** Forest Plot Without Imputed Data: Dopamine Agonists

**eFigure 6.** Forest Plot Without Imputed Data: Miscellaneous Medications

**eFigure 7.** Forest Plot Without Imputed Data: Opioids

**eFigure 8.** Forest Plot Without Imputed Data: Other Interventions

**eFigure 9.** Forest Plot Without Imputed Data: Placebo

**eFigure 10.** Forest Plot Without Imputed Data: Psychostimulants

**eFigure 11.** Forest Plot Without Imputed Data: Psychotherapy

**eFigure 12.** Funnel Plots (Full Models)

**eFigure 13.** Funnel Plots (By Treatment Category)

**eReferences**

This supplementary material has been provided by the authors to give readers additional information about their work.

## eMethods 1. Study Protocol

### 1) Search strategy

#### a. Database: PubMed

- 1) Query: cocaine[title] AND (Clinical Trial[ptyp] AND "loattrfull text"[sb] AND ("1995/12/31"[PDAT] : "2017/12/31"[PDAT])) AND English[lang])
  1. Title contains "cocaine"
  2. Article type: "Clinical Trial"
  3. Text availability: "Full text"
  4. Publication date: From 1995/12/31 to 2017/12/30 (20 years)
  5. Language: "English"
  6. Last search: 12/30/2015
  7. References returned = 733
- 2) Query: cocaine[title] AND (Clinical Trial[ptyp] AND "loattrfull text"[sb] AND ("1995/12/31"[PDAT] : "2016/12/31"[PDAT])) AND English[lang])
  1. Title contains "cocaine"
  2. Article type: "Clinical Trial"
  3. Text availability: "Full text"
  4. Publication date: From 1995/12/31 to 2016/12/31 (21 years)
  5. Language: "English"
  6. Last search: 05/02/2017
  7. References returned = 747
- 3) Query: cocaine[title] AND (Clinical Trial[ptyp] AND "loattrfull text"[sb] AND ("1995/12/31"[PDAT] : "2017/12/31"[PDAT])) AND English[lang])
  1. Title contains "cocaine"
  2. Article type: "Clinical Trial"
  3. Text availability: "Full text"
  4. Publication date: From 1995/12/31 to 2017/12/31 (22 years)
  5. Language: "English"
  6. Last search: 02/18/2018
  7. References returned = 775
- 4) Query: cocaine[title] AND (Clinical Trial[ptyp] AND "loattrfull text"[sb] AND ("1995/12/31"[PDAT] : "2017/12/31"[PDAT])) NOT English[lang])
  1. Title contains "cocaine"
  2. Article type: "Clinical Trial"
  3. Text availability: "Full text"
  4. Publication date: From 1995/12/31 to 2017/12/31 (22 years)
  5. Language: Anything but English
  6. Last search: 12/16/2018

5) References returned = 6

- 6) After excluding duplicates these 3 searches together yielded 808 articles, indicating some articles that were returned in the original searches were no longer included in the later searches.

#### b. References within Cochrane reviews on treatments for cocaine disorders were searched (6).

- 1) Amato L, Minozzi S, Pani PP, Davoli M. Antipsychotic medications for cocaine dependence. Amato L, editor. Cochrane Database Syst Rev. Chichester, UK: John Wiley & Sons, Ltd; 2007;(3):CD006306.
  1. All references were included with the Pubmed search.
- 2) Castells X, Casas M, Pérez-Mañá C, Roncero C, Vidal X, Capellà D. Efficacy of psychostimulant drugs for cocaine dependence. Castells X, editor. Cochrane Database Syst Rev. Chichester, UK: John Wiley & Sons, Ltd; 2010;(2):CD007380.
  1. Margolin A, Avants K, Malison RT, Kosten TR. High- and low-dose mazindol for cocaine dependence in methadone- maintained patients: a preliminary evaluation. Substance Abuse 1997;18:125-31.
  2. Perry EB, Gil R, Miles D, Brenner L, MacDougall L, Johnson R, et al. Mazindol augmentation of antipsychotic treatment for schizophrenic patients with

comorbid cocaine abuse or dependence: a preliminary double-blind, randomized, placebo-controlled trial. *Journal of Dual Diagnosis* 2004;1: 37-47.

- 3} Knapp WP, Soares BGO, Farrel M, Lima MS. Psychosocial interventions for cocaine and psychostimulant amphetamines related disorders. Knapp WP, editor. *Cochrane Database Syst Rev*. Chichester, UK: John Wiley & Sons, Ltd; 2007;(3):CD003023.
    1. Magura S, Rosenblum A, Lovejoy M, Handelsman L, Foote J, Stimmel B. Neurobehavioral Treatment for Cocaine-Using Methadone Patients: A Preliminary Report. *Journal of Addictive Diseases* 1994;13(4):143-60.
    2. Petry NM, Peirce JM, Stitzer ML, Blaine J, Roll JM, Cohen A, et al. Effect of prize-based incentives on outcomes in stimulant abusers in outpatient psychosocial treatment programs: a national drug abuse treatment clinical trials network study. *Archives of General Psychiatry* 2005;62(10): 1148-56.
    3. Silverman K, Svikis D, Robles E, Stitzer ML, Bigelow GE. A Reinforcement-Based Therapeutic Workplace for the Treatment of Drug Abuse. Six-Month Abstinence Outcomes. *Exp Clin Psychopharmacol*. 2001 Feb;9(1):14-23.
  - 4} Minozzi S, Cinquini M, Amato L, Davoli M, Farrell MF, Pani PP, et al. Anticonvulsants for cocaine dependence. Minozzi S, editor. *Cochrane Database Syst Rev*. Chichester, UK: John Wiley & Sons, Ltd; 2015;4:CD006754.
    1. Kampan KM, Pettinati H, Lynch KG, Dackis C, Sparkman T, Weigley C, et al. A pilot trial of topiramate for the treatment of cocaine dependence. *Drug and Alcohol Dependence* 2004;75(3):233-40.
  - 5} Minozzi S, Amato L, Pani PP, Solimini R, Vecchi S, De Crescenzo F, et al. Dopamine agonists for the treatment of cocaine dependence. Amato L, editor. *Cochrane Database Syst Rev*. Chichester, UK: John Wiley & Sons, Ltd; 2015;5:CD003352.
    1. All references were included with the Pubmed search.
  - 6} Pani PP, Trogu E, Vecchi S, Amato L. Antidepressants for cocaine dependence and problematic cocaine use. Pani PP, editor. *Cochrane Database Syst Rev*. Chichester, UK: John Wiley & Sons, Ltd; 2011;(12):CD002950.
    1. All references were included with the Pubmed search.
  - 7} Pani PP, Trogu E, Vacca R, Amato L, Vecchi S, Davoli M. Disulfiram for the treatment of cocaine dependence. Pani PP, editor. *Cochrane Database Syst Rev*. Chichester, UK: John Wiley & Sons, Ltd; 2010;(1):CD007024.
    1. All references were included with the Pubmed search.
- c. Screening references during full text review, the following references were added to abstract screening (17).
- 1} Petry NM, Alessi SM, Marx J, Austin M, Tardif M. Vouchers versus prizes: contingency management treatment of substance abusers in community settings. *J Consult Clin Psychol*. 2005 Dec;73(6):1005-14.
  - 2} Petry NM, Alessi SM, Carroll KM, Hanson T, MacKinnon S, Rounsaville B, et al. Contingency management treatments: Reinforcing abstinence versus adherence with goal-related activities. *J Consult Clin Psychol*. 2006 Jun;74(3):592-601.
  - 3} Carroll KM, Ball SA, Martino S, Nich C, Babuscio TA, Nuro KF, et al. Computer-assisted delivery of cognitive-behavioral therapy for addiction: a randomized trial of CBT4CBT. *Am J Psychiatry*. 2008 Jul;165(7):881-8. PMID: PMC2562873
  - 4} Beck T, Haasen C, Verthein U, Walcher S, Schuler C, Backmund M, et al. Maintenance treatment for opioid dependence with slow-release oral morphine: a randomized cross-over, non-inferiority study versus methadone. *Addiction*. 2014 Apr;109(4):617-26. PMID: PMC4226326
  - 5} Holtyn AF, Koffarnus MN, DeFulio A, Sigurdsson SO, Strain EC, Schwartz RP, et al. The therapeutic workplace to promote treatment engagement and drug abstinence in out-of-treatment injection drug users: a randomized controlled trial. *Prev Med*. 2014 Nov;68:62-70. PMID: PMC4155024
  - 6} Milby JB, Schumacher JE, Vuchinich RE, Freedman MJ, Kertesz S, Wallace D. Toward cost-effective initial care for substance-abusing homeless. *Journal of Substance Abuse Treatment*. 2008 Mar;34(2):180-91. PMID: PMC2764243
  - 7} Milby JB, Schumacher JE, Wallace D, Freedman MJ, Vuchinich RE. To house or not to house: the effects of providing housing to homeless substance abusers in treatment. *Am J Public Health*. 2005 Jul;95(7):1259-65. PMID: PMC1449349
  - 8} Milby JB, Schumacher JE, Raczynski JM, Caldwell E, Engle M, Michael M, et al. Sufficient conditions for effective treatment of substance abusing homeless persons. *Drug Alcohol Depend*. 1996 Dec 2;43(1-2):39-47.

- 9) Schmitz JM, Rathnayaka N, Green CE, Moeller FG, Dougherty AE, Grabowski J. Combination of Modafinil and d-amphetamine for the Treatment of Cocaine Dependence: A Preliminary Investigation. *Front Psychiatry. Frontiers*; 2012;3:77. PMID: PMC3430875
- 10) Nuijten M, Blanken P, Van den Brink W, Hendriks V. Modafinil in the treatment of crack-cocaine dependence in the Netherlands: Results of an open-label randomised controlled feasibility trial. *J. Psychopharmacol. (Oxford)*. 2015 Jun;29(6):678-87.
- 11) Mannelli P, Patkar AA, Murray HW, Certa K, Peindl K, Mattila-Evenden M, et al. Polymorphism in the serotonin transporter gene and response to treatment in African American cocaine and alcohol-abusing individuals. *Addict Biol*. 2005 Sep;10(3):261-8.
- 12) Wechsberg WM, Lam WKK, Zule WA, Bobashev G. Efficacy of a woman-focused intervention to reduce HIV risk and increase self-sufficiency among African American crack abusers. *Am J Public Health*. 2004 Jul;94(7):1165-73. PMID: PMC1448416
- 13) Donovan DM, Daley DC, Brigham GS, Hodgkins CC, Perl HI, Garrett SB, et al. Stimulant abuser groups to engage in 12-step: a multisite trial in the National Institute on Drug Abuse Clinical Trials Network. *Journal of Substance Abuse Treatment. Elsevier*; 2013 Jan;44(1):103-14. PMID: PMC3434261
- 14) Winhusen TM, Brigham GS, Kropp F, Lindblad R, Gardin JG, Penn P, et al. A randomized trial of concurrent smoking-cessation and substance use disorder treatment in stimulant-dependent smokers. *J Clin Psychiatry*. 2014 Apr;75(4):336-43. PMID: PMC4019678
- 15) Gottheil E, Thornton C, Weinstein S. Effectiveness of high versus low structure individual counseling for substance abuse. *Am J Addict*. 2002;11(4):279-90.
- 16) Thornton CC, Gottheil E, Weinstein SP, Kerachsky RS. Patient-treatment matching in substance abuse. Drug addiction severity. *Journal of Substance Abuse Treatment*. 1998 Nov;15(6):505-11.
- 17) Brown ES, Todd JP, Hu LT, Schmitz JM, Carmody TJ, Nakamura A, et al. A Randomized, Double-Blind, Placebo-Controlled Trial of Citalopram for Cocaine Dependence in Bipolar I Disorder. *Am J Psychiatry*. 2015 Oct;172(10):1014-21.

## 2) Abstract screening

- a. Performed using Covidence.org
- b. Total abstracts screened: 831 = 808 from 4 serial Pubmed searches +6 Cochrane references +17 references from references.
  - 1) Inclusion criteria
    1. Human subjects
    2. Testing a treatment for cocaine use disorder
    3. If uncertain, include in full text screening.
- c. Total articles identified for full text screening: 305

## 3) Full text screening

- a. Performed using Covidence.org
- b. Inclusion criteria
  - 1) Population
    1. Meets criteria for cocaine use disorder (DSM-V), cocaine dependence (DSM-IV or -III), cocaine abuse (DSM-IV or -III), or cocaine use.
    2. Age: ≥18 years.
  - 2) Number of participants: ≥1
  - 3) Outcome measures
    1. Duration of treatment is defined
    2. Intention-to-treat (ITT) proportion abstinent from cocaine based on urinalysis at the end of the treatment period is defined.
      - a. Directly reported
      - b. Indirectly reported by reporting proportion abstinent (or proportion urine drug screens negative) from cocaine based on urinalysis at the end of the treatment (non-ITT) as well as number of subjects retained in the study at that time.
    3. Mean intention-to-treat (ITT) proportion urine drug screens negative from cocaine during the treatment period.

- a. Directly reported
    - b. Indirectly reported by reporting proportion urine drug screens negative from cocaine across the treatment period as well as number of subjects retained in the study at the end of treatment.
  - c. Exclusion criteria
    - 1) >25% subjects are not cocaine users
    - 2) Maintenance study: >80% of subjects test negative at study start.
    - 3) Secondary analysis of a study already included.
    - 4) Reporting only pooled urinalysis results, i.e. proportion negative from multiple drugs without reporting the specific proportion negative for cocaine.
  - d. Excluded studies base on full text review: 147
    - 1) 99 Did not report proportion coke-free (mean or at study endpoint)
    - 2) 14 Secondary analysis of a study that is already included
    - 3) 13 Maintenance study, all participants were initially coke-free
    - 4) 9 Does not report number of completers
    - 5) 2 Does not report N of each group.
    - 6) 2 Large portion of participants not cocaine users
    - 7) 2 Not a study of cocaine use disorders.
    - 8) 2 Pooled urinalysis results only
    - 9) 2 Duplicate
    - 10) 1 Inpatient study
    - 11) 1 Study protocol
    - 12) 1 Study found after search close
  - e. Studies included in review: 157
- 4) Data extraction
- a. Data were recorded in an Excel spread sheet.
  - b. If data were only available in graph form, then Adobe Illustrator was used to measure values directly from graphs.
  - c. Data from 402 treatment groups were extracted
  - d. Opioid use disorders
    - 1) Treatment groups were categorically coded as having concomitant opioid use disorder if the study reported that the majority >50% of participants were active opioid users; reported a recent diagnosis of opioid abuse, dependence or use disorder; or reported that participants were enrolled in an opioid substitution program.
    - 2) Similarly, if >50% of participants in a treatment group were on methadone or buprenorphine then the treatment group was categorically coded as being treated with an opioid.

## eMethods 2. R Scripts With Associated Output

### \*\*\*Calculate primary outcomes and variance\*\*\*

\*\*\*R script:

```
#Author: Brandon S Bentzley
#Project: Meta analysis of treatments for cocaine use disorders
#Date this R script was created: 2/20/2017
#Date this R script was last updated: 3/26/2018
#Description: This script uses escalc from the package metafor to calculate the log odds ratio (yi)
#and the variances (vi) for use in metaregression in a different script

# store the current directory
initial.dir<-getwd()
# change to the new directory
setwd("/Users/bsbentzley/Documents/Stanford/Malenka/2015.12.03 - DBS cocaine/Ranalysis")
# load the necessary libraries
library(gdata)
library(metafor)
# set the output file
sink("Output.out")
# load the dataset
mydata = read.csv("data.csv")

#Do analysis
#CFE: number of participants cocaine free at end of trial
#CPE: number of participants cocaine positive at end of trial
#CFS: number of participants cocaine free at start of trial
#CPS: number of participants cocaine positive at start of trial

mydata <- escalc(measure = "OR", ai = CFE, bi = CPE, ci = CFS, di = CPS, data = mydata, add = 1, to
= "only0", append = TRUE)
write.csv(mydata, file = "Calculate_yi_vi.csv")

# close the output file
sink()
# unload the libraries
detach("package:gdata")
detach("package:metafor")
# change back to the original directory
setwd(initial.dir)
```

\*\*\*Output:

None, log odds ratios (yi) and variance (vi) output to main data table (data.xls) included in online materials.

### \*\*\*Fixed-effects model without covariates \*\*\*

\*\*\*R script:

```
#Author: Brandon S Bentzley
#Project: Meta-analysis of treatments for cocaine use disorders
#Date this R script was created: 2/20/2017
#Date this R script was last updated: 04/06/2018
#Description: This script uses rma() from the package metafor to calculate fixed effects with no
moderators

# store the current directory
initial.dir<-getwd()
# change to the new directory
setwd("/Users/bsbentzley/Documents/Stanford/Malenka/2015.12.03 - DBS cocaine/Ranalysis")
# load the necessary libraries
library(gdata)
library(metafor)
# set the output file
sink("Output.out")
# load the dataset
mydata = read.csv("data.csv", colClasses=c(
"Author"="character", "Year"="numeric", "Title"="character", "StudyID"="factor",
"Double_Blind"="factor", "Multisite"="factor", "Randomized"="factor", "SubDsrdr"="character",
"Placebo"="factor", "Psychotherapy"="factor", "ContingencyManagement"="factor", "Other"="factor",
"Opioid"="factor", "MiscMeds"="factor", "Psychostimulants"="factor", "Anticonvulsants"="factor",
"DopamineAgonists"="factor", "Antidepressants"="factor", "Antipsychotics"="factor",
"TreatmentNmbr"= "numeric", "TrtmntlorMore"="factor", "N_start"="numeric",
"Proportion_Male"="numeric", "Mean_Age"="numeric", "Mean_daysweek"="numeric",
"Proportion_30days"="numeric", "Years_use"="numeric", "ASI_Drug"="numeric",
"TestPosScreen"="factor", "CokeFreeBase"="numeric", "CokeFreeWkl"="numeric",
"BaselineType"="factor", "CokeFreeStart"="numeric", "Complication"="character", "FU"="numeric",
"Complete"="numeric", "CokeFreeLastWk_NotITT"="numeric", "CokeFreeMean_NotITT"="numeric",
"CokeFreeLastWk_ITT"="numeric", "CokeFreeMean_ITT"="numeric", "CokeFreeOutcome_Type"="factor",
"CokeFreeOutcome_ITT"="numeric", "CFS"="numeric", "CPS"="numeric", "CFE"="numeric",
"CPE"="numeric", "yi"="numeric", "vi"="numeric"))

#Do analysis
results<-rma(yi, vi, data = mydata, method = "FE", measure = "OR")
print(results)

# close the output file
sink()
# unload the libraries
detach("package:gdata")
detach("package:metafor")
# change back to the original directory
setwd(initial.dir)
```

\*\*\*Output:

Fixed-Effects Model (k = 314)

Test for Heterogeneity:

Q(df = 313) = 1337.9201, p-val < .0001

Model Results:

| estimate | se     | zval   | pval   | ci.lb   | ci.ub  |
|----------|--------|--------|--------|---------|--------|
| 0.0580   | 0.0366 | 1.5854 | 0.1129 | -0.0137 | 0.1297 |

---

Signif. codes: 0 '\*\*\*' 0.001 '\*\*' 0.01 '\*' 0.05 '.' 0.1 ' ' 1

**\*\*\*Random-effects model, single-level, without covariates \*\*\***

\*\*\*R script:

```
#Author: Brandon S Bentzley
#Project: Meta-analysis of treatments for cocaine use disorders
#Date this R script was created: 2/20/2017
#Date this R script was last updated: 04/03/2018
#Description: This script uses rma() from the package metafor to calculate 1-level random effects
with no moderators. It also performs a "leavelout" analysis in which it reruns the model leaving
out 1 treatment group at a time. Metafor only allows for this with no moderators.
```

```
# store the current directory
initial.dir<-getwd()
# change to the new directory
setwd("/Users/bsbentzley/Documents/Stanford/Malenka/2015.12.03 - DBS cocaine/Ranalysis")
# load the necessary libraries
library(gdata)
library(metafor)
# set the output file
sink("Output.out")
# load the dataset
mydata = read.csv("data.csv", colClasses=c(
"Author"="character", "Year"="numeric", "Title"="character", "StudyID"="factor",
"Double_Blind"="factor", "Multisite"="factor", "Randomized"="factor", "SubDsrdr"="character",
"Placebo"="factor", "Psychotherapy"="factor", "ContingencyManagement"="factor", "Other"="factor",
"Opioid"="factor", "MiscMeds"="factor", "Psychostimulants"="factor", "Anticonvulsants"="factor",
"DopamineAgonists"="factor", "Antidepressants"="factor", "Antipsychotics"="factor",
"TreatmentNmbr"= "numeric", "TrtmntlorMore"="factor", "N_start"="numeric",
"Proportion_Male"="numeric", "Mean_Age"="numeric", "Mean_daysweek"="numeric",
"Proportion_30days"="numeric", "Years_use"="numeric", "ASI_Drug"="numeric",
"TestPosScreen"="factor", "CokeFreeBase"="numeric", "CokeFreeWk1"="numeric",
"BaselineType"="factor", "CokeFreeStart"="numeric", "Complication"="character", "FU"="numeric",
"Complete"="numeric", "CokeFreeLastWk_NotITT"="numeric", "CokeFreeMean_NotITT"="numeric",
"CokeFreeLastWk_ITT"="numeric", "CokeFreeMean_ITT"="numeric", "CokeFreeOutcome_Type"="factor",
"CokeFreeOutcome_ITT"="numeric", "CFS"="numeric", "CPS"="numeric", "CFE"="numeric",
"CPE"="numeric", "yi"="numeric", "vi"="numeric"))
```

```
#Do analysis
results<-rma(yi, vi, data = mydata, method = "REML", measure = "OR")
print(results)
```

```
#Leave 1 out analysis
resLeaveout<-leavelout(results)
print(resLeaveout)
resLeaveoutexp<-leavelout(results, transf=exp)
print(resLeaveoutexp)
```

```
# close the output file
sink()
# unload the libraries
detach("package:gdata")
detach("package:metafor")
# change back to the original directory
setwd(initial.dir)
```

\*\*\*Output:

```
Random-Effects Model (k = 314; tau^2 estimator: REML)

tau^2 (estimated amount of total heterogeneity): 1.7965 (SE = 0.1969)
tau (square root of estimated tau^2 value):      1.3403
I^2 (total heterogeneity / total variability):   80.96%
H^2 (total variability / sampling variability):  5.25
```



Test for Heterogeneity:  
Q(df = 313) = 1337.9201, p-val < .0001

Model Results:

| estimate | se     | zval   | pval   | ci.lb  | ci.ub  |     |
|----------|--------|--------|--------|--------|--------|-----|
| 0.5045   | 0.0893 | 5.6487 | <.0001 | 0.3295 | 0.6796 | *** |

---  
Signif. codes: 0 '\*\*\*' 0.001 '\*\*' 0.01 '\*' 0.05 '.' 0.1 ' ' 1

Leave 1 out sensitivity analysis:

|    | estimate | se     | zval   | pval   | ci.lb  | ci.ub  | Q         | Qp     | tau2   | I2      | H2     |
|----|----------|--------|--------|--------|--------|--------|-----------|--------|--------|---------|--------|
| 3  | 0.5013   | 0.0895 | 5.6038 | 0.0000 | 0.3260 | 0.6766 | 1335.7488 | 0.0000 | 1.7980 | 81.0113 | 5.2663 |
| 4  | 0.5011   | 0.0895 | 5.5973 | 0.0000 | 0.3256 | 0.6765 | 1334.3671 | 0.0000 | 1.7995 | 81.0077 | 5.2653 |
| 5  | 0.4984   | 0.0893 | 5.5789 | 0.0000 | 0.3233 | 0.6734 | 1332.0826 | 0.0000 | 1.7905 | 80.9421 | 5.2472 |
| 6  | 0.5024   | 0.0896 | 5.6098 | 0.0000 | 0.3269 | 0.6780 | 1335.9597 | 0.0000 | 1.8022 | 81.0326 | 5.2722 |
| 9  | 0.5014   | 0.0895 | 5.6037 | 0.0000 | 0.3261 | 0.6768 | 1335.6687 | 0.0000 | 1.7990 | 81.0164 | 5.2677 |
| 10 | 0.4935   | 0.0889 | 5.5476 | 0.0000 | 0.3191 | 0.6678 | 1324.0834 | 0.0000 | 1.7699 | 80.7628 | 5.1983 |
| 11 | 0.5052   | 0.0896 | 5.6379 | 0.0000 | 0.3295 | 0.6808 | 1337.7523 | 0.0000 | 1.8044 | 81.0561 | 5.2787 |
| 12 | 0.4930   | 0.0889 | 5.5447 | 0.0000 | 0.3188 | 0.6673 | 1322.6350 | 0.0000 | 1.7681 | 80.7444 | 5.1933 |
| 13 | 0.4912   | 0.0887 | 5.5351 | 0.0000 | 0.3173 | 0.6651 | 1318.8276 | 0.0000 | 1.7585 | 80.6597 | 5.1705 |
| 14 | 0.5009   | 0.0895 | 5.5991 | 0.0000 | 0.3256 | 0.6763 | 1335.1364 | 0.0000 | 1.7980 | 81.0068 | 5.2650 |
| 15 | 0.4960   | 0.0892 | 5.5628 | 0.0000 | 0.3213 | 0.6708 | 1328.4176 | 0.0000 | 1.7818 | 80.8659 | 5.2263 |
| 16 | 0.4990   | 0.0894 | 5.5840 | 0.0000 | 0.3239 | 0.6742 | 1333.0336 | 0.0000 | 1.7924 | 80.9602 | 5.2522 |
| 17 | 0.4972   | 0.0893 | 5.5705 | 0.0000 | 0.3223 | 0.6722 | 1330.2591 | 0.0000 | 1.7865 | 80.9065 | 5.2374 |
| 18 | 0.4966   | 0.0892 | 5.5664 | 0.0000 | 0.3217 | 0.6715 | 1329.2950 | 0.0000 | 1.7841 | 80.8858 | 5.2317 |
| 19 | 0.5124   | 0.0892 | 5.7418 | 0.0000 | 0.3375 | 0.6872 | 1330.5937 | 0.0000 | 1.7837 | 80.8665 | 5.2264 |
| 32 | 0.5090   | 0.0896 | 5.6836 | 0.0000 | 0.3335 | 0.6846 | 1336.7272 | 0.0000 | 1.8010 | 81.0079 | 5.2653 |
| 33 | 0.5112   | 0.0894 | 5.7190 | 0.0000 | 0.3360 | 0.6864 | 1332.9231 | 0.0000 | 1.7918 | 80.9259 | 5.2427 |
| 34 | 0.5083   | 0.0896 | 5.6735 | 0.0000 | 0.3327 | 0.6839 | 1337.3337 | 0.0000 | 1.8029 | 81.0227 | 5.2695 |
| 36 | 0.5127   | 0.0892 | 5.7475 | 0.0000 | 0.3378 | 0.6875 | 1329.3107 | 0.0000 | 1.7815 | 80.8442 | 5.2204 |
| 37 | 0.5115   | 0.0894 | 5.7234 | 0.0000 | 0.3363 | 0.6866 | 1332.6471 | 0.0000 | 1.7903 | 80.9176 | 5.2404 |
| 38 | 0.5063   | 0.0897 | 5.6465 | 0.0000 | 0.3306 | 0.6821 | 1337.8812 | 0.0000 | 1.8063 | 81.0352 | 5.2729 |
| 39 | 0.5060   | 0.0897 | 5.6419 | 0.0000 | 0.3302 | 0.6818 | 1337.7455 | 0.0000 | 1.8067 | 81.0244 | 5.2699 |
| 40 | 0.5036   | 0.0897 | 5.6165 | 0.0000 | 0.3279 | 0.6793 | 1335.4430 | 0.0000 | 1.8056 | 81.0136 | 5.2669 |
| 41 | 0.4957   | 0.0891 | 5.5604 | 0.0000 | 0.3210 | 0.6704 | 1327.7301 | 0.0000 | 1.7803 | 80.8524 | 5.2226 |
| 42 | 0.4983   | 0.0893 | 5.5779 | 0.0000 | 0.3232 | 0.6734 | 1331.8161 | 0.0000 | 1.7903 | 80.9395 | 5.2465 |
| 43 | 0.5030   | 0.0895 | 5.6188 | 0.0000 | 0.3275 | 0.6784 | 1336.9600 | 0.0000 | 1.8013 | 81.0389 | 5.2740 |
| 44 | 0.4961   | 0.0893 | 5.5558 | 0.0000 | 0.3211 | 0.6711 | 1299.9203 | 0.0000 | 1.7846 | 80.7657 | 5.1990 |
| 45 | 0.5002   | 0.0894 | 5.5935 | 0.0000 | 0.3249 | 0.6754 | 1334.4845 | 0.0000 | 1.7958 | 80.9898 | 5.2603 |
| 46 | 0.5034   | 0.0896 | 5.6185 | 0.0000 | 0.3278 | 0.6790 | 1336.6914 | 0.0000 | 1.8038 | 81.0440 | 5.2754 |
| 47 | 0.5011   | 0.0895 | 5.6010 | 0.0000 | 0.3257 | 0.6764 | 1335.4044 | 0.0000 | 1.7980 | 81.0093 | 5.2657 |
| 48 | 0.5031   | 0.0895 | 5.6194 | 0.0000 | 0.3276 | 0.6785 | 1336.9947 | 0.0000 | 1.8015 | 81.0401 | 5.2743 |
| 49 | 0.5011   | 0.0895 | 5.6010 | 0.0000 | 0.3257 | 0.6764 | 1335.4044 | 0.0000 | 1.7980 | 81.0093 | 5.2657 |
| 50 | 0.5030   | 0.0895 | 5.6191 | 0.0000 | 0.3276 | 0.6785 | 1336.9797 | 0.0000 | 1.8014 | 81.0396 | 5.2741 |
| 51 | 0.5020   | 0.0895 | 5.6092 | 0.0000 | 0.3266 | 0.6774 | 1336.2206 | 0.0000 | 1.7999 | 81.0255 | 5.2702 |
| 54 | 0.4989   | 0.0894 | 5.5826 | 0.0000 | 0.3238 | 0.6741 | 1332.6627 | 0.0000 | 1.7925 | 80.9582 | 5.2516 |
| 55 | 0.4977   | 0.0893 | 5.5737 | 0.0000 | 0.3227 | 0.6727 | 1330.9265 | 0.0000 | 1.7884 | 80.9222 | 5.2417 |
| 56 | 0.4995   | 0.0895 | 5.5828 | 0.0000 | 0.3241 | 0.6749 | 1330.2809 | 0.0000 | 1.7961 | 80.9619 | 5.2526 |
| 57 | 0.5016   | 0.0896 | 5.5984 | 0.0000 | 0.3260 | 0.6772 | 1332.5431 | 0.0000 | 1.8020 | 80.9939 | 5.2615 |
| 58 | 0.5027   | 0.0896 | 5.6119 | 0.0000 | 0.3271 | 0.6783 | 1336.1227 | 0.0000 | 1.8028 | 81.0358 | 5.2731 |
| 59 | 0.5055   | 0.0897 | 5.6379 | 0.0000 | 0.3298 | 0.6813 | 1337.6469 | 0.0000 | 1.8063 | 81.0417 | 5.2747 |
| 60 | 0.5067   | 0.0896 | 5.6535 | 0.0000 | 0.3310 | 0.6824 | 1337.9142 | 0.0000 | 1.8050 | 81.0479 | 5.2765 |
| 61 | 0.5067   | 0.0896 | 5.6535 | 0.0000 | 0.3310 | 0.6824 | 1337.9142 | 0.0000 | 1.8050 | 81.0478 | 5.2764 |
| 62 | 0.5028   | 0.0896 | 5.6088 | 0.0000 | 0.3271 | 0.6785 | 1333.9696 | 0.0000 | 1.8046 | 81.0004 | 5.2633 |
| 63 | 0.5037   | 0.0897 | 5.6181 | 0.0000 | 0.3280 | 0.6795 | 1335.8333 | 0.0000 | 1.8057 | 81.0210 | 5.2690 |
| 64 | 0.5032   | 0.0897 | 5.6124 | 0.0000 | 0.3275 | 0.6789 | 1334.6920 | 0.0000 | 1.8052 | 81.0065 | 5.2650 |
| 65 | 0.5033   | 0.0897 | 5.6137 | 0.0000 | 0.3276 | 0.6790 | 1335.1696 | 0.0000 | 1.8051 | 81.0152 | 5.2674 |
| 66 | 0.4978   | 0.0893 | 5.5743 | 0.0000 | 0.3227 | 0.6728 | 1331.0936 | 0.0000 | 1.7885 | 80.9237 | 5.2421 |
| 67 | 0.4972   | 0.0893 | 5.5701 | 0.0000 | 0.3222 | 0.6721 | 1330.1727 | 0.0000 | 1.7862 | 80.9044 | 5.2368 |
| 68 | 0.4974   | 0.0893 | 5.5718 | 0.0000 | 0.3224 | 0.6724 | 1330.5647 | 0.0000 | 1.7872 | 80.9125 | 5.2390 |
| 69 | 0.4965   | 0.0892 | 5.5659 | 0.0000 | 0.3217 | 0.6714 | 1329.1835 | 0.0000 | 1.7838 | 80.8831 | 5.2310 |
| 70 | 0.5031   | 0.0896 | 5.6133 | 0.0000 | 0.3274 | 0.6788 | 1335.7314 | 0.0000 | 1.8044 | 81.0299 | 5.2715 |
| 71 | 0.5033   | 0.0896 | 5.6147 | 0.0000 | 0.3276 | 0.6789 | 1335.8413 | 0.0000 | 1.8046 | 81.0303 | 5.2716 |
| 80 | 0.5014   | 0.0895 | 5.6051 | 0.0000 | 0.3261 | 0.6768 | 1335.8651 | 0.0000 | 1.7984 | 81.0149 | 5.2673 |

|     |        |        |        |        |        |        |           |        |        |         |        |
|-----|--------|--------|--------|--------|--------|--------|-----------|--------|--------|---------|--------|
| 81  | 0.5037 | 0.0896 | 5.6229 | 0.0000 | 0.3281 | 0.6792 | 1337.1364 | 0.0000 | 1.8032 | 81.0481 | 5.2765 |
| 82  | 0.5032 | 0.0895 | 5.6205 | 0.0000 | 0.3277 | 0.6787 | 1337.0595 | 0.0000 | 1.8018 | 81.0422 | 5.2749 |
| 83  | 0.5043 | 0.0895 | 5.6325 | 0.0000 | 0.3288 | 0.6798 | 1337.6271 | 0.0000 | 1.8025 | 81.0498 | 5.2770 |
| 84  | 0.5008 | 0.0895 | 5.5982 | 0.0000 | 0.3255 | 0.6762 | 1335.0349 | 0.0000 | 1.7976 | 81.0042 | 5.2643 |
| 85  | 0.5013 | 0.0895 | 5.6024 | 0.0000 | 0.3259 | 0.6766 | 1335.5393 | 0.0000 | 1.7985 | 81.0129 | 5.2667 |
| 86  | 0.5096 | 0.0895 | 5.6923 | 0.0000 | 0.3341 | 0.6851 | 1336.0694 | 0.0000 | 1.7991 | 80.9927 | 5.2611 |
| 87  | 0.5081 | 0.0896 | 5.6685 | 0.0000 | 0.3324 | 0.6838 | 1337.4777 | 0.0000 | 1.8042 | 81.0129 | 5.2667 |
| 88  | 0.5061 | 0.0897 | 5.6428 | 0.0000 | 0.3303 | 0.6819 | 1337.7668 | 0.0000 | 1.8068 | 81.0189 | 5.2684 |
| 89  | 0.5033 | 0.0895 | 5.6257 | 0.0000 | 0.3279 | 0.6786 | 1337.3317 | 0.0000 | 1.7998 | 81.0327 | 5.2722 |
| 90  | 0.5043 | 0.0896 | 5.6258 | 0.0000 | 0.3286 | 0.6800 | 1337.0508 | 0.0000 | 1.8054 | 81.0454 | 5.2758 |
| 91  | 0.5066 | 0.0896 | 5.6531 | 0.0000 | 0.3309 | 0.6822 | 1337.9156 | 0.0000 | 1.8045 | 81.0519 | 5.2776 |
| 92  | 0.5031 | 0.0896 | 5.6147 | 0.0000 | 0.3275 | 0.6787 | 1336.2183 | 0.0000 | 1.8038 | 81.0379 | 5.2737 |
| 93  | 0.5076 | 0.0896 | 5.6645 | 0.0000 | 0.3320 | 0.6832 | 1337.7201 | 0.0000 | 1.8040 | 81.0374 | 5.2735 |
| 94  | 0.5067 | 0.0896 | 5.6534 | 0.0000 | 0.3310 | 0.6824 | 1337.9145 | 0.0000 | 1.8049 | 81.0487 | 5.2767 |
| 95  | 0.5067 | 0.0896 | 5.6534 | 0.0000 | 0.3310 | 0.6824 | 1337.9145 | 0.0000 | 1.8049 | 81.0487 | 5.2767 |
| 98  | 0.5127 | 0.0892 | 5.7460 | 0.0000 | 0.3378 | 0.6876 | 1325.7762 | 0.0000 | 1.7825 | 80.8200 | 5.2138 |
| 99  | 0.5132 | 0.0891 | 5.7577 | 0.0000 | 0.3385 | 0.6879 | 1325.7475 | 0.0000 | 1.7776 | 80.7964 | 5.2074 |
| 100 | 0.5068 | 0.0896 | 5.6538 | 0.0000 | 0.3311 | 0.6826 | 1337.9123 | 0.0000 | 1.8055 | 81.0400 | 5.2743 |
| 101 | 0.5081 | 0.0896 | 5.6688 | 0.0000 | 0.3324 | 0.6838 | 1337.4663 | 0.0000 | 1.8041 | 81.0136 | 5.2669 |
| 102 | 0.5125 | 0.0893 | 5.7413 | 0.0000 | 0.3375 | 0.6874 | 1328.2428 | 0.0000 | 1.7842 | 80.8478 | 5.2213 |
| 103 | 0.5082 | 0.0896 | 5.6718 | 0.0000 | 0.3326 | 0.6839 | 1337.3860 | 0.0000 | 1.8034 | 81.0209 | 5.2690 |
| 104 | 0.5086 | 0.0895 | 5.6806 | 0.0000 | 0.3331 | 0.6841 | 1337.1124 | 0.0000 | 1.8008 | 81.0228 | 5.2695 |
| 105 | 0.5094 | 0.0896 | 5.6867 | 0.0000 | 0.3338 | 0.6850 | 1335.9524 | 0.0000 | 1.8010 | 80.9774 | 5.2569 |
| 106 | 0.5122 | 0.0893 | 5.7379 | 0.0000 | 0.3373 | 0.6872 | 1330.0871 | 0.0000 | 1.7853 | 80.8696 | 5.2273 |
| 107 | 0.5082 | 0.0896 | 5.6715 | 0.0000 | 0.3326 | 0.6839 | 1337.3941 | 0.0000 | 1.8035 | 81.0201 | 5.2687 |
| 108 | 0.5099 | 0.0895 | 5.6969 | 0.0000 | 0.3344 | 0.6853 | 1335.7959 | 0.0000 | 1.7978 | 80.9868 | 5.2595 |
| 109 | 0.5128 | 0.0891 | 5.7550 | 0.0000 | 0.3381 | 0.6874 | 1330.2605 | 0.0000 | 1.7779 | 80.8327 | 5.2172 |
| 110 | 0.5098 | 0.0895 | 5.6956 | 0.0000 | 0.3344 | 0.6852 | 1335.8753 | 0.0000 | 1.7982 | 80.9886 | 5.2600 |
| 111 | 0.5129 | 0.0891 | 5.7574 | 0.0000 | 0.3383 | 0.6875 | 1329.9644 | 0.0000 | 1.7770 | 80.8245 | 5.2150 |
| 112 | 0.5098 | 0.0894 | 5.7022 | 0.0000 | 0.3346 | 0.6850 | 1335.8769 | 0.0000 | 1.7951 | 80.9852 | 5.2591 |
| 113 | 0.5103 | 0.0895 | 5.7006 | 0.0000 | 0.3349 | 0.6858 | 1333.4327 | 0.0000 | 1.7978 | 80.9282 | 5.2433 |
| 114 | 0.5085 | 0.0896 | 5.6726 | 0.0000 | 0.3328 | 0.6842 | 1336.9253 | 0.0000 | 1.8041 | 80.9652 | 5.2535 |
| 115 | 0.5134 | 0.0891 | 5.7611 | 0.0000 | 0.3388 | 0.6881 | 1320.9951 | 0.0000 | 1.7763 | 80.7592 | 5.1973 |
| 116 | 0.5031 | 0.0896 | 5.6149 | 0.0000 | 0.3275 | 0.6788 | 1336.2369 | 0.0000 | 1.8039 | 81.0381 | 5.2737 |
| 117 | 0.5097 | 0.0895 | 5.6931 | 0.0000 | 0.3342 | 0.6851 | 1335.9675 | 0.0000 | 1.7990 | 80.9900 | 5.2604 |
| 118 | 0.5059 | 0.0895 | 5.6514 | 0.0000 | 0.3304 | 0.6813 | 1337.9185 | 0.0000 | 1.8018 | 81.0473 | 5.2763 |
| 121 | 0.5014 | 0.0896 | 5.5958 | 0.0000 | 0.3258 | 0.6770 | 1329.3209 | 0.0000 | 1.8022 | 80.9556 | 5.2509 |
| 122 | 0.5053 | 0.0897 | 5.6324 | 0.0000 | 0.3294 | 0.6811 | 1336.8162 | 0.0000 | 1.8074 | 80.9749 | 5.2562 |
| 123 | 0.5069 | 0.0897 | 5.6541 | 0.0000 | 0.3312 | 0.6827 | 1337.9102 | 0.0000 | 1.8058 | 81.0299 | 5.2714 |
| 124 | 0.5034 | 0.0897 | 5.6147 | 0.0000 | 0.3277 | 0.6791 | 1335.1868 | 0.0000 | 1.8054 | 81.0126 | 5.2667 |
| 125 | 0.5034 | 0.0897 | 5.6149 | 0.0000 | 0.3277 | 0.6792 | 1335.1948 | 0.0000 | 1.8054 | 81.0119 | 5.2665 |
| 126 | 0.5059 | 0.0895 | 5.6515 | 0.0000 | 0.3304 | 0.6813 | 1337.9185 | 0.0000 | 1.8019 | 81.0477 | 5.2764 |
| 127 | 0.5088 | 0.0895 | 5.6830 | 0.0000 | 0.3333 | 0.6842 | 1337.0129 | 0.0000 | 1.8002 | 81.0200 | 5.2687 |
| 128 | 0.5105 | 0.0894 | 5.7138 | 0.0000 | 0.3354 | 0.6857 | 1334.9332 | 0.0000 | 1.7920 | 80.9583 | 5.2516 |
| 129 | 0.5021 | 0.0895 | 5.6096 | 0.0000 | 0.3266 | 0.6775 | 1336.2555 | 0.0000 | 1.8000 | 81.0265 | 5.2705 |
| 130 | 0.4982 | 0.0893 | 5.5774 | 0.0000 | 0.3231 | 0.6733 | 1331.7279 | 0.0000 | 1.7900 | 80.9374 | 5.2459 |
| 131 | 0.5015 | 0.0895 | 5.6044 | 0.0000 | 0.3261 | 0.6769 | 1335.7315 | 0.0000 | 1.7992 | 81.0180 | 5.2682 |
| 132 | 0.4998 | 0.0894 | 5.5895 | 0.0000 | 0.3245 | 0.6750 | 1333.8376 | 0.0000 | 1.7950 | 80.9805 | 5.2578 |
| 133 | 0.5016 | 0.0895 | 5.6049 | 0.0000 | 0.3262 | 0.6770 | 1335.7842 | 0.0000 | 1.7994 | 81.0194 | 5.2685 |
| 134 | 0.5030 | 0.0895 | 5.6191 | 0.0000 | 0.3276 | 0.6785 | 1336.9797 | 0.0000 | 1.8014 | 81.0396 | 5.2741 |
| 135 | 0.4995 | 0.0894 | 5.5878 | 0.0000 | 0.3243 | 0.6747 | 1333.6566 | 0.0000 | 1.7938 | 80.9725 | 5.2556 |
| 136 | 0.5011 | 0.0895 | 5.6010 | 0.0000 | 0.3257 | 0.6764 | 1335.4044 | 0.0000 | 1.7980 | 81.0093 | 5.2657 |
| 139 | 0.5043 | 0.0896 | 5.6276 | 0.0000 | 0.3286 | 0.6799 | 1337.3387 | 0.0000 | 1.8043 | 81.0522 | 5.2777 |
| 140 | 0.5016 | 0.0895 | 5.6048 | 0.0000 | 0.3262 | 0.6770 | 1335.7685 | 0.0000 | 1.7993 | 81.0190 | 5.2684 |
| 141 | 0.5003 | 0.0894 | 5.5941 | 0.0000 | 0.3250 | 0.6756 | 1334.4956 | 0.0000 | 1.7965 | 80.9940 | 5.2615 |
| 142 | 0.4999 | 0.0895 | 5.5875 | 0.0000 | 0.3246 | 0.6753 | 1332.5137 | 0.0000 | 1.7967 | 80.9808 | 5.2578 |
| 143 | 0.5044 | 0.0896 | 5.6285 | 0.0000 | 0.3288 | 0.6800 | 1337.3562 | 0.0000 | 1.8047 | 81.0522 | 5.2777 |
| 144 | 0.5089 | 0.0895 | 5.6888 | 0.0000 | 0.3336 | 0.6843 | 1336.7644 | 0.0000 | 1.7981 | 81.0113 | 5.2663 |
| 145 | 0.5123 | 0.0892 | 5.7420 | 0.0000 | 0.3374 | 0.6872 | 1331.1765 | 0.0000 | 1.7834 | 80.8707 | 5.2276 |
| 146 | 0.5062 | 0.0897 | 5.6455 | 0.0000 | 0.3304 | 0.6819 | 1337.8693 | 0.0000 | 1.8061 | 81.0415 | 5.2747 |
| 154 | 0.4967 | 0.0892 | 5.5673 | 0.0000 | 0.3219 | 0.6716 | 1329.5676 | 0.0000 | 1.7845 | 80.8898 | 5.2328 |
| 155 | 0.4987 | 0.0894 | 5.5816 | 0.0000 | 0.3236 | 0.6739 | 1332.5384 | 0.0000 | 1.7918 | 80.9534 | 5.2503 |
| 158 | 0.4966 | 0.0892 | 5.5665 | 0.0000 | 0.3218 | 0.6715 | 1329.3202 | 0.0000 | 1.7842 | 80.8864 | 5.2319 |
| 159 | 0.4949 | 0.0891 | 5.5556 | 0.0000 | 0.3203 | 0.6695 | 1326.3748 | 0.0000 | 1.7769 | 80.8227 | 5.2145 |
| 164 | 0.4992 | 0.0894 | 5.5851 | 0.0000 | 0.3240 | 0.6744 | 1333.1522 | 0.0000 | 1.7933 | 80.9662 | 5.2538 |
| 165 | 0.5003 | 0.0894 | 5.5935 | 0.0000 | 0.3250 | 0.6755 | 1334.4151 | 0.0000 | 1.7963 | 80.9920 | 5.2609 |
| 166 | 0.4987 | 0.0894 | 5.5816 | 0.0000 | 0.3236 | 0.6739 | 1332.5384 | 0.0000 | 1.7918 | 80.9534 | 5.2503 |
| 167 | 0.5009 | 0.0895 | 5.5985 | 0.0000 | 0.3255 | 0.6762 | 1335.0669 | 0.0000 | 1.7977 | 81.0051 | 5.2646 |
| 168 | 0.5045 | 0.0896 | 5.6271 | 0.0000 | 0.3288 | 0.6802 | 1337.0998 | 0.0000 | 1.8057 | 81.0440 | 5.2754 |

|     |        |        |        |        |        |        |           |        |        |         |        |
|-----|--------|--------|--------|--------|--------|--------|-----------|--------|--------|---------|--------|
| 169 | 0.5087 | 0.0895 | 5.6822 | 0.0000 | 0.3332 | 0.6842 | 1337.0489 | 0.0000 | 1.8004 | 81.0211 | 5.2690 |
| 170 | 0.5064 | 0.0897 | 5.6476 | 0.0000 | 0.3307 | 0.6822 | 1337.8920 | 0.0000 | 1.8064 | 81.0267 | 5.2706 |
| 171 | 0.5052 | 0.0897 | 5.6337 | 0.0000 | 0.3294 | 0.6810 | 1337.3785 | 0.0000 | 1.8066 | 81.0327 | 5.2722 |
| 172 | 0.4938 | 0.0890 | 5.5487 | 0.0000 | 0.3193 | 0.6682 | 1324.1103 | 0.0000 | 1.7716 | 80.7755 | 5.2017 |
| 173 | 0.4939 | 0.0890 | 5.5497 | 0.0000 | 0.3195 | 0.6684 | 1324.4364 | 0.0000 | 1.7724 | 80.7827 | 5.2037 |
| 176 | 0.5067 | 0.0896 | 5.6535 | 0.0000 | 0.3311 | 0.6824 | 1337.9140 | 0.0000 | 1.8051 | 81.0469 | 5.2762 |
| 177 | 0.5019 | 0.0896 | 5.6006 | 0.0000 | 0.3262 | 0.6775 | 1332.6703 | 0.0000 | 1.8027 | 80.9937 | 5.2614 |
| 178 | 0.5038 | 0.0897 | 5.6191 | 0.0000 | 0.3280 | 0.6795 | 1336.1923 | 0.0000 | 1.8054 | 81.0303 | 5.2716 |
| 179 | 0.5108 | 0.0895 | 5.7073 | 0.0000 | 0.3354 | 0.6862 | 1331.3220 | 0.0000 | 1.7960 | 80.8940 | 5.2340 |
| 180 | 0.5104 | 0.0895 | 5.7019 | 0.0000 | 0.3350 | 0.6859 | 1332.3441 | 0.0000 | 1.7976 | 80.9037 | 5.2366 |
| 181 | 0.5077 | 0.0895 | 5.6728 | 0.0000 | 0.3323 | 0.6831 | 1337.5066 | 0.0000 | 1.8006 | 81.0342 | 5.2726 |
| 182 | 0.5077 | 0.0896 | 5.6692 | 0.0000 | 0.3322 | 0.6832 | 1337.6189 | 0.0000 | 1.8022 | 81.0397 | 5.2742 |
| 183 | 0.5066 | 0.0897 | 5.6470 | 0.0000 | 0.3308 | 0.6825 | 1337.7895 | 0.0000 | 1.8075 | 80.8449 | 5.2205 |
| 184 | 0.5071 | 0.0897 | 5.6529 | 0.0000 | 0.3313 | 0.6829 | 1337.9160 | 0.0000 | 1.8071 | 80.8422 | 5.2198 |
| 185 | 0.5047 | 0.0897 | 5.6253 | 0.0000 | 0.3288 | 0.6805 | 1334.1355 | 0.0000 | 1.8076 | 80.8571 | 5.2239 |
| 186 | 0.5083 | 0.0896 | 5.6738 | 0.0000 | 0.3327 | 0.6839 | 1337.3243 | 0.0000 | 1.8028 | 81.0229 | 5.2695 |
| 187 | 0.5089 | 0.0895 | 5.6892 | 0.0000 | 0.3336 | 0.6843 | 1336.7370 | 0.0000 | 1.7980 | 81.0104 | 5.2660 |
| 188 | 0.5082 | 0.0896 | 5.6710 | 0.0000 | 0.3326 | 0.6839 | 1337.4062 | 0.0000 | 1.8036 | 81.0194 | 5.2685 |
| 189 | 0.5077 | 0.0896 | 5.6696 | 0.0000 | 0.3322 | 0.6832 | 1337.6099 | 0.0000 | 1.8021 | 81.0394 | 5.2741 |
| 190 | 0.5034 | 0.0896 | 5.6188 | 0.0000 | 0.3278 | 0.6790 | 1336.7553 | 0.0000 | 1.8036 | 81.0446 | 5.2756 |
| 191 | 0.5116 | 0.0894 | 5.7232 | 0.0000 | 0.3364 | 0.6868 | 1328.7995 | 0.0000 | 1.7910 | 80.8692 | 5.2272 |
| 192 | 0.5125 | 0.0893 | 5.7392 | 0.0000 | 0.3375 | 0.6875 | 1322.9174 | 0.0000 | 1.7853 | 80.8032 | 5.2092 |
| 193 | 0.5095 | 0.0896 | 5.6864 | 0.0000 | 0.3339 | 0.6852 | 1333.5651 | 0.0000 | 1.8017 | 80.8557 | 5.2235 |
| 194 | 0.5101 | 0.0896 | 5.6961 | 0.0000 | 0.3346 | 0.6856 | 1332.5772 | 0.0000 | 1.7992 | 80.8875 | 5.2322 |
| 195 | 0.5113 | 0.0894 | 5.7177 | 0.0000 | 0.3360 | 0.6866 | 1330.8059 | 0.0000 | 1.7927 | 80.8960 | 5.2345 |
| 196 | 0.4996 | 0.0894 | 5.5884 | 0.0000 | 0.3244 | 0.6748 | 1333.6791 | 0.0000 | 1.7945 | 80.9766 | 5.2567 |
| 197 | 0.4996 | 0.0894 | 5.5885 | 0.0000 | 0.3244 | 0.6749 | 1333.6980 | 0.0000 | 1.7945 | 80.9771 | 5.2568 |
| 198 | 0.5015 | 0.0895 | 5.6042 | 0.0000 | 0.3261 | 0.6769 | 1335.7216 | 0.0000 | 1.7992 | 81.0178 | 5.2681 |
| 204 | 0.5104 | 0.0896 | 5.6994 | 0.0000 | 0.3349 | 0.6859 | 1324.7021 | 0.0000 | 1.7986 | 80.6850 | 5.1773 |
| 205 | 0.5095 | 0.0896 | 5.6856 | 0.0000 | 0.3339 | 0.6852 | 1330.6002 | 0.0000 | 1.8020 | 80.6898 | 5.1786 |
| 206 | 0.5099 | 0.0896 | 5.6911 | 0.0000 | 0.3343 | 0.6855 | 1329.2563 | 0.0000 | 1.8007 | 80.7241 | 5.1878 |
| 210 | 0.5090 | 0.0895 | 5.6895 | 0.0000 | 0.3336 | 0.6843 | 1336.7191 | 0.0000 | 1.7979 | 81.0099 | 5.2659 |
| 211 | 0.4999 | 0.0894 | 5.5930 | 0.0000 | 0.3247 | 0.6751 | 1334.4846 | 0.0000 | 1.7946 | 80.9826 | 5.2583 |
| 212 | 0.5065 | 0.0896 | 5.6530 | 0.0000 | 0.3309 | 0.6821 | 1337.9160 | 0.0000 | 1.8042 | 81.0527 | 5.2778 |
| 213 | 0.4962 | 0.0892 | 5.5639 | 0.0000 | 0.3214 | 0.6710 | 1328.6967 | 0.0000 | 1.7826 | 80.8726 | 5.2281 |
| 214 | 0.4965 | 0.0892 | 5.5659 | 0.0000 | 0.3217 | 0.6714 | 1329.1835 | 0.0000 | 1.7838 | 80.8831 | 5.2310 |
| 215 | 0.5011 | 0.0896 | 5.5936 | 0.0000 | 0.3255 | 0.6767 | 1330.1606 | 0.0000 | 1.8012 | 80.9692 | 5.2546 |
| 216 | 0.5013 | 0.0896 | 5.5946 | 0.0000 | 0.3256 | 0.6769 | 1329.4706 | 0.0000 | 1.8017 | 80.9598 | 5.2521 |
| 224 | 0.5089 | 0.0896 | 5.6793 | 0.0000 | 0.3333 | 0.6845 | 1336.6190 | 0.0000 | 1.8026 | 80.9861 | 5.2593 |
| 225 | 0.5107 | 0.0895 | 5.7076 | 0.0000 | 0.3353 | 0.6861 | 1332.7439 | 0.0000 | 1.7958 | 80.9234 | 5.2420 |
| 226 | 0.5135 | 0.0891 | 5.7648 | 0.0000 | 0.3389 | 0.6880 | 1325.7005 | 0.0000 | 1.7744 | 80.7782 | 5.2024 |
| 227 | 0.5075 | 0.0897 | 5.6600 | 0.0000 | 0.3318 | 0.6832 | 1337.7867 | 0.0000 | 1.8056 | 81.0039 | 5.2642 |
| 228 | 0.5045 | 0.0897 | 5.6238 | 0.0000 | 0.3287 | 0.6803 | 1335.4478 | 0.0000 | 1.8071 | 80.9640 | 5.2532 |
| 229 | 0.5115 | 0.0894 | 5.7209 | 0.0000 | 0.3363 | 0.6868 | 1328.2143 | 0.0000 | 1.7918 | 80.8603 | 5.2248 |
| 230 | 0.5064 | 0.0897 | 5.6445 | 0.0000 | 0.3305 | 0.6822 | 1337.6950 | 0.0000 | 1.8075 | 80.9097 | 5.2383 |
| 231 | 0.5063 | 0.0897 | 5.6436 | 0.0000 | 0.3305 | 0.6822 | 1337.5972 | 0.0000 | 1.8076 | 80.8804 | 5.2302 |
| 236 | 0.4984 | 0.0893 | 5.5791 | 0.0000 | 0.3233 | 0.6735 | 1332.0743 | 0.0000 | 1.7908 | 80.9441 | 5.2477 |
| 237 | 0.4993 | 0.0894 | 5.5856 | 0.0000 | 0.3241 | 0.6745 | 1333.2161 | 0.0000 | 1.7935 | 80.9677 | 5.2542 |
| 238 | 0.4976 | 0.0893 | 5.5730 | 0.0000 | 0.3226 | 0.6726 | 1330.8529 | 0.0000 | 1.7878 | 80.9179 | 5.2405 |
| 239 | 0.4969 | 0.0892 | 5.5685 | 0.0000 | 0.3220 | 0.6718 | 1329.8424 | 0.0000 | 1.7853 | 80.8965 | 5.2346 |
| 240 | 0.5090 | 0.0896 | 5.6834 | 0.0000 | 0.3335 | 0.6846 | 1336.7373 | 0.0000 | 1.8011 | 81.0079 | 5.2654 |
| 241 | 0.5108 | 0.0894 | 5.7118 | 0.0000 | 0.3355 | 0.6861 | 1334.1640 | 0.0000 | 1.7939 | 80.9498 | 5.2493 |
| 242 | 0.5069 | 0.0897 | 5.6539 | 0.0000 | 0.3312 | 0.6826 | 1337.9116 | 0.0000 | 1.8056 | 81.0367 | 5.2733 |
| 243 | 0.5109 | 0.0893 | 5.7198 | 0.0000 | 0.3358 | 0.6860 | 1334.3563 | 0.0000 | 1.7903 | 80.9424 | 5.2473 |
| 244 | 0.5104 | 0.0894 | 5.7103 | 0.0000 | 0.3352 | 0.6855 | 1335.2155 | 0.0000 | 1.7931 | 80.9666 | 5.2539 |
| 245 | 0.5108 | 0.0895 | 5.7091 | 0.0000 | 0.3354 | 0.6861 | 1333.2381 | 0.0000 | 1.7952 | 80.9341 | 5.2450 |
| 246 | 0.5096 | 0.0896 | 5.6896 | 0.0000 | 0.3340 | 0.6851 | 1335.8032 | 0.0000 | 1.8002 | 80.9787 | 5.2573 |
| 247 | 0.5092 | 0.0896 | 5.6851 | 0.0000 | 0.3337 | 0.6848 | 1336.3551 | 0.0000 | 1.8011 | 80.9922 | 5.2610 |
| 248 | 0.5106 | 0.0895 | 5.7063 | 0.0000 | 0.3352 | 0.6860 | 1333.4943 | 0.0000 | 1.7960 | 80.9377 | 5.2460 |
| 249 | 0.5101 | 0.0895 | 5.6993 | 0.0000 | 0.3347 | 0.6856 | 1334.8670 | 0.0000 | 1.7978 | 80.9638 | 5.2532 |
| 250 | 0.5067 | 0.0896 | 5.6535 | 0.0000 | 0.3310 | 0.6824 | 1337.9142 | 0.0000 | 1.8050 | 81.0479 | 5.2765 |
| 251 | 0.5018 | 0.0895 | 5.6037 | 0.0000 | 0.3263 | 0.6773 | 1335.2336 | 0.0000 | 1.8011 | 81.0217 | 5.2692 |
| 252 | 0.5064 | 0.0897 | 5.6473 | 0.0000 | 0.3307 | 0.6822 | 1337.8894 | 0.0000 | 1.8064 | 81.0290 | 5.2712 |
| 253 | 0.4996 | 0.0894 | 5.5884 | 0.0000 | 0.3244 | 0.6748 | 1333.6791 | 0.0000 | 1.7945 | 80.9766 | 5.2567 |
| 254 | 0.4996 | 0.0894 | 5.5879 | 0.0000 | 0.3243 | 0.6748 | 1333.6142 | 0.0000 | 1.7943 | 80.9750 | 5.2562 |
| 255 | 0.5042 | 0.0895 | 5.6319 | 0.0000 | 0.3288 | 0.6797 | 1337.6084 | 0.0000 | 1.8023 | 81.0488 | 5.2767 |
| 256 | 0.5010 | 0.0895 | 5.6006 | 0.0000 | 0.3257 | 0.6764 | 1335.3649 | 0.0000 | 1.7979 | 81.0082 | 5.2654 |
| 257 | 0.4965 | 0.0892 | 5.5659 | 0.0000 | 0.3217 | 0.6713 | 1329.2465 | 0.0000 | 1.7836 | 80.8820 | 5.2307 |
| 258 | 0.4982 | 0.0893 | 5.5778 | 0.0000 | 0.3231 | 0.6733 | 1331.8920 | 0.0000 | 1.7899 | 80.9373 | 5.2459 |

|     |        |        |        |        |        |        |           |        |        |         |        |
|-----|--------|--------|--------|--------|--------|--------|-----------|--------|--------|---------|--------|
| 259 | 0.5042 | 0.0895 | 5.6317 | 0.0000 | 0.3287 | 0.6797 | 1337.6043 | 0.0000 | 1.8023 | 81.0485 | 5.2766 |
| 260 | 0.5013 | 0.0895 | 5.6025 | 0.0000 | 0.3259 | 0.6767 | 1335.5581 | 0.0000 | 1.7986 | 81.0134 | 5.2669 |
| 261 | 0.4991 | 0.0894 | 5.5845 | 0.0000 | 0.3239 | 0.6743 | 1333.0494 | 0.0000 | 1.7930 | 80.9636 | 5.2531 |
| 262 | 0.4977 | 0.0893 | 5.5743 | 0.0000 | 0.3227 | 0.6727 | 1331.1425 | 0.0000 | 1.7883 | 80.9232 | 5.2420 |
| 263 | 0.4986 | 0.0893 | 5.5808 | 0.0000 | 0.3235 | 0.6738 | 1332.4088 | 0.0000 | 1.7914 | 80.9502 | 5.2494 |
| 264 | 0.4991 | 0.0894 | 5.5845 | 0.0000 | 0.3239 | 0.6743 | 1333.0494 | 0.0000 | 1.7930 | 80.9636 | 5.2531 |
| 265 | 0.5035 | 0.0897 | 5.6164 | 0.0000 | 0.3278 | 0.6793 | 1335.6892 | 0.0000 | 1.8054 | 81.0221 | 5.2693 |
| 266 | 0.5063 | 0.0897 | 5.6468 | 0.0000 | 0.3306 | 0.6821 | 1337.8843 | 0.0000 | 1.8063 | 81.0332 | 5.2724 |
| 267 | 0.5061 | 0.0897 | 5.6450 | 0.0000 | 0.3304 | 0.6818 | 1337.8637 | 0.0000 | 1.8060 | 81.0439 | 5.2754 |
| 268 | 0.5041 | 0.0897 | 5.6217 | 0.0000 | 0.3283 | 0.6798 | 1336.3451 | 0.0000 | 1.8059 | 81.0274 | 5.2708 |
| 269 | 0.5035 | 0.0897 | 5.6165 | 0.0000 | 0.3278 | 0.6793 | 1335.6498 | 0.0000 | 1.8054 | 81.0207 | 5.2689 |
| 270 | 0.5080 | 0.0896 | 5.6672 | 0.0000 | 0.3323 | 0.6837 | 1337.5095 | 0.0000 | 1.8045 | 81.0067 | 5.2650 |
| 273 | 0.5105 | 0.0895 | 5.7014 | 0.0000 | 0.3350 | 0.6860 | 1323.9075 | 0.0000 | 1.7981 | 80.6875 | 5.1780 |
| 274 | 0.5111 | 0.0895 | 5.7120 | 0.0000 | 0.3358 | 0.6865 | 1318.3099 | 0.0000 | 1.7950 | 80.6699 | 5.1733 |
| 275 | 0.5125 | 0.0893 | 5.7372 | 0.0000 | 0.3374 | 0.6876 | 1302.7327 | 0.0000 | 1.7863 | 80.6145 | 5.1585 |
| 279 | 0.5053 | 0.0897 | 5.6361 | 0.0000 | 0.3296 | 0.6811 | 1337.5965 | 0.0000 | 1.8061 | 81.0456 | 5.2758 |
| 280 | 0.5104 | 0.0895 | 5.7031 | 0.0000 | 0.3350 | 0.6858 | 1334.5049 | 0.0000 | 1.7967 | 80.9576 | 5.2515 |
| 281 | 0.5039 | 0.0897 | 5.6194 | 0.0000 | 0.3282 | 0.6797 | 1335.5935 | 0.0000 | 1.8062 | 81.0059 | 5.2648 |
| 282 | 0.5095 | 0.0895 | 5.6898 | 0.0000 | 0.3340 | 0.6850 | 1336.1523 | 0.0000 | 1.7999 | 80.9929 | 5.2612 |
| 283 | 0.5149 | 0.0888 | 5.8008 | 0.0000 | 0.3409 | 0.6888 | 1317.9136 | 0.0000 | 1.7576 | 80.6284 | 5.1622 |
| 284 | 0.5137 | 0.0891 | 5.7668 | 0.0000 | 0.3391 | 0.6883 | 1320.0758 | 0.0000 | 1.7739 | 80.7413 | 5.1925 |
| 285 | 0.5125 | 0.0893 | 5.7399 | 0.0000 | 0.3375 | 0.6875 | 1325.8506 | 0.0000 | 1.7849 | 80.8289 | 5.2162 |
| 286 | 0.5080 | 0.0896 | 5.6674 | 0.0000 | 0.3323 | 0.6837 | 1337.5042 | 0.0000 | 1.8045 | 81.0076 | 5.2653 |
| 287 | 0.5065 | 0.0897 | 5.6476 | 0.0000 | 0.3307 | 0.6822 | 1337.8925 | 0.0000 | 1.8064 | 81.0261 | 5.2704 |
| 288 | 0.5084 | 0.0896 | 5.6741 | 0.0000 | 0.3328 | 0.6840 | 1337.3136 | 0.0000 | 1.8028 | 81.0231 | 5.2696 |
| 292 | 0.5060 | 0.0897 | 5.6442 | 0.0000 | 0.3303 | 0.6817 | 1337.8538 | 0.0000 | 1.8059 | 81.0471 | 5.2762 |
| 293 | 0.5034 | 0.0896 | 5.6169 | 0.0000 | 0.3278 | 0.6791 | 1336.3020 | 0.0000 | 1.8045 | 81.0380 | 5.2737 |
| 294 | 0.4994 | 0.0894 | 5.5866 | 0.0000 | 0.3242 | 0.6746 | 1333.4314 | 0.0000 | 1.7937 | 80.9704 | 5.2550 |
| 295 | 0.4988 | 0.0894 | 5.5819 | 0.0000 | 0.3236 | 0.6739 | 1332.6454 | 0.0000 | 1.7918 | 80.9535 | 5.2503 |
| 296 | 0.4954 | 0.0891 | 5.5592 | 0.0000 | 0.3208 | 0.6701 | 1327.5920 | 0.0000 | 1.7790 | 80.8427 | 5.2199 |
| 297 | 0.4985 | 0.0893 | 5.5798 | 0.0000 | 0.3234 | 0.6736 | 1332.2287 | 0.0000 | 1.7909 | 80.9457 | 5.2482 |
| 298 | 0.4997 | 0.0894 | 5.5893 | 0.0000 | 0.3245 | 0.6749 | 1333.8755 | 0.0000 | 1.7945 | 80.9782 | 5.2571 |
| 299 | 0.5001 | 0.0894 | 5.5929 | 0.0000 | 0.3248 | 0.6754 | 1334.4085 | 0.0000 | 1.7955 | 80.9878 | 5.2598 |
| 300 | 0.5061 | 0.0897 | 5.6445 | 0.0000 | 0.3303 | 0.6818 | 1337.8583 | 0.0000 | 1.8059 | 81.0458 | 5.2759 |
| 301 | 0.5045 | 0.0897 | 5.6277 | 0.0000 | 0.3288 | 0.6802 | 1337.1416 | 0.0000 | 1.8057 | 81.0443 | 5.2755 |
| 302 | 0.5034 | 0.0896 | 5.6154 | 0.0000 | 0.3277 | 0.6791 | 1335.6485 | 0.0000 | 1.8051 | 81.0238 | 5.2698 |
| 303 | 0.5035 | 0.0897 | 5.6161 | 0.0000 | 0.3278 | 0.6793 | 1335.3489 | 0.0000 | 1.8056 | 81.0124 | 5.2666 |
| 306 | 0.4949 | 0.0891 | 5.5562 | 0.0000 | 0.3203 | 0.6695 | 1326.7666 | 0.0000 | 1.7768 | 80.8237 | 5.2148 |
| 307 | 0.4968 | 0.0892 | 5.5680 | 0.0000 | 0.3219 | 0.6717 | 1329.7988 | 0.0000 | 1.7847 | 80.8920 | 5.2334 |
| 308 | 0.4974 | 0.0893 | 5.5722 | 0.0000 | 0.3225 | 0.6724 | 1330.7256 | 0.0000 | 1.7871 | 80.9129 | 5.2392 |
| 309 | 0.5000 | 0.0894 | 5.5919 | 0.0000 | 0.3248 | 0.6753 | 1334.2128 | 0.0000 | 1.7956 | 80.9869 | 5.2595 |
| 310 | 0.5019 | 0.0895 | 5.6086 | 0.0000 | 0.3265 | 0.6773 | 1336.1744 | 0.0000 | 1.7997 | 81.0242 | 5.2699 |
| 311 | 0.5042 | 0.0895 | 5.6317 | 0.0000 | 0.3287 | 0.6797 | 1337.6043 | 0.0000 | 1.8023 | 81.0485 | 5.2766 |
| 312 | 0.5059 | 0.0895 | 5.6514 | 0.0000 | 0.3304 | 0.6813 | 1337.9185 | 0.0000 | 1.8019 | 81.0476 | 5.2764 |
| 313 | 0.5043 | 0.0895 | 5.6322 | 0.0000 | 0.3288 | 0.6798 | 1337.6194 | 0.0000 | 1.8024 | 81.0494 | 5.2769 |
| 314 | 0.5043 | 0.0895 | 5.6323 | 0.0000 | 0.3288 | 0.6798 | 1337.6213 | 0.0000 | 1.8024 | 81.0495 | 5.2769 |
| 315 | 0.5021 | 0.0895 | 5.6096 | 0.0000 | 0.3266 | 0.6775 | 1336.2555 | 0.0000 | 1.8000 | 81.0265 | 5.2705 |
| 317 | 0.5054 | 0.0897 | 5.6323 | 0.0000 | 0.3295 | 0.6812 | 1335.4324 | 0.0000 | 1.8080 | 80.7981 | 5.2078 |
| 318 | 0.5060 | 0.0897 | 5.6402 | 0.0000 | 0.3301 | 0.6818 | 1337.5166 | 0.0000 | 1.8074 | 80.9693 | 5.2547 |
| 319 | 0.5021 | 0.0896 | 5.6069 | 0.0000 | 0.3266 | 0.6777 | 1335.6406 | 0.0000 | 1.8017 | 81.0278 | 5.2709 |
| 320 | 0.5000 | 0.0895 | 5.5882 | 0.0000 | 0.3246 | 0.6754 | 1332.6866 | 0.0000 | 1.7969 | 80.9830 | 5.2585 |
| 321 | 0.5066 | 0.0896 | 5.6532 | 0.0000 | 0.3310 | 0.6823 | 1337.9151 | 0.0000 | 1.8047 | 81.0507 | 5.2773 |
| 322 | 0.5017 | 0.0895 | 5.6020 | 0.0000 | 0.3261 | 0.6772 | 1334.9101 | 0.0000 | 1.8010 | 81.0182 | 5.2682 |
| 323 | 0.5063 | 0.0896 | 5.6524 | 0.0000 | 0.3307 | 0.6818 | 1337.9172 | 0.0000 | 1.8035 | 81.0531 | 5.2779 |
| 324 | 0.5053 | 0.0896 | 5.6389 | 0.0000 | 0.3297 | 0.6809 | 1337.7725 | 0.0000 | 1.8047 | 81.0560 | 5.2787 |
| 325 | 0.5128 | 0.0892 | 5.7510 | 0.0000 | 0.3380 | 0.6875 | 1329.4743 | 0.0000 | 1.7800 | 80.8374 | 5.2185 |
| 326 | 0.5106 | 0.0895 | 5.7074 | 0.0000 | 0.3353 | 0.6860 | 1333.8766 | 0.0000 | 1.7955 | 80.9459 | 5.2482 |
| 327 | 0.5085 | 0.0896 | 5.6771 | 0.0000 | 0.3329 | 0.6840 | 1337.2253 | 0.0000 | 1.8019 | 81.0242 | 5.2699 |
| 328 | 0.5108 | 0.0893 | 5.7169 | 0.0000 | 0.3357 | 0.6859 | 1334.6135 | 0.0000 | 1.7913 | 80.9499 | 5.2493 |
| 329 | 0.5103 | 0.0894 | 5.7090 | 0.0000 | 0.3351 | 0.6855 | 1335.3197 | 0.0000 | 1.7935 | 80.9697 | 5.2548 |
| 330 | 0.5092 | 0.0895 | 5.6875 | 0.0000 | 0.3337 | 0.6847 | 1336.5694 | 0.0000 | 1.7999 | 81.0062 | 5.2649 |
| 331 | 0.5087 | 0.0895 | 5.6813 | 0.0000 | 0.3332 | 0.6842 | 1337.0864 | 0.0000 | 1.8007 | 81.0221 | 5.2693 |
| 332 | 0.5069 | 0.0897 | 5.6539 | 0.0000 | 0.3312 | 0.6826 | 1337.9119 | 0.0000 | 1.8055 | 81.0380 | 5.2737 |
| 333 | 0.5063 | 0.0897 | 5.6467 | 0.0000 | 0.3306 | 0.6821 | 1337.8835 | 0.0000 | 1.8063 | 81.0336 | 5.2725 |
| 334 | 0.5091 | 0.0896 | 5.6825 | 0.0000 | 0.3335 | 0.6847 | 1336.4673 | 0.0000 | 1.8018 | 80.9904 | 5.2605 |
| 335 | 0.5092 | 0.0896 | 5.6854 | 0.0000 | 0.3337 | 0.6848 | 1336.3395 | 0.0000 | 1.8011 | 80.9923 | 5.2610 |
| 336 | 0.5120 | 0.0893 | 5.7343 | 0.0000 | 0.3370 | 0.6870 | 1331.1042 | 0.0000 | 1.7866 | 80.8852 | 5.2316 |
| 337 | 0.5039 | 0.0897 | 5.6194 | 0.0000 | 0.3282 | 0.6797 | 1335.5935 | 0.0000 | 1.8062 | 81.0059 | 5.2648 |
| 338 | 0.5064 | 0.0897 | 5.6469 | 0.0000 | 0.3306 | 0.6821 | 1337.8852 | 0.0000 | 1.8063 | 81.0325 | 5.2722 |

|     |        |        |        |        |        |        |           |        |        |         |        |
|-----|--------|--------|--------|--------|--------|--------|-----------|--------|--------|---------|--------|
| 339 | 0.5031 | 0.0896 | 5.6122 | 0.0000 | 0.3274 | 0.6788 | 1335.0230 | 0.0000 | 1.8048 | 81.0156 | 5.2675 |
| 340 | 0.5058 | 0.0897 | 5.6407 | 0.0000 | 0.3301 | 0.6816 | 1337.7176 | 0.0000 | 1.8066 | 81.0310 | 5.2717 |
| 341 | 0.5000 | 0.0894 | 5.5912 | 0.0000 | 0.3247 | 0.6752 | 1334.1315 | 0.0000 | 1.7954 | 80.9848 | 5.2590 |
| 342 | 0.5006 | 0.0894 | 5.5967 | 0.0000 | 0.3253 | 0.6759 | 1334.8696 | 0.0000 | 1.7971 | 81.0000 | 5.2632 |
| 347 | 0.5065 | 0.0896 | 5.6529 | 0.0000 | 0.3309 | 0.6821 | 1337.9161 | 0.0000 | 1.8042 | 81.0528 | 5.2778 |
| 348 | 0.4994 | 0.0894 | 5.5871 | 0.0000 | 0.3242 | 0.6746 | 1333.5588 | 0.0000 | 1.7935 | 80.9699 | 5.2548 |
| 349 | 0.5141 | 0.0889 | 5.7795 | 0.0000 | 0.3397 | 0.6884 | 1322.5851 | 0.0000 | 1.7679 | 80.7195 | 5.1866 |
| 350 | 0.5119 | 0.0894 | 5.7288 | 0.0000 | 0.3368 | 0.6870 | 1329.0571 | 0.0000 | 1.7889 | 80.8707 | 5.2276 |
| 351 | 0.5129 | 0.0892 | 5.7513 | 0.0000 | 0.3381 | 0.6877 | 1327.0205 | 0.0000 | 1.7802 | 80.8194 | 5.2136 |
| 352 | 0.5102 | 0.0895 | 5.6999 | 0.0000 | 0.3348 | 0.6857 | 1334.3515 | 0.0000 | 1.7978 | 80.9510 | 5.2496 |
| 353 | 0.5004 | 0.0895 | 5.5930 | 0.0000 | 0.3250 | 0.6757 | 1334.1346 | 0.0000 | 1.7971 | 80.9947 | 5.2617 |
| 354 | 0.5090 | 0.0895 | 5.6899 | 0.0000 | 0.3336 | 0.6843 | 1336.6974 | 0.0000 | 1.7978 | 81.0091 | 5.2657 |
| 355 | 0.5043 | 0.0895 | 5.6322 | 0.0000 | 0.3288 | 0.6798 | 1337.6194 | 0.0000 | 1.8024 | 81.0494 | 5.2769 |
| 356 | 0.5003 | 0.0894 | 5.5940 | 0.0000 | 0.3250 | 0.6755 | 1334.5491 | 0.0000 | 1.7960 | 80.9915 | 5.2608 |
| 357 | 0.5059 | 0.0895 | 5.6514 | 0.0000 | 0.3304 | 0.6813 | 1337.9185 | 0.0000 | 1.8019 | 81.0476 | 5.2764 |
| 358 | 0.5030 | 0.0895 | 5.6191 | 0.0000 | 0.3276 | 0.6785 | 1336.9797 | 0.0000 | 1.8014 | 81.0396 | 5.2741 |
| 359 | 0.5127 | 0.0892 | 5.7464 | 0.0000 | 0.3379 | 0.6876 | 1326.2568 | 0.0000 | 1.7823 | 80.8231 | 5.2146 |
| 360 | 0.5093 | 0.0896 | 5.6853 | 0.0000 | 0.3337 | 0.6849 | 1336.0158 | 0.0000 | 1.8014 | 80.9754 | 5.2564 |
| 361 | 0.5043 | 0.0895 | 5.6321 | 0.0000 | 0.3288 | 0.6797 | 1337.6147 | 0.0000 | 1.8024 | 81.0491 | 5.2768 |
| 362 | 0.5042 | 0.0895 | 5.6314 | 0.0000 | 0.3287 | 0.6796 | 1337.5933 | 0.0000 | 1.8022 | 81.0479 | 5.2765 |
| 363 | 0.5028 | 0.0895 | 5.6177 | 0.0000 | 0.3274 | 0.6783 | 1336.8944 | 0.0000 | 1.8010 | 81.0367 | 5.2733 |
| 364 | 0.4976 | 0.0893 | 5.5726 | 0.0000 | 0.3226 | 0.6727 | 1330.3850 | 0.0000 | 1.7885 | 80.9202 | 5.2411 |
| 365 | 0.5016 | 0.0895 | 5.6036 | 0.0000 | 0.3262 | 0.6771 | 1335.4423 | 0.0000 | 1.8003 | 81.0206 | 5.2689 |
| 366 | 0.5015 | 0.0895 | 5.6008 | 0.0000 | 0.3260 | 0.6770 | 1334.7923 | 0.0000 | 1.8005 | 81.0156 | 5.2675 |
| 367 | 0.5004 | 0.0895 | 5.5919 | 0.0000 | 0.3250 | 0.6758 | 1333.5018 | 0.0000 | 1.7979 | 80.9937 | 5.2614 |
| 368 | 0.5041 | 0.0896 | 5.6267 | 0.0000 | 0.3285 | 0.6798 | 1337.3030 | 0.0000 | 1.8041 | 81.0517 | 5.2775 |
| 369 | 0.4991 | 0.0894 | 5.5795 | 0.0000 | 0.3238 | 0.6744 | 1329.4422 | 0.0000 | 1.7947 | 80.9503 | 5.2494 |
| 370 | 0.5022 | 0.0895 | 5.6105 | 0.0000 | 0.3267 | 0.6776 | 1336.3308 | 0.0000 | 1.8003 | 81.0286 | 5.2711 |
| 373 | 0.5021 | 0.0896 | 5.6055 | 0.0000 | 0.3265 | 0.6777 | 1335.2234 | 0.0000 | 1.8020 | 81.0242 | 5.2699 |
| 374 | 0.4997 | 0.0895 | 5.5858 | 0.0000 | 0.3244 | 0.6751 | 1331.9757 | 0.0000 | 1.7963 | 80.9750 | 5.2562 |
| 375 | 0.5040 | 0.0896 | 5.6257 | 0.0000 | 0.3284 | 0.6796 | 1337.2588 | 0.0000 | 1.8039 | 81.0509 | 5.2773 |
| 376 | 0.4978 | 0.0893 | 5.5751 | 0.0000 | 0.3228 | 0.6728 | 1331.4023 | 0.0000 | 1.7884 | 80.9249 | 5.2424 |
| 377 | 0.5043 | 0.0895 | 5.6323 | 0.0000 | 0.3288 | 0.6798 | 1337.6213 | 0.0000 | 1.8024 | 81.0495 | 5.2769 |
| 378 | 0.4975 | 0.0893 | 5.5726 | 0.0000 | 0.3225 | 0.6724 | 1330.8005 | 0.0000 | 1.7873 | 80.9148 | 5.2397 |
| 379 | 0.5043 | 0.0895 | 5.6327 | 0.0000 | 0.3289 | 0.6798 | 1337.6343 | 0.0000 | 1.8026 | 81.0502 | 5.2771 |
| 380 | 0.5014 | 0.0895 | 5.6036 | 0.0000 | 0.3260 | 0.6768 | 1335.6600 | 0.0000 | 1.7989 | 81.0161 | 5.2676 |
| 381 | 0.4977 | 0.0893 | 5.5741 | 0.0000 | 0.3227 | 0.6727 | 1331.0956 | 0.0000 | 1.7882 | 80.9221 | 5.2417 |
| 382 | 0.4947 | 0.0891 | 5.5547 | 0.0000 | 0.3202 | 0.6693 | 1326.2288 | 0.0000 | 1.7759 | 80.8152 | 5.2125 |
| 383 | 0.4969 | 0.0892 | 5.5685 | 0.0000 | 0.3220 | 0.6718 | 1329.8811 | 0.0000 | 1.7852 | 80.8959 | 5.2345 |
| 384 | 0.5003 | 0.0894 | 5.5940 | 0.0000 | 0.3250 | 0.6755 | 1334.5491 | 0.0000 | 1.7960 | 80.9915 | 5.2608 |
| 385 | 0.5001 | 0.0894 | 5.5924 | 0.0000 | 0.3248 | 0.6754 | 1334.2764 | 0.0000 | 1.7958 | 80.9885 | 5.2600 |
| 386 | 0.5010 | 0.0895 | 5.6000 | 0.0000 | 0.3257 | 0.6764 | 1335.2273 | 0.0000 | 1.7983 | 81.0091 | 5.2657 |
| 387 | 0.5000 | 0.0894 | 5.5912 | 0.0000 | 0.3247 | 0.6753 | 1334.0732 | 0.0000 | 1.7957 | 80.9863 | 5.2594 |
| 388 | 0.5126 | 0.0892 | 5.7463 | 0.0000 | 0.3378 | 0.6875 | 1329.0854 | 0.0000 | 1.7821 | 80.8452 | 5.2206 |
| 389 | 0.5076 | 0.0896 | 5.6632 | 0.0000 | 0.3319 | 0.6832 | 1337.7424 | 0.0000 | 1.8045 | 81.0334 | 5.2724 |
| 394 | 0.5107 | 0.0894 | 5.7092 | 0.0000 | 0.3354 | 0.6860 | 1334.2087 | 0.0000 | 1.7948 | 80.9519 | 5.2499 |
| 395 | 0.5095 | 0.0895 | 5.6928 | 0.0000 | 0.3341 | 0.6849 | 1336.3532 | 0.0000 | 1.7984 | 81.0011 | 5.2635 |
| 396 | 0.5046 | 0.0897 | 5.6272 | 0.0000 | 0.3288 | 0.6803 | 1336.9019 | 0.0000 | 1.8063 | 81.0318 | 5.2720 |
| 397 | 0.5059 | 0.0897 | 5.6408 | 0.0000 | 0.3301 | 0.6816 | 1337.7206 | 0.0000 | 1.8066 | 81.0304 | 5.2716 |
| 398 | 0.5131 | 0.0892 | 5.7506 | 0.0000 | 0.3382 | 0.6880 | 1297.8421 | 0.0000 | 1.7810 | 80.6090 | 5.1570 |
| 399 | 0.5163 | 0.0882 | 5.8562 | 0.0000 | 0.3435 | 0.6890 | 1312.7108 | 0.0000 | 1.7272 | 80.3784 | 5.0964 |
| 400 | 0.5162 | 0.0882 | 5.8538 | 0.0000 | 0.3434 | 0.6890 | 1313.2026 | 0.0000 | 1.7286 | 80.3911 | 5.0997 |
| 401 | 0.5092 | 0.0896 | 5.6837 | 0.0000 | 0.3336 | 0.6848 | 1336.1325 | 0.0000 | 1.8017 | 80.9755 | 5.2564 |
| 402 | 0.5071 | 0.0897 | 5.6544 | 0.0000 | 0.3313 | 0.6828 | 1337.9056 | 0.0000 | 1.8062 | 81.0053 | 5.2646 |

### \*\*\*Random-effects model, single-level, treatment group moderators \*\*\*

\*\*\*R script:

```
#Author: Brandon S Bentzley
#Project: Meta analysis of treatments for cocaine use disorders
#Date this R script was created: 2/20/2017
#Date this R script was last updated: 04/17/2018
#Description: This script uses rma() from the package metafor to calculate random effects with
treatment group moderators only

# store the current directory
initial.dir<-getwd()
# change to the new directory
setwd("/Users/bsbentzley/Documents/Stanford/Malenka/2015.12.03 - DBS cocaine/Ranalysis")
# load the necessary libraries
library(gdata)
library(metafor)
# set the output file
sink("Output.out")
options(width=120)
# load the dataset and define variable data types
mydata = read.csv("data.csv", colClasses=c(
"Author"="character", "Year"="numeric", "Title"="character", "StudyID"="factor",
"Double_Blind"="factor", "Multisite"="factor", "Randomized"="factor", "SubDsrdr"="character",
"Placebo"="factor", "Psychotherapy"="factor", "ContingencyManagement"="factor", "Other"="factor",
"Opioid"="factor", "MiscMeds"="factor", "Psychostimulants"="factor", "Anticonvulsants"="factor",
"DopamineAgonists"="factor", "Antidepressants"="factor", "Antipsychotics"="factor",
"TreatmentNnbr"= "numeric", "TrtmntlorMore"="factor", "N_start"="numeric",
"Proportion_Male"="numeric", "Mean_Age"="numeric", "Mean_daysweek"="numeric",
"Proportion_30days"="numeric", "Years_use"="numeric", "ASI_Drug"="numeric",
"TestPosScreen"="factor", "CokeFreeBase"="numeric", "CokeFreeWkl"="numeric",
"BaselineType"="factor", "CokeFreeStart"="numeric", "Complication"="character", "FU"="numeric",
"Complete"="numeric", "CokeFreeLastWk_NotITT"="numeric", "CokeFreeMean_NotITT"="numeric",
"CokeFreeLastWk_ITT"="numeric", "CokeFreeMean_ITT"="numeric", "CokeFreeOutcome_Type"="factor",
"CokeFreeOutcome_ITT"="numeric", "CFS"="numeric", "CPS"="numeric", "CFE"="numeric",
"CPE"="numeric", "yi"="numeric", "vi"="numeric"))

#Use this to output data types for the variables for testing
#print(str(mydata))

#Do analysis
#Other mods:
results<-rma(yi, vi,
  mods = ~ factor(Anticonvulsants) + factor(Antidepressants) + factor(Antipsychotics) +
factor(ContingencyManagement)
  + factor(DopamineAgonists) + factor(MiscMeds) + factor(Opioid) + factor(Other) +
factor(Placebo)
  + factor(Psychotherapy) + factor(Psychostimulants),
  data = mydata, method = "REML", measure = "OR")
print(results)

# close the output file
sink()
# unload the libraries
detach("package:gdata")
detach("package:metafor")
# change back to the original directory
setwd(initial.dir)
```

\*\*\*Output:

Mixed-Effects Model (k = 314; tau<sup>2</sup> estimator: REML)

```
tau2 (estimated amount of residual heterogeneity):      1.2715 (SE = 0.1555)
tau (square root of estimated tau2 value):           1.1276
```

I<sup>2</sup> (residual heterogeneity / unaccounted variability): 74.40%  
H<sup>2</sup> (unaccounted variability / sampling variability): 3.91  
R<sup>2</sup> (amount of heterogeneity accounted for): 29.22%

Test for Residual Heterogeneity:

QE(df = 302) = 962.0227, p-val < .0001

Test of Moderators (coefficient(s) 2,3,4,5,6,7,8,9,10,11,12):

QM(df = 11) = 89.5220, p-val < .0001

Model Results:

|                                | estimate | se     | zval    | pval   | ci.lb   | ci.ub  |     |
|--------------------------------|----------|--------|---------|--------|---------|--------|-----|
| intrcpt                        | -0.3339  | 0.2908 | -1.1483 | 0.2508 | -0.9038 | 0.2360 |     |
| factor(Anticonvulsants)1       | 0.7008   | 0.3849 | 1.8206  | 0.0687 | -0.0537 | 1.4553 | .   |
| factor(Antidepressants)1       | 1.3898   | 0.4212 | 3.2994  | 0.0010 | 0.5642  | 2.2155 | *** |
| factor(Antipsychotics)1        | -0.6881  | 0.4750 | -1.4486 | 0.1474 | -1.6191 | 0.2429 |     |
| factor(ContingencyManagement)1 | 0.6296   | 0.2128 | 2.9591  | 0.0031 | 0.2126  | 1.0466 | **  |
| factor(DopamineAgonists)1      | -0.0453  | 0.3656 | -0.1240 | 0.9014 | -0.7620 | 0.6713 |     |
| factor(MiscMeds)1              | 0.6824   | 0.2881 | 2.3687  | 0.0179 | 0.1177  | 1.2470 | *   |
| factor(Opioid)1                | 1.1518   | 0.1741 | 6.6154  | <.0001 | 0.8106  | 1.4931 | *** |
| factor(Other)1                 | 0.8896   | 0.3657 | 2.4328  | 0.0150 | 0.1729  | 1.6063 | *   |
| factor(Placebo)1               | 0.2931   | 0.2332 | 1.2569  | 0.2088 | -0.1639 | 0.7501 |     |
| factor(Psychotherapy)1         | -0.1917  | 0.2223 | -0.8625 | 0.3884 | -0.6273 | 0.2439 |     |
| factor(Psychostimulants)1      | 0.4786   | 0.3612 | 1.3252  | 0.1851 | -0.2293 | 1.1865 |     |

---

Signif. codes: 0 '\*\*\*' 0.001 '\*\*' 0.01 '\*' 0.05 '.' 0.1 ' ' 1

### \*\*\*Random-effects model, single-level, all covariates, with collinearity diagnostics\*\*\*

\*\*\*R script:

```
#Author: Brandon S Bentzley
#Project: Meta analysis of treatments for cocaine use disorders
#Date this R script was created: 2/20/2017
#Date this R script was last updated: 04/24/2018
#Description: This script uses rma() from the package metafor to calculate random effects with
treatment and other moderators.
#Note: Complete = Proportion of participants who completed the trial is currently commented out
with a #

# store the current directory
initial.dir<-getwd()
# change to the new directory
setwd("/Users/bsbentzley/Documents/Stanford/Malenka/2015.12.03 - DBS cocaine/Ranalysis")
# load the necessary libraries
library(gdata)
library(metafor)
library(mctest)
# set the output file
sink("Output.out")
options(width=120)
# load the dataset and define variable data types
mydata = read.csv("Data.csv", colClasses=c(
"Author"="character", "Year"="numeric", "Title"="character", "StudyID"="factor",
"Double_Blind"="factor", "Multisite"="factor", "Randomized"="factor", "SubDsrdr"="character",
"Placebo"="factor", "Psychotherapy"="factor", "ContingencyManagement"="factor", "Other"="factor",
"Opioid"="factor", "MiscMeds"="factor", "Psychostimulants"="factor", "Anticonvulsants"="factor",
"DopamineAgonists"="factor", "Antidepressants"="factor", "Antipsychotics"="factor",
"TreatmentNmbr"= "numeric", "TrtmntlorMore"="factor", "N_start"="numeric",
"Proportion_Male"="numeric", "Mean_Age"="numeric", "Mean_daysweek"="numeric",
"Proportion_30days"="numeric", "Years_use"="numeric", "ASI_Drug"="numeric",
"TestPosScreen"="factor", "CokeFreeBase"="numeric", "CokeFreeWkl"="numeric",
"BaselineType"="factor", "CokeFreeStart"="numeric", "Complication"="character", "FU"="numeric",
"Complete"="numeric", "CokeFreeLastWk_NotITT"="numeric", "CokeFreeMean_NotITT"="numeric",
"CokeFreeLastWk_ITT"="numeric", "CokeFreeMean_ITT"="numeric", "CokeFreeOutcome_Type"="factor",
"CokeFreeOutcome_ITT"="numeric", "CFS"="numeric", "CPS"="numeric", "CFE"="numeric",
"CPE"="numeric", "yi"="numeric", "vi"="numeric"))

#Do analysis
#Other mods:
results<-rma(yi, vi,
  mods = ~ factor(Anticonvulsants) + factor(Antidepressants) + factor(Antipsychotics)
  + factor(ContingencyManagement) + factor(DopamineAgonists) + factor(MiscMeds)
  + factor(Opioid) + factor(Other) + factor(Placebo)
  + factor(Psychotherapy) + factor(Psychostimulants)
  + factor(Double_Blind) + factor(Multisite) + factor(Randomized)
  + factor(BaselineType) + factor(CokeFreeOutcome_Type)
  + FU + Year + Proportion_Male + Mean_Age + Complete, #Complete included in 2nd output
  data = mydata, method = "REML", measure = "OR")
print(results)

#Calculte I2 http://www.metafor-project.org/doku.php/tips:i2\_multilevel\_multivariate
X <- model.matrix(results)
W <- diag(1/mydata$vi)
  #Only include rows with values (Not NAs)
  rowsInclude =as.numeric(row.names(X))
  W2=W[rowsInclude, rowsInclude]
P <- W2 - W2 %*% X %*% solve(t(X) %*% W2 %*% X) %*% t(X) %*% W2
Isquared <- 100 * results$tau2 / (results$tau2 + (results$k-results$p)/sum(diag(P)))
print(paste0("I2 = ", Isquared), quote = FALSE)

#Calc collinear
X <- X[,-c(1)] #for deleting columns; this takes out the intrcp=1 for all groups
Y <- mydata$yi
Y2=Y[rowsInclude] #only include data with outcomes
```



```
coldiag <- mctest(X, Y2, type="i") #perform colinearity diagnostics
print(coldiag)
```

```
# close the output file
sink()
closeAllConnections()
# unload the libraries
detach("package:gdata")
detach("package:metafor")
detach("package:mctest")
# change back to the original directory
setwd(initial.dir)
```

\*\*\*Output 1: (Without completion rate as covariate and collinearity diagnostics)

Mixed-Effects Model (k = 300; tau^2 estimator: REML)

```
tau^2 (estimated amount of residual heterogeneity):      0.3260 (SE = 0.0712)
tau (square root of estimated tau^2 value):             0.5709
I^2 (residual heterogeneity / unaccounted variability): 41.79%
H^2 (unaccounted variability / sampling variability):    1.72
R^2 (amount of heterogeneity accounted for):            80.62%
```

```
Test for Residual Heterogeneity:
QE(df = 276) = 470.0981, p-val < .0001
```

```
Test of Moderators (coefficient(s) 2,3,4,5,6,7,8,9,10,11,12,13,14,15,16,17,18,19,20,21,22,23,24):
QM(df = 23) = 420.2026, p-val < .0001
```

Model Results:

|                                | estimate | se      | zval     | pval   | ci.lb     | ci.ub    |     |
|--------------------------------|----------|---------|----------|--------|-----------|----------|-----|
| intrcpt                        | -77.2125 | 28.0742 | -2.7503  | 0.0060 | -132.2369 | -22.1882 | **  |
| factor(Anticonvulsants)1       | 0.7648   | 0.3246  | 2.3560   | 0.0185 | 0.1286    | 1.4010   | *   |
| factor(Antidepressants)1       | 0.4163   | 0.3638  | 1.1445   | 0.2524 | -0.2966   | 1.1293   |     |
| factor(Antipsychotics)1        | -0.3023  | 0.3889  | -0.7774  | 0.4369 | -1.0645   | 0.4599   |     |
| factor(ContingencyManagement)1 | 0.5649   | 0.1595  | 3.5406   | 0.0004 | 0.2522    | 0.8776   | *** |
| factor(DopamineAgonists)1      | 0.2358   | 0.3094  | 0.7622   | 0.4460 | -0.3706   | 0.8422   |     |
| factor(MiscMeds)1              | 0.4526   | 0.2776  | 1.6304   | 0.1030 | -0.0915   | 0.9967   |     |
| factor(Opioid)1                | 1.0543   | 0.1360  | 7.7533   | <.0001 | 0.7878    | 1.3208   | *** |
| factor(Other)1                 | 0.7482   | 0.2805  | 2.6677   | 0.0076 | 0.1985    | 1.2980   | **  |
| factor(Placebo)1               | 0.1735   | 0.2442  | 0.7104   | 0.4775 | -0.3052   | 0.6521   |     |
| factor(Psychotherapy)1         | -0.1550  | 0.1719  | -0.9019  | 0.3671 | -0.4918   | 0.1818   |     |
| factor(Psychostimulants)1      | 0.5343   | 0.3102  | 1.7227   | 0.0849 | -0.0736   | 1.1422   | .   |
| factor(Double_Blind)1          | -0.5472  | 0.2202  | -2.4846  | 0.0130 | -0.9789   | -0.1156  | *   |
| factor(Multisite)1             | -0.0527  | 0.1987  | -0.2651  | 0.7910 | -0.4421   | 0.3367   |     |
| factor(Randomized)1            | -0.1859  | 0.3823  | -0.4862  | 0.6268 | -0.9353   | 0.5635   |     |
| factor(BaselineType)2          | -2.2027  | 0.1690  | -13.0349 | <.0001 | -2.5339   | -1.8715  | *** |
| factor(BaselineType)3          | -2.3502  | 0.2156  | -10.9034 | <.0001 | -2.7727   | -1.9278  | *** |
| factor(CokeFreeOutcome_Type)2  | -0.4909  | 0.1526  | -3.2165  | 0.0013 | -0.7901   | -0.1918  | **  |
| factor(CokeFreeOutcome_Type)3  | -1.0311  | 0.2719  | -3.7921  | 0.0001 | -1.5640   | -0.4982  | *** |
| factor(CokeFreeOutcome_Type)4  | -0.4405  | 0.2113  | -2.0846  | 0.0371 | -0.8547   | -0.0263  | *   |
| FU                             | 0.0078   | 0.0109  | 0.7191   | 0.4721 | -0.0135   | 0.0291   |     |
| Year                           | 0.0390   | 0.0141  | 2.7657   | 0.0057 | 0.0114    | 0.0667   | **  |
| Proportion_Male                | 1.2896   | 0.4050  | 3.1845   | 0.0014 | 0.4959    | 2.0833   | **  |
| Mean_Age                       | 0.0076   | 0.0164  | 0.4661   | 0.6412 | -0.0244   | 0.0397   |     |

```
---
Signif. codes:  0 '***' 0.001 '**' 0.01 '*' 0.05 '.' 0.1 ' ' 1
```

```
[1] I2 = 41.7905199672199
```

```
Call:
imcdiag(x = x, y = y, method = method, corr = FALSE, vif = vif,
  tol = tol, conf = conf, cvif = cvif, leamer = leamer, all = all)
```

All Individual Multicollinearity Diagnostics Result

|                                | VIF    | TOL    | Wi      | Fi      | Leamer | CVIF   | Klein |
|--------------------------------|--------|--------|---------|---------|--------|--------|-------|
| factor(Anticonvulsants)1       | 1.7849 | 0.5603 | 9.8824  | 10.3903 | 0.7485 | 1.7776 | 0     |
| factor(Antidepressants)1       | 1.6124 | 0.6202 | 7.7103  | 8.1066  | 0.7875 | 1.6058 | 0     |
| factor(Antipsychotics)1        | 1.6230 | 0.6161 | 7.8446  | 8.2478  | 0.7849 | 1.6165 | 0     |
| factor(ContingencyManagement)1 | 1.4550 | 0.6873 | 5.7289  | 6.0234  | 0.8290 | 1.4491 | 0     |
| factor(DopamineAgonists)1      | 1.8983 | 0.5268 | 11.3100 | 11.8913 | 0.7258 | 1.8906 | 0     |
| factor(MiscMeds)1              | 2.6489 | 0.3775 | 20.7613 | 21.8284 | 0.6144 | 2.6382 | 1     |
| factor(Opioid)1                | 1.5834 | 0.6316 | 7.3452  | 7.7227  | 0.7947 | 1.5770 | 0     |
| factor(Other)1                 | 1.6085 | 0.6217 | 7.6612  | 8.0550  | 0.7885 | 1.6019 | 0     |
| factor(Placebo)1               | 3.7901 | 0.2638 | 35.1295 | 36.9352 | 0.5137 | 3.7747 | 1     |
| factor(Psychotherapy)1         | 1.3170 | 0.7593 | 3.9909  | 4.1961  | 0.8714 | 1.3116 | 0     |
| factor(Psychostimulants)1      | 1.9133 | 0.5227 | 11.4992 | 12.0903 | 0.7230 | 1.9055 | 0     |
| factor(Double_Blind)1          | 3.6602 | 0.2732 | 33.4946 | 35.2162 | 0.5227 | 3.6454 | 1     |
| factor(Multisite)1             | 1.3985 | 0.7150 | 5.0177  | 5.2756  | 0.8456 | 1.3928 | 0     |
| factor(Randomized)1            | 1.5271 | 0.6549 | 6.6361  | 6.9772  | 0.8092 | 1.5209 | 0     |
| factor(BaselineType)2          | 1.6795 | 0.5954 | 8.5552  | 8.9949  | 0.7716 | 1.6727 | 0     |
| factor(BaselineType)3          | 1.4615 | 0.6842 | 5.8106  | 6.1093  | 0.8272 | 1.4556 | 0     |
| factor(CokeFreeOutcome_Type)2  | 1.7800 | 0.5618 | 9.8205  | 10.3253 | 0.7495 | 1.7728 | 0     |
| factor(CokeFreeOutcome_Type)3  | 1.4339 | 0.6974 | 5.4635  | 5.7443  | 0.8351 | 1.4281 | 0     |
| factor(CokeFreeOutcome_Type)4  | 1.4448 | 0.6922 | 5.6001  | 5.8879  | 0.8320 | 1.4389 | 0     |
| FU                             | 1.2395 | 0.8068 | 3.0151  | 3.1701  | 0.8982 | 1.2344 | 0     |
| Year                           | 1.7177 | 0.5822 | 9.0363  | 9.5008  | 0.7630 | 1.7107 | 0     |
| Proportion_Male                | 1.4192 | 0.7046 | 5.2782  | 5.5495  | 0.8394 | 1.4135 | 0     |
| Mean_Age                       | 1.4301 | 0.6992 | 5.4156  | 5.6939  | 0.8362 | 1.4243 | 0     |

1 --> COLLINEARITY is detected by the test  
 0 --> COLLINEARITY is not detected by the test

factor(Antidepressants)1 , factor(Antipsychotics)1 , factor(DopamineAgonists)1 , factor(MiscMeds)1 , factor(Placebo)1 , factor(Psychotherapy)1 , factor(Psychostimulants)1 , factor(Multisite)1 , factor(Randomized)1 , factor(CokeFreeOutcome\_Type)2 , factor(CokeFreeOutcome\_Type)4 , FU , Mean\_Age , coefficient(s) are non-significant may be due to multicollinearity

R-square of y on all x: 0.5556

\* use method argument to check which regressors may be the reason of collinearity

\*\*\*Output 2: (With completion rate as covariate)

Mixed-Effects Model (k = 295; tau^2 estimator: REML)

tau^2 (estimated amount of residual heterogeneity): 0.1391 (SE = 0.0513)  
 tau (square root of estimated tau^2 value): 0.3730  
 I^2 (residual heterogeneity / unaccounted variability): 22.57%  
 H^2 (unaccounted variability / sampling variability): 1.29  
 R^2 (amount of heterogeneity accounted for): 91.49%

Test for Residual Heterogeneity:  
 QE(df = 270) = 360.8767, p-val = 0.0002

Test of Moderators (coefficient(s)  
 2,3,4,5,6,7,8,9,10,11,12,13,14,15,16,17,18,19,20,21,22,23,24,25):  
 QM(df = 24) = 576.4932, p-val < .0001

Model Results:

|                                | estimate | se      | zval    | pval   | ci.lb     | ci.ub   |     |
|--------------------------------|----------|---------|---------|--------|-----------|---------|-----|
| intrcpt                        | -52.8881 | 24.7395 | -2.1378 | 0.0325 | -101.3767 | -4.3996 | *   |
| factor(Anticonvulsants)1       | 0.5338   | 0.2861  | 1.8653  | 0.0621 | -0.0271   | 1.0946  | .   |
| factor(Antidepressants)1       | 0.6158   | 0.3296  | 1.8682  | 0.0617 | -0.0302   | 1.2617  | .   |
| factor(Antipsychotics)1        | 0.0121   | 0.3456  | 0.0349  | 0.9721 | -0.6652   | 0.6893  |     |
| factor(ContingencyManagement)1 | 0.6991   | 0.1429  | 4.8908  | <.0001 | 0.4189    | 0.9792  | *** |
| factor(DopamineAgonists)1      | 0.4971   | 0.2690  | 1.8481  | 0.0646 | -0.0301   | 1.0242  | .   |
| factor(MiscMeds)1              | 0.4015   | 0.2476  | 1.6218  | 0.1048 | -0.0837   | 0.8867  |     |
| factor(Opioid)1                | 0.3481   | 0.1438  | 2.4206  | 0.0155 | 0.0662    | 0.6300  | *   |
| factor(Other)1                 | 0.6760   | 0.2441  | 2.7687  | 0.0056 | 0.1975    | 1.1545  | **  |

|                               |         |        |          |        |         |         |     |
|-------------------------------|---------|--------|----------|--------|---------|---------|-----|
| factor(Placebo)1              | 0.2060  | 0.2131 | 0.9669   | 0.3336 | -0.2116 | 0.6236  |     |
| factor(Psychotherapy)1        | -0.1181 | 0.1482 | -0.7966  | 0.4257 | -0.4086 | 0.1725  |     |
| factor(Psychostimulants)1     | 0.6275  | 0.2710 | 2.3154   | 0.0206 | 0.0963  | 1.1587  | *   |
| factor(Double_Blind)1         | -0.2305 | 0.1947 | -1.1840  | 0.2364 | -0.6121 | 0.1511  |     |
| factor(Multisite)1            | -0.0085 | 0.1827 | -0.0466  | 0.9628 | -0.3665 | 0.3495  |     |
| factor(Randomized)1           | -0.5110 | 0.3358 | -1.5218  | 0.1281 | -1.1691 | 0.1471  |     |
| factor(BaselineType)2         | -2.2693 | 0.1560 | -14.5456 | <.0001 | -2.5751 | -1.9635 | *** |
| factor(BaselineType)3         | -2.5035 | 0.1940 | -12.9023 | <.0001 | -2.8838 | -2.1232 | *** |
| factor(CokeFreeOutcome_Type)2 | -0.1909 | 0.1393 | -1.3706  | 0.1705 | -0.4638 | 0.0821  |     |
| factor(CokeFreeOutcome_Type)3 | -0.7695 | 0.2614 | -2.9437  | 0.0032 | -1.2818 | -0.2572 | **  |
| factor(CokeFreeOutcome_Type)4 | -0.2304 | 0.1860 | -1.2392  | 0.2153 | -0.5949 | 0.1340  |     |
| FU                            | 0.0247  | 0.0098 | 2.5221   | 0.0117 | 0.0055  | 0.0438  | *   |
| Year                          | 0.0270  | 0.0124 | 2.1686   | 0.0301 | 0.0026  | 0.0514  | *   |
| Proportion_Male               | 0.8453  | 0.3701 | 2.2840   | 0.0224 | 0.1199  | 1.5706  | *   |
| Mean Age                      | -0.0284 | 0.0152 | -1.8648  | 0.0622 | -0.0583 | 0.0015  | .   |
| Complete                      | 2.5504  | 0.2836 | 8.9928   | <.0001 | 1.9946  | 3.1063  | *** |

---

Signif. codes: 0 '\*\*\*' 0.001 '\*\*' 0.01 '\*' 0.05 '.' 0.1 ' ' 1

[1] I2 = 22.5747638275299

### \*\*\*Random-effects model, multi-level, all covariates \*\*\*

\*\*\*R script:

```
#Author: Brandon S Bentzley
#Project: Meta analysis of treatments for cocaine use disorders
#Date this R script was created: 2/20/2017
#Date this R script was last updated: 06/04/2018
#Description: This script uses rma.mv() from the package metafor to calculate random effects with
treatment and other moderators. It also includes multilevel modeling with random effects grouped by
study individual study within lead author. It calculates I2, the intraclass correlational
coefficient (ICC), and makes various diagnostic plots (some stuff is commented out)
#Note: Complete = Proportion of participants who completed the trial is currently commented out
with a #

# store the current directory
initial.dir<-getwd()
# change to the new directory
setwd("/Users/bsbentzley/Documents/Stanford/Malenka/2015.12.03 - DBS cocaine/Ranalysis")
# load the necessary libraries
library(gdata)
library(metafor)
# set the output file
sink("Output.out")
# set file width
options(width=120)
# load the dataset and define variable data types
mydata = read.csv("data.csv", colClasses=c(
"Author"="character", "Year"="numeric", "Title"="character", "StudyID"="factor",
"Double_Blind"="factor", "Multisite"="factor", "Randomized"="factor", "SubDsrdr"="character",
"Placebo"="factor", "Psychotherapy"="factor", "ContingencyManagement"="factor", "Other"="factor",
"Opioid"="factor", "MiscMeds"="factor", "Psychostimulants"="factor", "Anticonvulsants"="factor",
"DopamineAgonists"="factor", "Antidepressants"="factor", "Antipsychotics"="factor",
"TreatmentNmbr"= "numeric", "TrtmntlorMore"="factor", "N_start"="numeric",
"Proportion_Male"="numeric", "Mean_Age"="numeric", "Mean_daysweek"="numeric",
"Proportion_30days"="numeric", "Years_use"="numeric", "ASI_Drug"="numeric",
"TestPosScreen"="factor", "CokeFreeBase"="numeric", "CokeFreeWk1"="numeric",
"BaselineType"="factor", "CokeFreeStart"="numeric", "Complication"="character", "FU"="numeric",
"Complete"="numeric", "CokeFreeLastWk_NotITT"="numeric", "CokeFreeMean_NotITT"="numeric",
"CokeFreeLastWk_ITT"="numeric", "CokeFreeMean_ITT"="numeric", "CokeFreeOutcome_Type"="factor",
"CokeFreeOutcome_ITT"="numeric", "CFS"="numeric", "CPS"="numeric", "CFE"="numeric",
"CPE"="numeric", "yi"="numeric", "vi"="numeric"))

#Do analysis (multilevel)
results<-rma.mv(yi, vi, random = ~ 1 | Author/StudyID,
  mods = ~ factor(Anticonvulsants) + factor(Antidepressants) + factor(Antipsychotics)
  + factor(ContingencyManagement) + factor(DopamineAgonists) + factor(MiscMeds)
  + factor(Opioid) + factor(Other) + factor(Placebo)
  + factor(Psychotherapy) + factor(Psychostimulants)
  + factor(Double_Blind) + factor(Multisite) + factor(Randomized)
  + factor(BaselineType) + factor(CokeFreeOutcome_Type)
  + FU + Year + Proportion_Male + Mean_Age, + Complete, #Complete in Output2 only
  data = mydata, method = "REML", measure = "OR")
print(results)

#Makes Profile Likelihood Plots of sigma2
par(mfrow=c(2,1))
profile(results, sigma2=1)
profile(results, sigma2=2)

#Calculate Intraclass Correlation of the True Effects
print(paste0("ICC = ", round(results$sigma2[1] / sum(results$sigma2), 3)), quote = FALSE)

#Calculate I2 http://www.metafor-project.org/doku.php/tips:i2\_multilevel\_multivariate
X <- model.matrix(results)
W <- diag(1/mydata$vi)
#Only include rows with values (Not NAs)
```

```

rowsInclude =as.numeric(row.names(X))
W2=W[rowsInclude, rowsInclude]
P <- W2 - W2 %*% X %*% solve(t(X) %*% W2 %*% X) %*% t(X) %*% W2
Isquared<-100 * sum(results$sigma2) / (sum(results$sigma2) + (results$k-results$p)/sum(diag(P)))
print(paste0("I2 = ", Isquared), quote = FALSE)

```

```

# close the output file
sink()
# unload the libraries
detach("package:gdata")
detach("package:metafor")
# change back to the original directory
setwd(initial.dir)

```

\*\*\*Output 1: (Without completion rate as a covariate)

Multivariate Meta-Analysis Model (k = 300; method: REML)

Variance Components:

|           | estim  | sqrt   | nlvls | fixed | factor         |
|-----------|--------|--------|-------|-------|----------------|
| sigma^2.1 | 0.3190 | 0.5648 | 75    | no    | Author         |
| sigma^2.2 | 0.3220 | 0.5675 | 114   | no    | Author/StudyID |

Test for Residual Heterogeneity:  
 QE(df = 276) = 470.0981, p-val < .0001

Test of Moderators (coefficient(s) 2,3,4,5,6,7,8,9,10,11,12,13,14,15,16,17,18,19,20,21,22,23,24):  
 QM(df = 23) = 172.8707, p-val < .0001

Model Results:

|                                | estimate | se      | zval    | pval   | ci.lb     | ci.ub   |     |
|--------------------------------|----------|---------|---------|--------|-----------|---------|-----|
| intrcpt                        | -79.1880 | 41.1179 | -1.9259 | 0.0541 | -159.7775 | 1.4015  | .   |
| factor(Anticonvulsants)1       | 0.8396   | 0.3579  | 2.3456  | 0.0190 | 0.1380    | 1.5411  | *   |
| factor(Antidepressants)1       | 0.6749   | 0.3934  | 1.7156  | 0.0862 | -0.0961   | 1.4459  | .   |
| factor(Antipsychotics)1        | 0.4645   | 0.4312  | 1.0772  | 0.2814 | -0.3807   | 1.3098  | .   |
| factor(ContingencyManagement)1 | 0.7388   | 0.1390  | 5.3153  | <.0001 | 0.4664    | 1.0112  | *** |
| factor(DopamineAgonists)1      | 0.4400   | 0.3359  | 1.3098  | 0.1903 | -0.2184   | 1.0983  | .   |
| factor(MiscMeds)1              | 0.4963   | 0.3181  | 1.5601  | 0.1187 | -0.1272   | 1.1199  | .   |
| factor(Opioid)1                | 0.8406   | 0.2093  | 4.0171  | <.0001 | 0.4305    | 1.2508  | *** |
| factor(Other)1                 | 0.7850   | 0.3663  | 2.1431  | 0.0321 | 0.0671    | 1.5029  | *   |
| factor(Placebo)1               | 0.3889   | 0.2743  | 1.4178  | 0.1563 | -0.1487   | 0.9265  | .   |
| factor(Psychotherapy)1         | 0.0737   | 0.1942  | 0.3795  | 0.7043 | -0.3069   | 0.4543  | .   |
| factor(Psychostimulants)1      | 0.9091   | 0.3422  | 2.6566  | 0.0079 | 0.2384    | 1.5799  | **  |
| factor(Double_Blind)1          | -0.7168  | 0.3183  | -2.2524 | 0.0243 | -1.3406   | -0.0931 | *   |
| factor(Multisite)1             | 0.2064   | 0.3063  | 0.6738  | 0.5004 | -0.3939   | 0.8067  | .   |
| factor(Randomized)1            | 0.2029   | 0.4590  | 0.4421  | 0.6584 | -0.6967   | 1.1026  | .   |
| factor(BaselineType)2          | -2.0780  | 0.2410  | -8.6226 | <.0001 | -2.5503   | -1.6057 | *** |
| factor(BaselineType)3          | -2.2036  | 0.3082  | -7.1506 | <.0001 | -2.8076   | -1.5996 | *** |
| factor(CokeFreeOutcome_Type)2  | -0.2724  | 0.2214  | -1.2301 | 0.2186 | -0.7064   | 0.1616  | .   |
| factor(CokeFreeOutcome_Type)3  | -0.9075  | 0.4483  | -2.0243 | 0.0429 | -1.7862   | -0.0288 | *   |
| factor(CokeFreeOutcome_Type)4  | -0.3042  | 0.3135  | -0.9704 | 0.3319 | -0.9187   | 0.3102  | .   |
| FU                             | 0.0149   | 0.0147  | 1.0189  | 0.3083 | -0.0138   | 0.0436  | .   |
| Year                           | 0.0402   | 0.0206  | 1.9501  | 0.0512 | -0.0002   | 0.0806  | .   |
| Proportion_Male                | 0.7181   | 0.4607  | 1.5589  | 0.1190 | -0.1848   | 1.6211  | .   |
| Mean_Age                       | -0.0115  | 0.0215  | -0.5366 | 0.5915 | -0.0537   | 0.0306  | .   |

---  
 Signif. codes: 0 '\*\*\*' 0.001 '\*\*' 0.01 '\*' 0.05 '.' 0.1 ' ' 1

[1] ICC = 0.498  
 [1] I2 = 58.5381289694449

Profile Plot for  $\sigma_1^2$

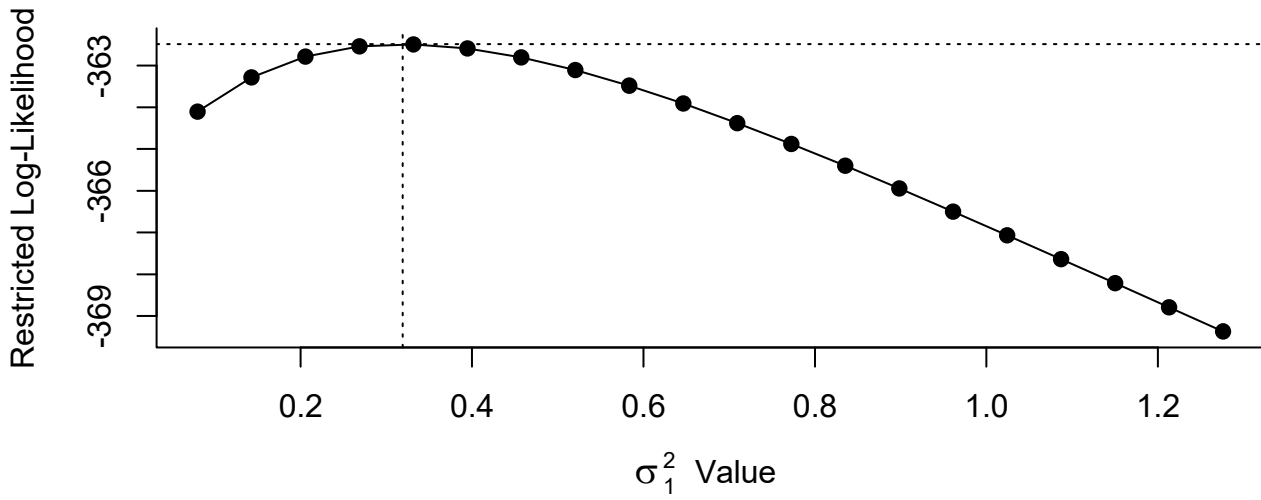

Profile Plot for  $\sigma_2^2$

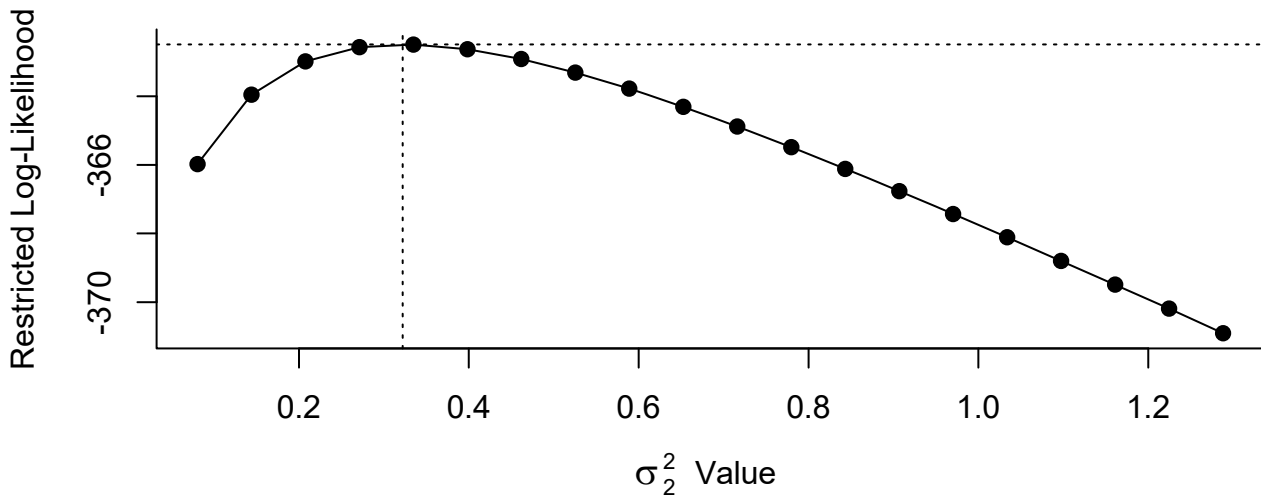

Output 2: (With completion rate as a covariate)

Multivariate Meta-Analysis Model (k = 295; method: REML)

Variance Components:

|           | estim  | sqrt   | nlvls | fixed | factor         |
|-----------|--------|--------|-------|-------|----------------|
| sigma^2.1 | 0.1826 | 0.4273 | 74    | no    | Author         |
| sigma^2.2 | 0.2833 | 0.5322 | 112   | no    | Author/StudyID |

Test for Residual Heterogeneity:

QE(df = 270) = 360.8767, p-val = 0.0002

Test of Moderators (coefficient(s)

2, 3, 4, 5, 6, 7, 8, 9, 10, 11, 12, 13, 14, 15, 16, 17, 18, 19, 20, 21, 22, 23, 24, 25):

QM(df = 24) = 249.5480, p-val < .0001

Model Results:

|                                | estimate | se      | zval    | pval   | ci.lb     | ci.ub   |     |
|--------------------------------|----------|---------|---------|--------|-----------|---------|-----|
| intrcpt                        | -51.6096 | 38.0420 | -1.3566 | 0.1749 | -126.1706 | 22.9514 |     |
| factor(Anticonvulsants)1       | 0.5118   | 0.3494  | 1.4648  | 0.1430 | -0.1730   | 1.1967  |     |
| factor(Antidepressants)1       | 0.5505   | 0.3834  | 1.4357  | 0.1511 | -0.2010   | 1.3020  |     |
| factor(Antipsychotics)1        | 0.1528   | 0.4180  | 0.3656  | 0.7146 | -0.6664   | 0.9721  |     |
| factor(ContingencyManagement)1 | 0.7218   | 0.1523  | 4.7393  | <.0001 | 0.4233    | 1.0203  | *** |
| factor(DopamineAgonists)1      | 0.2873   | 0.3260  | 0.8811  | 0.3782 | -0.3517   | 0.9263  |     |
| factor(MiscMeds)1              | 0.2407   | 0.3111  | 0.7738  | 0.4391 | -0.3690   | 0.8505  |     |
| factor(Opioid)1                | 0.2378   | 0.2123  | 1.1203  | 0.2626 | -0.1782   | 0.6538  |     |
| factor(Other)1                 | 0.3651   | 0.3559  | 1.0258  | 0.3050 | -0.3324   | 1.0625  |     |
| factor(Placebo)1               | 0.0880   | 0.2679  | 0.3284  | 0.7426 | -0.4371   | 0.6131  |     |
| factor(Psychotherapy)1         | -0.1259  | 0.1878  | -0.6704 | 0.5026 | -0.4939   | 0.2422  |     |
| factor(Psychostimulants)1      | 0.5854   | 0.3347  | 1.7489  | 0.0803 | -0.0706   | 1.2413  | .   |
| factor(Double_Blind)1          | -0.2368  | 0.3003  | -0.7885 | 0.4304 | -0.8254   | 0.3518  |     |
| factor(Multisite)1             | 0.0713   | 0.2989  | 0.2386  | 0.8114 | -0.5145   | 0.6572  |     |
| factor(Randomized)1            | -0.1088  | 0.4311  | -0.2523 | 0.8008 | -0.9537   | 0.7361  |     |
| factor(BaselineType)2          | -2.1771  | 0.2251  | -9.6730 | <.0001 | -2.6183   | -1.7360 | *** |
| factor(BaselineType)3          | -2.3125  | 0.2886  | -8.0139 | <.0001 | -2.8780   | -1.7469 | *** |
| factor(CokeFreeOutcome_Type)2  | 0.0147   | 0.2115  | 0.0697  | 0.9445 | -0.3998   | 0.4293  |     |
| factor(CokeFreeOutcome_Type)3  | -0.5449  | 0.4656  | -1.1702 | 0.2419 | -1.4575   | 0.3677  |     |
| factor(CokeFreeOutcome_Type)4  | -0.0839  | 0.2918  | -0.2877 | 0.7736 | -0.6559   | 0.4880  |     |
| Complete                       | 2.7488   | 0.3682  | 7.4647  | <.0001 | 2.0271    | 3.4705  | *** |
| FU                             | 0.0300   | 0.0143  | 2.1053  | 0.0353 | 0.0021    | 0.0580  | *   |
| Year                           | 0.0262   | 0.0191  | 1.3721  | 0.1700 | -0.0112   | 0.0636  |     |
| Proportion_Male                | 0.6879   | 0.4467  | 1.5399  | 0.1236 | -0.1877   | 1.5635  |     |
| Mean_Age                       | -0.0330  | 0.0207  | -1.5938 | 0.1110 | -0.0735   | 0.0076  |     |

---

Signif. codes: 0 '\*\*\*' 0.001 '\*\*' 0.01 '\*' 0.05 '.' 0.1 ' ' 1

[1] ICC = 0.392

[1] I2 = 49.3996299622723

Profile Plot for  $\sigma_1^2$

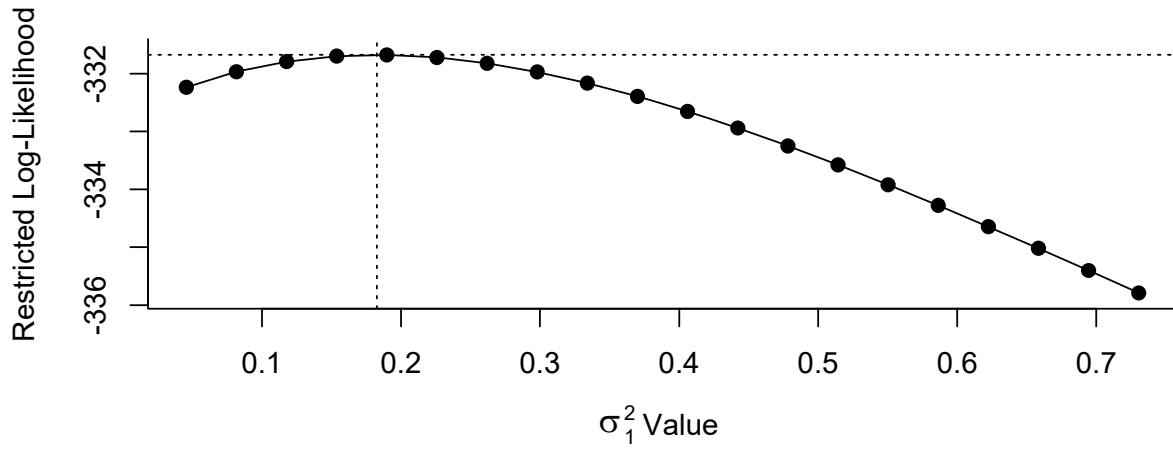

Profile Plot for  $\sigma_2^2$

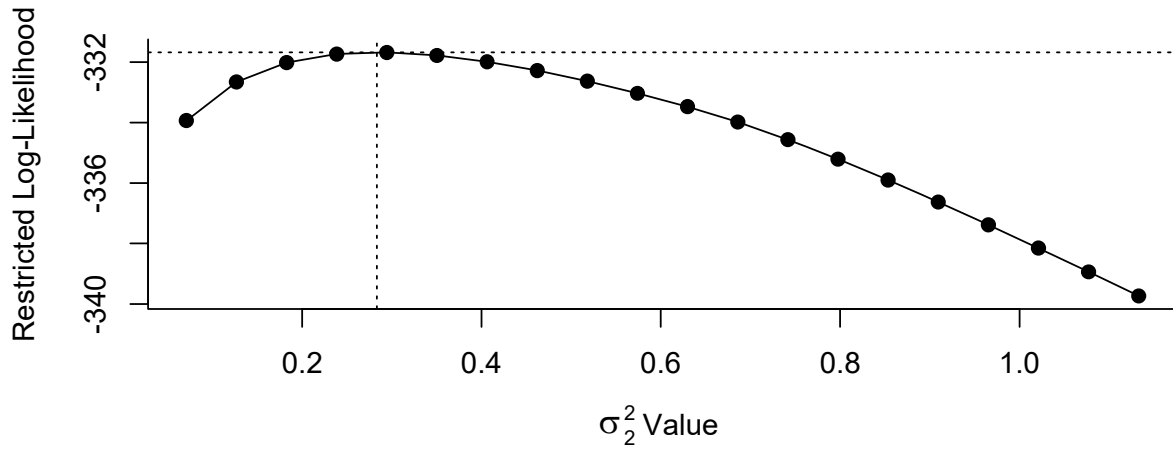



**\*\*\*Random-effects model, multi-level, all covariates, with imputed data \*\*\***

\*\*\*R script:

```
#Author: Brandon S Bentzley
#Project: Meta analysis of treatments for cocaine use disorders
#Date this R script was created: 04/06/2018
#Date this R script was last updated: 04/07/2018
#Description: Runs MICE to impute missing data to create 5 imputed data sets as .csv files

# store the current directory
initial.dir<-getwd()
# change to the new directory
setwd("/Users/bsbentzley/Documents/Stanford/Malenka/2015.12.03 - DBS cocaine/Ranalysis")
# load the necessary libraries
library(gdata)
library(metafor)
require(mice)
require(lattice)
# set the output file
sink("Output.out")
# set file width
options(width=500)
# load the dataset and define variable data types
mydata = read.csv("DataForImp.csv", colClasses=c(
"Author"="character", "Year"="numeric", "Title"="character", "StudyID"="factor",
"Double_Blind"="factor", "Multisite"="factor", "Randomized"="factor", "SubDsrdr"="character",
"Placebo"="factor", "Psychotherapy"="factor", "ContingencyManagement"="factor", "Other"="factor",
"Opioid"="factor", "MiscMeds"="factor", "Psychostimulants"="factor", "Anticonvulsants"="factor",
"DopamineAgonists"="factor", "Antidepressants"="factor", "Antipsychotics"="factor",
"TreatmentNmbr"= "numeric", "TrtmntlorMore"="factor", "N_start"="numeric",
"Proportion_Male"="numeric", "Mean_Age"="numeric", "Mean_daysweek"="numeric",
"Proportion_30days"="numeric", "Years_use"="numeric", "ASI_Drug"="numeric",
"TestPosScreen"="factor", "CokeFreeBase"="numeric", "CokeFreeWkl"="numeric",
"BaselineType"="factor", "CokeFreeStart"="numeric", "Complication"="character", "FU"="numeric",
"Complete"="numeric", "CokeFreeLastWk_NotITT"="numeric", "CokeFreeMean_NotITT"="numeric",
"CokeFreeLastWk_ITT"="numeric", "CokeFreeMean_ITT"="numeric", "CokeFreeOutcome_Type"="factor",
"CokeFreeOutcome_ITT"="numeric", "CFS"="numeric", "CPS"="numeric", "CFE"="numeric",
"CPE"="numeric"))

#Use this to output data types for the variables for testing
#print(str(mydata))

#MICE perform multiple imputation on Data set, 5 times, seed makes it reproducible
set.seed(123)
imp <- mice(mydata, m = 5, maxit = 5, seed = 123)

#Show imputation methods used
write.csv(imp$meth, file = "methods.csv")

#Write the imputed data sets to a long CSV file
write.csv(complete(imp, 'long'), file = "Data_imputed_long.csv")

# close the output file
sink()
# unload the libraries
detach("package:gdata")
detach("package:metafor")
# change back to the original directory
setwd(initial.dir)

#Author: Brandon S Bentzley
#Project: Meta-analysis of treatments for cocaine use disorders
#Date this R script was created: 04/06/2018
#Date this R script was last updated: 04/07/2018
#Description: Runs Escalc on 5 imputed data sets
```

```

# store the current directory
initial.dir<-getwd()
# change to the new directory
setwd("/Users/bsbentzley/Documents/Stanford/Malenka/2015.12.03 - DBS cocaine/Ranalysis")
# load the necessary libraries
library(gdata)
library(metafor)
require(mice)
require(lattice)
# set the output file
sink("Output.out")
# set file width
options(width=500)

#Run Escalc for 5 files
mydata = read.csv("Data_Imputed_1.csv")
mydata <- escalc(measure = "OR", ai = CFE, bi = CPE, ci = CFS, di = CPS, data = mydata, add = 1, to
= "only0", append = TRUE)
write.csv(mydata, file = "Data_Imputed_1_EC.csv")

mydata = read.csv("Data_Imputed_2.csv")
mydata <- escalc(measure = "OR", ai = CFE, bi = CPE, ci = CFS, di = CPS, data = mydata, add = 1, to
= "only0", append = TRUE)
write.csv(mydata, file = "Data_Imputed_2_EC.csv")

mydata = read.csv("Data_Imputed_3.csv")
mydata <- escalc(measure = "OR", ai = CFE, bi = CPE, ci = CFS, di = CPS, data = mydata, add = 1, to
= "only0", append = TRUE)
write.csv(mydata, file = "Data_Imputed_3_EC.csv")

mydata = read.csv("Data_Imputed_4.csv")
mydata <- escalc(measure = "OR", ai = CFE, bi = CPE, ci = CFS, di = CPS, data = mydata, add = 1, to
= "only0", append = TRUE)
write.csv(mydata, file = "Data_Imputed_4_EC.csv")

mydata = read.csv("Data_Imputed_5.csv")
mydata <- escalc(measure = "OR", ai = CFE, bi = CPE, ci = CFS, di = CPS, data = mydata, add = 1, to
= "only0", append = TRUE)
write.csv(mydata, file = "Data_Imputed_5_EC.csv")

# close the output file
sink()
# unload the libraries
detach("package:gdata")
detach("package:metafor")
# change back to the original directory
setwd(initial.dir)

#Author: Brandon S Bentzley
#Project: Meta-analysis of treatments for cocaine use disorders
#Date this R script was created: 04/06/2018
#Date this R script was last updated: 08/23/2018
#Description: Runs multilevel analysis using 5 imputed data sets, calculates I2 for each data set,
runs collinearity diagnostics on each imputed data set, reports pooled results, makes funnel plots

# store the current directory
initial.dir<-getwd()
# change to the new directory
setwd("/Users/bsbentzley/Documents/Stanford/Malenka/2015.12.03 - DBS cocaine/Ranalysis")
# load the necessary libraries
library(gdata)
library(metafor)
require(mice)
require(lattice)
library(mctest)

```

```

# set the output file
sink("Output.out")
# set file width
options(width=130)

#Build data frame from long combined CSV file of all imputations
mydata = read.csv("Data_imputed_long.csv", colClasses=c(
"Author"="character", "Year"="numeric", "Title"="character", "StudyID"="factor",
"Double_Blind"="factor", "Multisite"="factor", "Randomized"="factor", "SubDsrdr"="character",
"Placebo"="factor", "Psychotherapy"="factor", "ContingencyManagement"="factor", "Other"="factor",
"Opioid"="factor", "MiscMeds"="factor", "Psychostimulants"="factor", "Anticonvulsants"="factor",
"DopamineAgonists"="factor", "Antidepressants"="factor", "Antipsychotics"="factor",
"TreatmentNmbr"= "numeric", "TrtmntlorMore"="factor", "N_start"="numeric",
"Proportion_Male"="numeric", "Mean_Age"="numeric", "Mean_daysweek"="numeric",
"Years_use"="numeric", "ASI_Drug"="numeric", "BaselineType"="factor", "CokeFreeStart"="numeric",
"FU"="numeric", "Complete"="numeric", "CokeFreeOutcome_ITT"="numeric", "CFS"="numeric",
"CPS"="numeric", "CFE"="numeric", "CPE"="numeric", "yi"="numeric", "vi"="numeric"))

#Turn mydata into mids object
imp <- as.mids(mydata)

#Perform analysis on mids object and return as mira
fit <- with(imp, rma.mv(yi, vi, random = ~ 1 | Author/StudyID,
  mods = ~ factor(Anticonvulsants) + factor(Antidepressants) + factor(Antipsychotics)
  + factor(ContingencyManagement) + factor(DopamineAgonists) + factor(MiscMeds) + factor(Opioid)
  + factor(Other) + factor(Placebo) + factor(Psychotherapy) + factor(Psychostimulants)
  + factor(Double_Blind) + factor(Multisite) + factor(Randomized)
  + factor(BaselineType) + factor(CokeFreeOutcome_Type)
  + FU + Year + Proportion_Male + Mean_Age + Mean_daysweek + Years_use + ASI_Drug + Complete,
  method = "REML", measure = "OR"))

#Print all model results with calculated I2 and collinearity diagnostics

#Loop through all models
for (model_num in c(1:5)){

#Print results for model #
print(paste("Model",model_num,sep=""), quote = FALSE)
results <- getfit(fit, model_num)
print(results)

#Calc I2 for model #
dataframe <- complete(imp, model_num)
X <- model.matrix(results)
W <- diag(1/dataframe$vi)
  #Only include rows with values (Not NAs)
  rowsInclude =as.numeric(row.names(X))
  W2=W[rowsInclude, rowsInclude]
P <- W2 - W2 %*% X %*% solve(t(X) %*% W2 %*% X) %*% t(X) %*% W2
Isquared<-100 * sum(results$sigma2) / (sum(results$sigma2) + (results$k-results$p)/sum(diag(P)))
print(paste("Model", model_num, "I2 = ", Isquared, sep=""), quote = FALSE)
cat("\n")#new line

#Calc collinear for model #
X <- X[,-c(1)] #for deleting columns; this takes out the intrcp=1 for all groups
Y <- dataframe$yi
coldiag <- mctest(X, Y, type="i") #perform colinearity diagnostics
print(paste("Collinearity diagnostics for Model ", model_num, sep=""), quote = FALSE)
print(coldiag)
cat("\n") #new line

#Make PDF file for graphs
pdf(file=paste("Model_",model_num,"_Funnel_Imputed.pdf",sep=""), width=93.5/25.4, height=93.5/25.4)

#Font size
par(ps=8)

#Make funnel plot

```

```

funnel(results, level=c(90, 95, 99), digits=c(2,2), shade=c("white", "gray", "darkgray"),
atransf=exp, at=log(c(0.01, 0.1, 1, 10, 100)))

dev.off() #turn off PDF

} #End For Loop

#Pool the results and print them
print(paste0("Pooled Results"), quote = FALSE)
pool.fit <- pool(fit)
print(summary(pool.fit))

# close the output file
sink()
# unload the libraries
detach("package:gdata")
detach("package:metafor")
detach("package:mice")
detach("package:lattice")
detach("package:mctest")
# change back to the original directory
setwd(initial.dir)

```

Output 1: (Without completion rate as covariate)

[1] Modell1

Multivariate Meta-Analysis Model (k = 402; method: REML)

Variance Components:

|           | estim  | sqrt   | nlvls | fixed | factor         |
|-----------|--------|--------|-------|-------|----------------|
| sigma^2.1 | 0.7942 | 0.8912 | 98    | no    | Author         |
| sigma^2.2 | 0.9012 | 0.9493 | 157   | no    | Author/StudyID |

Test for Residual Heterogeneity:

QE(df = 375) = 1150.6193, p-val < .0001

Test of Moderators (coefficient(s)

2,3,4,5,6,7,8,9,10,11,12,13,14,15,16,17,18,19,20,21,22,23,24,25,26,27):

QM(df = 26) = 109.2886, p-val < .0001

Model Results:

|                                | estimate | se      | zval    | pval   | ci.lb     | ci.ub   |     |
|--------------------------------|----------|---------|---------|--------|-----------|---------|-----|
| intrcpt                        | -64.1216 | 45.9724 | -1.3948 | 0.1631 | -154.2258 | 25.9826 |     |
| factor(Anticonvulsants)1       | 0.6381   | 0.3589  | 1.7777  | 0.0755 | -0.0654   | 1.3416  | .   |
| factor(Antidepressants)1       | 0.3295   | 0.3952  | 0.8337  | 0.4045 | -0.4451   | 1.1040  |     |
| factor(Antipsychotics)1        | -0.0160  | 0.4451  | -0.0359 | 0.9713 | -0.8884   | 0.8565  |     |
| factor(ContingencyManagement)1 | 0.7748   | 0.1303  | 5.9450  | <.0001 | 0.5193    | 1.0302  | *** |
| factor(DopamineAgonists)1      | 0.2552   | 0.3513  | 0.7265  | 0.4675 | -0.4333   | 0.9438  |     |
| factor(MiscMeds)1              | 0.3300   | 0.3142  | 1.0506  | 0.2934 | -0.2857   | 0.9458  |     |
| factor(Opioid)1                | 0.5405   | 0.2637  | 2.0498  | 0.0404 | 0.0237    | 1.0573  | *   |
| factor(Other)1                 | 0.2946   | 0.3427  | 0.8596  | 0.3900 | -0.3771   | 0.9663  |     |
| factor(Placebo)1               | 0.1647   | 0.2822  | 0.5838  | 0.5593 | -0.3883   | 0.7178  |     |
| factor(Psychotherapy)1         | 0.1505   | 0.2028  | 0.7418  | 0.4582 | -0.2471   | 0.5480  |     |
| factor(Psychostimulants)1      | 0.8638   | 0.3393  | 2.5457  | 0.0109 | 0.1987    | 1.5288  | *   |
| factor(Double_Blind)1          | -0.7054  | 0.3626  | -1.9455 | 0.0517 | -1.4161   | 0.0052  | .   |
| factor(Multisite)1             | 0.3496   | 0.3797  | 0.9206  | 0.3573 | -0.3947   | 1.0939  |     |
| factor(Randomized)1            | 0.2495   | 0.4388  | 0.5685  | 0.5697 | -0.6106   | 1.1096  |     |
| factor(BaselineType)2          | -1.1135  | 0.2646  | -4.2076 | <.0001 | -1.6322   | -0.5948 | *** |
| factor(BaselineType)3          | 0.1027   | 0.2551  | 0.4026  | 0.6872 | -0.3972   | 0.6026  |     |
| factor(CokeFreeOutcome_Type)2  | 0.1633   | 0.3100  | 0.5268  | 0.5984 | -0.4442   | 0.7708  |     |
| factor(CokeFreeOutcome_Type)3  | -0.0682  | 0.5105  | -0.1335 | 0.8938 | -1.0686   | 0.9323  |     |
| factor(CokeFreeOutcome_Type)4  | 0.4616   | 0.3397  | 1.3587  | 0.1742 | -0.2042   | 1.1274  |     |

|                 |         |        |         |        |         |        |   |
|-----------------|---------|--------|---------|--------|---------|--------|---|
| FU              | 0.0295  | 0.0129 | 2.2935  | 0.0218 | 0.0043  | 0.0548 | * |
| Year            | 0.0320  | 0.0231 | 1.3854  | 0.1659 | -0.0133 | 0.0772 |   |
| Proportion_Male | 1.0443  | 0.4539 | 2.3009  | 0.0214 | 0.1547  | 1.9338 | * |
| Mean_Age        | -0.0049 | 0.0232 | -0.2125 | 0.8317 | -0.0503 | 0.0405 |   |
| Mean_daysweek   | 0.0438  | 0.0650 | 0.6734  | 0.5007 | -0.0836 | 0.1712 |   |
| Years_use       | -0.0030 | 0.0215 | -0.1391 | 0.8894 | -0.0451 | 0.0391 |   |
| ASI_Drug        | -0.6410 | 0.5890 | -1.0884 | 0.2764 | -1.7955 | 0.5134 |   |

---

Signif. codes: 0 '\*\*\*' 0.001 '\*\*' 0.01 '\*' 0.05 '.' 0.1 ' ' 1

[1] ICC = 0.468  
 [1] ModellI2 = 76.7166905524325

[1] Collinearity diagnostics for Model 1

Call:  
 imcdiag(x = x, y = y, method = method, corr = FALSE, vif = vif,  
 tol = tol, conf = conf, cvif = cvif, leamer = leamer, all = all)

All Individual Multicollinearity Diagnostics Result

|                                | VIF    | TOL    | Wi      | Fi      | Leamer | CVIF   | Klein |
|--------------------------------|--------|--------|---------|---------|--------|--------|-------|
| factor(Anticonvulsants)1       | 1.4714 | 0.6796 | 7.0906  | 7.4057  | 0.8244 | 1.8481 | 0     |
| factor(Antidepressants)1       | 1.4544 | 0.6876 | 6.8346  | 7.1383  | 0.8292 | 1.8267 | 0     |
| factor(Antipsychotics)1        | 1.3824 | 0.7234 | 5.7509  | 6.0065  | 0.8505 | 1.7362 | 0     |
| factor(ContingencyManagement)1 | 1.3664 | 0.7319 | 5.5105  | 5.7554  | 0.8555 | 1.7161 | 0     |
| factor(DopamineAgonists)1      | 1.5736 | 0.6355 | 8.6271  | 9.0105  | 0.7972 | 1.9764 | 0     |
| factor(MiscMeds)1              | 2.1914 | 0.4563 | 17.9183 | 18.7145 | 0.6755 | 2.7523 | 1     |
| factor(Opioid)1                | 1.8416 | 0.5430 | 12.6582 | 13.2207 | 0.7369 | 2.3130 | 1     |
| factor(Other)1                 | 1.4842 | 0.6737 | 7.2830  | 7.6066  | 0.8208 | 1.8642 | 0     |
| factor(Placebo)1               | 3.0118 | 0.3320 | 30.2570 | 31.6015 | 0.5762 | 3.7827 | 1     |
| factor(Psychotherapy)1         | 1.3753 | 0.7271 | 5.6445  | 5.8953  | 0.8527 | 1.7273 | 0     |
| factor(Psychostimulants)1      | 1.4975 | 0.6678 | 7.4823  | 7.8148  | 0.8172 | 1.8808 | 0     |
| factor(Double_Blind)1          | 3.2377 | 0.3089 | 33.6552 | 35.1507 | 0.5558 | 4.0665 | 1     |
| factor(Multisite)1             | 1.2803 | 0.7811 | 4.2158  | 4.4031  | 0.8838 | 1.6080 | 0     |
| factor(Randomized)1            | 1.3837 | 0.7227 | 5.7701  | 6.0265  | 0.8501 | 1.7378 | 0     |
| factor(BaselineType)2          | 1.9469 | 0.5136 | 14.2417 | 14.8745 | 0.7167 | 2.4453 | 1     |
| factor(BaselineType)3          | 1.8524 | 0.5398 | 12.8202 | 13.3898 | 0.7347 | 2.3266 | 1     |
| factor(CokeFreeOutcome_Type)2  | 2.1671 | 0.4614 | 17.5532 | 18.3332 | 0.6793 | 2.7218 | 1     |
| factor(CokeFreeOutcome_Type)3  | 1.3123 | 0.7620 | 4.6969  | 4.9056  | 0.8729 | 1.6482 | 0     |
| factor(CokeFreeOutcome_Type)4  | 1.9311 | 0.5179 | 14.0031 | 14.6253 | 0.7196 | 2.4253 | 1     |
| FU                             | 1.2264 | 0.8154 | 3.4058  | 3.5571  | 0.9030 | 1.5404 | 0     |
| Year                           | 1.5038 | 0.6650 | 7.5779  | 7.9146  | 0.8155 | 1.8888 | 0     |
| Proportion_Male                | 1.4701 | 0.6802 | 7.0704  | 7.3846  | 0.8248 | 1.8464 | 0     |
| Mean_Age                       | 1.4746 | 0.6782 | 7.1376  | 7.4547  | 0.8235 | 1.8520 | 0     |
| Mean_daysweek                  | 1.3890 | 0.7199 | 5.8506  | 6.1106  | 0.8485 | 1.7445 | 0     |
| Years_use                      | 1.4529 | 0.6883 | 6.8112  | 7.1139  | 0.8296 | 1.8248 | 0     |
| ASI_Drug                       | 1.6284 | 0.6141 | 9.4508  | 9.8707  | 0.7837 | 2.0452 | 1     |

1 --> COLLINEARITY is detected by the test  
 0 --> COLLINEARITY is not detected by the test

factor(Anticonvulsants)1 , factor(Antidepressants)1 , factor(Antipsychotics)1 ,  
 factor(ContingencyManagement)1 , factor(DopamineAgonists)1 , factor(MiscMeds)1 , factor(Other)1 ,  
 factor(Placebo)1 , factor(Psychotherapy)1 , factor(Psychostimulants)1 , factor(Multisite)1 ,  
 factor(Randomized)1 , factor(CokeFreeOutcome\_Type)2 , factor(CokeFreeOutcome\_Type)3 ,  
 factor(CokeFreeOutcome\_Type)4 , Mean\_Age , Mean\_daysweek , Years\_use , ASI\_Drug , coefficient(s)  
 are non-significant may be due to multicollinearity

R-square of y on all x: 0.3712

\* use method argument to check which regressors may be the reason of collinearity  
 =====

[1] Model2

Multivariate Meta-Analysis Model (k = 402; method: REML)

Variance Components:

|           | estim  | sqrt   | nlvls | fixed | factor         |
|-----------|--------|--------|-------|-------|----------------|
| sigma^2.1 | 0.7885 | 0.8880 | 98    | no    | Author         |
| sigma^2.2 | 0.5092 | 0.7136 | 157   | no    | Author/StudyID |

Test for Residual Heterogeneity:  
 QE(df = 375) = 1056.8754, p-val < .0001

Test of Moderators (coefficient(s)  
 2,3,4,5,6,7,8,9,10,11,12,13,14,15,16,17,18,19,20,21,22,23,24,25,26,27) :  
 QM(df = 26) = 224.3326, p-val < .0001

Model Results:

|                                | estimate | se      | zval    | pval   | ci.lb     | ci.ub   |     |
|--------------------------------|----------|---------|---------|--------|-----------|---------|-----|
| intrcpt                        | -51.5233 | 40.1224 | -1.2842 | 0.1991 | -130.1618 | 27.1151 |     |
| factor(Anticonvulsants)1       | 0.0356   | 0.3259  | 0.1093  | 0.9130 | -0.6031   | 0.6743  |     |
| factor(Antidepressants)1       | 0.3043   | 0.3645  | 0.8348  | 0.4038 | -0.4102   | 1.0188  |     |
| factor(Antipsychotics)1        | 0.2369   | 0.3934  | 0.6022  | 0.5470 | -0.5341   | 1.0078  |     |
| factor(ContingencyManagement)1 | 0.6994   | 0.1166  | 6.0000  | <.0001 | 0.4709    | 0.9278  | *** |
| factor(DopamineAgonists)1      | -0.0170  | 0.3239  | -0.0524 | 0.9582 | -0.6519   | 0.6179  |     |
| factor(MiscMeds)1              | 0.0464   | 0.2842  | 0.1633  | 0.8703 | -0.5107   | 0.6035  |     |
| factor(Opioid)1                | 0.4609   | 0.2371  | 1.9445  | 0.0518 | -0.0037   | 0.9256  |     |
| factor(Other)1                 | 0.3778   | 0.3004  | 1.2574  | 0.2086 | -0.2111   | 0.9666  |     |
| factor(Placebo)1               | 0.0514   | 0.2575  | 0.1994  | 0.8419 | -0.4533   | 0.5560  |     |
| factor(Psychotherapy)1         | 0.2310   | 0.1748  | 1.3215  | 0.1863 | -0.1116   | 0.5735  |     |
| factor(Psychostimulants)1      | 0.4601   | 0.3114  | 1.4776  | 0.1395 | -0.1502   | 1.0705  |     |
| factor(Double_Blind)1          | -0.0499  | 0.3043  | -0.1641 | 0.8696 | -0.6463   | 0.5464  |     |
| factor(Multisite)1             | 0.3000   | 0.3285  | 0.9133  | 0.3611 | -0.3439   | 0.9439  |     |
| factor(Randomized)1            | 0.4648   | 0.3790  | 1.2262  | 0.2201 | -0.2781   | 1.2077  |     |
| factor(BaselineType)2          | -1.5385  | 0.2137  | -7.2007 | <.0001 | -1.9573   | -1.1197 | *** |
| factor(BaselineType)3          | -1.9259  | 0.2050  | -9.3926 | <.0001 | -2.3278   | -1.5240 | *** |
| factor(CokeFreeOutcome_Type)2  | -0.5466  | 0.2509  | -2.1788 | 0.0293 | -1.0382   | -0.0549 | *   |
| factor(CokeFreeOutcome_Type)3  | -1.6466  | 0.4406  | -3.7371 | 0.0002 | -2.5102   | -0.7830 | *** |
| factor(CokeFreeOutcome_Type)4  | -1.3996  | 0.3117  | -4.4902 | <.0001 | -2.0105   | -0.7887 | *** |
| FU                             | 0.0109   | 0.0104  | 1.0455  | 0.2958 | -0.0095   | 0.0312  |     |
| Year                           | 0.0259   | 0.0202  | 1.2809  | 0.2002 | -0.0137   | 0.0654  |     |
| Proportion_Male                | 0.6477   | 0.4061  | 1.5949  | 0.1107 | -0.1482   | 1.4436  |     |
| Mean_Age                       | 0.0052   | 0.0214  | 0.2434  | 0.8077 | -0.0367   | 0.0472  |     |
| Mean_daysweek                  | 0.0169   | 0.0621  | 0.2723  | 0.7854 | -0.1048   | 0.1386  |     |
| Years_use                      | 0.0075   | 0.0194  | 0.3863  | 0.6993 | -0.0306   | 0.0456  |     |
| ASI_Drug                       | -0.0953  | 0.5300  | -0.1798 | 0.8573 | -1.1340   | 0.9435  |     |

---  
 Signif. codes: 0 '\*\*\*' 0.001 '\*\*' 0.01 '\*' 0.05 '.' 0.1 ' ' 1

[1] ICC = 0.608  
 [1] ModelI2 = 75.2205556421797

[1] Collinearity diagnostics for Model 2

Call:  
 imcdiag(x = x, y = y, method = method, corr = FALSE, vif = vif,  
 tol = tol, conf = conf, cvif = cvif, leamer = leamer, all = all)

All Individual Multicollinearity Diagnostics Result

|                                | VIF    | TOL    | Wi      | Fi      | Leamer | CVIF   | Klein |
|--------------------------------|--------|--------|---------|---------|--------|--------|-------|
| factor(Anticonvulsants)1       | 1.4791 | 0.6761 | 7.2053  | 7.5255  | 0.8223 | 1.3867 | 0     |
| factor(Antidepressants)1       | 1.4268 | 0.7009 | 6.4184  | 6.7036  | 0.8372 | 1.3376 | 0     |
| factor(Antipsychotics)1        | 1.3826 | 0.7233 | 5.7536  | 6.0093  | 0.8505 | 1.2962 | 0     |
| factor(ContingencyManagement)1 | 1.3546 | 0.7382 | 5.3337  | 5.5708  | 0.8592 | 1.2700 | 0     |
| factor(DopamineAgonists)1      | 1.5980 | 0.6258 | 8.9941  | 9.3937  | 0.7911 | 1.4982 | 0     |
| factor(MiscMeds)1              | 2.1834 | 0.4580 | 17.7980 | 18.5889 | 0.6768 | 2.0470 | 1     |
| factor(Opioid)1                | 2.0332 | 0.4918 | 15.5389 | 16.2294 | 0.7013 | 1.9061 | 1     |
| factor(Other)1                 | 1.4681 | 0.6812 | 7.0400  | 7.3529  | 0.8253 | 1.3764 | 0     |

```

factor(Placebo)1          3.0028 0.3330 30.1219 31.4604 0.5771 2.8152 1
factor(Psychotherapy)1   1.3470 0.7424  5.2184  5.4503 0.8616 1.2628 0
factor(Psychostimulants)1 1.4812 0.6751  7.2375  7.5592 0.8217 1.3887 0
factor(Double_Blind)1     2.9449 0.3396 29.2507 30.5506 0.5827 2.7609 1
factor(Multisite)1       1.3926 0.7181  5.9050  6.1674 0.8474 1.3056 0
factor(Randomized)1      1.4196 0.7044  6.3105  6.5909 0.8393 1.3309 0
factor(BaselineType)2    1.9273 0.5189 13.9465 14.5663 0.7203 1.8069 1
factor(BaselineType)3    1.6994 0.5884 10.5191 10.9866 0.7671 1.5932 0
factor(CokeFreeOutcome_Type)2 2.0547 0.4867 15.8621 16.5669 0.6976 1.9263 1
factor(CokeFreeOutcome_Type)3 1.5000 0.6667  7.5193  7.8534 0.8165 1.4062 0
factor(CokeFreeOutcome_Type)4 2.4749 0.4041 22.1820 23.1677 0.6357 2.3202 1
FU                        1.2613 0.7929  3.9293  4.1039 0.8904 1.1825 0
Year                      1.5466 0.6466  8.2210  8.5863 0.8041 1.4500 0
Proportion_Male          1.5213 0.6573  7.8403  8.1887 0.8108 1.4263 0
Mean_Age                 1.6431 0.6086  9.6725 10.1023 0.7801 1.5405 0
Mean_daysweek            1.4602 0.6848  6.9218  7.2294 0.8275 1.3690 0
Years_use                1.8347 0.5450 12.5538 13.1117 0.7383 1.7201 0
ASI_Drug                 1.8421 0.5428 12.6658 13.2286 0.7368 1.7271 0

```

```

1 --> COLLINEARITY is detected by the test
0 --> COLLINEARITY is not detected by the test

```

```

factor(Anticonvulsants)1 , factor(Antidepressants)1 , factor(Antipsychotics)1 ,
factor(DopamineAgonists)1 , factor(MiscMeds)1 , factor(Placebo)1 , factor(Psychotherapy)1 ,
factor(Psychostimulants)1 , factor(Double_Blind)1 , factor(Multisite)1 , factor(Randomized)1 , FU ,
Mean_Age , Mean_daysweek , Years_use , ASI_Drug , coefficient(s) are non-significant may be due to
multicollinearity

```

R-square of y on all x: 0.4764

```

* use method argument to check which regressors may be the reason of collinearity
=====

```

```
[1] Model3
```

Multivariate Meta-Analysis Model (k = 402; method: REML)

Variance Components:

```

      estim  sqrt  nlvls  fixed      factor
sigma^2.1  0.7224  0.8499   98    no      Author
sigma^2.2  0.5227  0.7230  157    no  Author/StudyID

```

```

Test for Residual Heterogeneity:
QE(df = 375) = 1033.4830, p-val < .0001

```

```

Test of Moderators (coefficient(s)
2,3,4,5,6,7,8,9,10,11,12,13,14,15,16,17,18,19,20,21,22,23,24,25,26,27):
QM(df = 26) = 182.9648, p-val < .0001

```

Model Results:

|                                | estimate | se      | zval    | pval   | ci.lb    | ci.ub   |     |
|--------------------------------|----------|---------|---------|--------|----------|---------|-----|
| intrcpt                        | -16.5344 | 39.5260 | -0.4183 | 0.6757 | -94.0039 | 60.9351 |     |
| factor(Anticonvulsants)1       | 0.3824   | 0.3239  | 1.1807  | 0.2377 | -0.2524  | 1.0173  |     |
| factor(Antidepressants)1       | 0.1941   | 0.3515  | 0.5520  | 0.5809 | -0.4950  | 0.8831  |     |
| factor(Antipsychotics)1        | 0.0704   | 0.3922  | 0.1796  | 0.8575 | -0.6983  | 0.8392  |     |
| factor(ContingencyManagement)1 | 0.8235   | 0.1148  | 7.1739  | <.0001 | 0.5985   | 1.0485  | *** |
| factor(DopamineAgonists)1      | 0.0415   | 0.3188  | 0.1301  | 0.8965 | -0.5834  | 0.6663  |     |
| factor(MiscMeds)1              | 0.1680   | 0.2794  | 0.6012  | 0.5477 | -0.3797  | 0.7156  |     |
| factor(Opioid)1                | 0.6187   | 0.2219  | 2.7884  | 0.0053 | 0.1838   | 1.0536  | **  |
| factor(Other)1                 | 0.2808   | 0.2983  | 0.9414  | 0.3465 | -0.3038  | 0.8655  |     |
| factor(Placebo)1               | 0.0392   | 0.2513  | 0.1561  | 0.8759 | -0.4533  | 0.5318  |     |
| factor(Psychotherapy)1         | 0.1277   | 0.1748  | 0.7307  | 0.4649 | -0.2148  | 0.4703  |     |
| factor(Psychostimulants)1      | 0.3980   | 0.3063  | 1.2994  | 0.1938 | -0.2024  | 0.9984  |     |
| factor(Double_Blind)1          | -0.3986  | 0.2988  | -1.3337 | 0.1823 | -0.9843  | 0.1871  |     |
| factor(Multisite)1             | 0.3555   | 0.3187  | 1.1155  | 0.2646 | -0.2691  | 0.9800  |     |
| factor(Randomized)1            | 0.3244   | 0.3748  | 0.8656  | 0.3867 | -0.4102  | 1.0590  |     |
| factor(BaselineType)2          | -1.1621  | 0.2206  | -5.2675 | <.0001 | -1.5945  | -0.7297 | *** |

|                               |         |        |         |        |         |         |     |
|-------------------------------|---------|--------|---------|--------|---------|---------|-----|
| factor(BaselineType)3         | -1.2667 | 0.2037 | -6.2199 | <.0001 | -1.6659 | -0.8676 | *** |
| factor(CokeFreeOutcome_Type)2 | -0.5263 | 0.2466 | -2.1338 | 0.0329 | -1.0096 | -0.0429 | *   |
| factor(CokeFreeOutcome_Type)3 | -1.6218 | 0.4636 | -3.4983 | 0.0005 | -2.5304 | -0.7132 | *** |
| factor(CokeFreeOutcome_Type)4 | -1.5978 | 0.2969 | -5.3810 | <.0001 | -2.1798 | -1.0158 | *** |
| FU                            | 0.0173  | 0.0102 | 1.6969  | 0.0897 | -0.0027 | 0.0374  | .   |
| Year                          | 0.0076  | 0.0199 | 0.3839  | 0.7011 | -0.0313 | 0.0466  | .   |
| Proportion_Male               | 1.0586  | 0.4049 | 2.6145  | 0.0089 | 0.2650  | 1.8521  | **  |
| Mean_Age                      | 0.0277  | 0.0212 | 1.3080  | 0.1909 | -0.0138 | 0.0692  | .   |
| Mean_daysweek                 | 0.1330  | 0.0617 | 2.1574  | 0.0310 | 0.0122  | 0.2539  | *   |
| Years_use                     | 0.0154  | 0.0200 | 0.7705  | 0.4410 | -0.0238 | 0.0546  | .   |
| ASI_Drug                      | -0.5393 | 0.4576 | -1.1784 | 0.2386 | -1.4362 | 0.3577  | .   |

---

Signif. codes: 0 '\*\*\*' 0.001 '\*\*' 0.01 '\*' 0.05 '.' 0.1 ' ' 1

[1] ICC = 0.58

[1] Model3I2 = 74.9574674457457

[1] Collinearity diagnostics for Model 3

Call:

```
imcdiag(x = x, y = y, method = method, corr = FALSE, vif = vif,
        tol = tol, conf = conf, cvif = cvif, leamer = leamer, all = all)
```

All Individual Multicollinearity Diagnostics Result

|                                | VIF    | TOL    | Wi      | Fi      | Leamer | CVIF   | Klein |
|--------------------------------|--------|--------|---------|---------|--------|--------|-------|
| factor(Anticonvulsants)1       | 1.4736 | 0.6786 | 7.1228  | 7.4393  | 0.8238 | 1.7449 | 0     |
| factor(Antidepressants)1       | 1.4418 | 0.6936 | 6.6448  | 6.9400  | 0.8328 | 1.7072 | 0     |
| factor(Antipsychotics)1        | 1.4228 | 0.7029 | 6.3584  | 6.6410  | 0.8384 | 1.6847 | 0     |
| factor(ContingencyManagement)1 | 1.3709 | 0.7294 | 5.5791  | 5.8270  | 0.8541 | 1.6233 | 0     |
| factor(DopamineAgonists)1      | 1.5848 | 0.6310 | 8.7959  | 9.1867  | 0.7943 | 1.8766 | 0     |
| factor(MiscMeds)1              | 2.1846 | 0.4577 | 17.8170 | 18.6088 | 0.6766 | 2.5868 | 1     |
| factor(Opioid)1                | 1.6472 | 0.6071 | 9.7344  | 10.1669 | 0.7792 | 1.9505 | 0     |
| factor(Other)1                 | 1.4481 | 0.6905 | 6.7400  | 7.0395  | 0.8310 | 1.7147 | 0     |
| factor(Placebo)1               | 3.0292 | 0.3301 | 30.5198 | 31.8760 | 0.5746 | 3.5869 | 1     |
| factor(Psychotherapy)1         | 1.3860 | 0.7215 | 5.8050  | 6.0630  | 0.8494 | 1.6411 | 0     |
| factor(Psychostimulants)1      | 1.4983 | 0.6674 | 7.4950  | 7.8281  | 0.8169 | 1.7742 | 0     |
| factor(Double_Blind)1          | 3.1619 | 0.3163 | 32.5152 | 33.9601 | 0.5624 | 3.7440 | 1     |
| factor(Multisite)1             | 1.3666 | 0.7318 | 5.5130  | 5.7580  | 0.8554 | 1.6181 | 0     |
| factor(Randomized)1            | 1.4004 | 0.7141 | 6.0217  | 6.2893  | 0.8450 | 1.6582 | 0     |
| factor(BaselineType)2          | 1.9988 | 0.5003 | 15.0220 | 15.6895 | 0.7073 | 2.3668 | 0     |
| factor(BaselineType)3          | 2.0102 | 0.4975 | 15.1935 | 15.8687 | 0.7053 | 2.3803 | 0     |
| factor(CokeFreeOutcome_Type)2  | 1.9675 | 0.5083 | 14.5517 | 15.1983 | 0.7129 | 2.3297 | 0     |
| factor(CokeFreeOutcome_Type)3  | 1.5997 | 0.6251 | 9.0195  | 9.4203  | 0.7906 | 1.8942 | 0     |
| factor(CokeFreeOutcome_Type)4  | 2.2493 | 0.4446 | 18.7897 | 19.6247 | 0.6668 | 2.6634 | 1     |
| FU                             | 1.2327 | 0.8112 | 3.4993  | 3.6548  | 0.9007 | 1.4596 | 0     |
| Year                           | 1.5482 | 0.6459 | 8.2456  | 8.6121  | 0.8037 | 1.8333 | 0     |
| Proportion_Male                | 1.4187 | 0.7049 | 6.2977  | 6.5775  | 0.8396 | 1.6799 | 0     |
| Mean_Age                       | 1.5754 | 0.6348 | 8.6536  | 9.0381  | 0.7967 | 1.8654 | 0     |
| Mean_daysweek                  | 1.5850 | 0.6309 | 8.7987  | 9.1897  | 0.7943 | 1.8768 | 0     |
| Years_use                      | 1.9582 | 0.5107 | 14.4110 | 15.0514 | 0.7146 | 2.3187 | 0     |
| ASI_Drug                       | 1.4401 | 0.6944 | 6.6186  | 6.9127  | 0.8333 | 1.7052 | 0     |

1 --> COLLINEARITY is detected by the test

0 --> COLLINEARITY is not detected by the test

factor(Anticonvulsants)1 , factor(Antidepressants)1 , factor(Antipsychotics)1 ,  
 factor(DopamineAgonists)1 , factor(MiscMeds)1 , factor(Other)1 , factor(Placebo)1 ,  
 factor(Psychotherapy)1 , factor(Psychostimulants)1 , factor(Double\_Blind)1 , factor(Multisite)1 ,  
 factor(Randomized)1 , Year , Mean\_Age , Mean\_daysweek , ASI\_Drug , coefficient(s) are non-  
 significant may be due to multicollinearity

R-square of y on all x: 0.5165

\* use method argument to check which regressors may be the reason of collinearity

=====



[1] Model4

Multivariate Meta-Analysis Model (k = 402; method: REML)

Variance Components:

|           | estim  | sqrt   | nlvls | fixed | factor         |
|-----------|--------|--------|-------|-------|----------------|
| sigma^2.1 | 0.7882 | 0.8878 | 98    | no    | Author         |
| sigma^2.2 | 0.6228 | 0.7892 | 157   | no    | Author/StudyID |

Test for Residual Heterogeneity:

QE(df = 375) = 1029.4430, p-val < .0001

Test of Moderators (coefficient(s)

2, 3, 4, 5, 6, 7, 8, 9, 10, 11, 12, 13, 14, 15, 16, 17, 18, 19, 20, 21, 22, 23, 24, 25, 26, 27):

QM(df = 26) = 124.7149, p-val < .0001

Model Results:

|                                | estimate | se      | zval    | pval   | ci.lb     | ci.ub   |     |
|--------------------------------|----------|---------|---------|--------|-----------|---------|-----|
| intrcpt                        | -47.7313 | 43.8140 | -1.0894 | 0.2760 | -133.6051 | 38.1426 |     |
| factor(Anticonvulsants)1       | 0.2162   | 0.3529  | 0.6127  | 0.5401 | -0.4755   | 0.9080  |     |
| factor(Antidepressants)1       | 0.2804   | 0.3838  | 0.7306  | 0.4650 | -0.4718   | 1.0325  |     |
| factor(Antipsychotics)1        | 0.0800   | 0.4139  | 0.1932  | 0.8468 | -0.7312   | 0.8911  |     |
| factor(ContingencyManagement)1 | 0.7042   | 0.1315  | 5.3571  | <.0001 | 0.4466    | 0.9619  | *** |
| factor(DopamineAgonists)1      | 0.0209   | 0.3354  | 0.0623  | 0.9503 | -0.6365   | 0.6783  |     |
| factor(MiscMeds)1              | 0.0309   | 0.3029  | 0.1021  | 0.9187 | -0.5628   | 0.6246  |     |
| factor(Opioid)1                | 0.3601   | 0.2385  | 1.5094  | 0.1312 | -0.1075   | 0.8276  |     |
| factor(Other)1                 | 0.2921   | 0.3320  | 0.8796  | 0.3791 | -0.3587   | 0.9428  |     |
| factor(Placebo)1               | -0.0696  | 0.2687  | -0.2591 | 0.7955 | -0.5963   | 0.4570  |     |
| factor(Psychotherapy)1         | 0.1775   | 0.1974  | 0.8993  | 0.3685 | -0.2094   | 0.5645  |     |
| factor(Psychostimulants)1      | 0.5749   | 0.3245  | 1.7717  | 0.0764 | -0.0611   | 1.2108  | .   |
| factor(Double_Blind)1          | -0.4629  | 0.3257  | -1.4211 | 0.1553 | -1.1013   | 0.1755  |     |
| factor(Multisite)1             | 0.3194   | 0.3622  | 0.8821  | 0.3777 | -0.3904   | 1.0292  |     |
| factor(Randomized)1            | -0.1804  | 0.4164  | -0.4333 | 0.6648 | -0.9966   | 0.6358  |     |
| factor(BaselineType)2          | -1.6199  | 0.2492  | -6.4996 | <.0001 | -2.1084   | -1.1314 | *** |
| factor(BaselineType)3          | -1.0147  | 0.2577  | -3.9369 | <.0001 | -1.5199   | -0.5096 | *** |
| factor(CokeFreeOutcome_Type)2  | 0.1029   | 0.2889  | 0.3561  | 0.7218 | -0.4634   | 0.6691  |     |
| factor(CokeFreeOutcome_Type)3  | -0.2487  | 0.4632  | -0.5369 | 0.5914 | -1.1564   | 0.6591  |     |
| factor(CokeFreeOutcome_Type)4  | 0.7213   | 0.3210  | 2.2472  | 0.0246 | 0.0922    | 1.3504  | *   |
| FU                             | 0.0284   | 0.0121  | 2.3568  | 0.0184 | 0.0048    | 0.0520  | *   |
| Year                           | 0.0245   | 0.0220  | 1.1122  | 0.2661 | -0.0187   | 0.0676  |     |
| Proportion_Male                | 0.7542   | 0.4321  | 1.7455  | 0.0809 | -0.0926   | 1.6011  | .   |
| Mean_Age                       | -0.0239  | 0.0218  | -1.0960 | 0.2731 | -0.0666   | 0.0188  |     |
| Mean_daysweek                  | 0.1085   | 0.0649  | 1.6719  | 0.0945 | -0.0187   | 0.2358  | .   |
| Years_use                      | 0.0100   | 0.0206  | 0.4858  | 0.6271 | -0.0303   | 0.0503  |     |
| ASI_Drug                       | 0.3502   | 0.8464  | 0.4137  | 0.6791 | -1.3088   | 2.0091  |     |

---

Signif. codes: 0 '\*\*\*' 0.001 '\*\*' 0.01 '\*' 0.05 '.' 0.1 ' ' 1

[1] ICC = 0.559

[1] Model4I2 = 72.938820015205

[1] Collinearity diagnostics for Model 4

Call:

imcdiag(x = x, y = y, method = method, corr = FALSE, vif = vif, tol = tol, conf = conf, cvif = cvif, leamer = leamer, all = all)

All Individual Multicollinearity Diagnostics Result

|                                | VIF    | TOL    | Wi     | Fi     | Leamer | CVIF   | Klein |
|--------------------------------|--------|--------|--------|--------|--------|--------|-------|
| factor(Anticonvulsants)1       | 1.5346 | 0.6516 | 8.0399 | 8.3972 | 0.8072 | 1.8364 | 0     |
| factor(Antidepressants)1       | 1.4619 | 0.6840 | 6.9477 | 7.2564 | 0.8271 | 1.7495 | 0     |
| factor(Antipsychotics)1        | 1.3989 | 0.7149 | 5.9989 | 6.2655 | 0.8455 | 1.6740 | 0     |
| factor(ContingencyManagement)1 | 1.3502 | 0.7406 | 5.2672 | 5.5012 | 0.8606 | 1.6158 | 0     |
| factor(DopamineAgonists)1      | 1.5876 | 0.6299 | 8.8376 | 9.2304 | 0.7936 | 1.8999 | 0     |

|                               |        |        |         |         |        |        |   |
|-------------------------------|--------|--------|---------|---------|--------|--------|---|
| factor(MiscMeds)1             | 2.2347 | 0.4475 | 18.5698 | 19.3950 | 0.6689 | 2.6743 | 1 |
| factor(Opioid)1               | 1.5657 | 0.6387 | 8.5089  | 8.8870  | 0.7992 | 1.8738 | 0 |
| factor(Other)1                | 1.4914 | 0.6705 | 7.3904  | 7.7188  | 0.8189 | 1.7848 | 0 |
| factor(Placebo)1              | 3.1049 | 0.3221 | 31.6580 | 33.0647 | 0.5675 | 3.7157 | 1 |
| factor(Psychotherapy)1        | 1.3835 | 0.7228 | 5.7679  | 6.0242  | 0.8502 | 1.6557 | 0 |
| factor(Psychostimulants)1     | 1.4867 | 0.6726 | 7.3203  | 7.6456  | 0.8201 | 1.7792 | 0 |
| factor(Double_Blind)1         | 2.9565 | 0.3382 | 29.4264 | 30.7341 | 0.5816 | 3.5381 | 1 |
| factor(Multisite)1            | 1.4532 | 0.6881 | 6.8159  | 7.1187  | 0.8295 | 1.7390 | 0 |
| factor(Randomized)1           | 1.4402 | 0.6943 | 6.6210  | 6.9152  | 0.8333 | 1.7235 | 0 |
| factor(BaselineType)2         | 1.8836 | 0.5309 | 13.2895 | 13.8801 | 0.7286 | 2.2541 | 1 |
| factor(BaselineType)3         | 1.7258 | 0.5794 | 10.9159 | 11.4009 | 0.7612 | 2.0653 | 1 |
| factor(CokeFreeOutcome_Type)2 | 2.5299 | 0.3953 | 23.0093 | 24.0317 | 0.6287 | 3.0275 | 1 |
| factor(CokeFreeOutcome_Type)3 | 1.3343 | 0.7495 | 5.0273  | 5.2507  | 0.8657 | 1.5967 | 0 |
| factor(CokeFreeOutcome_Type)4 | 2.1595 | 0.4631 | 17.4389 | 18.2138 | 0.6805 | 2.5843 | 1 |
| FU                            | 1.2653 | 0.7903 | 3.9909  | 4.1682  | 0.8890 | 1.5143 | 0 |
| Year                          | 1.6411 | 0.6094 | 9.6418  | 10.0702 | 0.7806 | 1.9639 | 0 |
| Proportion_Male               | 1.4072 | 0.7106 | 6.1249  | 6.3971  | 0.8430 | 1.6841 | 0 |
| Mean_Age                      | 1.3932 | 0.7178 | 5.9133  | 6.1760  | 0.8472 | 1.6672 | 0 |
| Mean_daysweek                 | 1.2982 | 0.7703 | 4.4850  | 4.6843  | 0.8777 | 1.5536 | 0 |
| Years_use                     | 1.2326 | 0.8113 | 3.4990  | 3.6545  | 0.9007 | 1.4751 | 0 |
| ASI_Drug                      | 1.9410 | 0.5152 | 14.1530 | 14.7820 | 0.7178 | 2.3229 | 1 |

1 --> COLLINEARITY is detected by the test  
0 --> COLLINEARITY is not detected by the test

factor(Anticonvulsants)1 , factor(Antidepressants)1 , factor(Antipsychotics)1 ,  
factor(ContingencyManagement)1 , factor(DopamineAgonists)1 , factor(MiscMeds)1 , factor(Other)1 ,  
factor(Placebo)1 , factor(Psychotherapy)1 , factor(Psychostimulants)1 , factor(Multisite)1 ,  
factor(Randomized)1 , factor(CokeFreeOutcome\_Type)2 , factor(CokeFreeOutcome\_Type)3 ,  
factor(CokeFreeOutcome\_Type)4 , Mean\_Age , Years\_use , ASI\_Drug , coefficient(s) are non-  
significant may be due to multicollinearity

R-square of y on all x: 0.4127

\* use method argument to check which regressors may be the reason of collinearity  
=====

[1] Model5

Multivariate Meta-Analysis Model (k = 402; method: REML)

Variance Components:

|           | estim  | sqrt   | nlvls | fixed | factor         |
|-----------|--------|--------|-------|-------|----------------|
| sigma^2.1 | 0.2789 | 0.5281 | 98    | no    | Author         |
| sigma^2.2 | 0.9800 | 0.9899 | 157   | no    | Author/StudyID |

Test for Residual Heterogeneity:  
QE(df = 375) = 1023.1494, p-val < .0001

Test of Moderators (coefficient(s)  
2,3,4,5,6,7,8,9,10,11,12,13,14,15,16,17,18,19,20,21,22,23,24,25,26,27) :  
QM(df = 26) = 149.9986, p-val < .0001

Model Results:

|                                | estimate | se      | zval    | pval   | ci.lb     | ci.ub      |
|--------------------------------|----------|---------|---------|--------|-----------|------------|
| intrcpt                        | -39.6270 | 42.3165 | -0.9364 | 0.3490 | -122.5657 | 43.3118    |
| factor(Anticonvulsants)1       | 0.3909   | 0.3480  | 1.1231  | 0.2614 | -0.2913   | 1.0730     |
| factor(Antidepressants)1       | 0.4241   | 0.3853  | 1.1009  | 0.2710 | -0.3310   | 1.1792     |
| factor(Antipsychotics)1        | -0.2520  | 0.4037  | -0.6242 | 0.5325 | -1.0433   | 0.5393     |
| factor(ContingencyManagement)1 | 0.7851   | 0.1250  | 6.2800  | <.0001 | 0.5401    | 1.0301 *** |
| factor(DopamineAgonists)1      | -0.0828  | 0.3344  | -0.2476 | 0.8045 | -0.7382   | 0.5727     |
| factor(MiscMeds)1              | 0.0809   | 0.2970  | 0.2724  | 0.7853 | -0.5012   | 0.6630     |
| factor(Opioid)1                | 0.6644   | 0.2303  | 2.8849  | 0.0039 | 0.2130    | 1.1158 **  |
| factor(Other)1                 | 0.2392   | 0.3060  | 0.7817  | 0.4344 | -0.3606   | 0.8390     |
| factor(Placebo)1               | -0.0392  | 0.2660  | -0.1474 | 0.8828 | -0.5605   | 0.4821     |
| factor(Psychotherapy)1         | 0.1495   | 0.1838  | 0.8134  | 0.4160 | -0.2107   | 0.5096     |
| factor(Psychostimulants)1      | 0.4791   | 0.3224  | 1.4859  | 0.1373 | -0.1529   | 1.1110     |

|                               |         |        |         |        |         |         |     |
|-------------------------------|---------|--------|---------|--------|---------|---------|-----|
| factor(Double_Blind)1         | 0.0709  | 0.3085 | 0.2299  | 0.8182 | -0.5337 | 0.6755  |     |
| factor(Multisite)1            | -0.0422 | 0.3538 | -0.1192 | 0.9052 | -0.7356 | 0.6513  |     |
| factor(Randomized)1           | -0.4997 | 0.4054 | -1.2327 | 0.2177 | -1.2943 | 0.2948  |     |
| factor(BaselineType)2         | -1.2367 | 0.2258 | -5.4774 | <.0001 | -1.6792 | -0.7942 | *** |
| factor(BaselineType)3         | -0.2764 | 0.2334 | -1.1842 | 0.2363 | -0.7340 | 0.1811  |     |
| factor(CokeFreeOutcome_Type)2 | -0.5184 | 0.3013 | -1.7204 | 0.0854 | -1.1090 | 0.0722  | .   |
| factor(CokeFreeOutcome_Type)3 | -1.3126 | 0.4623 | -2.8396 | 0.0045 | -2.2187 | -0.4066 | **  |
| factor(CokeFreeOutcome_Type)4 | 0.7580  | 0.3240 | 2.3393  | 0.0193 | 0.1229  | 1.3931  | *   |
| FU                            | 0.0202  | 0.0118 | 1.7148  | 0.0864 | -0.0029 | 0.0432  | .   |
| Year                          | 0.0197  | 0.0213 | 0.9278  | 0.3535 | -0.0219 | 0.0614  | .   |
| Proportion_Male               | 0.7853  | 0.4270 | 1.8390  | 0.0659 | -0.0516 | 1.6222  | .   |
| Mean_Age                      | 0.0085  | 0.0213 | 0.4015  | 0.6880 | -0.0332 | 0.0503  | .   |
| Mean_daysweek                 | 0.0553  | 0.0683 | 0.8092  | 0.4184 | -0.0786 | 0.1892  | .   |
| Years_use                     | 0.0104  | 0.0199 | 0.5226  | 0.6013 | -0.0286 | 0.0494  | .   |
| ASI_Drug                      | 0.2461  | 0.5257 | 0.4681  | 0.6397 | -0.7843 | 1.2765  | .   |

---

Signif. codes: 0 '\*\*\*' 0.001 '\*\*' 0.01 '\*' 0.05 '.' 0.1 ' ' 1

[1] ICC = 0.222

[1] ModelSI2 = 72.688652758625

[1] Collinearity diagnostics for Model 5

Call:

```
imcdiag(x = x, y = y, method = method, corr = FALSE, vif = vif,
        tol = tol, conf = conf, cvif = cvif, leamer = leamer, all = all)
```

#### All Individual Multicollinearity Diagnostics Result

|                                | VIF    | TOL    | Wi      | Fi      | Leamer | CVIF   | Klein |
|--------------------------------|--------|--------|---------|---------|--------|--------|-------|
| factor(Anticonvulsants)1       | 1.5184 | 0.6586 | 7.7961  | 8.1425  | 0.8115 | 2.2490 | 0     |
| factor(Antidepressants)1       | 1.4336 | 0.6976 | 6.5211  | 6.8109  | 0.8352 | 2.1234 | 0     |
| factor(Antipsychotics)1        | 1.4263 | 0.7011 | 6.4119  | 6.6968  | 0.8373 | 2.1126 | 0     |
| factor(ContingencyManagement)1 | 1.3736 | 0.7280 | 5.6196  | 5.8693  | 0.8532 | 2.0346 | 0     |
| factor(DopamineAgonists)1      | 1.5800 | 0.6329 | 8.7228  | 9.1104  | 0.7956 | 2.3402 | 0     |
| factor(MiscMeds)1              | 2.2206 | 0.4503 | 18.3579 | 19.1736 | 0.6711 | 3.2891 | 1     |
| factor(Opioid)1                | 1.5609 | 0.6407 | 8.4359  | 8.8107  | 0.8004 | 2.3120 | 0     |
| factor(Other)1                 | 1.4845 | 0.6736 | 7.2873  | 7.6111  | 0.8207 | 2.1989 | 0     |
| factor(Placebo)1               | 3.0791 | 0.3248 | 31.2698 | 32.6593 | 0.5699 | 4.5607 | 1     |
| factor(Psychotherapy)1         | 1.4048 | 0.7119 | 6.0878  | 6.3583  | 0.8437 | 2.0807 | 0     |
| factor(Psychostimulants)1      | 1.4848 | 0.6735 | 7.2920  | 7.6160  | 0.8207 | 2.1993 | 0     |
| factor(Double_Blind)1          | 2.8373 | 0.3524 | 27.6327 | 28.8606 | 0.5937 | 4.2025 | 1     |
| factor(Multisite)1             | 1.3446 | 0.7437 | 5.1823  | 5.4126  | 0.8624 | 1.9916 | 0     |
| factor(Randomized)1            | 1.4173 | 0.7055 | 6.2769  | 6.5559  | 0.8400 | 2.0994 | 0     |
| factor(BaselineType)2          | 1.9907 | 0.5023 | 14.8994 | 15.5615 | 0.7088 | 2.9485 | 1     |
| factor(BaselineType)3          | 1.9884 | 0.5029 | 14.8660 | 15.5266 | 0.7092 | 2.9452 | 1     |
| factor(CokeFreeOutcome_Type)2  | 2.9980 | 0.3336 | 30.0493 | 31.3846 | 0.5775 | 4.4405 | 1     |
| factor(CokeFreeOutcome_Type)3  | 1.3292 | 0.7523 | 4.9513  | 5.1713  | 0.8674 | 1.9688 | 0     |
| factor(CokeFreeOutcome_Type)4  | 2.0528 | 0.4872 | 15.8334 | 16.5370 | 0.6980 | 3.0405 | 1     |
| FU                             | 1.2250 | 0.8163 | 3.3847  | 3.5351  | 0.9035 | 1.8145 | 0     |
| Year                           | 1.6017 | 0.6243 | 9.0493  | 9.4515  | 0.7902 | 2.3724 | 0     |
| Proportion_Male                | 1.4141 | 0.7072 | 6.2274  | 6.5041  | 0.8409 | 2.0945 | 0     |
| Mean_Age                       | 1.4013 | 0.7136 | 6.0355  | 6.3037  | 0.8448 | 2.0756 | 0     |
| Mean_daysweek                  | 1.3987 | 0.7150 | 5.9964  | 6.2629  | 0.8455 | 2.0717 | 0     |
| Years_use                      | 1.7174 | 0.5823 | 10.7892 | 11.2687 | 0.7631 | 2.5437 | 0     |
| ASI_Drug                       | 2.2857 | 0.4375 | 19.3375 | 20.1968 | 0.6614 | 3.3856 | 1     |

1 --> COLLINEARITY is detected by the test

0 --> COLLINEARITY is not detected by the test

factor(Anticonvulsants)1 , factor(Antidepressants)1 , factor(DopamineAgonists)1 , factor(MiscMeds)1 , factor(Other)1 , factor(Placebo)1 , factor(Psychotherapy)1 , factor(Psychostimulants)1 , factor(Double\_Blind)1 , factor(Multisite)1 , factor(CokeFreeOutcome\_Type)2 , Year , Mean\_Age , Mean\_daysweek , Years\_use , ASI\_Drug , coefficient(s) are non-significant may be due to multicollinearity

R-square of y on all x: 0.4451

\* use method argument to check which regressors may be the reason of collinearity

=====

[1] Pooled Results

|                                |             |      | est           | se          | t           | df         | Pr(> t )     |   |
|--------------------------------|-------------|------|---------------|-------------|-------------|------------|--------------|---|
| lo 95                          | hi 95       | nmis |               |             |             |            |              |   |
| intrcpt                        |             |      | -43.907529397 | 46.62440419 | -0.94172848 | 93.765559  | 3.487516e-01 | - |
| 1.364844e+02                   | 48.66933572 | NA   |               |             |             |            |              |   |
| factor(Anticonvulsants)1       |             |      | 0.332647014   | 0.42119681  | 0.78976623  | 30.372545  | 4.357870e-01 | - |
| 5.271094e-01                   | 1.19240342  | NA   |               |             |             |            |              |   |
| factor(Antidepressants)1       |             |      | 0.306467265   | 0.38726472  | 0.79136376  | 277.406870 | 4.294079e-01 | - |
| 4.558836e-01                   | 1.06881815  | NA   |               |             |             |            |              |   |
| factor(Antipsychotics)1        |             |      | 0.023853718   | 0.45466371  | 0.05246453  | 83.513078  | 9.582838e-01 | - |
| 8.803720e-01                   | 0.92807939  | NA   |               |             |             |            |              |   |
| factor(ContingencyManagement)1 |             |      | 0.757399884   | 0.13719332  | 5.52067619  | 84.120914  | 3.673800e-07 |   |
| 4.845817e-01                   | 1.03021811  | NA   |               |             |             |            |              |   |
| factor(DopamineAgonists)1      |             |      | 0.043565170   | 0.36104169  | 0.12066520  | 114.433769 | 9.041678e-01 | - |
| 6.716266e-01                   | 0.75875690  | NA   |               |             |             |            |              |   |
| factor(MiscMeds)1              |             |      | 0.131248988   | 0.32511825  | 0.40369615  | 93.885178  | 6.873542e-01 | - |
| 5.142912e-01                   | 0.77678920  | NA   |               |             |             |            |              |   |
| factor(Opioid)1                |             |      | 0.528921867   | 0.27365336  | 1.93281698  | 56.122529  | 5.831050e-02 | - |
| 1.924528e-02                   | 1.07708902  | NA   |               |             |             |            |              |   |
| factor(Other)1                 |             |      | 0.296889670   | 0.32118685  | 0.92435188  | 335.535127 | 3.559674e-01 | - |
| 3.349039e-01                   | 0.92868323  | NA   |               |             |             |            |              |   |
| factor(Placebo)1               |             |      | 0.029299990   | 0.28359370  | 0.10331679  | 143.980508 | 9.178553e-01 | - |
| 5.312449e-01                   | 0.58984487  | NA   |               |             |             |            |              |   |
| factor(Psychotherapy)1         |             |      | 0.167235651   | 0.19207922  | 0.87065976  | 286.691709 | 3.846684e-01 | - |
| 2.108287e-01                   | 0.54530002  | NA   |               |             |             |            |              |   |
| factor(Psychostimulants)1      |             |      | 0.555174471   | 0.37890957  | 1.46518989  | 42.255480  | 1.502708e-01 | - |
| 2.093591e-01                   | 1.31970799  | NA   |               |             |             |            |              |   |
| factor(Double_Blind)1          |             |      | -0.309188061  | 0.47224852  | -0.65471473 | 12.771146  | 5.242683e-01 | - |
| 1.331281e+00                   | 0.71290439  | NA   |               |             |             |            |              |   |
| factor(Multisite)1             |             |      | 0.256476576   | 0.39503559  | 0.64924929  | 65.212156  | 5.184575e-01 | - |
| 5.324153e-01                   | 1.04536847  | NA   |               |             |             |            |              |   |
| factor(Randomized)1            |             |      | 0.071709436   | 0.59575588  | 0.12036715  | 12.654782  | 9.060823e-01 | - |
| 1.218921e+00                   | 1.36233995  | NA   |               |             |             |            |              |   |
| factor(BaselineType)2          |             |      | -1.334140571  | 0.34474420  | -3.86994348 | 13.022345  | 1.927259e-03 | - |
| 2.078785e+00                   | -0.58949589 | NA   |               |             |             |            |              |   |
| factor(BaselineType)3          |             |      | -0.876220704  | 0.91178991  | -0.96098969 | 3.846426   | 3.929943e-01 | - |
| 3.448120e+00                   | 1.69567847  | NA   |               |             |             |            |              |   |
| factor(CokeFreeOutcome_Type)2  |             |      | -0.265012317  | 0.48781970  | -0.54325875 | 8.339523   | 6.011674e-01 | - |
| 1.382004e+00                   | 0.85197980  | NA   |               |             |             |            |              |   |
| factor(CokeFreeOutcome_Type)3  |             |      | -0.979574713  | 0.95892697  | -1.02153213 | 6.406533   | 3.440181e-01 | - |
| 3.290360e+00                   | 1.33121103  | NA   |               |             |             |            |              |   |
| factor(CokeFreeOutcome_Type)4  |             |      | -0.211317791  | 1.33442960  | -0.15835814 | 3.715219   | 8.824049e-01 | - |
| 4.031024e+00                   | 3.60838801  | NA   |               |             |             |            |              |   |
| FU                             |             |      | 0.021258733   | 0.01433818  | 1.48266594  | 27.831663  | 1.493991e-01 | - |
| 8.119705e-03                   | 0.05063717  | 0    |               |             |             |            |              |   |
| Year                           |             |      | 0.021932369   | 0.02353582  | 0.93187184  | 88.077402  | 3.539501e-01 | - |
| 2.483956e-02                   | 0.06870430  | 0    |               |             |             |            |              |   |
| Proportion_Male                |             |      | 0.858014017   | 0.47046869  | 1.82374307  | 85.613488  | 7.168031e-02 | - |
| 7.730703e-02                   | 1.79333506  | 11   |               |             |             |            |              |   |
| Mean_Age                       |             |      | 0.002526762   | 0.03004749  | 0.08409231  | 16.258369  | 9.340098e-01 | - |
| 6.108889e-02                   | 0.06614242  | 10   |               |             |             |            |              |   |
| Mean_daysweek                  |             |      | 0.071504944   | 0.08308718  | 0.86060136  | 22.647279  | 3.984773e-01 | - |
| 1.005222e-01                   | 0.24353213  | 128  |               |             |             |            |              |   |
| Years_use                      |             |      | 0.008061793   | 0.02161866  | 0.37290907  | 151.840409 | 7.097362e-01 | - |
| 3.465041e-02                   | 0.05077400  | 166  |               |             |             |            |              |   |
| ASI_Drug                       |             |      | -0.135866567  | 0.77879113  | -0.17445829 | 22.854495  | 8.630415e-01 | - |
| 1.747487e+00                   | 1.47575337  | 273  |               |             |             |            |              |   |
|                                |             |      | fmi           | lambda      |             |            |              |   |
| intrcpt                        |             |      | 0.18945253    | 0.17234616  |             |            |              |   |
| factor(Anticonvulsants)1       |             |      | 0.37935369    | 0.33978748  |             |            |              |   |
| factor(Antidepressants)1       |             |      | 0.06211933    | 0.05538185  |             |            |              |   |
| factor(Antipsychotics)1        |             |      | 0.20513723    | 0.18632682  |             |            |              |   |
| factor(ContingencyManagement)1 |             |      | 0.20413435    | 0.18543470  |             |            |              |   |
| factor(DopamineAgonists)1      |             |      | 0.16397259    | 0.14948762  |             |            |              |   |
| factor(MiscMeds)1              |             |      | 0.18928363    | 0.17219526  |             |            |              |   |

```

factor(Opioid)1      0.26486070 0.23912167
factor(Other)1      0.03525675 0.02952337
factor(Placebo)1    0.13653674 0.12462530
factor(Psychotherapy)1 0.05799971 0.05145103
factor(Psychostimulants)1 0.31406283 0.28234722
factor(Double_Blind)1 0.59701515 0.53848918
factor(Multisite)1  0.24114551 0.21822360
factor(Randomized)1 0.59967295 0.54103752
factor(BaselineType)2 0.59138227 0.53310133
factor(BaselineType)3 0.95410440 0.93516443
factor(CokeFreeOutcome_Type)2 0.72719960 0.66878111
factor(CokeFreeOutcome_Type)3 0.81198787 0.76121860
factor(CokeFreeOutcome_Type)4 0.95987787 0.94285974
FU                  0.39819821 0.35645231
Year                0.19784341 0.17983309
Proportion_Male    0.20171385 0.18328055
Mean_Age           0.52950055 0.47497634
Mean_daysweek      0.44539624 0.39848989
Years_use          0.13042098 0.11904206
ASI_Drug           0.44322847 0.39654783

```

Output 2: (With completion rate as covariate)

[1] Modell

Multivariate Meta-Analysis Model (k = 402; method: REML)

Variance Components:

|           | estim  | sqrt   | nlvls | fixed | factor         |
|-----------|--------|--------|-------|-------|----------------|
| sigma^2.1 | 0.2787 | 0.5279 | 98    | no    | Author         |
| sigma^2.2 | 1.0922 | 1.0451 | 157   | no    | Author/StudyID |

Test for Residual Heterogeneity:

QE(df = 374) = 949.7756, p-val < .0001

Test of Moderators (coefficient(s)

2,3,4,5,6,7,8,9,10,11,12,13,14,15,16,17,18,19,20,21,22,23,24,25,26,27,28) :

QM(df = 27) = 174.8822, p-val < .0001

Model Results:

|                                | estimate | se      | zval    | pval   | ci.lb     | ci.ub       |
|--------------------------------|----------|---------|---------|--------|-----------|-------------|
| intrcpt                        | -64.4895 | 42.8486 | -1.5051 | 0.1323 | -148.4711 | 19.4922     |
| factor(Anticonvulsants)1       | 0.4189   | 0.3502  | 1.1960  | 0.2317 | -0.2676   | 1.1053      |
| factor(Antidepressants)1       | 0.1757   | 0.3884  | 0.4525  | 0.6509 | -0.5854   | 0.9369      |
| factor(Antipsychotics)1        | -0.3218  | 0.4379  | -0.7350 | 0.4624 | -1.1801   | 0.5364      |
| factor(ContingencyManagement)1 | 0.6804   | 0.1303  | 5.2205  | <.0001 | 0.4249    | 0.9358 ***  |
| factor(DopamineAgonists)1      | 0.1018   | 0.3423  | 0.2973  | 0.7662 | -0.5692   | 0.7727      |
| factor(MiscMeds)1              | 0.0375   | 0.3076  | 0.1220  | 0.9029 | -0.5653   | 0.6403      |
| factor(Opioid)1                | 0.1267   | 0.2552  | 0.4965  | 0.6195 | -0.3735   | 0.6270      |
| factor(Other)1                 | -0.0205  | 0.3382  | -0.0605 | 0.9518 | -0.6834   | 0.6425      |
| factor(Placebo)1               | -0.1149  | 0.2744  | -0.4189 | 0.6753 | -0.6527   | 0.4228      |
| factor(Psychotherapy)1         | -0.0773  | 0.2017  | -0.3830 | 0.7017 | -0.4726   | 0.3181      |
| factor(Psychostimulants)1      | 0.5585   | 0.3323  | 1.6805  | 0.0929 | -0.0929   | 1.2098 .    |
| factor(Double_Blind)1          | -0.4477  | 0.3416  | -1.3107 | 0.1900 | -1.1172   | 0.2218      |
| factor(Multisite)1             | 0.3364   | 0.3644  | 0.9231  | 0.3559 | -0.3778   | 1.0505      |
| factor(Randomized)1            | 0.0818   | 0.4154  | 0.1970  | 0.8438 | -0.7324   | 0.8960      |
| factor(BaselineType)2          | -1.2333  | 0.2561  | -4.8152 | <.0001 | -1.7353   | -0.7313 *** |
| factor(BaselineType)3          | -0.0828  | 0.2509  | -0.3298 | 0.7415 | -0.5746   | 0.4091      |
| factor(CokeFreeOutcome_Type)2  | 0.5681   | 0.3025  | 1.8779  | 0.0604 | -0.0248   | 1.1610 .    |
| factor(CokeFreeOutcome_Type)3  | 0.4853   | 0.5035  | 0.9638  | 0.3351 | -0.5016   | 1.4722      |
| factor(CokeFreeOutcome_Type)4  | 0.6928   | 0.3318  | 2.0883  | 0.0368 | 0.0426    | 1.3431 *    |
| FU                             | 0.0351   | 0.0124  | 2.8380  | 0.0045 | 0.0108    | 0.0593 **   |
| Year                           | 0.0318   | 0.0215  | 1.4766  | 0.1398 | -0.0104   | 0.0739      |
| Proportion_Male                | 1.0264   | 0.4433  | 2.3154  | 0.0206 | 0.1576    | 1.8952 *    |
| Mean_Age                       | -0.0173  | 0.0221  | -0.7831 | 0.4336 | -0.0605   | 0.0260      |
| Mean_daysweek                  | 0.0240   | 0.0630  | 0.3803  | 0.7037 | -0.0996   | 0.1476      |

|           |         |        |         |        |         |            |
|-----------|---------|--------|---------|--------|---------|------------|
| Years_use | -0.0187 | 0.0209 | -0.8961 | 0.3702 | -0.0597 | 0.0222     |
| ASI_Drug  | -0.4087 | 0.5778 | -0.7072 | 0.4794 | -1.5412 | 0.7239     |
| Complete  | 2.7472  | 0.3763 | 7.3001  | <.0001 | 2.0096  | 3.4847 *** |

---

Signif. codes: 0 '\*\*\*' 0.001 '\*\*' 0.01 '\*' 0.05 '.' 0.1 ' ' 1

[1] ICC = 0.203  
 [1] ModellI2 = 72.6574118961228

[1] Collinearity diagnostics for Model 1

Call:  
 imcdiag(x = x, y = y, method = method, corr = FALSE, vif = vif,  
 tol = tol, conf = conf, cvif = cvif, leamer = leamer, all = all)

All Individual Multicollinearity Diagnostics Result

|                                | VIF    | TOL    | Wi      | Fi      | Leamer | CVIF   | Klein |
|--------------------------------|--------|--------|---------|---------|--------|--------|-------|
| factor(Anticonvulsants)1       | 1.4833 | 0.6742 | 6.9714  | 7.2696  | 0.8211 | 2.3390 | 0     |
| factor(Antidepressants)1       | 1.4544 | 0.6876 | 6.5544  | 6.8347  | 0.8292 | 2.2934 | 0     |
| factor(Antipsychotics)1        | 1.3825 | 0.7233 | 5.5167  | 5.7526  | 0.8505 | 2.1799 | 0     |
| factor(ContingencyManagement)1 | 1.3702 | 0.7298 | 5.3397  | 5.5681  | 0.8543 | 2.1606 | 0     |
| factor(DopamineAgonists)1      | 1.5746 | 0.6351 | 8.2876  | 8.6421  | 0.7969 | 2.4829 | 0     |
| factor(MiscMeds)1              | 2.2211 | 0.4502 | 17.6117 | 18.3650 | 0.6710 | 3.5022 | 1     |
| factor(Opioid)1                | 2.1712 | 0.4606 | 16.8919 | 17.6144 | 0.6787 | 3.4235 | 1     |
| factor(Other)1                 | 1.5040 | 0.6649 | 7.2694  | 7.5804  | 0.8154 | 2.3715 | 0     |
| factor(Placebo)1               | 3.0421 | 0.3287 | 29.4533 | 30.7132 | 0.5733 | 4.7968 | 1     |
| factor(Psychotherapy)1         | 1.3786 | 0.7254 | 5.4602  | 5.6937  | 0.8517 | 2.1737 | 0     |
| factor(Psychostimulants)1      | 1.4977 | 0.6677 | 7.1786  | 7.4857  | 0.8171 | 2.3616 | 0     |
| factor(Double_Blind)1          | 3.2920 | 0.3038 | 33.0573 | 34.4713 | 0.5512 | 5.1908 | 1     |
| factor(Multisite)1             | 1.2862 | 0.7775 | 4.1284  | 4.3050  | 0.8817 | 2.0281 | 0     |
| factor(Randomized)1            | 1.3882 | 0.7204 | 5.5989  | 5.8384  | 0.8487 | 2.1889 | 0     |
| factor(BaselineType)2          | 1.9551 | 0.5115 | 13.7762 | 14.3654 | 0.7152 | 3.0829 | 1     |
| factor(BaselineType)3          | 1.8839 | 0.5308 | 12.7479 | 13.2932 | 0.7286 | 2.9705 | 0     |
| factor(CokeFreeOutcome_Type)2  | 2.2468 | 0.4451 | 17.9825 | 18.7517 | 0.6671 | 3.5428 | 1     |
| factor(CokeFreeOutcome_Type)3  | 1.3664 | 0.7318 | 5.2851  | 5.5112  | 0.8555 | 2.1546 | 0     |
| factor(CokeFreeOutcome_Type)4  | 1.9602 | 0.5101 | 13.8493 | 14.4416 | 0.7142 | 3.0909 | 1     |
| FU                             | 1.2306 | 0.8126 | 3.3262  | 3.4685  | 0.9014 | 1.9404 | 0     |
| Year                           | 1.5316 | 0.6529 | 7.6672  | 7.9952  | 0.8080 | 2.4150 | 0     |
| Proportion_Male                | 1.4848 | 0.6735 | 6.9921  | 7.2912  | 0.8207 | 2.3412 | 0     |
| Mean_Age                       | 1.4792 | 0.6760 | 6.9120  | 7.2077  | 0.8222 | 2.3325 | 0     |
| Mean_daysweek                  | 1.3896 | 0.7196 | 5.6190  | 5.8594  | 0.8483 | 2.1911 | 0     |
| Years_use                      | 1.4658 | 0.6822 | 6.7183  | 7.0057  | 0.8260 | 2.3113 | 0     |
| ASI_Drug                       | 1.6405 | 0.6096 | 9.2386  | 9.6338  | 0.7807 | 2.5868 | 0     |
| Complete                       | 1.5170 | 0.6592 | 7.4567  | 7.7757  | 0.8119 | 2.3920 | 0     |

1 --> COLLINEARITY is detected by the test  
 0 --> COLLINEARITY is not detected by the test

factor(Anticonvulsants)1 , factor(Antidepressants)1 , factor(Antipsychotics)1 ,  
 factor(DopamineAgonists)1 , factor(MiscMeds)1 , factor(Opioid)1 , factor(Other)1 , factor(Placebo)1  
 , factor(Psychotherapy)1 , factor(Psychostimulants)1 , factor(Multisite)1 , factor(Randomized)1 ,  
 factor(CokeFreeOutcome\_Type)3 , Proportion\_Male , Mean\_Age , Mean\_daysweek , Years\_use , ASI\_Drug ,  
 coefficient(s) are non-significant may be due to multicollinearity

R-square of y on all x: 0.4799

\* use method argument to check which regressors may be the reason of collinearity  
 =====

[1] Model2

Multivariate Meta-Analysis Model (k = 402; method: REML)

Variance Components:

estim sqrt nlvls fixed factor

sigma^2.1 0.5918 0.7693 98 no Author  
 sigma^2.2 0.4885 0.6989 157 no Author/StudyID

Test for Residual Heterogeneity:  
 QE(df = 374) = 878.8091, p-val < .0001

Test of Moderators (coefficient(s)  
 2,3,4,5,6,7,8,9,10,11,12,13,14,15,16,17,18,19,20,21,22,23,24,25,26,27,28) :  
 QM(df = 27) = 304.9178, p-val < .0001

Model Results:

|                                | estimate | se      | zval    | pval   | ci.lb     | ci.ub   |     |
|--------------------------------|----------|---------|---------|--------|-----------|---------|-----|
| intrcpt                        | -53.6869 | 37.8771 | -1.4174 | 0.1564 | -127.9245 | 20.5508 |     |
| factor(Anticonvulsants)1       | -0.1631  | 0.3192  | -0.5111 | 0.6093 | -0.7887   | 0.4624  |     |
| factor(Antidepressants)1       | 0.2361   | 0.3584  | 0.6587  | 0.5101 | -0.4664   | 0.9386  |     |
| factor(Antipsychotics)1        | -0.0255  | 0.3874  | -0.0658 | 0.9475 | -0.7848   | 0.7338  |     |
| factor(ContingencyManagement)1 | 0.5391   | 0.1175  | 4.5898  | <.0001 | 0.3089    | 0.7693  | *** |
| factor(DopamineAgonists)1      | -0.1367  | 0.3174  | -0.4307 | 0.6667 | -0.7587   | 0.4853  |     |
| factor(MiscMeds)1              | -0.2277  | 0.2793  | -0.8152 | 0.4150 | -0.7752   | 0.3198  |     |
| factor(Opioid)1                | 0.0421   | 0.2335  | 0.1804  | 0.8568 | -0.4154   | 0.4997  |     |
| factor(Other)1                 | 0.1667   | 0.2948  | 0.5654  | 0.5718 | -0.4111   | 0.7444  |     |
| factor(Placebo)1               | -0.2042  | 0.2523  | -0.8095 | 0.4183 | -0.6986   | 0.2902  |     |
| factor(Psychotherapy)1         | 0.0377   | 0.1731  | 0.2176  | 0.8278 | -0.3015   | 0.3768  |     |
| factor(Psychostimulants)1      | 0.2153   | 0.3062  | 0.7029  | 0.4821 | -0.3850   | 0.8155  |     |
| factor(Double_Blind)1          | 0.2227   | 0.2914  | 0.7643  | 0.4447 | -0.3484   | 0.7938  |     |
| factor(Multisite)1             | 0.1259   | 0.3123  | 0.4030  | 0.6869 | -0.4863   | 0.7381  |     |
| factor(Randomized)1            | 0.4320   | 0.3601  | 1.1996  | 0.2303 | -0.2738   | 1.1378  |     |
| factor(BaselineType)2          | -1.5897  | 0.2073  | -7.6702 | <.0001 | -1.9959   | -1.1835 | *** |
| factor(BaselineType)3          | -1.9878  | 0.2006  | -9.9111 | <.0001 | -2.3808   | -1.5947 | *** |
| factor(CokeFreeOutcome_Type)2  | -0.2246  | 0.2434  | -0.9227 | 0.3562 | -0.7016   | 0.2525  |     |
| factor(CokeFreeOutcome_Type)3  | -0.8915  | 0.4305  | -2.0707 | 0.0384 | -1.7353   | -0.0477 | *   |
| factor(CokeFreeOutcome_Type)4  | -1.0962  | 0.3017  | -3.6330 | 0.0003 | -1.6875   | -0.5048 | *** |
| FU                             | 0.0121   | 0.0100  | 1.2177  | 0.2233 | -0.0074   | 0.0316  |     |
| Year                           | 0.0266   | 0.0191  | 1.3974  | 0.1623 | -0.0107   | 0.0640  |     |
| Proportion_Male                | 0.6070   | 0.3966  | 1.5305  | 0.1259 | -0.1703   | 1.3843  |     |
| Mean_Age                       | -0.0157  | 0.0207  | -0.7555 | 0.4500 | -0.0563   | 0.0250  |     |
| Mean_daysweek                  | 0.0027   | 0.0599  | 0.0444  | 0.9646 | -0.1147   | 0.1201  |     |
| Years_use                      | 0.0006   | 0.0188  | 0.0301  | 0.9760 | -0.0362   | 0.0374  |     |
| ASI_Drug                       | -0.1133  | 0.5166  | -0.2194 | 0.8263 | -1.1258   | 0.8991  |     |
| Complete                       | 2.7060   | 0.3305  | 8.1880  | <.0001 | 2.0583    | 3.3538  | *** |

---  
 Signif. codes: 0 '\*\*\*' 0.001 '\*\*' 0.01 '\*' 0.05 '.' 0.1 ' ' 1

[1] ICC = 0.548  
 [1] ModelI2I2 = 71.5879261626329

[1] Collinearity diagnostics for Model 2

Call:  
 imcdiag(x = x, y = y, method = method, corr = FALSE, vif = vif,  
 tol = tol, conf = conf, cvif = cvif, leamer = leamer, all = all)

All Individual Multicollinearity Diagnostics Result

|                                | VIF    | TOL    | Wi      | Fi      | Leamer | CVIF   | Klein |
|--------------------------------|--------|--------|---------|---------|--------|--------|-------|
| factor(Anticonvulsants)1       | 1.4952 | 0.6688 | 7.1417  | 7.4472  | 0.8178 | 1.5336 | 0     |
| factor(Antidepressants)1       | 1.4268 | 0.7009 | 6.1552  | 6.4185  | 0.8372 | 1.4634 | 0     |
| factor(Antipsychotics)1        | 1.3828 | 0.7232 | 5.5216  | 5.7578  | 0.8504 | 1.4183 | 0     |
| factor(ContingencyManagement)1 | 1.3585 | 0.7361 | 5.1702  | 5.3914  | 0.8580 | 1.3934 | 0     |
| factor(DopamineAgonists)1      | 1.5988 | 0.6255 | 8.6367  | 9.0062  | 0.7909 | 1.6399 | 0     |
| factor(MiscMeds)1              | 2.2159 | 0.4513 | 17.5374 | 18.2875 | 0.6718 | 2.2728 | 0     |
| factor(Opioid)1                | 2.3580 | 0.4241 | 19.5859 | 20.4236 | 0.6512 | 2.4185 | 1     |
| factor(Other)1                 | 1.4895 | 0.6714 | 7.0603  | 7.3622  | 0.8194 | 1.5278 | 0     |
| factor(Placebo)1               | 3.0393 | 0.3290 | 29.4128 | 30.6708 | 0.5736 | 3.1173 | 1     |
| factor(Psychotherapy)1         | 1.3510 | 0.7402 | 5.0626  | 5.2791  | 0.8603 | 1.3857 | 0     |
| factor(Psychostimulants)1      | 1.4826 | 0.6745 | 6.9608  | 7.2585  | 0.8213 | 1.5207 | 0     |

```

factor(Double_Blind)1      3.0571 0.3271 29.6693 30.9384 0.5719 3.1356 1
factor(Multisite)1       1.3982 0.7152  5.7438  5.9894 0.8457 1.4341 0
factor(Randomized)1     1.4222 0.7031  6.0897  6.3502 0.8385 1.4587 0
factor(BaselineType)2   1.9306 0.5180 13.4224 13.9966 0.7197 1.9802 0
factor(BaselineType)3   1.7228 0.5804 10.4252 10.8711 0.7619 1.7671 0
factor(CokeFreeOutcome_Type)2 2.1205 0.4716 16.1608 16.8520 0.6867 2.1749 0
factor(CokeFreeOutcome_Type)3 1.5603 0.6409  8.0806  8.4263 0.8006 1.6003 0
factor(CokeFreeOutcome_Type)4 2.5241 0.3962 21.9829 22.9232 0.6294 2.5890 1
FU                        1.2642 0.7910  3.8102  3.9732 0.8894 1.2966 0
Year                     1.5696 0.6371  8.2160  8.5674 0.7982 1.6099 0
Proportion_Male         1.5333 0.6522  7.6913  8.0203 0.8076 1.5726 0
Mean_Age                1.6699 0.5988  9.6621 10.0754 0.7738 1.7128 0
Mean_daysweek           1.4628 0.6836  6.6745  6.9599 0.8268 1.5003 0
Years_use               1.8348 0.5450 12.0397 12.5546 0.7383 1.8819 0
ASI_Drug                1.8447 0.5421 12.1827 12.7038 0.7363 1.8920 0
Complete                1.5074 0.6634  7.3179  7.6309 0.8145 1.5461 0

```

```

1 --> COLLINEARITY is detected by the test
0 --> COLLINEARITY is not detected by the test

```

```

factor(Anticonvulsants)1 , factor(Antidepressants)1 , factor(Antipsychotics)1 ,
factor(DopamineAgonists)1 , factor(MiscMeds)1 , factor(Opioid)1 , factor(Other)1 , factor(Placebo)1
, factor(Psychotherapy)1 , factor(Psychostimulants)1 , factor(Double_Blind)1 , factor(Multisite)1 ,
factor(Randomized)1 , FU , Proportion_Male , Mean_daysweek , Years_use , ASI_Drug , coefficient(s)
are non-significant may be due to multicollinearity

```

R-square of y on all x: 0.5673

```

* use method argument to check which regressors may be the reason of collinearity
=====

```

```
[1] Model3
```

```
Multivariate Meta-Analysis Model (k = 402; method: REML)
```

Variance Components:

|                      | estim  | sqrt   | nlvls | fixed | factor         |
|----------------------|--------|--------|-------|-------|----------------|
| sigma <sup>2.1</sup> | 0.5716 | 0.7560 | 98    | no    | Author         |
| sigma <sup>2.2</sup> | 0.5447 | 0.7380 | 157   | no    | Author/StudyID |

```

Test for Residual Heterogeneity:
QE(df = 374) = 875.5325, p-val < .0001

```

```

Test of Moderators (coefficient(s)
2,3,4,5,6,7,8,9,10,11,12,13,14,15,16,17,18,19,20,21,22,23,24,25,26,27,28) :
QM(df = 27) = 253.7804, p-val < .0001

```

Model Results:

|                                | estimate | se      | zval    | pval   | ci.lb    | ci.ub   |     |
|--------------------------------|----------|---------|---------|--------|----------|---------|-----|
| intrcpt                        | -8.2694  | 38.3076 | -0.2159 | 0.8291 | -83.3509 | 66.8121 |     |
| factor(Anticonvulsants)1       | 0.1396   | 0.3210  | 0.4348  | 0.6637 | -0.4896  | 0.7688  |     |
| factor(Antidepressants)1       | 0.0981   | 0.3490  | 0.2812  | 0.7786 | -0.5860  | 0.7823  |     |
| factor(Antipsychotics)1        | -0.2276  | 0.3905  | -0.5828 | 0.5600 | -0.9929  | 0.5378  |     |
| factor(ContingencyManagement)1 | 0.6967   | 0.1156  | 6.0295  | <.0001 | 0.4702   | 0.9232  | *** |
| factor(DopamineAgonists)1      | -0.1179  | 0.3160  | -0.3730 | 0.7092 | -0.7371  | 0.5014  |     |
| factor(MiscMeds)1              | -0.1623  | 0.2791  | -0.5816 | 0.5608 | -0.7093  | 0.3847  |     |
| factor(Opioid)1                | 0.1490   | 0.2253  | 0.6612  | 0.5085 | -0.2926  | 0.5905  |     |
| factor(Other)1                 | 0.0367   | 0.2963  | 0.1238  | 0.9014 | -0.5441  | 0.6175  |     |
| factor(Placebo)1               | -0.2478  | 0.2503  | -0.9900 | 0.3222 | -0.7383  | 0.2428  |     |
| factor(Psychotherapy)1         | -0.0811  | 0.1752  | -0.4631 | 0.6433 | -0.4245  | 0.2622  |     |
| factor(Psychostimulants)1      | 0.1496   | 0.3049  | 0.4907  | 0.6237 | -0.4480  | 0.7472  |     |
| factor(Double_Blind)1          | -0.1547  | 0.2929  | -0.5282 | 0.5974 | -0.7288  | 0.4194  |     |
| factor(Multisite)1             | 0.2394   | 0.3122  | 0.7668  | 0.4432 | -0.3725  | 0.8513  |     |
| factor(Randomized)1            | 0.2369   | 0.3644  | 0.6500  | 0.5157 | -0.4774  | 0.9512  |     |
| factor(BaselineType)2          | -1.2602  | 0.2179  | -5.7830 | <.0001 | -1.6874  | -0.8331 | *** |
| factor(BaselineType)3          | -1.4074  | 0.2027  | -6.9449 | <.0001 | -1.8046  | -1.0102 | *** |
| factor(CokeFreeOutcome_Type)2  | -0.1989  | 0.2459  | -0.8088 | 0.4186 | -0.6810  | 0.2831  |     |



|                               |         |        |         |        |         |         |     |
|-------------------------------|---------|--------|---------|--------|---------|---------|-----|
| factor(CokeFreeOutcome_Type)3 | -0.7863 | 0.4652 | -1.6901 | 0.0910 | -1.6981 | 0.1255  | .   |
| factor(CokeFreeOutcome_Type)4 | -1.2362 | 0.2965 | -4.1695 | <.0001 | -1.8173 | -0.6551 | *** |
| FU                            | 0.0196  | 0.0100 | 1.9557  | 0.0505 | -0.0000 | 0.0392  | .   |
| Year                          | 0.0031  | 0.0193 | 0.1589  | 0.8738 | -0.0347 | 0.0408  | .   |
| Proportion_Male               | 0.9844  | 0.4008 | 2.4561  | 0.0140 | 0.1988  | 1.7699  | *   |
| Mean_Age                      | 0.0149  | 0.0207 | 0.7194  | 0.4719 | -0.0257 | 0.0556  | .   |
| Mean_daysweek                 | 0.1549  | 0.0606 | 2.5570  | 0.0106 | 0.0362  | 0.2736  | *   |
| Years_use                     | 0.0044  | 0.0197 | 0.2234  | 0.8232 | -0.0342 | 0.0430  | .   |
| ASI_Drug                      | -0.3329 | 0.4529 | -0.7349 | 0.4624 | -1.2206 | 0.5549  | .   |
| Complete                      | 2.6701  | 0.3339 | 7.9979  | <.0001 | 2.0158  | 3.3245  | *** |

---

Signif. codes: 0 '\*\*\*' 0.001 '\*\*' 0.01 '\*' 0.05 '.' 0.1 ' ' 1

[1] ICC = 0.512  
 [1] Model3I2 = 72.7824694740359

[1] Collinearity diagnostics for Model 3

Call:  
 imcdiag(x = x, y = y, method = method, corr = FALSE, vif = vif,  
 tol = tol, conf = conf, cvif = cvif, leamer = leamer, all = all)

All Individual Multicollinearity Diagnostics Result

|                                | VIF    | TOL    | Wi      | Fi      | Leamer | CVIF   | Klein |
|--------------------------------|--------|--------|---------|---------|--------|--------|-------|
| factor(Anticonvulsants)1       | 1.4893 | 0.6714 | 7.0575  | 7.3593  | 0.8194 | 2.2391 | 0     |
| factor(Antidepressants)1       | 1.4420 | 0.6935 | 6.3745  | 6.6472  | 0.8328 | 2.1679 | 0     |
| factor(Antipsychotics)1        | 1.4228 | 0.7028 | 6.0981  | 6.3589  | 0.8384 | 2.1391 | 0     |
| factor(ContingencyManagement)1 | 1.3772 | 0.7261 | 5.4411  | 5.6738  | 0.8521 | 2.0706 | 0     |
| factor(DopamineAgonists)1      | 1.5852 | 0.6308 | 8.4410  | 8.8021  | 0.7942 | 2.3833 | 0     |
| factor(MiscMeds)1              | 2.2172 | 0.4510 | 17.5560 | 18.3070 | 0.6716 | 3.3334 | 0     |
| factor(Opioid)1                | 2.0919 | 0.4780 | 15.7481 | 16.4217 | 0.6914 | 3.1449 | 0     |
| factor(Other)1                 | 1.4725 | 0.6791 | 6.8153  | 7.1069  | 0.8241 | 2.2138 | 0     |
| factor(Placebo)1               | 3.0632 | 0.3265 | 29.7572 | 31.0301 | 0.5714 | 4.6052 | 1     |
| factor(Psychotherapy)1         | 1.3894 | 0.7197 | 5.6160  | 5.8562  | 0.8484 | 2.0888 | 0     |
| factor(Psychostimulants)1      | 1.5006 | 0.6664 | 7.2202  | 7.5291  | 0.8163 | 2.2560 | 0     |
| factor(Double_Blind)1          | 3.2153 | 0.3110 | 31.9508 | 33.3174 | 0.5577 | 4.8339 | 1     |
| factor(Multisite)1             | 1.3705 | 0.7296 | 5.3441  | 5.5726  | 0.8542 | 2.0605 | 0     |
| factor(Randomized)1            | 1.4024 | 0.7130 | 5.8045  | 6.0528  | 0.8444 | 2.1085 | 0     |
| factor(BaselineType)2          | 2.0056 | 0.4986 | 14.5039 | 15.1243 | 0.7061 | 3.0152 | 0     |
| factor(BaselineType)3          | 2.0617 | 0.4850 | 15.3133 | 15.9683 | 0.6964 | 3.0996 | 0     |
| factor(CokeFreeOutcome_Type)2  | 2.0371 | 0.4909 | 14.9588 | 15.5987 | 0.7006 | 3.0627 | 0     |
| factor(CokeFreeOutcome_Type)3  | 1.6676 | 0.5997 | 9.6290  | 10.0409 | 0.7744 | 2.5071 | 0     |
| factor(CokeFreeOutcome_Type)4  | 2.3050 | 0.4338 | 18.8219 | 19.6270 | 0.6587 | 3.4653 | 0     |
| FU                             | 1.2399 | 0.8065 | 3.4599  | 3.6079  | 0.8981 | 1.8641 | 0     |
| Year                           | 1.5890 | 0.6293 | 8.4953  | 8.8587  | 0.7933 | 2.3889 | 0     |
| Proportion_Male                | 1.4287 | 0.6999 | 6.1834  | 6.4478  | 0.8366 | 2.1479 | 0     |
| Mean_Age                       | 1.5845 | 0.6311 | 8.4306  | 8.7912  | 0.7944 | 2.3822 | 0     |
| Mean_daysweek                  | 1.6131 | 0.6199 | 8.8435  | 9.2217  | 0.7873 | 2.4252 | 0     |
| Years_use                      | 1.9593 | 0.5104 | 13.8356 | 14.4274 | 0.7144 | 2.9456 | 0     |
| ASI_Drug                       | 1.4401 | 0.6944 | 6.3479  | 6.6194  | 0.8333 | 2.1651 | 0     |
| Complete                       | 1.5483 | 0.6459 | 7.9080  | 8.2463  | 0.8037 | 2.3277 | 0     |

1 --> COLLINEARITY is detected by the test  
 0 --> COLLINEARITY is not detected by the test

factor(Anticonvulsants)1 , factor(Antidepressants)1 , factor(Antipsychotics)1 ,  
 factor(DopamineAgonists)1 , factor(MiscMeds)1 , factor(Opioid)1 , factor(Other)1 , factor(Placebo)1 ,  
 factor(Psychotherapy)1 , factor(Psychostimulants)1 , factor(Double\_Blind)1 , factor(Multisite)1 ,  
 factor(Randomized)1 , factor(CokeFreeOutcome\_Type)2 , Year , Mean\_Age , Mean\_daysweek , ASI\_Drug ,  
 coefficient(s) are non-significant may be due to multicollinearity

R-square of y on all x: 0.5821

\* use method argument to check which regressors may be the reason of collinearity  
 =====

[1] Model4

Multivariate Meta-Analysis Model (k = 402; method: REML)

Variance Components:

|           | estim  | sqrt   | nlvls | fixed | factor         |
|-----------|--------|--------|-------|-------|----------------|
| sigma^2.1 | 0.4262 | 0.6529 | 98    | no    | Author         |
| sigma^2.2 | 0.7074 | 0.8411 | 157   | no    | Author/StudyID |

Test for Residual Heterogeneity:

QE(df = 374) = 848.2921, p-val < .0001

Test of Moderators (coefficient(s)

2, 3, 4, 5, 6, 7, 8, 9, 10, 11, 12, 13, 14, 15, 16, 17, 18, 19, 20, 21, 22, 23, 24, 25, 26, 27, 28) :

QM(df = 27) = 190.1784, p-val < .0001

Model Results:

|                                | estimate | se      | zval    | pval   | ci.lb     | ci.ub   |     |
|--------------------------------|----------|---------|---------|--------|-----------|---------|-----|
| intrcpt                        | -27.8369 | 41.5269 | -0.6703 | 0.5026 | -109.2282 | 53.5544 |     |
| factor(Anticonvulsants)1       | -0.0367  | 0.3461  | -0.1062 | 0.9154 | -0.7151   | 0.6416  |     |
| factor(Antidepressants)1       | 0.1737   | 0.3788  | 0.4584  | 0.6466 | -0.5688   | 0.9161  |     |
| factor(Antipsychotics)1        | -0.2175  | 0.4084  | -0.5326 | 0.5943 | -1.0180   | 0.5830  |     |
| factor(ContingencyManagement)1 | 0.6132   | 0.1313  | 4.6694  | <.0001 | 0.3558    | 0.8706  | *** |
| factor(DopamineAgonists)1      | -0.1425  | 0.3290  | -0.4332 | 0.6648 | -0.7873   | 0.5022  |     |
| factor(MiscMeds)1              | -0.2456  | 0.2982  | -0.8235 | 0.4102 | -0.8301   | 0.3389  |     |
| factor(Opioid)1                | -0.1019  | 0.2362  | -0.4316 | 0.6661 | -0.5648   | 0.3610  |     |
| factor(Other)1                 | -0.0203  | 0.3276  | -0.0620 | 0.9505 | -0.6624   | 0.6217  |     |
| factor(Placebo)1               | -0.3359  | 0.2634  | -1.2751 | 0.2023 | -0.8522   | 0.1804  |     |
| factor(Psychotherapy)1         | -0.0670  | 0.1969  | -0.3406 | 0.7334 | -0.4529   | 0.3188  |     |
| factor(Psychostimulants)1      | 0.3143   | 0.3194  | 0.9840  | 0.3251 | -0.3117   | 0.9403  |     |
| factor(Double_Blind)1          | -0.1646  | 0.3097  | -0.5316 | 0.5950 | -0.7716   | 0.4424  |     |
| factor(Multisite)1             | 0.0493   | 0.3500  | 0.1409  | 0.8880 | -0.6367   | 0.7353  |     |
| factor(Randomized)1            | -0.2831  | 0.3972  | -0.7128 | 0.4760 | -1.0615   | 0.4954  |     |
| factor(BaselineType)2          | -1.6361  | 0.2411  | -6.7869 | <.0001 | -2.1086   | -1.1636 | *** |
| factor(BaselineType)3          | -0.9993  | 0.2525  | -3.9573 | <.0001 | -1.4942   | -0.5044 | *** |
| factor(CokeFreeOutcome_Type)2  | 0.5004   | 0.2848  | 1.7572  | 0.0789 | -0.0578   | 1.0586  | .   |
| factor(CokeFreeOutcome_Type)3  | 0.0131   | 0.4475  | 0.0293  | 0.9767 | -0.8640   | 0.8902  |     |
| factor(CokeFreeOutcome_Type)4  | 1.0985   | 0.3163  | 3.4733  | 0.0005 | 0.4786    | 1.7184  | *** |
| FU                             | 0.0324   | 0.0116  | 2.7899  | 0.0053 | 0.0096    | 0.0552  | **  |
| Year                           | 0.0139   | 0.0209  | 0.6647  | 0.5062 | -0.0270   | 0.0548  |     |
| Proportion_Male                | 0.6748   | 0.4233  | 1.5944  | 0.1108 | -0.1547   | 1.5044  |     |
| Mean Age                       | -0.0287  | 0.0207  | -1.3862 | 0.1657 | -0.0692   | 0.0119  |     |
| Mean_daysweek                  | 0.1681   | 0.0636  | 2.6445  | 0.0082 | 0.0435    | 0.2927  | **  |
| Years_use                      | 0.0044   | 0.0196  | 0.2256  | 0.8215 | -0.0341   | 0.0429  |     |
| ASI Drug                       | 0.5253   | 0.8381  | 0.6269  | 0.5308 | -1.1172   | 2.1679  |     |
| Complete                       | 2.6427   | 0.3704  | 7.1347  | <.0001 | 1.9167    | 3.3687  | *** |

---

Signif. codes: 0 '\*\*\*' 0.001 '\*\*' 0.01 '\*' 0.05 '.' 0.1 ' ' 1

[1] ICC = 0.376

[1] Model4I2 = 68.3514959518097

[1] Collinearity diagnostics for Model 4

Call:

imcdiag(x = x, y = y, method = method, corr = FALSE, vif = vif, tol = tol, conf = conf, cvif = cvif, leamer = leamer, all = all)

All Individual Multicollinearity Diagnostics Result

|                                | VIF    | TOL    | Wi     | Fi     | Leamer | CVIF   | Klein |
|--------------------------------|--------|--------|--------|--------|--------|--------|-------|
| factor(Anticonvulsants)1       | 1.5457 | 0.6470 | 7.8700 | 8.2066 | 0.8043 | 2.2177 | 0     |
| factor(Antidepressants)1       | 1.4642 | 0.6830 | 6.6946 | 6.9809 | 0.8264 | 2.1008 | 0     |
| factor(Antipsychotics)1        | 1.4013 | 0.7136 | 5.7873 | 6.0348 | 0.8448 | 2.0106 | 0     |
| factor(ContingencyManagement)1 | 1.3508 | 0.7403 | 5.0591 | 5.2755 | 0.8604 | 1.9381 | 0     |

```

factor(DopamineAgonists)1      1.5890 0.6293  8.4948  8.8582 0.7933 2.2799  0
factor(MiscMeds)1             2.2594 0.4426 18.1640 18.9410 0.6653 3.2418  1
factor(Opioid)1               1.9329 0.5174 13.4552 14.0307 0.7193 2.7734  0
factor(Other)1                1.5120 0.6614  7.3853  7.7012 0.8132 2.1695  0
factor(Placebo)1              3.1213 0.3204 30.5951 31.9037 0.5660 4.4785  1
factor(Psychotherapy)1        1.3892 0.7198  5.6138  5.8540 0.8484 1.9933  0
factor(Psychostimulants)1     1.4870 0.6725  7.0247  7.3252 0.8200 2.1337  0
factor(Double_Blind)1          3.0489 0.3280 29.5516 30.8157 0.5727 4.3747  1
factor(Multisite)1            1.4895 0.6714  7.0597  7.3616 0.8194 2.1371  0
factor(Randomized)1           1.4450 0.6921  6.4177  6.6922 0.8319 2.0733  0
factor(BaselineType)2         1.8839 0.5308 12.7492 13.2945 0.7286 2.7031  0
factor(BaselineType)3         1.7260 0.5794 10.4715 10.9194 0.7612 2.4765  0
factor(CokeFreeOutcome_Type)2 2.6571 0.3764 23.9005 24.9228 0.6135 3.8125  1
factor(CokeFreeOutcome_Type)3 1.3493 0.7411  5.0377  5.2532 0.8609 1.9360  0
factor(CokeFreeOutcome_Type)4 2.2290 0.4486 17.7260 18.4842 0.6698 3.1982  1
FU                             1.2697 0.7876  3.8903  4.0567 0.8875 1.8218  0
Year                           1.7230 0.5804 10.4281 10.8741 0.7618 2.4722  0
Proportion_Male                1.4179 0.7053  6.0273  6.2851 0.8398 2.0344  0
Mean_Age                       1.3934 0.7177  5.6740  5.9167 0.8472 1.9993  0
Mean_daysweek                  1.3241 0.7552  4.6742  4.8741 0.8690 1.8998  0
Years_use                       1.2401 0.8064  3.4628  3.6109 0.8980 1.7793  0
ASI_Drug                       1.9449 0.5142 13.6289 14.2118 0.7170 2.7906  0
Complete                       1.5654 0.6388  8.1550  8.5038 0.7993 2.2461  0

```

```

1 --> COLLINEARITY is detected by the test
0 --> COLLINEARITY is not detected by the test

```

```

factor(Anticonvulsants)1 , factor(Antidepressants)1 , factor(Antipsychotics)1 ,
factor(ContingencyManagement)1 , factor(DopamineAgonists)1 , factor(MiscMeds)1 , factor(Opioid)1 ,
factor(Other)1 , factor(Psychotherapy)1 , factor(Psychostimulants)1 , factor(Double_Blind)1 ,
factor(Multisite)1 , factor(Randomized)1 , factor(CokeFreeOutcome_Type)3 , Year , Proportion_Male ,
Mean_Age , Years_use , ASI_Drug , coefficient(s) are non-significant may be due to
multicollinearity

```

R-square of y on all x: 0.5084

```

* use method argument to check which regressors may be the reason of collinearity
=====

```

```
[1] Model5
```

Multivariate Meta-Analysis Model (k = 402; method: REML)

Variance Components:

|                      | estim  | sqrt   | nlvls | fixed | factor         |
|----------------------|--------|--------|-------|-------|----------------|
| sigma <sup>2.1</sup> | 0.1245 | 0.3529 | 98    | no    | Author         |
| sigma <sup>2.2</sup> | 1.0443 | 1.0219 | 157   | no    | Author/StudyID |

```

Test for Residual Heterogeneity:
QE(df = 374) = 929.9673, p-val < .0001

```

```

Test of Moderators (coefficient(s)
2,3,4,5,6,7,8,9,10,11,12,13,14,15,16,17,18,19,20,21,22,23,24,25,26,27,28) :
QM(df = 27) = 198.4783, p-val < .0001

```

Model Results:

|                                       | estimate      | se            | zval          | pval             | ci.lb         | ci.ub             |
|---------------------------------------|---------------|---------------|---------------|------------------|---------------|-------------------|
| intrcpt                               | -16.2073      | 41.0720       | -0.3946       | 0.6931           | -96.7070      | 64.2923           |
| factor(Anticonvulsants)1              | 0.2205        | 0.3448        | 0.6395        | 0.5225           | -0.4553       | 0.8963            |
| factor(Antidepressants)1              | 0.3921        | 0.3822        | 1.0259        | 0.3049           | -0.3570       | 1.1413            |
| factor(Antipsychotics)1               | -0.4160       | 0.4011        | -1.0372       | 0.2996           | -1.2021       | 0.3701            |
| <b>factor(ContingencyManagement)1</b> | <b>0.6595</b> | <b>0.1262</b> | <b>5.2272</b> | <b>&lt;.0001</b> | <b>0.4122</b> | <b>0.9068 ***</b> |
| factor(DopamineAgonists)1             | -0.1726       | 0.3309        | -0.5216       | 0.6019           | -0.8213       | 0.4760            |
| factor(MiscMeds)1                     | -0.1214       | 0.2947        | -0.4122       | 0.6802           | -0.6990       | 0.4561            |
| factor(Opioid)1                       | 0.3590        | 0.2298        | 1.5623        | 0.1182           | -0.0914       | 0.8094            |
| factor(Other)1                        | 0.0644        | 0.3042        | 0.2118        | 0.8322           | -0.5318       | 0.6607            |
| factor(Placebo)1                      | -0.2158       | 0.2633        | -0.8196       | 0.4124           | -0.7318       | 0.3002            |

|                               |         |        |         |        |         |         |     |
|-------------------------------|---------|--------|---------|--------|---------|---------|-----|
| factor(Psychotherapy)1        | -0.0003 | 0.1838 | -0.0016 | 0.9987 | -0.3605 | 0.3599  |     |
| factor(Psychostimulants)1     | 0.3049  | 0.3193 | 0.9551  | 0.3395 | -0.3208 | 0.9306  |     |
| factor(Double_Blind)1         | 0.4158  | 0.3025 | 1.3747  | 0.1692 | -0.1770 | 1.0087  |     |
| factor(Multisite)1            | -0.3247 | 0.3479 | -0.9333 | 0.3506 | -1.0065 | 0.3571  |     |
| factor(Randomized)1           | -0.6251 | 0.3957 | -1.5799 | 0.1141 | -1.4007 | 0.1504  |     |
| factor(BaselineType)2         | -1.2107 | 0.2232 | -5.4241 | <.0001 | -1.6482 | -0.7732 | *** |
| factor(BaselineType)3         | -0.3264 | 0.2317 | -1.4086 | 0.1590 | -0.7805 | 0.1278  |     |
| factor(CokeFreeOutcome_Type)2 | -0.2757 | 0.2989 | -0.9225 | 0.3563 | -0.8615 | 0.3101  |     |
| factor(CokeFreeOutcome_Type)3 | -1.1853 | 0.4558 | -2.6003 | 0.0093 | -2.0788 | -0.2919 | **  |
| factor(CokeFreeOutcome_Type)4 | 0.9762  | 0.3214 | 3.0371  | 0.0024 | 0.3462  | 1.6062  | **  |
| FU                            | 0.0244  | 0.0115 | 2.1194  | 0.0341 | 0.0018  | 0.0470  | *   |
| Year                          | 0.0074  | 0.0206 | 0.3605  | 0.7185 | -0.0330 | 0.0479  |     |
| Proportion_Male               | 0.7174  | 0.4220 | 1.6998  | 0.0892 | -0.1098 | 1.5445  | .   |
| Mean_Age                      | 0.0034  | 0.0208 | 0.1639  | 0.8698 | -0.0374 | 0.0442  |     |
| Mean_daysweek                 | 0.1000  | 0.0676 | 1.4781  | 0.1394 | -0.0326 | 0.2325  |     |
| Years_use                     | 0.0079  | 0.0195 | 0.4030  | 0.6870 | -0.0304 | 0.0462  |     |
| ASI_Drug                      | 0.1406  | 0.5208 | 0.2700  | 0.7872 | -0.8801 | 1.1613  |     |
| Complete                      | 2.3499  | 0.3653 | 6.4322  | <.0001 | 1.6338  | 3.0659  | *** |

---

Signif. codes: 0 '\*\*\*' 0.001 '\*\*' 0.01 '\*' 0.05 '.' 0.1 ' ' 1

[1] ICC = 0.107

[1] Model5I2 = 71.1384534650972

[1] Collinearity diagnostics for Model 5

Call:

```
imcdiag(x = x, y = y, method = method, corr = FALSE, vif = vif,
        tol = tol, conf = conf, cvif = cvif, leamer = leamer, all = all)
```

#### All Individual Multicollinearity Diagnostics Result

|                                | VIF    | TOL    | Wi      | Fi      | Leamer | CVIF   | Klein |
|--------------------------------|--------|--------|---------|---------|--------|--------|-------|
| factor(Anticonvulsants)1       | 1.5278 | 0.6545 | 7.6126  | 7.9383  | 0.8090 | 2.5635 | 0     |
| factor(Antidepressants)1       | 1.4345 | 0.6971 | 6.2673  | 6.5354  | 0.8349 | 2.4070 | 0     |
| factor(Antipsychotics)1        | 1.4288 | 0.6999 | 6.1848  | 6.4493  | 0.8366 | 2.3974 | 0     |
| factor(ContingencyManagement)1 | 1.3794 | 0.7249 | 5.4728  | 5.7069  | 0.8514 | 2.3146 | 0     |
| factor(DopamineAgonists)1      | 1.5824 | 0.6319 | 8.4003  | 8.7596  | 0.7949 | 2.6552 | 0     |
| factor(MiscMeds)1              | 2.2391 | 0.4466 | 17.8713 | 18.6358 | 0.6683 | 3.7570 | 1     |
| factor(Opioid)1                | 1.8683 | 0.5352 | 12.5238 | 13.0594 | 0.7316 | 3.1349 | 0     |
| factor(Other)1                 | 1.4926 | 0.6700 | 7.1047  | 7.4086  | 0.8185 | 2.5044 | 0     |
| factor(Placebo)1               | 3.0955 | 0.3230 | 30.2238 | 31.5166 | 0.5684 | 5.1940 | 1     |
| factor(Psychotherapy)1         | 1.4080 | 0.7102 | 5.8842  | 6.1359  | 0.8428 | 2.3624 | 0     |
| factor(Psychostimulants)1      | 1.4849 | 0.6734 | 6.9944  | 7.2936  | 0.8206 | 2.4916 | 0     |
| factor(Double_Blind)1          | 2.9566 | 0.3382 | 28.2199 | 29.4270 | 0.5816 | 4.9609 | 1     |
| factor(Multisite)1             | 1.3628 | 0.7338 | 5.2330  | 5.4568  | 0.8566 | 2.2867 | 0     |
| factor(Randomized)1            | 1.4199 | 0.7043 | 6.0563  | 6.3154  | 0.8392 | 2.3825 | 0     |
| factor(BaselineType)2          | 1.9921 | 0.5020 | 14.3096 | 14.9216 | 0.7085 | 3.3426 | 1     |
| factor(BaselineType)3          | 2.0068 | 0.4983 | 14.5207 | 15.1418 | 0.7059 | 3.3672 | 1     |
| factor(CokeFreeOutcome_Type)2  | 3.0369 | 0.3293 | 29.3777 | 30.6343 | 0.5738 | 5.0956 | 1     |
| factor(CokeFreeOutcome_Type)3  | 1.3292 | 0.7523 | 4.7486  | 4.9517  | 0.8674 | 2.2303 | 0     |
| factor(CokeFreeOutcome_Type)4  | 2.1059 | 0.4749 | 15.9501 | 16.6324 | 0.6891 | 3.5335 | 1     |
| FU                             | 1.2335 | 0.8107 | 3.3681  | 3.5122  | 0.9004 | 2.0697 | 0     |
| Year                           | 1.6533 | 0.6049 | 9.4224  | 9.8254  | 0.7777 | 2.7741 | 0     |
| Proportion_Male                | 1.4196 | 0.7044 | 6.0524  | 6.3113  | 0.8393 | 2.3820 | 0     |
| Mean_Age                       | 1.4054 | 0.7115 | 5.8469  | 6.0970  | 0.8435 | 2.3581 | 0     |
| Mean_daysweek                  | 1.4031 | 0.7127 | 5.8143  | 6.0630  | 0.8442 | 2.3543 | 0     |
| Years_use                      | 1.7186 | 0.5819 | 10.3648 | 10.8081 | 0.7628 | 2.8837 | 0     |
| ASI_Drug                       | 2.2982 | 0.4351 | 18.7233 | 19.5242 | 0.6596 | 3.8561 | 1     |
| Complete                       | 1.5202 | 0.6578 | 7.5026  | 7.8235  | 0.8111 | 2.5507 | 0     |

1 --> COLLINEARITY is detected by the test

0 --> COLLINEARITY is not detected by the test

factor(Anticonvulsants)1 , factor(Antidepressants)1 , factor(Antipsychotics)1 ,  
 factor(DopamineAgonists)1 , factor(MiscMeds)1 , factor(Other)1 , factor(Placebo)1 ,  
 factor(Psychotherapy)1 , factor(Psychostimulants)1 , factor(Double\_Blind)1 , factor(Multisite)1 ,

factor(CokeFreeOutcome\_Type)2 , Year , Mean\_Age , Mean\_daysweek , Years\_use , ASI\_Drug ,  
 coefficient(s) are non-significant may be due to multicollinearity

R-square of y on all x: 0.485

\* use method argument to check which regressors may be the reason of collinearity

[1] Pooled Results

|                                |             |     | est           | se          | t           | df         | Pr(> t )       |
|--------------------------------|-------------|-----|---------------|-------------|-------------|------------|----------------|
| intrcpt                        |             |     | -34.097987842 | 48.27044216 | -0.70639477 | 37.857740  | 4.842677e-01 - |
| 1.318284e+02                   | 63.63247374 | NA  |               |             |             |            |                |
| factor(Anticonvulsants)1       |             |     | 0.115818029   | 0.41784647  | 0.27717843  | 28.572466  | 7.836386e-01 - |
| 7.393297e-01                   | 0.97096580  | NA  |               |             |             |            |                |
| factor(Antidepressants)1       |             |     | 0.215154030   | 0.39085017  | 0.55047700  | 190.047517 | 5.826387e-01 - |
| 5.558077e-01                   | 0.98611578  | NA  |               |             |             |            |                |
| factor(Antipsychotics)1        |             |     | -0.241687050  | 0.43553775  | -0.55491642 | 132.476182 | 5.798876e-01 - |
| 1.103195e+00                   | 0.61982103  | NA  |               |             |             |            |                |
| factor(ContingencyManagement)1 |             |     | 0.637781370   | 0.14243518  | 4.47769554  | 56.536803  | 3.711791e-05   |
| 3.525092e-01                   | 0.92305355  | NA  |               |             |             |            |                |
| factor(DopamineAgonists)1      |             |     | -0.093583011  | 0.34910282  | -0.26806719 | 148.500996 | 7.890196e-01 - |
| 7.834338e-01                   | 0.59626774  | NA  |               |             |             |            |                |
| factor(MiscMeds)1              |             |     | -0.143916495  | 0.31716930  | -0.45375292 | 111.326331 | 6.508900e-01 - |
| 7.723883e-01                   | 0.48455534  | NA  |               |             |             |            |                |
| factor(Opioid)1                |             |     | 0.114973780   | 0.29958962  | 0.38377091  | 24.931905  | 7.044016e-01 - |
| 5.021281e-01                   | 0.73207561  | NA  |               |             |             |            |                |
| factor(Other)1                 |             |     | 0.045406318   | 0.32394027  | 0.14016880  | 247.431394 | 8.886407e-01 - |
| 5.926257e-01                   | 0.68343839  | NA  |               |             |             |            |                |
| factor(Placebo)1               |             |     | -0.223713055  | 0.27510297  | -0.81319754 | 180.765257 | 4.171746e-01 - |
| 7.665392e-01                   | 0.31911305  | NA  |               |             |             |            |                |
| factor(Psychotherapy)1         |             |     | -0.037615979  | 0.19541312  | -0.19249464 | 201.850777 | 8.475483e-01 - |
| 4.229289e-01                   | 0.34769691  | NA  |               |             |             |            |                |
| factor(Psychostimulants)1      |             |     | 0.308500622   | 0.35939394  | 0.85839127  | 62.444429  | 3.939594e-01 - |
| 4.098159e-01                   | 1.02681718  | NA  |               |             |             |            |                |
| factor(Double_Blind)1          |             |     | -0.025703282  | 0.48596819  | -0.05289087 | 10.410016  | 9.588201e-01 - |
| 1.102755e+00                   | 1.05134819  | NA  |               |             |             |            |                |
| factor(Multisite)1             |             |     | 0.085255912   | 0.43772651  | 0.19476982  | 22.104767  | 8.473522e-01 - |
| 8.222839e-01                   | 0.99279573  | NA  |               |             |             |            |                |
| factor(Randomized)1            |             |     | -0.031506711  | 0.60374099  | -0.05218581 | 10.728214  | 9.593396e-01 - |
| 1.364450e+00                   | 1.30143704  | NA  |               |             |             |            |                |
| factor(BaselineType)2          |             |     | -1.386003553  | 0.32400133  | -4.27777123 | 14.899684  | 6.701933e-04 - |
| 2.077001e+00                   | -0.69500589 | NA  |               |             |             |            |                |
| factor(BaselineType)3          |             |     | -0.960720049  | 0.88377489  | -1.08706421 | 3.880078   | 3.398770e-01 - |
| 3.444673e+00                   | 1.52323300  | NA  |               |             |             |            |                |
| factor(CokeFreeOutcome_Type)2  |             |     | 0.073855531   | 0.53841487  | 0.13717216  | 6.854665   | 8.948367e-01 - |
| 1.204786e+00                   | 1.35249699  | NA  |               |             |             |            |                |
| factor(CokeFreeOutcome_Type)3  |             |     | -0.472941367  | 0.89066435  | -0.53099842 | 6.946993   | 6.119662e-01 - |
| 2.582290e+00                   | 1.63640720  | NA  |               |             |             |            |                |
| factor(CokeFreeOutcome_Type)4  |             |     | 0.087029672   | 1.30305671  | 0.06678886  | 3.728623   | 9.501759e-01 - |
| 3.637086e+00                   | 3.81114559  | NA  |               |             |             |            |                |
| FU                             |             |     | 0.024718703   | 0.01514238  | 1.63241843  | 17.316998  | 1.206413e-01 - |
| 7.184438e-03                   | 0.05662184  | 0   |               |             |             |            |                |
| Year                           |             |     | 0.016551678   | 0.02435471  | 0.67960890  | 36.660928  | 5.010210e-01 - |
| 3.281106e-02                   | 0.06591442  | 0   |               |             |             |            |                |
| Proportion_Male                |             |     | 0.801982262   | 0.46672377  | 1.71832316  | 75.035505  | 8.986159e-02 - |
| 1.277720e-01                   | 1.73173648  | 11  |               |             |             |            |                |
| Mean_Age                       |             |     | -0.008654739  | 0.02844550  | -0.30425684 | 17.678523  | 7.644845e-01 - |
| 6.849452e-02                   | 0.05118504  | 10  |               |             |             |            |                |
| Mean_daysweek                  |             |     | 0.089927630   | 0.10339815  | 0.86972182  | 9.430174   | 4.060454e-01 - |
| 1.423588e-01                   | 0.32221409  | 128 |               |             |             |            |                |
| Years_use                      |             |     | -0.000291333  | 0.02290343  | -0.01272006 | 49.225874  | 9.899025e-01 - |
| 4.631215e-02                   | 0.04572948  | 166 |               |             |             |            |                |
| ASI_Drug                       |             |     | -0.037782728  | 0.72778119  | -0.05191495 | 32.349712  | 9.589157e-01 - |
| 1.519596e+00                   | 1.44403079  | 273 |               |             |             |            |                |
| Complete                       |             |     | 2.623178930   | 0.39553540  | 6.63197011  | 80.469772  | 3.508446e-09   |
| 1.836109e+00                   | 3.41024892  | 7   |               |             |             |            |                |

intrcpt fmi lambda  
 0.33472115 0.30047938

|                                  |            |            |
|----------------------------------|------------|------------|
| factor (Anticonvulsants) 1       | 0.39240330 | 0.35131125 |
| factor (Antidepressants) 1       | 0.10506271 | 0.09569397 |
| factor (Antipsychotics) 1        | 0.14616246 | 0.13336861 |
| factor (ContingencyManagement) 1 | 0.26358948 | 0.23799159 |
| factor (DopamineAgonists) 1      | 0.13284467 | 0.12124400 |
| factor (MiscMeds) 1              | 0.16728655 | 0.15245986 |
| factor (Opioid) 1                | 0.42285236 | 0.37833981 |
| factor (Other) 1                 | 0.07547906 | 0.06803619 |
| factor (Placebo) 1               | 0.11063222 | 0.10084632 |
| factor (Psychotherapy) 1         | 0.09837507 | 0.08948553 |
| factor (Psychostimulants) 1      | 0.24776678 | 0.22405364 |
| factor (Double_Blind) 1          | 0.65788407 | 0.59791642 |
| factor (Multisite) 1             | 0.45115128 | 0.40364171 |
| factor (Randomized) 1            | 0.64871599 | 0.58881190 |
| factor (BaselineType) 2          | 0.55326797 | 0.49707415 |
| factor (BaselineType) 3          | 0.95246607 | 0.93298526 |
| factor (CokeFreeOutcome_Type) 2  | 0.79012727 | 0.73668826 |
| factor (CokeFreeOutcome_Type) 3  | 0.78580860 | 0.73190359 |
| factor (CokeFreeOutcome_Type) 4  | 0.95924459 | 0.94200685 |
| FU                               | 0.51266287 | 0.45945141 |
| Year                             | 0.34096501 | 0.30596667 |
| Proportion_Male                  | 0.22019423 | 0.19968260 |
| Mean_Age                         | 0.50724306 | 0.45448119 |
| Mean_daysweek                    | 0.68840926 | 0.62866131 |
| Years_use                        | 0.28677969 | 0.25837917 |
| ASI_Drug                         | 0.36610943 | 0.32809467 |
| Complete                         | 0.21022826 | 0.19084016 |

### \*\*\*Egger's Test of Bias\*\*\*

```
#Author: Brandon S Bentzley
#Project: Meta analysis of treatments for cocaine use disorders
#Date this R script was last updated: 02/15/2021
#Description: Egger tests for bias, aka regression of funnel plots

# store the current directory
initial.dir<-getwd()
# change to the new directory
setwd("/Users/bsbentzley/Documents/Stanford/STAAR/2015.12.03 - DBS cocaine/Ranalysis")
# load the necessary libraries
library(gdata)
library(metafor)
# set the output file
sink("Output.out")
# set file width
options(width=120)
# load the dataset and define variable data types
mydata = read.csv("Data_imputed_long.csv", colClasses=c(
"Author"="character", "Year"="numeric", "Title"="character", "StudyID"="factor",
"Double_Blind"="factor", "Multisite"="factor", "Randomized"="factor", "SubDsrd"="character",
"Treatments"="character", "Placebo"="factor", "Psychotherapy"="factor",
"ContingencyManagement"="factor", "Other"="factor", "Opioid"="factor", "MiscMeds"="factor",
"Psychostimulants"="factor", "Anticonvulsants"="factor", "DopamineAgonists"="factor",
"Antidepressants"="factor", "Antipsychotics"="factor", "TreatmentNmbr"= "numeric",
"TrtmntlorMore"="factor", "N_start"="numeric", "Proportion_Male"="numeric", "Mean_Age"="numeric",
"Mean_daysweek"="numeric", "Proportion_30days"="numeric", "Years_use"="numeric",
"ASI_Drug"="numeric", "TestPosScreen"="factor", "CokeFreeBase"="numeric", "CokeFreeWk1"="numeric",
"BaselineType"="factor", "CokeFreeStart"="numeric", "Complication"="character", "FU"="numeric",
"Complete"="numeric", "CokeFreeLastWk_NotITT"="numeric", "CokeFreeMean_NotITT"="numeric",
"CokeFreeLastWk_ITT"="numeric", "CokeFreeMean_ITT"="numeric", "CokeFreeOutcome_Type"="factor",
"CokeFreeOutcome_ITT"="numeric", "CFS"="numeric", "CPS"="numeric", "CFE"="numeric",
"CPE"="numeric", "yi"="numeric", "vi"="numeric"))

#Loop through all treatment groups
for (i in c(1:11)){

#Select only data from a particular treatment category
if (i==1) {TRT="Placebo"
mydata_sub<-subset(mydata, Placebo==1)}
if (i==2) {TRT="Psychotherapy"
mydata_sub<-subset(mydata, Psychotherapy==1)}
if (i==3) {TRT="ContingencyManagement"
mydata_sub<-subset(mydata, ContingencyManagement==1)}
if (i==4) {TRT="Other"
mydata_sub<-subset(mydata, Other==1)}
if (i==5) {TRT="Opioid"
mydata_sub<-subset(mydata, Opioid==1)}
if (i==6) {TRT="MiscMeds"
mydata_sub<-subset(mydata, MiscMeds==1)}
if (i==7) {TRT="Psychostimulants"
mydata_sub<-subset(mydata, Psychostimulants==1)}
if (i==8) {TRT="Anticonvulsants"
mydata_sub<-subset(mydata, Anticonvulsants==1)}
if (i==9) {TRT="DopamineAgonists"
```

```

mydata_sub<-subset(mydata, DopamineAgonists==1)
if (i==10) {TRT="Antidepressants"
mydata_sub<-subset(mydata, Antidepressants==1)}
if (i==11) {TRT="Antipsychotics"
mydata_sub<-subset(mydata, Antipsychotics==1)}

#Loop through non-imputed and imputed data
for (j in c(0:5)){

#subset of each dataset, #0 has native missing data, 1-5 are imputed datasets
mydata_subsub<-subset(mydata_sub, .imp==j)

###Multi-level mixed effects models for Egger Tests
test.egger = rma.mv(yi,vi, mod = vi, random = ~ 1 | Author/StudyID, data = mydata_subsub)

###Egger test for bias
print(TRT)
print(j) #0 has native missing data, 1-5 are imputed datasets
print(test.egger)
}

} #End For Loop

#Multilevel full analysis,

#Loop through non-imputed and imputed data for full dataset with all treatment categories
for (k in c(0:5)){

#subset of each dataset
mydata_subfull<-subset(mydata, .imp==k)
test.egger = rma.mv(yi,vi, mod = vi, random = ~ 1 | Author/StudyID, data = mydata_subfull)

###Egger test for bias
print("Full Model")
print(k) #0 has native missing data, 1-5 are imputed datasets
print(test.egger)
} # End for loop

# close the output file
sink()
# unload the libraries
detach("package:gdata")
detach("package:metafor")
# change back to the original directory
setwd(initial.dir)

*****

[1] "Placebo"
[1] 0

```



Multivariate Meta-Analysis Model (k = 78; method: REML)

Variance Components:

|           | estim  | sqrt   | nlvls | fixed | factor         |
|-----------|--------|--------|-------|-------|----------------|
| sigma^2.1 | 0.8280 | 0.9100 | 42    | no    | Author         |
| sigma^2.2 | 0.3591 | 0.5992 | 65    | no    | Author/StudyID |

Test for Residual Heterogeneity:

QE(df = 76) = 228.3277, p-val < .0001

Test of Moderators (coefficient(s) 2):

QM(df = 1) = 16.6029, p-val < .0001

Model Results:

|         | estimate | se     | zval    | pval   | ci.lb   | ci.ub   |     |
|---------|----------|--------|---------|--------|---------|---------|-----|
| intrcpt | -0.6630  | 0.3154 | -2.1024 | 0.0355 | -1.2811 | -0.0449 | *   |
| mods    | 1.3385   | 0.3285 | 4.0747  | <.0001 | 0.6946  | 1.9823  | *** |

---

Signif. codes: 0 '\*\*\*' 0.001 '\*\*' 0.01 '\*' 0.05 '.' 0.1 ' ' 1

[1] "Placebo"

[1] 1

Multivariate Meta-Analysis Model (k = 96; method: REML)

Variance Components:

|           | estim  | sqrt   | nlvls | fixed | factor         |
|-----------|--------|--------|-------|-------|----------------|
| sigma^2.1 | 1.1237 | 1.0600 | 51    | no    | Author         |
| sigma^2.2 | 0.2659 | 0.5157 | 80    | no    | Author/StudyID |

Test for Residual Heterogeneity:

QE(df = 94) = 290.0080, p-val < .0001

Test of Moderators (coefficient(s) 2):

QM(df = 1) = 21.1484, p-val < .0001

Model Results:

|         | estimate | se     | zval    | pval   | ci.lb   | ci.ub  |     |
|---------|----------|--------|---------|--------|---------|--------|-----|
| intrcpt | -0.4157  | 0.3041 | -1.3671 | 0.1716 | -1.0117 | 0.1803 |     |
| mods    | 1.3361   | 0.2905 | 4.5987  | <.0001 | 0.7666  | 1.9055 | *** |

---

Signif. codes: 0 '\*\*\*' 0.001 '\*\*' 0.01 '\*' 0.05 '.' 0.1 ' ' 1

[1] "Placebo"

[1] 2

Multivariate Meta-Analysis Model (k = 96; method: REML)

Variance Components:

|           | estim  | sqrt   | nlvls | fixed | factor         |
|-----------|--------|--------|-------|-------|----------------|
| sigma^2.1 | 0.8309 | 0.9115 | 51    | no    | Author         |
| sigma^2.2 | 0.8295 | 0.9107 | 80    | no    | Author/StudyID |

Test for Residual Heterogeneity:

QE(df = 94) = 315.0832, p-val < .0001

Test of Moderators (coefficient(s) 2):

QM(df = 1) = 17.5368, p-val < .0001

Model Results:

|         | estimate | se     | zval    | pval   | ci.lb   | ci.ub   |     |
|---------|----------|--------|---------|--------|---------|---------|-----|
| intrcpt | -0.7618  | 0.3209 | -2.3737 | 0.0176 | -1.3908 | -0.1328 | *   |
| mods    | 1.3485   | 0.3220 | 4.1877  | <.0001 | 0.7174  | 1.9797  | *** |

---

Signif. codes: 0 '\*\*\*' 0.001 '\*\*' 0.01 '\*' 0.05 '.' 0.1 ' ' 1

[1] "Placebo"

[1] 3

Multivariate Meta-Analysis Model (k = 96; method: REML)

Variance Components:

|           | estim  | sqrt   | nlvls | fixed | factor         |
|-----------|--------|--------|-------|-------|----------------|
| sigma^2.1 | 1.2684 | 1.1262 | 51    | no    | Author         |
| sigma^2.2 | 0.5300 | 0.7280 | 80    | no    | Author/StudyID |

Test for Residual Heterogeneity:

QE(df = 94) = 343.3167, p-val < .0001

Test of Moderators (coefficient(s) 2):

QM(df = 1) = 12.0580, p-val = 0.0005

Model Results:

|         | estimate | se     | zval    | pval   | ci.lb   | ci.ub   |     |
|---------|----------|--------|---------|--------|---------|---------|-----|
| intrcpt | -0.8671  | 0.3154 | -2.7496 | 0.0060 | -1.4852 | -0.2490 | **  |
| mods    | 1.1144   | 0.3209 | 3.4725  | 0.0005 | 0.4854  | 1.7434  | *** |

---

Signif. codes: 0 '\*\*\*' 0.001 '\*\*' 0.01 '\*' 0.05 '.' 0.1 ' ' 1

[1] "Placebo"

[1] 4

Multivariate Meta-Analysis Model (k = 96; method: REML)

Variance Components:

|           | estim  | sqrt   | nlvls | fixed | factor         |
|-----------|--------|--------|-------|-------|----------------|
| sigma^2.1 | 0.9780 | 0.9889 | 51    | no    | Author         |
| sigma^2.2 | 0.3440 | 0.5865 | 80    | no    | Author/StudyID |

Test for Residual Heterogeneity:

QE(df = 94) = 283.9711, p-val < .0001

Test of Moderators (coefficient(s) 2):

QM(df = 1) = 24.4018, p-val < .0001

Model Results:

|         | estimate | se     | zval    | pval   | ci.lb   | ci.ub  |     |
|---------|----------|--------|---------|--------|---------|--------|-----|
| intrcpt | -0.5411  | 0.3143 | -1.7214 | 0.0852 | -1.1571 | 0.0750 | .   |
| mods    | 1.5006   | 0.3038 | 4.9398  | <.0001 | 0.9052  | 2.0960 | *** |

---

Signif. codes: 0 '\*\*\*' 0.001 '\*\*' 0.01 '\*' 0.05 '.' 0.1 ' ' 1

[1] "Placebo"

[1] 5

Multivariate Meta-Analysis Model (k = 96; method: REML)

Variance Components:

|           | estim  | sqrt   | nlvls | fixed | factor         |
|-----------|--------|--------|-------|-------|----------------|
| sigma^2.1 | 0.7510 | 0.8666 | 51    | no    | Author         |
| sigma^2.2 | 0.5964 | 0.7723 | 80    | no    | Author/StudyID |

Test for Residual Heterogeneity:

QE(df = 94) = 280.9826, p-val < .0001

Test of Moderators (coefficient(s) 2):

QM(df = 1) = 20.2187, p-val < .0001

Model Results:

|         | estimate | se     | zval    | pval   | ci.lb   | ci.ub  |     |
|---------|----------|--------|---------|--------|---------|--------|-----|
| intrcpt | -0.5832  | 0.3069 | -1.9001 | 0.0574 | -1.1847 | 0.0184 | .   |
| mods    | 1.3662   | 0.3038 | 4.4965  | <.0001 | 0.7707  | 1.9618 | *** |

---

Signif. codes: 0 '\*\*\*' 0.001 '\*\*' 0.01 '\*' 0.05 '.' 0.1 ' ' 1

[1] "Psychotherapy"

[1] 0

Multivariate Meta-Analysis Model (k = 259; method: REML)

Variance Components:

|           | estim  | sqrt   | nlvls | fixed | factor         |
|-----------|--------|--------|-------|-------|----------------|
| sigma^2.1 | 1.2076 | 1.0989 | 65    | no    | Author         |
| sigma^2.2 | 0.5730 | 0.7570 | 98    | no    | Author/StudyID |

Test for Residual Heterogeneity:

QE(df = 257) = 889.8962, p-val < .0001

Test of Moderators (coefficient(s) 2):

QM(df = 1) = 1.6025, p-val = 0.2055

Model Results:

|         | estimate | se     | zval   | pval   | ci.lb   | ci.ub  |   |
|---------|----------|--------|--------|--------|---------|--------|---|
| intrcpt | 0.5313   | 0.2373 | 2.2389 | 0.0252 | 0.0662  | 0.9964 | * |
| mods    | 0.2844   | 0.2246 | 1.2659 | 0.2055 | -0.1559 | 0.7247 |   |

---

Signif. codes: 0 '\*\*\*' 0.001 '\*\*' 0.01 '\*' 0.05 '.' 0.1 ' ' 1

[1] "Psychotherapy"

[1] 1

Multivariate Meta-Analysis Model (k = 330; method: REML)

Variance Components:

|           | estim  | sqrt   | nlvls | fixed | factor         |
|-----------|--------|--------|-------|-------|----------------|
| sigma^2.1 | 1.1582 | 1.0762 | 82    | no    | Author         |
| sigma^2.2 | 0.7329 | 0.8561 | 131   | no    | Author/StudyID |

Test for Residual Heterogeneity:

QE(df = 328) = 1145.1182, p-val < .0001

Test of Moderators (coefficient(s) 2):

QM(df = 1) = 22.4099, p-val < .0001

Model Results:

|         | estimate | se     | zval   | pval   | ci.lb   | ci.ub  |     |
|---------|----------|--------|--------|--------|---------|--------|-----|
| intrcpt | 0.4171   | 0.2208 | 1.8886 | 0.0589 | -0.0158 | 0.8499 | .   |
| mods    | 0.9017   | 0.1905 | 4.7339 | <.0001 | 0.5284  | 1.2750 | *** |

---

Signif. codes: 0 '\*\*\*' 0.001 '\*\*' 0.01 '\*' 0.05 '.' 0.1 ' ' 1

[1] "Psychotherapy"

[1] 2

Multivariate Meta-Analysis Model (k = 330; method: REML)

Variance Components:

|           | estim  | sqrt   | nlvls | fixed | factor         |
|-----------|--------|--------|-------|-------|----------------|
| sigma^2.1 | 0.9096 | 0.9537 | 82    | no    | Author         |
| sigma^2.2 | 0.9705 | 0.9851 | 131   | no    | Author/StudyID |

Test for Residual Heterogeneity:

QE(df = 328) = 1389.6902, p-val < .0001

Test of Moderators (coefficient(s) 2):

QM(df = 1) = 18.5778, p-val < .0001

Model Results:

|         | estimate | se     | zval    | pval   | ci.lb   | ci.ub      |
|---------|----------|--------|---------|--------|---------|------------|
| intrcpt | -0.2354  | 0.2016 | -1.1675 | 0.2430 | -0.6306 | 0.1598     |
| mods    | 0.8408   | 0.1951 | 4.3102  | <.0001 | 0.4584  | 1.2231 *** |

---

Signif. codes: 0 '\*\*\*' 0.001 '\*\*' 0.01 '\*' 0.05 '.' 0.1 ' ' 1

[1] "Psychotherapy"

[1] 3

Multivariate Meta-Analysis Model (k = 330; method: REML)

Variance Components:

|           | estim  | sqrt   | nlvls | fixed | factor         |
|-----------|--------|--------|-------|-------|----------------|
| sigma^2.1 | 1.1551 | 1.0748 | 82    | no    | Author         |
| sigma^2.2 | 1.1943 | 1.0929 | 131   | no    | Author/StudyID |

Test for Residual Heterogeneity:

QE(df = 328) = 1432.3839, p-val < .0001

Test of Moderators (coefficient(s) 2):

QM(df = 1) = 0.7444, p-val = 0.3883

Model Results:

|         | estimate | se     | zval   | pval   | ci.lb   | ci.ub  |
|---------|----------|--------|--------|--------|---------|--------|
| intrcpt | 0.0599   | 0.2181 | 0.2748 | 0.7835 | -0.3676 | 0.4874 |
| mods    | 0.1821   | 0.2110 | 0.8628 | 0.3883 | -0.2316 | 0.5957 |

---

Signif. codes: 0 '\*\*\*' 0.001 '\*\*' 0.01 '\*' 0.05 '.' 0.1 ' ' 1

[1] "Psychotherapy"

[1] 4

Multivariate Meta-Analysis Model (k = 330; method: REML)

Variance Components:

|  | estim | sqrt | nlvls | fixed | factor |
|--|-------|------|-------|-------|--------|
|--|-------|------|-------|-------|--------|

|           |        |        |     |    |                |
|-----------|--------|--------|-----|----|----------------|
| sigma^2.1 | 1.2841 | 1.1332 | 82  | no | Author         |
| sigma^2.2 | 0.6489 | 0.8056 | 131 | no | Author/StudyID |

Test for Residual Heterogeneity:  
 QE(df = 328) = 1109.1718, p-val < .0001

Test of Moderators (coefficient(s) 2):  
 QM(df = 1) = 14.1316, p-val = 0.0002

Model Results:

|         | estimate | se     | zval   | pval   | ci.lb  | ci.ub  |     |
|---------|----------|--------|--------|--------|--------|--------|-----|
| intrcpt | 0.6045   | 0.2303 | 2.6252 | 0.0087 | 0.1532 | 1.0558 | **  |
| mods    | 0.7468   | 0.1987 | 3.7592 | 0.0002 | 0.3574 | 1.1361 | *** |

---  
 Signif. codes: 0 '\*\*\*' 0.001 '\*\*' 0.01 '\*' 0.05 '.' 0.1 ' ' 1

[1] "Psychotherapy"  
 [1] 5

Multivariate Meta-Analysis Model (k = 330; method: REML)

Variance Components:

|           | estim  | sqrt   | nlvls | fixed | factor         |
|-----------|--------|--------|-------|-------|----------------|
| sigma^2.1 | 0.6891 | 0.8301 | 82    | no    | Author         |
| sigma^2.2 | 1.2129 | 1.1013 | 131   | no    | Author/StudyID |

Test for Residual Heterogeneity:  
 QE(df = 328) = 1108.9843, p-val < .0001

Test of Moderators (coefficient(s) 2):  
 QM(df = 1) = 6.8123, p-val = 0.0091

Model Results:

|         | estimate | se     | zval   | pval   | ci.lb   | ci.ub  |    |
|---------|----------|--------|--------|--------|---------|--------|----|
| intrcpt | 0.4230   | 0.2168 | 1.9508 | 0.0511 | -0.0020 | 0.8480 | .  |
| mods    | 0.5309   | 0.2034 | 2.6100 | 0.0091 | 0.1322  | 0.9296 | ** |

---  
 Signif. codes: 0 '\*\*\*' 0.001 '\*\*' 0.01 '\*' 0.05 '.' 0.1 ' ' 1

[1] "ContingencyManagement"  
 [1] 0

Multivariate Meta-Analysis Model (k = 69; method: REML)

Variance Components:

|           | estim  | sqrt   | nlvls | fixed | factor |
|-----------|--------|--------|-------|-------|--------|
| sigma^2.1 | 0.4707 | 0.6861 | 27    | no    | Author |

sigma^2.2 0.3542 0.5951 38 no Author/StudyID

Test for Residual Heterogeneity:

QE(df = 67) = 207.4040, p-val < .0001

Test of Moderators (coefficient(s) 2):

QM(df = 1) = 8.0721, p-val = 0.0045

Model Results:

|         | estimate | se     | zval   | pval   | ci.lb   | ci.ub  |    |
|---------|----------|--------|--------|--------|---------|--------|----|
| intrcpt | 0.5007   | 0.3091 | 1.6201 | 0.1052 | -0.1051 | 1.1065 |    |
| mods    | 1.1203   | 0.3943 | 2.8411 | 0.0045 | 0.3475  | 1.8932 | ** |

---

Signif. codes: 0 '\*\*\*' 0.001 '\*\*' 0.01 '\*' 0.05 '.' 0.1 ' ' 1

[1] "ContingencyManagement"

[1] 1

Multivariate Meta-Analysis Model (k = 88; method: REML)

Variance Components:

|           | estim  | sqrt   | nlvls | fixed | factor         |
|-----------|--------|--------|-------|-------|----------------|
| sigma^2.1 | 0.1424 | 0.3773 | 33    | no    | Author         |
| sigma^2.2 | 0.7093 | 0.8422 | 50    | no    | Author/StudyID |

Test for Residual Heterogeneity:

QE(df = 86) = 256.0774, p-val < .0001

Test of Moderators (coefficient(s) 2):

QM(df = 1) = 29.9044, p-val < .0001

Model Results:

|         | estimate | se     | zval   | pval   | ci.lb   | ci.ub  |     |
|---------|----------|--------|--------|--------|---------|--------|-----|
| intrcpt | 0.2374   | 0.2748 | 0.8639 | 0.3877 | -0.3012 | 0.7759 |     |
| mods    | 1.7693   | 0.3236 | 5.4685 | <.0001 | 1.1352  | 2.4035 | *** |

---

Signif. codes: 0 '\*\*\*' 0.001 '\*\*' 0.01 '\*' 0.05 '.' 0.1 ' ' 1

[1] "ContingencyManagement"

[1] 2

Multivariate Meta-Analysis Model (k = 88; method: REML)

Variance Components:

|           | estim  | sqrt   | nlvls | fixed | factor         |
|-----------|--------|--------|-------|-------|----------------|
| sigma^2.1 | 0.2943 | 0.5425 | 33    | no    | Author         |
| sigma^2.2 | 0.7926 | 0.8903 | 50    | no    | Author/StudyID |

Test for Residual Heterogeneity:  
QE(df = 86) = 360.1599, p-val < .0001

Test of Moderators (coefficient(s) 2):  
QM(df = 1) = 14.4169, p-val = 0.0001

Model Results:

|         | estimate | se     | zval    | pval   | ci.lb   | ci.ub  |     |
|---------|----------|--------|---------|--------|---------|--------|-----|
| intrcpt | -0.0172  | 0.2875 | -0.0597 | 0.9524 | -0.5807 | 0.5464 |     |
| mods    | 1.4391   | 0.3790 | 3.7970  | 0.0001 | 0.6962  | 2.1819 | *** |

---  
Signif. codes: 0 '\*\*\*' 0.001 '\*\*' 0.01 '\*' 0.05 '.' 0.1 ' ' 1

[1] "ContingencyManagement"  
[1] 3

Multivariate Meta-Analysis Model (k = 88; method: REML)

Variance Components:

|           | estim  | sqrt   | nlvls | fixed | factor         |
|-----------|--------|--------|-------|-------|----------------|
| sigma^2.1 | 0.3173 | 0.5633 | 33    | no    | Author         |
| sigma^2.2 | 0.9476 | 0.9734 | 50    | no    | Author/StudyID |

Test for Residual Heterogeneity:  
QE(df = 86) = 374.3820, p-val < .0001

Test of Moderators (coefficient(s) 2):  
QM(df = 1) = 10.8216, p-val = 0.0010

Model Results:

|         | estimate | se     | zval    | pval   | ci.lb   | ci.ub  |    |
|---------|----------|--------|---------|--------|---------|--------|----|
| intrcpt | -0.0411  | 0.2982 | -0.1379 | 0.8903 | -0.6256 | 0.5433 |    |
| mods    | 1.3105   | 0.3984 | 3.2896  | 0.0010 | 0.5297  | 2.0913 | ** |

---  
Signif. codes: 0 '\*\*\*' 0.001 '\*\*' 0.01 '\*' 0.05 '.' 0.1 ' ' 1

[1] "ContingencyManagement"  
[1] 4

Multivariate Meta-Analysis Model (k = 88; method: REML)

Variance Components:

|           | estim  | sqrt   | nlvls | fixed | factor         |
|-----------|--------|--------|-------|-------|----------------|
| sigma^2.1 | 0.2403 | 0.4902 | 33    | no    | Author         |
| sigma^2.2 | 0.4994 | 0.7067 | 50    | no    | Author/StudyID |



Test for Residual Heterogeneity:  
QE(df = 86) = 231.2155, p-val < .0001

Test of Moderators (coefficient(s) 2):  
QM(df = 1) = 32.2073, p-val < .0001

Model Results:

|         | estimate | se     | zval   | pval   | ci.lb   | ci.ub  |     |
|---------|----------|--------|--------|--------|---------|--------|-----|
| intrcpt | 0.2693   | 0.2769 | 0.9726 | 0.3307 | -0.2734 | 0.8119 |     |
| mods    | 1.7952   | 0.3163 | 5.6751 | <.0001 | 1.1752  | 2.4152 | *** |

---  
Signif. codes: 0 '\*\*\*' 0.001 '\*\*' 0.01 '\*' 0.05 '.' 0.1 ' ' 1

[1] "ContingencyManagement"  
[1] 5

Multivariate Meta-Analysis Model (k = 88; method: REML)

Variance Components:

|           | estim  | sqrt   | nlvls | fixed | factor         |
|-----------|--------|--------|-------|-------|----------------|
| sigma^2.1 | 0.1260 | 0.3549 | 33    | no    | Author         |
| sigma^2.2 | 0.6342 | 0.7964 | 50    | no    | Author/StudyID |

Test for Residual Heterogeneity:  
QE(df = 86) = 239.9328, p-val < .0001

Test of Moderators (coefficient(s) 2):  
QM(df = 1) = 26.9386, p-val < .0001

Model Results:

|         | estimate | se     | zval   | pval   | ci.lb   | ci.ub  |     |
|---------|----------|--------|--------|--------|---------|--------|-----|
| intrcpt | 0.1012   | 0.2610 | 0.3879 | 0.6981 | -0.4102 | 0.6127 |     |
| mods    | 1.6962   | 0.3268 | 5.1902 | <.0001 | 1.0557  | 2.3368 | *** |

---  
Signif. codes: 0 '\*\*\*' 0.001 '\*\*' 0.01 '\*' 0.05 '.' 0.1 ' ' 1

[1] "Other"  
[1] 0

Multivariate Meta-Analysis Model (k = 21; method: REML)

Variance Components:

|           | estim  | sqrt   | nlvls | fixed | factor         |
|-----------|--------|--------|-------|-------|----------------|
| sigma^2.1 | 0.0000 | 0.0001 | 11    | no    | Author         |
| sigma^2.2 | 1.0571 | 1.0282 | 12    | no    | Author/StudyID |

Test for Residual Heterogeneity:

QE(df = 19) = 52.1176, p-val < .0001

Test of Moderators (coefficient(s) 2):

QM(df = 1) = 2.5727, p-val = 0.1087

Model Results:

|         | estimate | se     | zval   | pval   | ci.lb   | ci.ub  |
|---------|----------|--------|--------|--------|---------|--------|
| intrcpt | 0.7616   | 0.5430 | 1.4026 | 0.1607 | -0.3027 | 1.8259 |
| mods    | 0.8248   | 0.5142 | 1.6040 | 0.1087 | -0.1831 | 1.8326 |

---

Signif. codes: 0 '\*\*\*' 0.001 '\*\*' 0.01 '\*' 0.05 '.' 0.1 ' ' 1

[1] "Other"

[1] 1

Multivariate Meta-Analysis Model (k = 26; method: REML)

Variance Components:

|           | estim  | sqrt   | nlvls | fixed | factor         |
|-----------|--------|--------|-------|-------|----------------|
| sigma^2.1 | 0.0000 | 0.0001 | 14    | no    | Author         |
| sigma^2.2 | 0.9366 | 0.9678 | 15    | no    | Author/StudyID |

Test for Residual Heterogeneity:

QE(df = 24) = 56.2187, p-val = 0.0002

Test of Moderators (coefficient(s) 2):

QM(df = 1) = 4.1038, p-val = 0.0428

Model Results:

|         | estimate | se     | zval   | pval   | ci.lb   | ci.ub    |
|---------|----------|--------|--------|--------|---------|----------|
| intrcpt | 0.8301   | 0.5165 | 1.6072 | 0.1080 | -0.1822 | 1.8424   |
| mods    | 0.9901   | 0.4888 | 2.0258 | 0.0428 | 0.0322  | 1.9480 * |

---

Signif. codes: 0 '\*\*\*' 0.001 '\*\*' 0.01 '\*' 0.05 '.' 0.1 ' ' 1

[1] "Other"

[1] 2

Multivariate Meta-Analysis Model (k = 26; method: REML)

Variance Components:

|           | estim  | sqrt   | nlvls | fixed | factor         |
|-----------|--------|--------|-------|-------|----------------|
| sigma^2.1 | 0.0000 | 0.0003 | 14    | no    | Author         |
| sigma^2.2 | 2.7994 | 1.6731 | 15    | no    | Author/StudyID |

Test for Residual Heterogeneity:

QE(df = 24) = 130.9743, p-val < .0001

Test of Moderators (coefficient(s) 2):

QM(df = 1) = 4.8216, p-val = 0.0281

Model Results:

|         | estimate | se     | zval    | pval   | ci.lb   | ci.ub    |
|---------|----------|--------|---------|--------|---------|----------|
| intrcpt | -0.2932  | 0.6478 | -0.4525 | 0.6509 | -1.5628 | 0.9765   |
| mods    | 1.3142   | 0.5985 | 2.1958  | 0.0281 | 0.1412  | 2.4872 * |

---

Signif. codes: 0 '\*\*\*' 0.001 '\*\*' 0.01 '\*' 0.05 '.' 0.1 ' ' 1

[1] "Other"

[1] 3

Multivariate Meta-Analysis Model (k = 26; method: REML)

Variance Components:

|           | estim  | sqrt   | nlvls | fixed | factor         |
|-----------|--------|--------|-------|-------|----------------|
| sigma^2.1 | 0.0000 | 0.0004 | 14    | no    | Author         |
| sigma^2.2 | 2.8013 | 1.6737 | 15    | no    | Author/StudyID |

Test for Residual Heterogeneity:

QE(df = 24) = 130.7994, p-val < .0001

Test of Moderators (coefficient(s) 2):

QM(df = 1) = 4.8297, p-val = 0.0280

Model Results:

|         | estimate | se     | zval    | pval   | ci.lb   | ci.ub    |
|---------|----------|--------|---------|--------|---------|----------|
| intrcpt | -0.2944  | 0.6479 | -0.4544 | 0.6495 | -1.5643 | 0.9755   |
| mods    | 1.3154   | 0.5985 | 2.1977  | 0.0280 | 0.1423  | 2.4885 * |

---

Signif. codes: 0 '\*\*\*' 0.001 '\*\*' 0.01 '\*' 0.05 '.' 0.1 ' ' 1

[1] "Other"

[1] 4

Multivariate Meta-Analysis Model (k = 26; method: REML)

Variance Components:

|           | estim  | sqrt   | nlvls | fixed | factor         |
|-----------|--------|--------|-------|-------|----------------|
| sigma^2.1 | 0.0000 | 0.0001 | 14    | no    | Author         |
| sigma^2.2 | 0.9366 | 0.9678 | 15    | no    | Author/StudyID |

Test for Residual Heterogeneity:

QE(df = 24) = 56.2187, p-val = 0.0002

Test of Moderators (coefficient(s) 2):  
QM(df = 1) = 4.1038, p-val = 0.0428

Model Results:

|         | estimate | se     | zval   | pval   | ci.lb   | ci.ub  |   |
|---------|----------|--------|--------|--------|---------|--------|---|
| intrcpt | 0.8301   | 0.5165 | 1.6072 | 0.1080 | -0.1822 | 1.8424 |   |
| mods    | 0.9901   | 0.4888 | 2.0258 | 0.0428 | 0.0322  | 1.9480 | * |

---

Signif. codes: 0 '\*\*\*' 0.001 '\*\*' 0.01 '\*' 0.05 '.' 0.1 ' ' 1

[1] "Other"  
[1] 5

Multivariate Meta-Analysis Model (k = 26; method: REML)

Variance Components:

|           | estim  | sqrt   | nlvls | fixed | factor         |
|-----------|--------|--------|-------|-------|----------------|
| sigma^2.1 | 0.0000 | 0.0002 | 14    | no    | Author         |
| sigma^2.2 | 2.2431 | 1.4977 | 15    | no    | Author/StudyID |

Test for Residual Heterogeneity:  
QE(df = 24) = 111.1455, p-val < .0001

Test of Moderators (coefficient(s) 2):  
QM(df = 1) = 4.4686, p-val = 0.0345

Model Results:

|         | estimate | se     | zval   | pval   | ci.lb   | ci.ub  |   |
|---------|----------|--------|--------|--------|---------|--------|---|
| intrcpt | 0.0831   | 0.6231 | 0.1333 | 0.8939 | -1.1383 | 1.3044 |   |
| mods    | 1.2124   | 0.5735 | 2.1139 | 0.0345 | 0.0883  | 2.3365 | * |

---

Signif. codes: 0 '\*\*\*' 0.001 '\*\*' 0.01 '\*' 0.05 '.' 0.1 ' ' 1

[1] "Opioid"  
[1] 0

Multivariate Meta-Analysis Model (k = 142; method: REML)

Variance Components:

|           | estim  | sqrt   | nlvls | fixed | factor         |
|-----------|--------|--------|-------|-------|----------------|
| sigma^2.1 | 0.5448 | 0.7381 | 32    | no    | Author         |
| sigma^2.2 | 0.1551 | 0.3939 | 49    | no    | Author/StudyID |

Test for Residual Heterogeneity:  
QE(df = 140) = 257.9966, p-val < .0001

Test of Moderators (coefficient(s) 2):

QM(df = 1) = 12.5663, p-val = 0.0004

Model Results:

|         | estimate | se     | zval   | pval   | ci.lb   | ci.ub  |     |
|---------|----------|--------|--------|--------|---------|--------|-----|
| intrcpt | 0.5269   | 0.2689 | 1.9599 | 0.0500 | -0.0000 | 1.0539 | .   |
| mods    | 1.0012   | 0.2824 | 3.5449 | 0.0004 | 0.4476  | 1.5547 | *** |

---

Signif. codes: 0 '\*\*\*' 0.001 '\*\*' 0.01 '\*' 0.05 '.' 0.1 ' ' 1

[1] "Opioid"

[1] 1

Multivariate Meta-Analysis Model (k = 159; method: REML)

Variance Components:

|           | estim  | sqrt   | nlvls | fixed | factor         |
|-----------|--------|--------|-------|-------|----------------|
| sigma^2.1 | 0.6177 | 0.7859 | 34    | no    | Author         |
| sigma^2.2 | 0.1197 | 0.3460 | 55    | no    | Author/StudyID |

Test for Residual Heterogeneity:

QE(df = 157) = 283.7641, p-val < .0001

Test of Moderators (coefficient(s) 2):

QM(df = 1) = 16.2211, p-val < .0001

Model Results:

|         | estimate | se     | zval   | pval   | ci.lb  | ci.ub  |     |
|---------|----------|--------|--------|--------|--------|--------|-----|
| intrcpt | 0.5507   | 0.2626 | 2.0967 | 0.0360 | 0.0359 | 1.0655 | *   |
| mods    | 1.0537   | 0.2616 | 4.0275 | <.0001 | 0.5409 | 1.5665 | *** |

---

Signif. codes: 0 '\*\*\*' 0.001 '\*\*' 0.01 '\*' 0.05 '.' 0.1 ' ' 1

[1] "Opioid"

[1] 2

Multivariate Meta-Analysis Model (k = 159; method: REML)

Variance Components:

|           | estim  | sqrt   | nlvls | fixed | factor         |
|-----------|--------|--------|-------|-------|----------------|
| sigma^2.1 | 1.4455 | 1.2023 | 34    | no    | Author         |
| sigma^2.2 | 0.3765 | 0.6136 | 55    | no    | Author/StudyID |

Test for Residual Heterogeneity:

QE(df = 157) = 529.1676, p-val < .0001

Test of Moderators (coefficient(s) 2):

QM(df = 1) = 4.4702, p-val = 0.0345

Model Results:

|         | estimate | se     | zval   | pval   | ci.lb   | ci.ub  |   |
|---------|----------|--------|--------|--------|---------|--------|---|
| intrcpt | 0.4851   | 0.3507 | 1.3833 | 0.1666 | -0.2022 | 1.1724 |   |
| mods    | 0.7043   | 0.3331 | 2.1143 | 0.0345 | 0.0514  | 1.3572 | * |

---

Signif. codes: 0 '\*\*\*' 0.001 '\*\*' 0.01 '\*' 0.05 '.' 0.1 ' ' 1

[1] "Opioid"

[1] 3

Multivariate Meta-Analysis Model (k = 159; method: REML)

Variance Components:

|           | estim  | sqrt   | nlvls | fixed | factor         |
|-----------|--------|--------|-------|-------|----------------|
| sigma^2.1 | 1.4872 | 1.2195 | 34    | no    | Author         |
| sigma^2.2 | 0.3012 | 0.5488 | 55    | no    | Author/StudyID |

Test for Residual Heterogeneity:

QE(df = 157) = 523.1105, p-val < .0001

Test of Moderators (coefficient(s) 2):

QM(df = 1) = 4.5844, p-val = 0.0323

Model Results:

|         | estimate | se     | zval   | pval   | ci.lb   | ci.ub  |   |
|---------|----------|--------|--------|--------|---------|--------|---|
| intrcpt | 0.5070   | 0.3427 | 1.4792 | 0.1391 | -0.1648 | 1.1787 |   |
| mods    | 0.6859   | 0.3203 | 2.1411 | 0.0323 | 0.0580  | 1.3137 | * |

---

Signif. codes: 0 '\*\*\*' 0.001 '\*\*' 0.01 '\*' 0.05 '.' 0.1 ' ' 1

[1] "Opioid"

[1] 4

Multivariate Meta-Analysis Model (k = 159; method: REML)

Variance Components:

|           | estim  | sqrt   | nlvls | fixed | factor         |
|-----------|--------|--------|-------|-------|----------------|
| sigma^2.1 | 0.6361 | 0.7976 | 34    | no    | Author         |
| sigma^2.2 | 0.1204 | 0.3470 | 55    | no    | Author/StudyID |

Test for Residual Heterogeneity:

QE(df = 157) = 281.1605, p-val < .0001

Test of Moderators (coefficient(s) 2):

QM(df = 1) = 15.2348, p-val < .0001

Model Results:

|         | estimate | se     | zval   | pval   | ci.lb  | ci.ub  |     |
|---------|----------|--------|--------|--------|--------|--------|-----|
| intrcpt | 0.5584   | 0.2711 | 2.0602 | 0.0394 | 0.0272 | 1.0897 | *   |
| mods    | 1.0515   | 0.2694 | 3.9032 | <.0001 | 0.5235 | 1.5796 | *** |

---

Signif. codes: 0 '\*\*\*' 0.001 '\*\*' 0.01 '\*' 0.05 '.' 0.1 ' ' 1

[1] "Opioid"

[1] 5

Multivariate Meta-Analysis Model (k = 159; method: REML)

Variance Components:

|           | estim  | sqrt   | nlvls | fixed | factor         |
|-----------|--------|--------|-------|-------|----------------|
| sigma^2.1 | 0.5072 | 0.7122 | 34    | no    | Author         |
| sigma^2.2 | 0.7522 | 0.8673 | 55    | no    | Author/StudyID |

Test for Residual Heterogeneity:

QE(df = 157) = 375.3041, p-val < .0001

Test of Moderators (coefficient(s) 2):

QM(df = 1) = 3.7491, p-val = 0.0528

Model Results:

|         | estimate | se     | zval   | pval   | ci.lb   | ci.ub  |   |
|---------|----------|--------|--------|--------|---------|--------|---|
| intrcpt | 0.7365   | 0.3189 | 2.3099 | 0.0209 | 0.1116  | 1.3615 | * |
| mods    | 0.6184   | 0.3194 | 1.9363 | 0.0528 | -0.0076 | 1.2444 | . |

---

Signif. codes: 0 '\*\*\*' 0.001 '\*\*' 0.01 '\*' 0.05 '.' 0.1 ' ' 1

[1] "MiscMeds"

[1] 0

Multivariate Meta-Analysis Model (k = 38; method: REML)

Variance Components:

|           | estim  | sqrt   | nlvls | fixed | factor         |
|-----------|--------|--------|-------|-------|----------------|
| sigma^2.1 | 0.8811 | 0.9387 | 21    | no    | Author         |
| sigma^2.2 | 0.1883 | 0.4339 | 26    | no    | Author/StudyID |

Test for Residual Heterogeneity:

QE(df = 36) = 80.7060, p-val < .0001

Test of Moderators (coefficient(s) 2):

QM(df = 1) = 2.1600, p-val = 0.1416

Model Results:

|         | estimate | se     | zval   | pval   | ci.lb   | ci.ub  |
|---------|----------|--------|--------|--------|---------|--------|
| intrcpt | 0.0951   | 0.4744 | 0.2004 | 0.8412 | -0.8347 | 1.0249 |
| mods    | 0.6615   | 0.4501 | 1.4697 | 0.1416 | -0.2207 | 1.5437 |

---

Signif. codes: 0 '\*\*\*' 0.001 '\*\*' 0.01 '\*' 0.05 '.' 0.1 ' ' 1

[1] "MiscMeds"

[1] 1

Multivariate Meta-Analysis Model (k = 54; method: REML)

Variance Components:

|           | estim  | sqrt   | nlvls | fixed | factor         |
|-----------|--------|--------|-------|-------|----------------|
| sigma^2.1 | 1.0832 | 1.0408 | 27    | no    | Author         |
| sigma^2.2 | 0.0000 | 0.0001 | 37    | no    | Author/StudyID |

Test for Residual Heterogeneity:

QE(df = 52) = 105.2566, p-val < .0001

Test of Moderators (coefficient(s) 2):

QM(df = 1) = 5.2179, p-val = 0.0224

Model Results:

|         | estimate | se     | zval   | pval   | ci.lb   | ci.ub    |
|---------|----------|--------|--------|--------|---------|----------|
| intrcpt | 0.2081   | 0.4311 | 0.4828 | 0.6293 | -0.6368 | 1.0530   |
| mods    | 0.8411   | 0.3682 | 2.2843 | 0.0224 | 0.1194  | 1.5627 * |

---

Signif. codes: 0 '\*\*\*' 0.001 '\*\*' 0.01 '\*' 0.05 '.' 0.1 ' ' 1

[1] "MiscMeds"

[1] 2

Multivariate Meta-Analysis Model (k = 54; method: REML)

Variance Components:

|           | estim  | sqrt   | nlvls | fixed | factor         |
|-----------|--------|--------|-------|-------|----------------|
| sigma^2.1 | 1.1464 | 1.0707 | 27    | no    | Author         |
| sigma^2.2 | 1.4405 | 1.2002 | 37    | no    | Author/StudyID |

Test for Residual Heterogeneity:

QE(df = 52) = 217.4944, p-val < .0001

Test of Moderators (coefficient(s) 2):

QM(df = 1) = 1.6396, p-val = 0.2004

Model Results:



|         | estimate | se     | zval    | pval   | ci.lb   | ci.ub  |
|---------|----------|--------|---------|--------|---------|--------|
| intrcpt | -0.2861  | 0.5820 | -0.4915 | 0.6230 | -1.4268 | 0.8546 |
| mods    | 0.6710   | 0.5241 | 1.2805  | 0.2004 | -0.3561 | 1.6982 |

---

Signif. codes: 0 '\*\*\*' 0.001 '\*\*' 0.01 '\*' 0.05 '.' 0.1 ' ' 1

[1] "MiscMeds"

[1] 3

Multivariate Meta-Analysis Model (k = 54; method: REML)

Variance Components:

|           | estim  | sqrt   | nlvls | fixed | factor         |
|-----------|--------|--------|-------|-------|----------------|
| sigma^2.1 | 0.7540 | 0.8683 | 27    | no    | Author         |
| sigma^2.2 | 1.3655 | 1.1685 | 37    | no    | Author/StudyID |

Test for Residual Heterogeneity:

QE(df = 52) = 198.3370, p-val < .0001

Test of Moderators (coefficient(s) 2):

QM(df = 1) = 1.2338, p-val = 0.2667

Model Results:

|         | estimate | se     | zval    | pval   | ci.lb   | ci.ub  |
|---------|----------|--------|---------|--------|---------|--------|
| intrcpt | -0.4512  | 0.5282 | -0.8543 | 0.3929 | -1.4864 | 0.5840 |
| mods    | 0.5621   | 0.5060 | 1.1108  | 0.2667 | -0.4297 | 1.5539 |

---

Signif. codes: 0 '\*\*\*' 0.001 '\*\*' 0.01 '\*' 0.05 '.' 0.1 ' ' 1

[1] "MiscMeds"

[1] 4

Multivariate Meta-Analysis Model (k = 54; method: REML)

Variance Components:

|           | estim  | sqrt   | nlvls | fixed | factor         |
|-----------|--------|--------|-------|-------|----------------|
| sigma^2.1 | 1.1857 | 1.0889 | 27    | no    | Author         |
| sigma^2.2 | 0.0000 | 0.0001 | 37    | no    | Author/StudyID |

Test for Residual Heterogeneity:

QE(df = 52) = 106.1010, p-val < .0001

Test of Moderators (coefficient(s) 2):

QM(df = 1) = 3.7190, p-val = 0.0538

Model Results:

|  | estimate | se | zval | pval | ci.lb | ci.ub |
|--|----------|----|------|------|-------|-------|
|--|----------|----|------|------|-------|-------|

```
intrcpt    0.3099  0.4626  0.6699  0.5029  -0.5968  1.2167
mods       0.7585  0.3933  1.9285  0.0538  -0.0124  1.5294 .
```

---

Signif. codes: 0 '\*\*\*' 0.001 '\*\*' 0.01 '\*' 0.05 '.' 0.1 ' ' 1

[1] "MiscMeds"

[1] 5

Multivariate Meta-Analysis Model (k = 54; method: REML)

Variance Components:

|           | estim  | sqrt   | nlvls | fixed | factor         |
|-----------|--------|--------|-------|-------|----------------|
| sigma^2.1 | 0.0000 | 0.0001 | 27    | no    | Author         |
| sigma^2.2 | 1.1331 | 1.0645 | 37    | no    | Author/StudyID |

Test for Residual Heterogeneity:

QE(df = 52) = 123.3111, p-val < .0001

Test of Moderators (coefficient(s) 2):

QM(df = 1) = 4.7770, p-val = 0.0288

Model Results:

|         | estimate | se     | zval    | pval   | ci.lb   | ci.ub    |
|---------|----------|--------|---------|--------|---------|----------|
| intrcpt | -0.1702  | 0.4545 | -0.3744 | 0.7081 | -1.0609 | 0.7206   |
| mods    | 0.9198   | 0.4208 | 2.1856  | 0.0288 | 0.0950  | 1.7446 * |

---

Signif. codes: 0 '\*\*\*' 0.001 '\*\*' 0.01 '\*' 0.05 '.' 0.1 ' ' 1

[1] "Psychostimulants"

[1] 0

Multivariate Meta-Analysis Model (k = 19; method: REML)

Variance Components:

|           | estim  | sqrt   | nlvls | fixed | factor         |
|-----------|--------|--------|-------|-------|----------------|
| sigma^2.1 | 0.4836 | 0.6954 | 8     | no    | Author         |
| sigma^2.2 | 0.5910 | 0.7688 | 13    | no    | Author/StudyID |

Test for Residual Heterogeneity:

QE(df = 17) = 46.3431, p-val = 0.0002

Test of Moderators (coefficient(s) 2):

QM(df = 1) = 3.0608, p-val = 0.0802

Model Results:

|         | estimate | se     | zval    | pval   | ci.lb   | ci.ub  |
|---------|----------|--------|---------|--------|---------|--------|
| intrcpt | -0.4426  | 0.6702 | -0.6604 | 0.5090 | -1.7561 | 0.8709 |

mods 1.3591 0.7768 1.7495 0.0802 -0.1635 2.8817 .

---

Signif. codes: 0 '\*\*\*' 0.001 '\*\*' 0.01 '\*' 0.05 '.' 0.1 ' ' 1

[1] "Psychostimulants"

[1] 1

Multivariate Meta-Analysis Model (k = 24; method: REML)

Variance Components:

|           | estim  | sqrt   | nlvls | fixed | factor         |
|-----------|--------|--------|-------|-------|----------------|
| sigma^2.1 | 0.3924 | 0.6264 | 10    | no    | Author         |
| sigma^2.2 | 0.4654 | 0.6822 | 17    | no    | Author/StudyID |

Test for Residual Heterogeneity:

QE(df = 22) = 49.2371, p-val = 0.0007

Test of Moderators (coefficient(s) 2):

QM(df = 1) = 5.9121, p-val = 0.0150

Model Results:

|         | estimate | se     | zval    | pval   | ci.lb   | ci.ub    |
|---------|----------|--------|---------|--------|---------|----------|
| intrcpt | -0.4893  | 0.5752 | -0.8506 | 0.3950 | -1.6168 | 0.6382   |
| mods    | 1.3659   | 0.5617 | 2.4315  | 0.0150 | 0.2649  | 2.4669 * |

---

Signif. codes: 0 '\*\*\*' 0.001 '\*\*' 0.01 '\*' 0.05 '.' 0.1 ' ' 1

[1] "Psychostimulants"

[1] 2

Multivariate Meta-Analysis Model (k = 24; method: REML)

Variance Components:

|           | estim  | sqrt   | nlvls | fixed | factor         |
|-----------|--------|--------|-------|-------|----------------|
| sigma^2.1 | 1.9887 | 1.4102 | 10    | no    | Author         |
| sigma^2.2 | 0.8559 | 0.9252 | 17    | no    | Author/StudyID |

Test for Residual Heterogeneity:

QE(df = 22) = 82.9868, p-val < .0001

Test of Moderators (coefficient(s) 2):

QM(df = 1) = 0.0195, p-val = 0.8890

Model Results:

|         | estimate | se     | zval    | pval   | ci.lb   | ci.ub  |
|---------|----------|--------|---------|--------|---------|--------|
| intrcpt | -0.0579  | 0.9239 | -0.0627 | 0.9500 | -1.8686 | 1.7528 |
| mods    | 0.1183   | 0.8475 | 0.1396  | 0.8890 | -1.5427 | 1.7793 |

---

Signif. codes: 0 '\*\*\*' 0.001 '\*\*' 0.01 '\*' 0.05 '.' 0.1 ' ' 1

[1] "Psychostimulants"

[1] 3

Multivariate Meta-Analysis Model (k = 24; method: REML)

Variance Components:

|           | estim  | sqrt   | nlvls | fixed | factor         |
|-----------|--------|--------|-------|-------|----------------|
| sigma^2.1 | 1.9826 | 1.4081 | 10    | no    | Author         |
| sigma^2.2 | 0.9826 | 0.9913 | 17    | no    | Author/StudyID |

Test for Residual Heterogeneity:

QE(df = 22) = 84.3098, p-val < .0001

Test of Moderators (coefficient(s) 2):

QM(df = 1) = 0.0528, p-val = 0.8183

Model Results:

|         | estimate | se     | zval    | pval   | ci.lb   | ci.ub  |
|---------|----------|--------|---------|--------|---------|--------|
| intrcpt | 0.1815   | 0.9131 | 0.1987  | 0.8425 | -1.6081 | 1.9710 |
| mods    | -0.1870  | 0.8141 | -0.2297 | 0.8183 | -1.7826 | 1.4086 |

---

Signif. codes: 0 '\*\*\*' 0.001 '\*\*' 0.01 '\*' 0.05 '.' 0.1 ' ' 1

[1] "Psychostimulants"

[1] 4

Multivariate Meta-Analysis Model (k = 24; method: REML)

Variance Components:

|           | estim  | sqrt   | nlvls | fixed | factor         |
|-----------|--------|--------|-------|-------|----------------|
| sigma^2.1 | 0.3924 | 0.6264 | 10    | no    | Author         |
| sigma^2.2 | 0.4654 | 0.6822 | 17    | no    | Author/StudyID |

Test for Residual Heterogeneity:

QE(df = 22) = 49.2371, p-val = 0.0007

Test of Moderators (coefficient(s) 2):

QM(df = 1) = 5.9121, p-val = 0.0150

Model Results:

|         | estimate | se     | zval    | pval   | ci.lb   | ci.ub    |
|---------|----------|--------|---------|--------|---------|----------|
| intrcpt | -0.4893  | 0.5752 | -0.8506 | 0.3950 | -1.6168 | 0.6382   |
| mods    | 1.3659   | 0.5617 | 2.4315  | 0.0150 | 0.2649  | 2.4669 * |

---

Signif. codes: 0 '\*\*\*' 0.001 '\*\*' 0.01 '\*' 0.05 '.' 0.1 ' ' 1

[1] "Psychostimulants"

[1] 5

Multivariate Meta-Analysis Model (k = 24; method: REML)

Variance Components:

|           | estim  | sqrt   | nlvls | fixed | factor         |
|-----------|--------|--------|-------|-------|----------------|
| sigma^2.1 | 0.4382 | 0.6620 | 10    | no    | Author         |
| sigma^2.2 | 2.0622 | 1.4360 | 17    | no    | Author/StudyID |

Test for Residual Heterogeneity:

QE(df = 22) = 80.8123, p-val < .0001

Test of Moderators (coefficient(s) 2):

QM(df = 1) = 0.0752, p-val = 0.7839

Model Results:

|         | estimate | se     | zval   | pval   | ci.lb   | ci.ub  |
|---------|----------|--------|--------|--------|---------|--------|
| intrcpt | 0.0604   | 0.8123 | 0.0743 | 0.9407 | -1.5317 | 1.6524 |
| mods    | 0.2115   | 0.7711 | 0.2742 | 0.7839 | -1.2998 | 1.7228 |

---

Signif. codes: 0 '\*\*\*' 0.001 '\*\*' 0.01 '\*' 0.05 '.' 0.1 ' ' 1

[1] "Anticonvulsants"

[1] 0

Multivariate Meta-Analysis Model (k = 17; method: REML)

Variance Components:

|           | estim  | sqrt   | nlvls | fixed | factor         |
|-----------|--------|--------|-------|-------|----------------|
| sigma^2.1 | 0.3704 | 0.6086 | 12    | no    | Author         |
| sigma^2.2 | 0.0000 | 0.0001 | 14    | no    | Author/StudyID |

Test for Residual Heterogeneity:

QE(df = 15) = 29.5457, p-val = 0.0137

Test of Moderators (coefficient(s) 2):

QM(df = 1) = 15.7017, p-val < .0001

Model Results:

|         | estimate | se     | zval    | pval   | ci.lb   | ci.ub   |     |
|---------|----------|--------|---------|--------|---------|---------|-----|
| intrcpt | -1.3255  | 0.5299 | -2.5012 | 0.0124 | -2.3641 | -0.2868 | *   |
| mods    | 2.7236   | 0.6873 | 3.9625  | <.0001 | 1.3764  | 4.0707  | *** |

---

Signif. codes: 0 '\*\*\*' 0.001 '\*\*' 0.01 '\*' 0.05 '.' 0.1 ' ' 1

[1] "Anticonvulsants"

[1] 1

Multivariate Meta-Analysis Model (k = 20; method: REML)

Variance Components:

|           | estim  | sqrt   | nlvls | fixed | factor         |
|-----------|--------|--------|-------|-------|----------------|
| sigma^2.1 | 0.3970 | 0.6301 | 14    | no    | Author         |
| sigma^2.2 | 0.0000 | 0.0001 | 16    | no    | Author/StudyID |

Test for Residual Heterogeneity:

QE(df = 18) = 32.9050, p-val = 0.0171

Test of Moderators (coefficient(s) 2):

QM(df = 1) = 21.3924, p-val < .0001

Model Results:

|         | estimate | se     | zval    | pval   | ci.lb   | ci.ub   |     |
|---------|----------|--------|---------|--------|---------|---------|-----|
| intrcpt | -1.3947  | 0.5320 | -2.6215 | 0.0088 | -2.4375 | -0.3519 | **  |
| mods    | 2.9675   | 0.6416 | 4.6252  | <.0001 | 1.7100  | 4.2250  | *** |

---

Signif. codes: 0 '\*\*\*' 0.001 '\*\*' 0.01 '\*' 0.05 '.' 0.1 ' ' 1

[1] "Anticonvulsants"

[1] 2

Multivariate Meta-Analysis Model (k = 20; method: REML)

Variance Components:

|           | estim  | sqrt   | nlvls | fixed | factor         |
|-----------|--------|--------|-------|-------|----------------|
| sigma^2.1 | 0.9235 | 0.9610 | 14    | no    | Author         |
| sigma^2.2 | 0.0000 | 0.0001 | 16    | no    | Author/StudyID |

Test for Residual Heterogeneity:

QE(df = 18) = 47.2131, p-val = 0.0002

Test of Moderators (coefficient(s) 2):

QM(df = 1) = 14.9264, p-val = 0.0001

Model Results:

|         | estimate | se     | zval    | pval   | ci.lb   | ci.ub   |     |
|---------|----------|--------|---------|--------|---------|---------|-----|
| intrcpt | -1.8601  | 0.6100 | -3.0491 | 0.0023 | -3.0557 | -0.6644 | **  |
| mods    | 3.0847   | 0.7984 | 3.8635  | 0.0001 | 1.5198  | 4.6496  | *** |

---

Signif. codes: 0 '\*\*\*' 0.001 '\*\*' 0.01 '\*' 0.05 '.' 0.1 ' ' 1

```
[1] "Anticonvulsants"
[1] 3
```

Multivariate Meta-Analysis Model (k = 20; method: REML)

Variance Components:

|           | estim  | sqrt   | nlvls | fixed | factor         |
|-----------|--------|--------|-------|-------|----------------|
| sigma^2.1 | 0.9034 | 0.9505 | 14    | no    | Author         |
| sigma^2.2 | 0.0000 | 0.0001 | 16    | no    | Author/StudyID |

Test for Residual Heterogeneity:  
QE(df = 18) = 46.2202, p-val = 0.0003

Test of Moderators (coefficient(s) 2):  
QM(df = 1) = 14.8811, p-val = 0.0001

Model Results:

|         | estimate | se     | zval    | pval   | ci.lb   | ci.ub   |     |
|---------|----------|--------|---------|--------|---------|---------|-----|
| intrcpt | -1.8256  | 0.6035 | -3.0248 | 0.0025 | -3.0085 | -0.6427 | **  |
| mods    | 3.0539   | 0.7917 | 3.8576  | 0.0001 | 1.5023  | 4.6055  | *** |

---  
Signif. codes: 0 '\*\*\*' 0.001 '\*\*' 0.01 '\*' 0.05 '.' 0.1 ' ' 1

```
[1] "Anticonvulsants"
[1] 4
```

Multivariate Meta-Analysis Model (k = 20; method: REML)

Variance Components:

|           | estim  | sqrt   | nlvls | fixed | factor         |
|-----------|--------|--------|-------|-------|----------------|
| sigma^2.1 | 0.3970 | 0.6301 | 14    | no    | Author         |
| sigma^2.2 | 0.0000 | 0.0001 | 16    | no    | Author/StudyID |

Test for Residual Heterogeneity:  
QE(df = 18) = 32.9050, p-val = 0.0171

Test of Moderators (coefficient(s) 2):  
QM(df = 1) = 21.3924, p-val < .0001

Model Results:

|         | estimate | se     | zval    | pval   | ci.lb   | ci.ub   |     |
|---------|----------|--------|---------|--------|---------|---------|-----|
| intrcpt | -1.3947  | 0.5320 | -2.6215 | 0.0088 | -2.4375 | -0.3519 | **  |
| mods    | 2.9675   | 0.6416 | 4.6252  | <.0001 | 1.7100  | 4.2250  | *** |

---  
Signif. codes: 0 '\*\*\*' 0.001 '\*\*' 0.01 '\*' 0.05 '.' 0.1 ' ' 1

```
[1] "Anticonvulsants"
[1] 5
```

Multivariate Meta-Analysis Model (k = 20; method: REML)

Variance Components:

|           | estim  | sqrt   | nlvls | fixed | factor         |
|-----------|--------|--------|-------|-------|----------------|
| sigma^2.1 | 0.3970 | 0.6301 | 14    | no    | Author         |
| sigma^2.2 | 0.0000 | 0.0001 | 16    | no    | Author/StudyID |

Test for Residual Heterogeneity:  
QE(df = 18) = 32.9050, p-val = 0.0171

Test of Moderators (coefficient(s) 2):  
QM(df = 1) = 21.3924, p-val < .0001

Model Results:

|         | estimate | se     | zval    | pval   | ci.lb   | ci.ub   |     |
|---------|----------|--------|---------|--------|---------|---------|-----|
| intrcpt | -1.3947  | 0.5320 | -2.6215 | 0.0088 | -2.4375 | -0.3519 | **  |
| mods    | 2.9675   | 0.6416 | 4.6252  | <.0001 | 1.7100  | 4.2250  | *** |

---  
Signif. codes: 0 '\*\*\*' 0.001 '\*\*' 0.01 '\*' 0.05 '.' 0.1 ' ' 1

```
[1] "DopamineAgonists"
[1] 0
```

Multivariate Meta-Analysis Model (k = 18; method: REML)

Variance Components:

|           | estim  | sqrt   | nlvls | fixed | factor         |
|-----------|--------|--------|-------|-------|----------------|
| sigma^2.1 | 0.0000 | 0.0001 | 9     | no    | Author         |
| sigma^2.2 | 0.2556 | 0.5056 | 10    | no    | Author/StudyID |

Test for Residual Heterogeneity:  
QE(df = 16) = 22.3523, p-val = 0.1322

Test of Moderators (coefficient(s) 2):  
QM(df = 1) = 4.2579, p-val = 0.0391

Model Results:

|         | estimate | se     | zval    | pval   | ci.lb   | ci.ub   |   |
|---------|----------|--------|---------|--------|---------|---------|---|
| intrcpt | -0.9012  | 0.3685 | -2.4452 | 0.0145 | -1.6235 | -0.1788 | * |
| mods    | 1.1913   | 0.5773 | 2.0635  | 0.0391 | 0.0598  | 2.3228  | * |

---  
Signif. codes: 0 '\*\*\*' 0.001 '\*\*' 0.01 '\*' 0.05 '.' 0.1 ' ' 1

```
[1] "DopamineAgonists"
```



[1] 1

Multivariate Meta-Analysis Model (k = 20; method: REML)

Variance Components:

|           | estim  | sqrt   | nlvls | fixed | factor         |
|-----------|--------|--------|-------|-------|----------------|
| sigma^2.1 | 0.2785 | 0.5278 | 10    | no    | Author         |
| sigma^2.2 | 0.0000 | 0.0001 | 12    | no    | Author/StudyID |

Test for Residual Heterogeneity:

QE(df = 18) = 26.2047, p-val = 0.0952

Test of Moderators (coefficient(s) 2):

QM(df = 1) = 10.7469, p-val = 0.0010

Model Results:

|         | estimate | se     | zval    | pval   | ci.lb   | ci.ub   |    |
|---------|----------|--------|---------|--------|---------|---------|----|
| intrcpt | -1.0335  | 0.3528 | -2.9297 | 0.0034 | -1.7249 | -0.3421 | ** |
| mods    | 1.6644   | 0.5077 | 3.2783  | 0.0010 | 0.6693  | 2.6595  | ** |

---

Signif. codes: 0 '\*\*\*' 0.001 '\*\*' 0.01 '\*' 0.05 '.' 0.1 ' ' 1

[1] "DopamineAgonists"

[1] 2

Multivariate Meta-Analysis Model (k = 20; method: REML)

Variance Components:

|           | estim  | sqrt   | nlvls | fixed | factor         |
|-----------|--------|--------|-------|-------|----------------|
| sigma^2.1 | 0.0000 | 0.0000 | 10    | no    | Author         |
| sigma^2.2 | 0.8971 | 0.9471 | 12    | no    | Author/StudyID |

Test for Residual Heterogeneity:

QE(df = 18) = 40.0693, p-val = 0.0020

Test of Moderators (coefficient(s) 2):

QM(df = 1) = 1.9548, p-val = 0.1621

Model Results:

|         | estimate | se     | zval    | pval   | ci.lb   | ci.ub   |   |
|---------|----------|--------|---------|--------|---------|---------|---|
| intrcpt | -1.0620  | 0.4838 | -2.1951 | 0.0282 | -2.0102 | -0.1138 | * |
| mods    | 0.9904   | 0.7084 | 1.3981  | 0.1621 | -0.3980 | 2.3788  |   |

---

Signif. codes: 0 '\*\*\*' 0.001 '\*\*' 0.01 '\*' 0.05 '.' 0.1 ' ' 1

[1] "DopamineAgonists"

[1] 3

Multivariate Meta-Analysis Model (k = 20; method: REML)

Variance Components:

|           | estim  | sqrt   | nlvls | fixed | factor         |
|-----------|--------|--------|-------|-------|----------------|
| sigma^2.1 | 0.0000 | 0.0000 | 10    | no    | Author         |
| sigma^2.2 | 0.9545 | 0.9770 | 12    | no    | Author/StudyID |

Test for Residual Heterogeneity:

QE(df = 18) = 41.2222, p-val = 0.0014

Test of Moderators (coefficient(s) 2):

QM(df = 1) = 1.8024, p-val = 0.1794

Model Results:

|         | estimate | se     | zval    | pval   | ci.lb   | ci.ub   |   |
|---------|----------|--------|---------|--------|---------|---------|---|
| intrcpt | -1.0616  | 0.4944 | -2.1471 | 0.0318 | -2.0307 | -0.0925 | * |
| mods    | 0.9642   | 0.7182 | 1.3425  | 0.1794 | -0.4434 | 2.3719  |   |

---

Signif. codes: 0 '\*\*\*' 0.001 '\*\*' 0.01 '\*' 0.05 '.' 0.1 ' ' 1

[1] "DopamineAgonists"

[1] 4

Multivariate Meta-Analysis Model (k = 20; method: REML)

Variance Components:

|           | estim  | sqrt   | nlvls | fixed | factor         |
|-----------|--------|--------|-------|-------|----------------|
| sigma^2.1 | 0.2785 | 0.5278 | 10    | no    | Author         |
| sigma^2.2 | 0.0000 | 0.0001 | 12    | no    | Author/StudyID |

Test for Residual Heterogeneity:

QE(df = 18) = 26.2047, p-val = 0.0952

Test of Moderators (coefficient(s) 2):

QM(df = 1) = 10.7469, p-val = 0.0010

Model Results:

|         | estimate | se     | zval    | pval   | ci.lb   | ci.ub   |    |
|---------|----------|--------|---------|--------|---------|---------|----|
| intrcpt | -1.0335  | 0.3528 | -2.9297 | 0.0034 | -1.7249 | -0.3421 | ** |
| mods    | 1.6644   | 0.5077 | 3.2783  | 0.0010 | 0.6693  | 2.6595  | ** |

---

Signif. codes: 0 '\*\*\*' 0.001 '\*\*' 0.01 '\*' 0.05 '.' 0.1 ' ' 1

[1] "DopamineAgonists"

[1] 5

Multivariate Meta-Analysis Model (k = 20; method: REML)

Variance Components:

|           | estim  | sqrt   | nlvls | fixed | factor         |
|-----------|--------|--------|-------|-------|----------------|
| sigma^2.1 | 0.2785 | 0.5278 | 10    | no    | Author         |
| sigma^2.2 | 0.0000 | 0.0001 | 12    | no    | Author/StudyID |

Test for Residual Heterogeneity:

QE(df = 18) = 26.2047, p-val = 0.0952

Test of Moderators (coefficient(s) 2):

QM(df = 1) = 10.7469, p-val = 0.0010

Model Results:

|         | estimate | se     | zval    | pval   | ci.lb   | ci.ub   |    |
|---------|----------|--------|---------|--------|---------|---------|----|
| intrcpt | -1.0335  | 0.3528 | -2.9297 | 0.0034 | -1.7249 | -0.3421 | ** |
| mods    | 1.6644   | 0.5077 | 3.2783  | 0.0010 | 0.6693  | 2.6595  | ** |

---

Signif. codes: 0 '\*\*\*' 0.001 '\*\*' 0.01 '\*' 0.05 '.' 0.1 ' ' 1

[1] "Antidepressants"

[1] 0

Multivariate Meta-Analysis Model (k = 15; method: REML)

Variance Components:

|           | estim  | sqrt   | nlvls | fixed | factor         |
|-----------|--------|--------|-------|-------|----------------|
| sigma^2.1 | 0.0000 | 0.0001 | 8     | no    | Author         |
| sigma^2.2 | 0.0000 | 0.0001 | 8     | no    | Author/StudyID |

Test for Residual Heterogeneity:

QE(df = 13) = 14.8644, p-val = 0.3159

Test of Moderators (coefficient(s) 2):

QM(df = 1) = 39.2060, p-val < .0001

Model Results:

|         | estimate | se     | zval    | pval   | ci.lb   | ci.ub   |     |
|---------|----------|--------|---------|--------|---------|---------|-----|
| intrcpt | -1.7957  | 0.5371 | -3.3433 | 0.0008 | -2.8483 | -0.7430 | *** |
| mods    | 3.3421   | 0.5338 | 6.2615  | <.0001 | 2.2960  | 4.3882  | *** |

---

Signif. codes: 0 '\*\*\*' 0.001 '\*\*' 0.01 '\*' 0.05 '.' 0.1 ' ' 1

[1] "Antidepressants"

[1] 1

Multivariate Meta-Analysis Model (k = 18; method: REML)

Variance Components:

|           | estim  | sqrt   | nlvls | fixed | factor         |
|-----------|--------|--------|-------|-------|----------------|
| sigma^2.1 | 0.0088 | 0.0939 | 11    | no    | Author         |
| sigma^2.2 | 0.0088 | 0.0939 | 11    | no    | Author/StudyID |

Test for Residual Heterogeneity:

QE(df = 16) = 16.4389, p-val = 0.4228

Test of Moderators (coefficient(s) 2):

QM(df = 1) = 44.6331, p-val < .0001

Model Results:

|         | estimate | se     | zval    | pval   | ci.lb   | ci.ub   |     |
|---------|----------|--------|---------|--------|---------|---------|-----|
| intrcpt | -1.4394  | 0.4231 | -3.4018 | 0.0007 | -2.2687 | -0.6101 | *** |
| mods    | 2.9627   | 0.4435 | 6.6808  | <.0001 | 2.0935  | 3.8319  | *** |

---

Signif. codes: 0 '\*\*\*' 0.001 '\*\*' 0.01 '\*' 0.05 '.' 0.1 ' ' 1

[1] "Antidepressants"

[1] 2

Multivariate Meta-Analysis Model (k = 18; method: REML)

Variance Components:

|           | estim  | sqrt   | nlvls | fixed | factor         |
|-----------|--------|--------|-------|-------|----------------|
| sigma^2.1 | 0.2311 | 0.4808 | 11    | no    | Author         |
| sigma^2.2 | 0.2311 | 0.4808 | 11    | no    | Author/StudyID |

Test for Residual Heterogeneity:

QE(df = 16) = 24.3265, p-val = 0.0826

Test of Moderators (coefficient(s) 2):

QM(df = 1) = 21.7454, p-val < .0001

Model Results:

|         | estimate | se     | zval    | pval   | ci.lb   | ci.ub   |     |
|---------|----------|--------|---------|--------|---------|---------|-----|
| intrcpt | -2.1752  | 0.7425 | -2.9296 | 0.0034 | -3.6305 | -0.7199 | **  |
| mods    | 3.4345   | 0.7365 | 4.6632  | <.0001 | 1.9910  | 4.8781  | *** |

---

Signif. codes: 0 '\*\*\*' 0.001 '\*\*' 0.01 '\*' 0.05 '.' 0.1 ' ' 1

[1] "Antidepressants"

[1] 3

Multivariate Meta-Analysis Model (k = 18; method: REML)

Variance Components:

|           | estim  | sqrt   | nlvls | fixed | factor         |
|-----------|--------|--------|-------|-------|----------------|
| sigma^2.1 | 0.5339 | 0.7307 | 11    | no    | Author         |
| sigma^2.2 | 0.5339 | 0.7307 | 11    | no    | Author/StudyID |

Test for Residual Heterogeneity:

QE(df = 16) = 32.9936, p-val = 0.0074

Test of Moderators (coefficient(s) 2):

QM(df = 1) = 17.3226, p-val < .0001

Model Results:

|         | estimate | se     | zval    | pval   | ci.lb   | ci.ub   |     |
|---------|----------|--------|---------|--------|---------|---------|-----|
| intrcpt | -2.4412  | 0.7974 | -3.0615 | 0.0022 | -4.0041 | -0.8784 | **  |
| mods    | 3.4176   | 0.8211 | 4.1620  | <.0001 | 1.8082  | 5.0270  | *** |

---

Signif. codes: 0 '\*\*\*' 0.001 '\*\*' 0.01 '\*' 0.05 '.' 0.1 ' ' 1

[1] "Antidepressants"

[1] 4

Multivariate Meta-Analysis Model (k = 18; method: REML)

Variance Components:

|           | estim  | sqrt   | nlvls | fixed | factor         |
|-----------|--------|--------|-------|-------|----------------|
| sigma^2.1 | 0.0000 | 0.0000 | 11    | no    | Author         |
| sigma^2.2 | 0.0000 | 0.0000 | 11    | no    | Author/StudyID |

Test for Residual Heterogeneity:

QE(df = 16) = 15.8653, p-val = 0.4624

Test of Moderators (coefficient(s) 2):

QM(df = 1) = 39.8996, p-val < .0001

Model Results:

|         | estimate | se     | zval    | pval   | ci.lb   | ci.ub   |     |
|---------|----------|--------|---------|--------|---------|---------|-----|
| intrcpt | -1.7312  | 0.5327 | -3.2497 | 0.0012 | -2.7753 | -0.6871 | **  |
| mods    | 3.2204   | 0.5098 | 6.3166  | <.0001 | 2.2212  | 4.2197  | *** |

---

Signif. codes: 0 '\*\*\*' 0.001 '\*\*' 0.01 '\*' 0.05 '.' 0.1 ' ' 1

[1] "Antidepressants"

[1] 5

Multivariate Meta-Analysis Model (k = 18; method: REML)

Variance Components:

|           | estim  | sqrt   | nlvls | fixed | factor         |
|-----------|--------|--------|-------|-------|----------------|
| sigma^2.1 | 0.0000 | 0.0000 | 11    | no    | Author         |
| sigma^2.2 | 0.0000 | 0.0000 | 11    | no    | Author/StudyID |

Test for Residual Heterogeneity:

QE(df = 16) = 15.8653, p-val = 0.4624

Test of Moderators (coefficient(s) 2):

QM(df = 1) = 39.8996, p-val < .0001

Model Results:

|         | estimate | se     | zval    | pval   | ci.lb   | ci.ub   |     |
|---------|----------|--------|---------|--------|---------|---------|-----|
| intrcpt | -1.7312  | 0.5327 | -3.2497 | 0.0012 | -2.7753 | -0.6871 | **  |
| mods    | 3.2204   | 0.5098 | 6.3166  | <.0001 | 2.2212  | 4.2197  | *** |

---

Signif. codes: 0 '\*\*\*' 0.001 '\*\*' 0.01 '\*' 0.05 '.' 0.1 ' ' 1

[1] "Antipsychotics"

[1] 0

Multivariate Meta-Analysis Model (k = 11; method: REML)

Variance Components:

|           | estim  | sqrt   | nlvls | fixed | factor         |
|-----------|--------|--------|-------|-------|----------------|
| sigma^2.1 | 0.6061 | 0.7785 | 7     | no    | Author         |
| sigma^2.2 | 0.0000 | 0.0000 | 8     | no    | Author/StudyID |

Test for Residual Heterogeneity:

QE(df = 9) = 15.9240, p-val = 0.0685

Test of Moderators (coefficient(s) 2):

QM(df = 1) = 0.0759, p-val = 0.7830

Model Results:

|         | estimate | se     | zval    | pval   | ci.lb   | ci.ub  |
|---------|----------|--------|---------|--------|---------|--------|
| intrcpt | -0.4668  | 0.7468 | -0.6250 | 0.5320 | -1.9305 | 0.9970 |
| mods    | -0.2106  | 0.7644 | -0.2755 | 0.7830 | -1.7087 | 1.2876 |

---

Signif. codes: 0 '\*\*\*' 0.001 '\*\*' 0.01 '\*' 0.05 '.' 0.1 ' ' 1

[1] "Antipsychotics"

[1] 1

Multivariate Meta-Analysis Model (k = 12; method: REML)

Variance Components:

|           | estim  | sqrt   | nlvls | fixed | factor         |
|-----------|--------|--------|-------|-------|----------------|
| sigma^2.1 | 2.5846 | 1.6077 | 8     | no    | Author         |
| sigma^2.2 | 0.0000 | 0.0000 | 9     | no    | Author/StudyID |

Test for Residual Heterogeneity:

QE(df = 10) = 32.3451, p-val = 0.0004

Test of Moderators (coefficient(s) 2):

QM(df = 1) = 0.2031, p-val = 0.6522

Model Results:

|         | estimate | se     | zval    | pval   | ci.lb   | ci.ub  |
|---------|----------|--------|---------|--------|---------|--------|
| intrcpt | 0.3107   | 1.0188 | 0.3049  | 0.7604 | -1.6861 | 2.3075 |
| mods    | -0.3920  | 0.8699 | -0.4507 | 0.6522 | -2.0969 | 1.3129 |

---

Signif. codes: 0 '\*\*\*' 0.001 '\*\*' 0.01 '\*' 0.05 '.' 0.1 ' ' 1

[1] "Antipsychotics"

[1] 2

Multivariate Meta-Analysis Model (k = 12; method: REML)

Variance Components:

|           | estim  | sqrt   | nlvls | fixed | factor         |
|-----------|--------|--------|-------|-------|----------------|
| sigma^2.1 | 0.3001 | 0.5478 | 8     | no    | Author         |
| sigma^2.2 | 0.0000 | 0.0000 | 9     | no    | Author/StudyID |

Test for Residual Heterogeneity:

QE(df = 10) = 15.9437, p-val = 0.1013

Test of Moderators (coefficient(s) 2):

QM(df = 1) = 0.0138, p-val = 0.9064

Model Results:

|         | estimate | se     | zval    | pval   | ci.lb   | ci.ub  |
|---------|----------|--------|---------|--------|---------|--------|
| intrcpt | -0.8338  | 0.5416 | -1.5396 | 0.1237 | -1.8953 | 0.2277 |
| mods    | 0.0772   | 0.6567 | 0.1176  | 0.9064 | -1.2099 | 1.3643 |

---

Signif. codes: 0 '\*\*\*' 0.001 '\*\*' 0.01 '\*' 0.05 '.' 0.1 ' ' 1

[1] "Antipsychotics"

[1] 3

Multivariate Meta-Analysis Model (k = 12; method: REML)

Variance Components:

|  | estim | sqrt | nlvls | fixed | factor |
|--|-------|------|-------|-------|--------|
|--|-------|------|-------|-------|--------|

```
sigma^2.1  0.3001  0.5478      8    no          Author
sigma^2.2  0.0000  0.0000      9    no Author/StudyID
```

Test for Residual Heterogeneity:  
QE(df = 10) = 15.9437, p-val = 0.1013

Test of Moderators (coefficient(s) 2):  
QM(df = 1) = 0.0138, p-val = 0.9064

Model Results:

|         | estimate | se     | zval    | pval   | ci.lb   | ci.ub  |
|---------|----------|--------|---------|--------|---------|--------|
| intrcpt | -0.8338  | 0.5416 | -1.5396 | 0.1237 | -1.8953 | 0.2277 |
| mods    | 0.0772   | 0.6567 | 0.1176  | 0.9064 | -1.2099 | 1.3643 |

---  
Signif. codes: 0 '\*\*\*' 0.001 '\*\*' 0.01 '\*' 0.05 '.' 0.1 ' ' 1

[1] "Antipsychotics"  
[1] 4

Multivariate Meta-Analysis Model (k = 12; method: REML)

Variance Components:

|           | estim  | sqrt   | nlvls | fixed | factor         |
|-----------|--------|--------|-------|-------|----------------|
| sigma^2.1 | 1.8713 | 1.3679 | 8     | no    | Author         |
| sigma^2.2 | 0.0000 | 0.0000 | 9     | no    | Author/StudyID |

Test for Residual Heterogeneity:  
QE(df = 10) = 38.0970, p-val < .0001

Test of Moderators (coefficient(s) 2):  
QM(df = 1) = 0.9041, p-val = 0.3417

Model Results:

|         | estimate | se     | zval    | pval   | ci.lb   | ci.ub  |
|---------|----------|--------|---------|--------|---------|--------|
| intrcpt | 0.5121   | 0.8768 | 0.5841  | 0.5592 | -1.2064 | 2.2307 |
| mods    | -0.7907  | 0.8315 | -0.9509 | 0.3417 | -2.4205 | 0.8391 |

---  
Signif. codes: 0 '\*\*\*' 0.001 '\*\*' 0.01 '\*' 0.05 '.' 0.1 ' ' 1

[1] "Antipsychotics"  
[1] 5

Multivariate Meta-Analysis Model (k = 12; method: REML)

Variance Components:

|           | estim  | sqrt   | nlvls | fixed | factor |
|-----------|--------|--------|-------|-------|--------|
| sigma^2.1 | 0.5057 | 0.7111 | 8     | no    | Author |



sigma^2.2 0.0000 0.0000 9 no Author/StudyID

Test for Residual Heterogeneity:

QE(df = 10) = 18.7211, p-val = 0.0440

Test of Moderators (coefficient(s) 2):

QM(df = 1) = 0.2555, p-val = 0.6133

Model Results:

|         | estimate | se     | zval    | pval   | ci.lb   | ci.ub  |
|---------|----------|--------|---------|--------|---------|--------|
| intrcpt | -0.2947  | 0.5895 | -0.4998 | 0.6172 | -1.4501 | 0.8608 |
| mods    | -0.3438  | 0.6802 | -0.5054 | 0.6133 | -1.6769 | 0.9893 |

---

Signif. codes: 0 '\*\*\*' 0.001 '\*\*' 0.01 '\*' 0.05 '.' 0.1 ' ' 1

[1] "Full Model"

[1] 0

Multivariate Meta-Analysis Model (k = 314; method: REML)

Variance Components:

|           | estim  | sqrt   | nlvls | fixed | factor         |
|-----------|--------|--------|-------|-------|----------------|
| sigma^2.1 | 0.9313 | 0.9650 | 79    | no    | Author         |
| sigma^2.2 | 0.6442 | 0.8026 | 120   | no    | Author/StudyID |

Test for Residual Heterogeneity:

QE(df = 312) = 1056.9190, p-val < .0001

Test of Moderators (coefficient(s) 2):

QM(df = 1) = 2.4776, p-val = 0.1155

Model Results:

|         | estimate | se     | zval   | pval   | ci.lb   | ci.ub    |
|---------|----------|--------|--------|--------|---------|----------|
| intrcpt | 0.4636   | 0.2063 | 2.2476 | 0.0246 | 0.0593  | 0.8679 * |
| mods    | 0.3130   | 0.1989 | 1.5740 | 0.1155 | -0.0767 | 0.7028   |

---

Signif. codes: 0 '\*\*\*' 0.001 '\*\*' 0.01 '\*' 0.05 '.' 0.1 ' ' 1

[1] "Full Model"

[1] 1

Multivariate Meta-Analysis Model (k = 402; method: REML)

Variance Components:

|           | estim  | sqrt   | nlvls | fixed | factor         |
|-----------|--------|--------|-------|-------|----------------|
| sigma^2.1 | 0.9940 | 0.9970 | 98    | no    | Author         |
| sigma^2.2 | 0.7667 | 0.8756 | 157   | no    | Author/StudyID |

Test for Residual Heterogeneity:  
QE(df = 400) = 1356.3866, p-val < .0001

Test of Moderators (coefficient(s) 2):  
QM(df = 1) = 24.2349, p-val < .0001

Model Results:

|         | estimate | se     | zval   | pval   | ci.lb  | ci.ub  |     |
|---------|----------|--------|--------|--------|--------|--------|-----|
| intrcpt | 0.3899   | 0.1967 | 1.9824 | 0.0474 | 0.0044 | 0.7755 | *   |
| mods    | 0.8445   | 0.1716 | 4.9229 | <.0001 | 0.5083 | 1.1808 | *** |

---  
Signif. codes: 0 '\*\*\*' 0.001 '\*\*' 0.01 '\*' 0.05 '.' 0.1 ' ' 1

[1] "Full Model"  
[1] 2

Multivariate Meta-Analysis Model (k = 402; method: REML)

Variance Components:

|           | estim  | sqrt   | nlvls | fixed | factor         |
|-----------|--------|--------|-------|-------|----------------|
| sigma^2.1 | 0.9341 | 0.9665 | 98    | no    | Author         |
| sigma^2.2 | 0.9837 | 0.9918 | 157   | no    | Author/StudyID |

Test for Residual Heterogeneity:  
QE(df = 400) = 1717.7091, p-val < .0001

Test of Moderators (coefficient(s) 2):  
QM(df = 1) = 15.8142, p-val < .0001

Model Results:

|         | estimate | se     | zval    | pval   | ci.lb   | ci.ub  |     |
|---------|----------|--------|---------|--------|---------|--------|-----|
| intrcpt | -0.1829  | 0.1875 | -0.9756 | 0.3293 | -0.5503 | 0.1845 |     |
| mods    | 0.7109   | 0.1788 | 3.9767  | <.0001 | 0.3605  | 1.0613 | *** |

---  
Signif. codes: 0 '\*\*\*' 0.001 '\*\*' 0.01 '\*' 0.05 '.' 0.1 ' ' 1

[1] "Full Model"  
[1] 3

Multivariate Meta-Analysis Model (k = 402; method: REML)

Variance Components:

|           | estim  | sqrt   | nlvls | fixed | factor         |
|-----------|--------|--------|-------|-------|----------------|
| sigma^2.1 | 1.0729 | 1.0358 | 98    | no    | Author         |
| sigma^2.2 | 1.1675 | 1.0805 | 157   | no    | Author/StudyID |

Test for Residual Heterogeneity:  
QE(df = 400) = 1767.5876, p-val < .0001

Test of Moderators (coefficient(s) 2):  
QM(df = 1) = 1.0675, p-val = 0.3015

Model Results:

|         | estimate | se     | zval   | pval   | ci.lb   | ci.ub  |
|---------|----------|--------|--------|--------|---------|--------|
| intrcpt | 0.0389   | 0.1978 | 0.1967 | 0.8441 | -0.3489 | 0.4267 |
| mods    | 0.1963   | 0.1900 | 1.0332 | 0.3015 | -0.1761 | 0.5687 |

---  
Signif. codes: 0 '\*\*\*' 0.001 '\*\*' 0.01 '\*' 0.05 '.' 0.1 ' ' 1

[1] "Full Model"  
[1] 4

Multivariate Meta-Analysis Model (k = 402; method: REML)

Variance Components:

|           | estim  | sqrt   | nlvls | fixed | factor         |
|-----------|--------|--------|-------|-------|----------------|
| sigma^2.1 | 1.1213 | 1.0589 | 98    | no    | Author         |
| sigma^2.2 | 0.6921 | 0.8319 | 157   | no    | Author/StudyID |

Test for Residual Heterogeneity:  
QE(df = 400) = 1310.6344, p-val < .0001

Test of Moderators (coefficient(s) 2):  
QM(df = 1) = 14.5114, p-val = 0.0001

Model Results:

|         | estimate | se     | zval   | pval   | ci.lb  | ci.ub  |     |
|---------|----------|--------|--------|--------|--------|--------|-----|
| intrcpt | 0.5723   | 0.2068 | 2.7669 | 0.0057 | 0.1669 | 0.9776 | **  |
| mods    | 0.6885   | 0.1807 | 3.8094 | 0.0001 | 0.3343 | 1.0428 | *** |

---  
Signif. codes: 0 '\*\*\*' 0.001 '\*\*' 0.01 '\*' 0.05 '.' 0.1 ' ' 1

[1] "Full Model"  
[1] 5

Multivariate Meta-Analysis Model (k = 402; method: REML)

Variance Components:

|           | estim  | sqrt   | nlvls | fixed | factor         |
|-----------|--------|--------|-------|-------|----------------|
| sigma^2.1 | 0.5233 | 0.7234 | 98    | no    | Author         |
| sigma^2.2 | 1.3207 | 1.1492 | 157   | no    | Author/StudyID |

Test for Residual Heterogeneity:

QE(df = 400) = 1355.9961, p-val < .0001

Test of Moderators (coefficient(s) 2):

QM(df = 1) = 7.4209, p-val = 0.0064

Model Results:

|         | estimate | se     | zval   | pval   | ci.lb  | ci.ub  |    |
|---------|----------|--------|--------|--------|--------|--------|----|
| intrcpt | 0.3985   | 0.1964 | 2.0291 | 0.0425 | 0.0136 | 0.7834 | *  |
| mods    | 0.5050   | 0.1854 | 2.7241 | 0.0064 | 0.1417 | 0.8684 | ** |

---

Signif. codes: 0 '\*\*\*' 0.001 '\*\*' 0.01 '\*' 0.05 '.' 0.1 ' ' 1

### eMethods 3. Model Outputs in Data Sets (Subsetted by Treatment Category)

```
[1] "Placebo"  
[1] 0
```

Mixed-Effects Model (k = 77; tau<sup>2</sup> estimator: REML)

```
tau^2 (estimated amount of residual heterogeneity):    1.2507 (SE = 0.3318)  
tau (square root of estimated tau^2 value):          1.1183  
I^2 (residual heterogeneity / unaccounted variability): 68.72%  
H^2 (unaccounted variability / sampling variability):  3.20  
R^2 (amount of heterogeneity accounted for):         38.12%
```

Test for Residual Heterogeneity:  
QE(df = 71) = 201.5267, p-val < .0001

Test of Moderators (coefficient(s) 2,3,4,5,6):  
QM(df = 5) = 31.8170, p-val < .0001

Model Results:

|                 | estimate | se      | zval    | pval   | ci.lb     | ci.ub   |     |
|-----------------|----------|---------|---------|--------|-----------|---------|-----|
| intrcpt         | -67.2407 | 71.1746 | -0.9447 | 0.3448 | -206.7404 | 72.2590 |     |
| FU              | -0.0229  | 0.0445  | -0.5158 | 0.6060 | -0.1101   | 0.0642  |     |
| Year            | 0.0343   | 0.0360  | 0.9524  | 0.3409 | -0.0363   | 0.1048  |     |
| Proportion_Male | -0.3931  | 1.0174  | -0.3864 | 0.6992 | -2.3872   | 1.6009  |     |
| Mean_Age        | -0.0663  | 0.0420  | -1.5780 | 0.1146 | -0.1486   | 0.0160  |     |
| Complete        | 3.3005   | 0.6761  | 4.8815  | <.0001 | 1.9753    | 4.6257  | *** |

---

Signif. codes: 0 '\*\*\*' 0.001 '\*\*' 0.01 '\*' 0.05 '.' 0.1 ' ' 1

```
[1] "Psychotherapy"  
[1] 0
```

Mixed-Effects Model (k = 246; tau<sup>2</sup> estimator: REML)

```
tau^2 (estimated amount of residual heterogeneity):    0.9985 (SE = 0.1483)  
tau (square root of estimated tau^2 value):          0.9992  
I^2 (residual heterogeneity / unaccounted variability): 68.46%  
H^2 (unaccounted variability / sampling variability):  3.17  
R^2 (amount of heterogeneity accounted for):         44.29%
```

Test for Residual Heterogeneity:  
QE(df = 240) = 650.7375, p-val < .0001

Test of Moderators (coefficient(s) 2,3,4,5,6):  
QM(df = 5) = 110.1070, p-val < .0001

Model Results:

|  | estimate | se | zval | pval | ci.lb | ci.ub |
|--|----------|----|------|------|-------|-------|
|--|----------|----|------|------|-------|-------|

|                 |          |         |         |        |           |          |     |
|-----------------|----------|---------|---------|--------|-----------|----------|-----|
| intrcpt         | -93.8624 | 35.5015 | -2.6439 | 0.0082 | -163.4441 | -24.2807 | **  |
| FU              | 0.0173   | 0.0148  | 1.1721  | 0.2412 | -0.0117   | 0.0463   |     |
| Year            | 0.0468   | 0.0179  | 2.6107  | 0.0090 | 0.0117    | 0.0820   | **  |
| Proportion_Male | 0.0331   | 0.5195  | 0.0637  | 0.9492 | -0.9850   | 1.0512   |     |
| Mean_Age        | -0.0521  | 0.0249  | -2.0894 | 0.0367 | -0.1009   | -0.0032  | *   |
| Complete        | 3.5270   | 0.3595  | 9.8098  | <.0001 | 2.8223    | 4.2317   | *** |

---

Signif. codes: 0 '\*\*\*' 0.001 '\*\*' 0.01 '\*' 0.05 '.' 0.1 ' ' 1

[1] "ContingencyManagement"

[1] 0

Mixed-Effects Model (k = 62; tau^2 estimator: REML)

tau^2 (estimated amount of residual heterogeneity): 0.6040 (SE = 0.2047)  
tau (square root of estimated tau^2 value): 0.7772  
I^2 (residual heterogeneity / unaccounted variability): 59.98%  
H^2 (unaccounted variability / sampling variability): 2.50  
R^2 (amount of heterogeneity accounted for): 35.17%

Test for Residual Heterogeneity:

QE(df = 56) = 134.9547, p-val < .0001

Test of Moderators (coefficient(s) 2,3,4,5,6):

QM(df = 5) = 24.4281, p-val = 0.0002

Model Results:

|                 | estimate | se      | zval    | pval   | ci.lb   | ci.ub    |    |
|-----------------|----------|---------|---------|--------|---------|----------|----|
| intrcpt         | 171.9289 | 71.3211 | 2.4106  | 0.0159 | 32.1421 | 311.7158 | *  |
| FU              | 0.0538   | 0.0230  | 2.3386  | 0.0194 | 0.0087  | 0.0989   | *  |
| Year            | -0.0864  | 0.0359  | -2.4102 | 0.0159 | -0.1567 | -0.0161  | *  |
| Proportion_Male | 0.6389   | 0.9249  | 0.6908  | 0.4897 | -1.1739 | 2.4517   |    |
| Mean_Age        | 0.0051   | 0.0439  | 0.1167  | 0.9071 | -0.0809 | 0.0912   |    |
| Complete        | 1.6922   | 0.6446  | 2.6249  | 0.0087 | 0.4287  | 2.9556   | ** |

---

Signif. codes: 0 '\*\*\*' 0.001 '\*\*' 0.01 '\*' 0.05 '.' 0.1 ' ' 1

[1] "Other"

[1] 0

Mixed-Effects Model (k = 18; tau^2 estimator: REML)

tau^2 (estimated amount of residual heterogeneity): 1.0731 (SE = 0.6586)  
tau (square root of estimated tau^2 value): 1.0359  
I^2 (residual heterogeneity / unaccounted variability): 80.40%  
H^2 (unaccounted variability / sampling variability): 5.10  
R^2 (amount of heterogeneity accounted for): 34.10%

Test for Residual Heterogeneity:  
QE(df = 12) = 33.7279, p-val = 0.0007

Test of Moderators (coefficient(s) 2,3,4,5,6):  
QM(df = 5) = 8.6743, p-val = 0.1228

Model Results:

|                 | estimate | se       | zval    | pval   | ci.lb     | ci.ub    |
|-----------------|----------|----------|---------|--------|-----------|----------|
| intrcpt         | 93.7221  | 323.5241 | 0.2897  | 0.7721 | -540.3735 | 727.8176 |
| FU              | 0.0467   | 0.0996   | 0.4694  | 0.6388 | -0.1485   | 0.2420   |
| Year            | -0.0442  | 0.1645   | -0.2685 | 0.7883 | -0.3667   | 0.2783   |
| Proportion_Male | -4.2648  | 2.7354   | -1.5591 | 0.1190 | -9.6261   | 1.0966   |
| Mean_Age        | -0.1248  | 0.1747   | -0.7146 | 0.4748 | -0.4672   | 0.2175   |
| Complete        | 4.2506   | 2.3611   | 1.8003  | 0.0718 | -0.3771   | 8.8783   |

---

Signif. codes: 0 '\*\*\*' 0.001 '\*\*' 0.01 '\*' 0.05 '.' 0.1 ' ' 1

[1] "Opioid"  
[1] 0

Mixed-Effects Model (k = 136; tau^2 estimator: REML)

tau^2 (estimated amount of residual heterogeneity): 0.9458 (SE = 0.1993)  
tau (square root of estimated tau^2 value): 0.9725  
I^2 (residual heterogeneity / unaccounted variability): 63.92%  
H^2 (unaccounted variability / sampling variability): 2.77  
R^2 (amount of heterogeneity accounted for): 0.81%

Test for Residual Heterogeneity:  
QE(df = 130) = 339.7699, p-val < .0001

Test of Moderators (coefficient(s) 2,3,4,5,6):  
QM(df = 5) = 5.9468, p-val = 0.3114

Model Results:

|                 | estimate | se      | zval    | pval   | ci.lb     | ci.ub   |
|-----------------|----------|---------|---------|--------|-----------|---------|
| intrcpt         | -27.3325 | 47.3302 | -0.5775 | 0.5636 | -120.0981 | 65.4330 |
| FU              | -0.0182  | 0.0160  | -1.1410 | 0.2539 | -0.0495   | 0.0131  |
| Year            | 0.0147   | 0.0239  | 0.6155  | 0.5382 | -0.0321   | 0.0615  |
| Proportion_Male | 0.5005   | 0.6413  | 0.7804  | 0.4352 | -0.7565   | 1.7574  |
| Mean_Age        | -0.0446  | 0.0392  | -1.1358 | 0.2560 | -0.1215   | 0.0323  |
| Complete        | 0.8222   | 0.7258  | 1.1328  | 0.2573 | -0.6004   | 2.2447  |

---

Signif. codes: 0 '\*\*\*' 0.001 '\*\*' 0.01 '\*' 0.05 '.' 0.1 ' ' 1

[1] "MiscMeds"  
[1] 0

Mixed-Effects Model (k = 37; tau^2 estimator: REML)

tau^2 (estimated amount of residual heterogeneity): 1.0429 (SE = 0.4521)  
tau (square root of estimated tau^2 value): 1.0212  
I^2 (residual heterogeneity / unaccounted variability): 68.96%  
H^2 (unaccounted variability / sampling variability): 3.22  
R^2 (amount of heterogeneity accounted for): 0.00%

Test for Residual Heterogeneity:

QE(df = 31) = 78.6164, p-val < .0001

Test of Moderators (coefficient(s) 2,3,4,5,6):

QM(df = 5) = 5.6360, p-val = 0.3433

Model Results:

|                 | estimate  | se       | zval    | pval   | ci.lb     | ci.ub    |
|-----------------|-----------|----------|---------|--------|-----------|----------|
| intrcpt         | -133.5635 | 124.7241 | -1.0709 | 0.2842 | -378.0182 | 110.8913 |
| FU              | -0.0270   | 0.0890   | -0.3031 | 0.7618 | -0.2015   | 0.1475   |
| Year            | 0.0689    | 0.0630   | 1.0947  | 0.2736 | -0.0545   | 0.1923   |
| Proportion_Male | -2.8305   | 1.9968   | -1.4175 | 0.1563 | -6.7442   | 1.0832   |
| Mean_Age        | -0.0602   | 0.0710   | -0.8471 | 0.3969 | -0.1994   | 0.0791   |
| Complete        | 0.7056    | 1.2845   | 0.5493  | 0.5828 | -1.8119   | 3.2232   |

---

Signif. codes: 0 '\*\*\*' 0.001 '\*\*' 0.01 '\*' 0.05 '.' 0.1 ' ' 1

[1] "Psychostimulants"

[1] 0

Mixed-Effects Model (k = 19; tau^2 estimator: REML)

tau^2 (estimated amount of residual heterogeneity): 0.2349 (SE = 0.2926)  
tau (square root of estimated tau^2 value): 0.4847  
I^2 (residual heterogeneity / unaccounted variability): 31.36%  
H^2 (unaccounted variability / sampling variability): 1.46  
R^2 (amount of heterogeneity accounted for): 83.31%

Test for Residual Heterogeneity:

QE(df = 13) = 23.3007, p-val = 0.0382

Test of Moderators (coefficient(s) 2,3,4,5,6):

QM(df = 5) = 24.8851, p-val = 0.0001

Model Results:

|                 | estimate  | se       | zval    | pval   | ci.lb     | ci.ub   |
|-----------------|-----------|----------|---------|--------|-----------|---------|
| intrcpt         | -138.9877 | 112.7082 | -1.2332 | 0.2175 | -359.8916 | 81.9162 |
| FU              | -0.0531   | 0.0420   | -1.2633 | 0.2065 | -0.1354   | 0.0293  |
| Year            | 0.0714    | 0.0573   | 1.2447  | 0.2133 | -0.0410   | 0.1837  |
| Proportion_Male | -4.5710   | 3.1437   | -1.4540 | 0.1459 | -10.7325  | 1.5906  |



|          |         |        |         |        |         |          |
|----------|---------|--------|---------|--------|---------|----------|
| Mean_Age | -0.0426 | 0.0590 | -0.7220 | 0.4703 | -0.1583 | 0.0731   |
| Complete | 3.4549  | 1.5874 | 2.1764  | 0.0295 | 0.3436  | 6.5662 * |

---

Signif. codes: 0 '\*\*\*' 0.001 '\*\*' 0.01 '\*' 0.05 '.' 0.1 ' ' 1

[1] "Anticonvulsants"

[1] 0

Mixed-Effects Model (k = 17; tau^2 estimator: REML)

tau^2 (estimated amount of residual heterogeneity): 0.1374 (SE = 0.3008)  
 tau (square root of estimated tau^2 value): 0.3707  
 I^2 (residual heterogeneity / unaccounted variability): 18.75%  
 H^2 (unaccounted variability / sampling variability): 1.23  
 R^2 (amount of heterogeneity accounted for): 92.71%

Test for Residual Heterogeneity:

QE(df = 11) = 10.8030, p-val = 0.4599

Test of Moderators (coefficient(s) 2,3,4,5,6):

QM(df = 5) = 42.7143, p-val < .0001

Model Results:

|                 | estimate  | se      | zval    | pval   | ci.lb     | ci.ub     |     |
|-----------------|-----------|---------|---------|--------|-----------|-----------|-----|
| intrcpt         | -450.2186 | 93.9553 | -4.7918 | <.0001 | -634.3675 | -266.0696 | *** |
| FU              | -0.1105   | 0.1346  | -0.8213 | 0.4115 | -0.3743   | 0.1532    |     |
| Year            | 0.2263    | 0.0475  | 4.7680  | <.0001 | 0.1333    | 0.3193    | *** |
| Proportion_Male | 2.2222    | 2.4267  | 0.9157  | 0.3598 | -2.5340   | 6.9783    |     |
| Mean_Age        | -0.1005   | 0.0682  | -1.4738 | 0.1405 | -0.2342   | 0.0332    |     |
| Complete        | 0.3519    | 1.0986  | 0.3203  | 0.7487 | -1.8013   | 2.5052    |     |

---

Signif. codes: 0 '\*\*\*' 0.001 '\*\*' 0.01 '\*' 0.05 '.' 0.1 ' ' 1

[1] "DopamineAgonists"

[1] 0

Mixed-Effects Model (k = 18; tau^2 estimator: REML)

tau^2 (estimated amount of residual heterogeneity): 0.0022 (SE = 0.1692)  
 tau (square root of estimated tau^2 value): 0.0470  
 I^2 (residual heterogeneity / unaccounted variability): 0.46%  
 H^2 (unaccounted variability / sampling variability): 1.00  
 R^2 (amount of heterogeneity accounted for): 99.39%

Test for Residual Heterogeneity:

QE(df = 12) = 13.3007, p-val = 0.3476

Test of Moderators (coefficient(s) 2,3,4,5,6):

QM(df = 5) = 18.8892, p-val = 0.0020

Model Results:

|                 | estimate  | se      | zval    | pval   | ci.lb     | ci.ub    |    |
|-----------------|-----------|---------|---------|--------|-----------|----------|----|
| intrcpt         | -211.1726 | 85.1506 | -2.4800 | 0.0131 | -378.0647 | -44.2805 | *  |
| FU              | 0.0491    | 0.0797  | 0.6164  | 0.5376 | -0.1070   | 0.2052   |    |
| Year            | 0.1063    | 0.0430  | 2.4747  | 0.0133 | 0.0221    | 0.1905   | *  |
| Proportion_Male | -4.0561   | 1.9347  | -2.0965 | 0.0360 | -7.8480   | -0.2642  | *  |
| Mean_Age        | -0.0587   | 0.0454  | -1.2945 | 0.1955 | -0.1476   | 0.0302   |    |
| Complete        | 5.8243    | 2.0009  | 2.9108  | 0.0036 | 1.9026    | 9.7461   | ** |

---

Signif. codes: 0 '\*\*\*' 0.001 '\*\*' 0.01 '\*' 0.05 '.' 0.1 ' ' 1

[1] "Antidepressants"

[1] 0

Mixed-Effects Model (k = 15; tau^2 estimator: REML)

tau^2 (estimated amount of residual heterogeneity): 0.7642 (SE = 0.8718)  
tau (square root of estimated tau^2 value): 0.8742  
I^2 (residual heterogeneity / unaccounted variability): 41.66%  
H^2 (unaccounted variability / sampling variability): 1.71  
R^2 (amount of heterogeneity accounted for): 58.42%

Test for Residual Heterogeneity:

QE(df = 9) = 15.0497, p-val = 0.0896

Test of Moderators (coefficient(s) 2,3,4,5,6):

QM(df = 5) = 14.1740, p-val = 0.0145

Model Results:

|                 | estimate  | se       | zval    | pval   | ci.lb     | ci.ub    |   |
|-----------------|-----------|----------|---------|--------|-----------|----------|---|
| intrcpt         | -253.1938 | 193.7648 | -1.3067 | 0.1913 | -632.9658 | 126.5781 |   |
| FU              | -0.6719   | 0.3315   | -2.0268 | 0.0427 | -1.3217   | -0.0221  | * |
| Year            | 0.1345    | 0.1005   | 1.3381  | 0.1809 | -0.0625   | 0.3316   |   |
| Proportion_Male | 1.4309    | 1.3665   | 1.0471  | 0.2950 | -1.2474   | 4.1091   |   |
| Mean_Age        | -0.2401   | 0.3421   | -0.7016 | 0.4829 | -0.9106   | 0.4305   |   |
| Complete        | 3.3947    | 2.8201   | 1.2038  | 0.2287 | -2.1325   | 8.9219   |   |

---

Signif. codes: 0 '\*\*\*' 0.001 '\*\*' 0.01 '\*' 0.05 '.' 0.1 ' ' 1

[1] "Antipsychotics"

[1] 0

Mixed-Effects Model (k = 11; tau^2 estimator: REML)

tau^2 (estimated amount of residual heterogeneity): 0.0409 (SE = 0.4647)

tau (square root of estimated tau^2 value): 0.2022  
 I^2 (residual heterogeneity / unaccounted variability): 5.14%  
 H^2 (unaccounted variability / sampling variability): 1.05  
 R^2 (amount of heterogeneity accounted for): 89.77%

Test for Residual Heterogeneity:

QE(df = 5) = 5.4069, p-val = 0.3683

Test of Moderators (coefficient(s) 2,3,4,5,6):

QM(df = 5) = 9.9983, p-val = 0.0753

Model Results:

|                 | estimate  | se       | zval    | pval   | ci.lb     | ci.ub    |
|-----------------|-----------|----------|---------|--------|-----------|----------|
| intrcpt         | -201.4559 | 275.3147 | -0.7317 | 0.4643 | -741.0628 | 338.1510 |
| FU              | 0.0087    | 0.0381   | 0.2286  | 0.8192 | -0.0660   | 0.0834   |
| Year            | 0.0998    | 0.1399   | 0.7132  | 0.4758 | -0.1744   | 0.3740   |
| Proportion_Male | 3.9847    | 2.8952   | 1.3763  | 0.1687 | -1.6897   | 9.6591   |
| Mean_Age        | -0.0911   | 0.1947   | -0.4677 | 0.6400 | -0.4727   | 0.2905   |
| Complete        | 2.8446    | 2.1043   | 1.3518  | 0.1764 | -1.2797   | 6.9689   |

---

Signif. codes: 0 '\*\*\*' 0.001 '\*\*' 0.01 '\*' 0.05 '.' 0.1 ' ' 1

**eFigure 1. Forest Plot Without Imputed Data: Anticonvulsants**

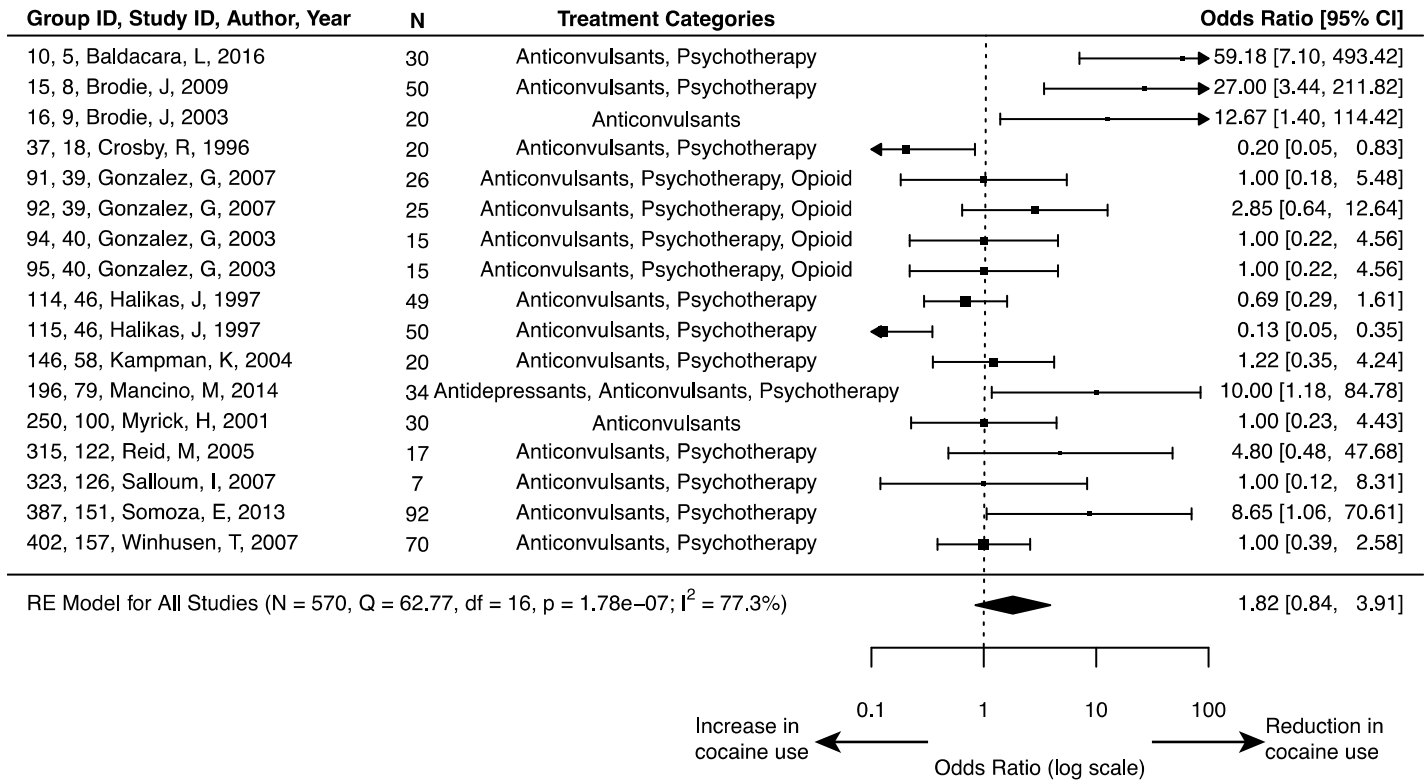

**eFigure 2.** Forest Plot Without Imputed Data: Antidepressants

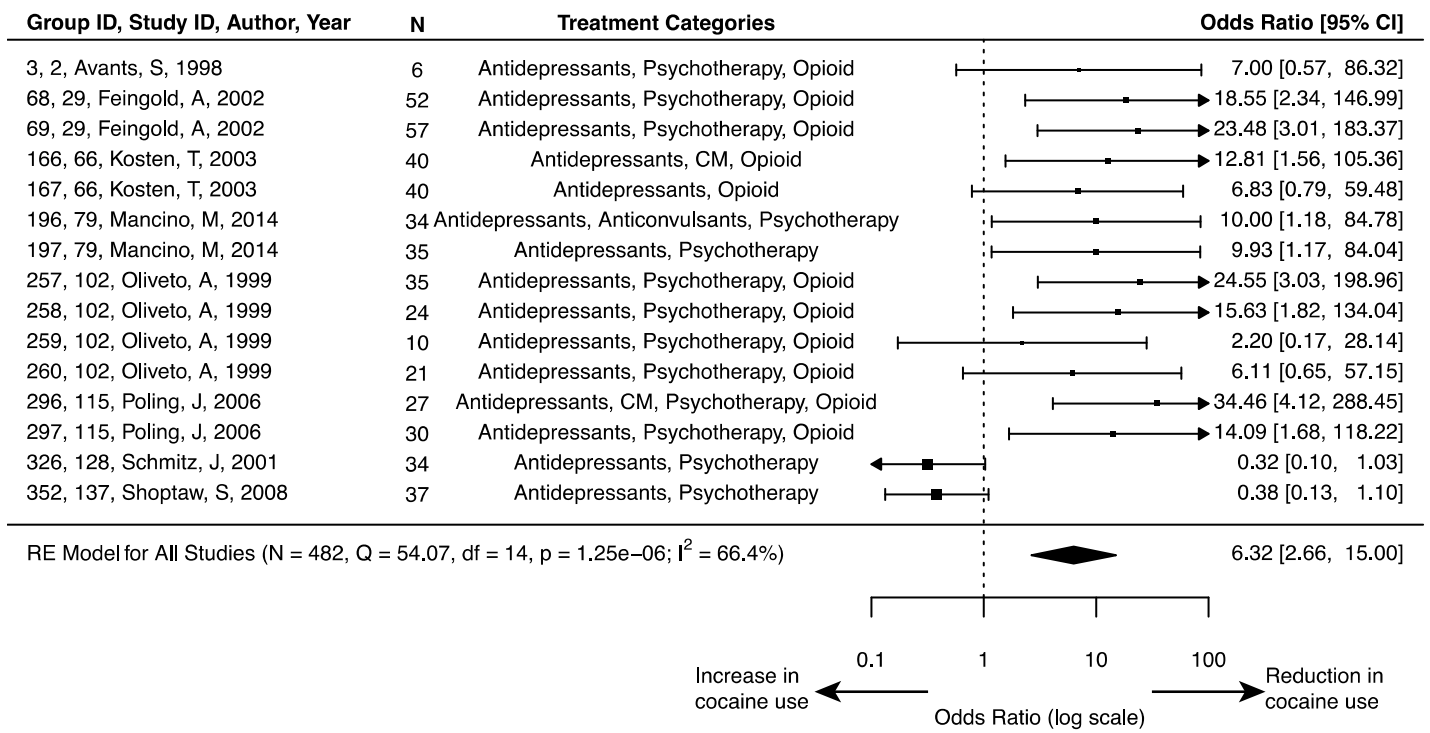

**eFigure 3. Forest Plot Without Imputed Data: Antipsychotics**

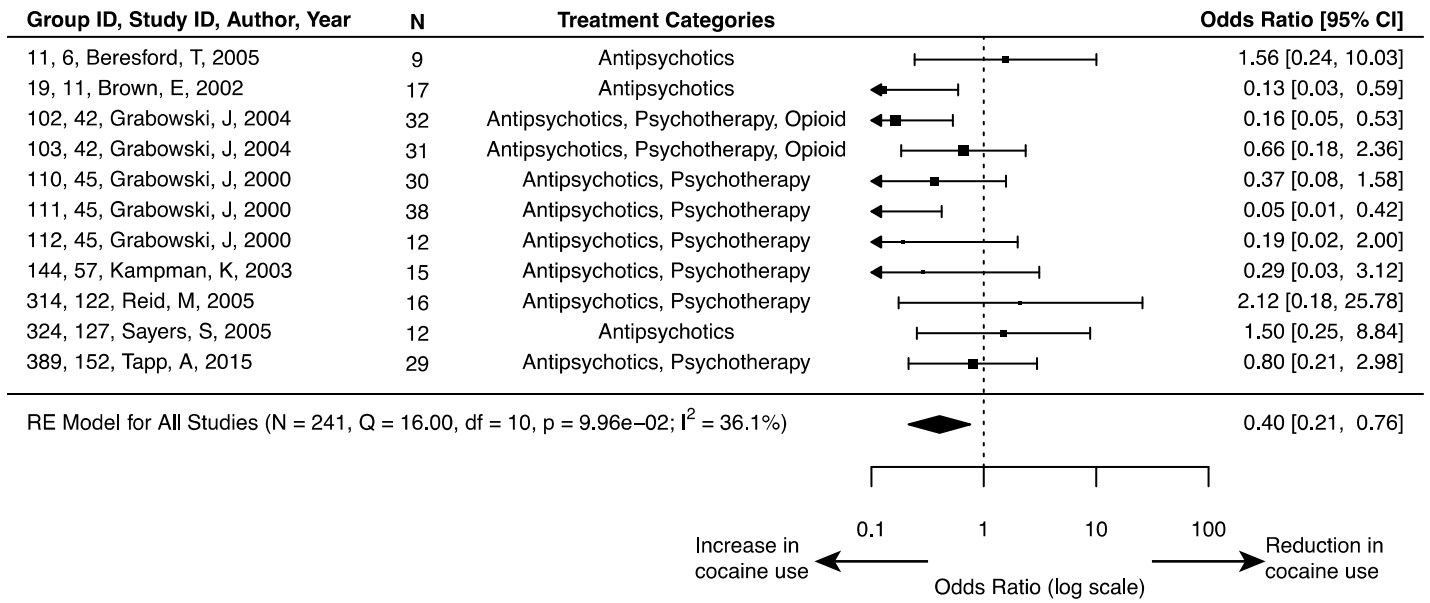

**eFigure 4. Forest Plot Without Imputed Data: Contingency Management**

(1 of 2)

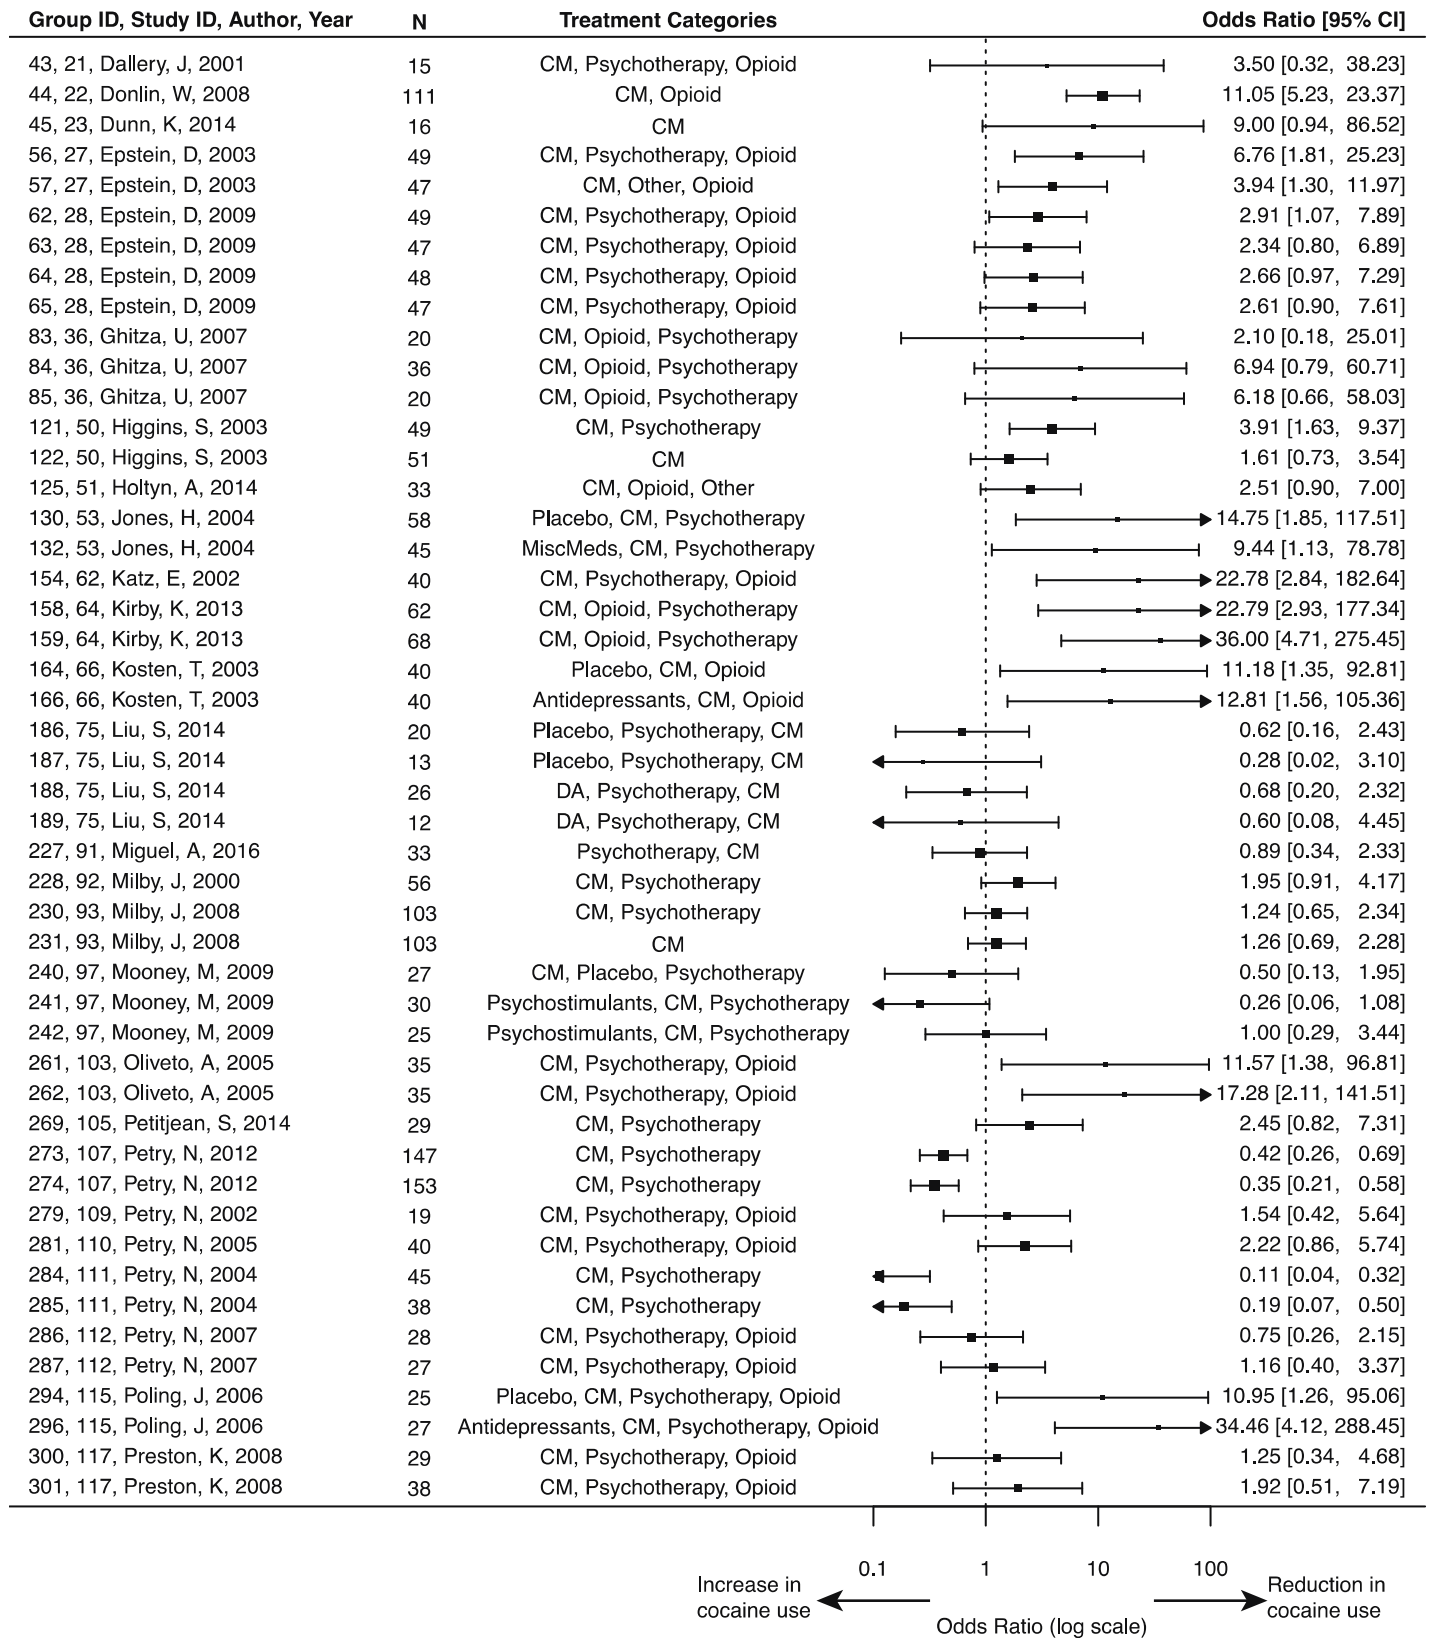

## Contingency Management (2 of 2)

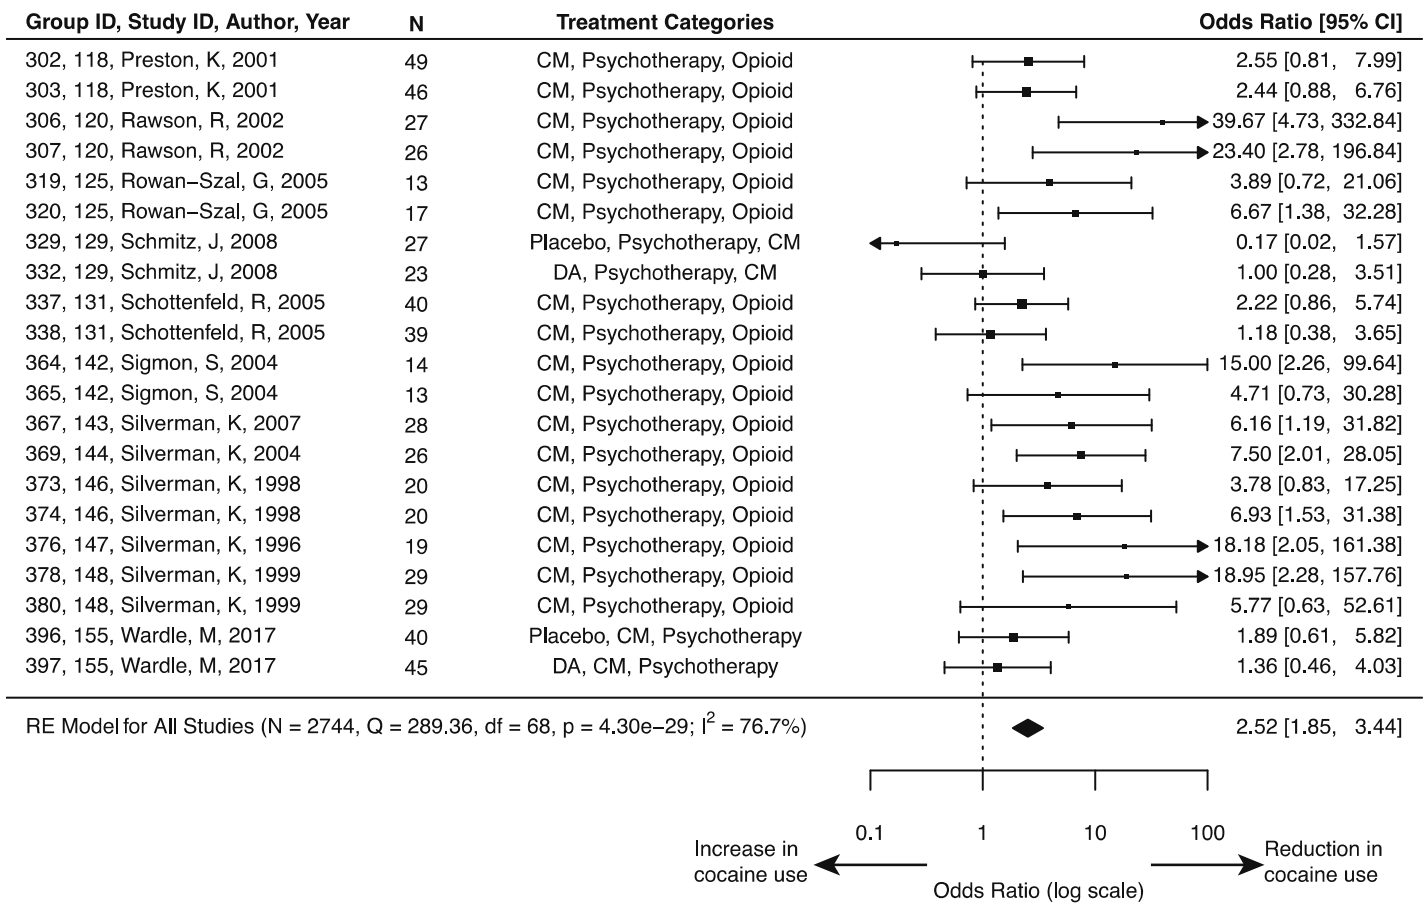



**eFigure 5.** Forest Plot Without Imputed Data: Dopamine Agonists

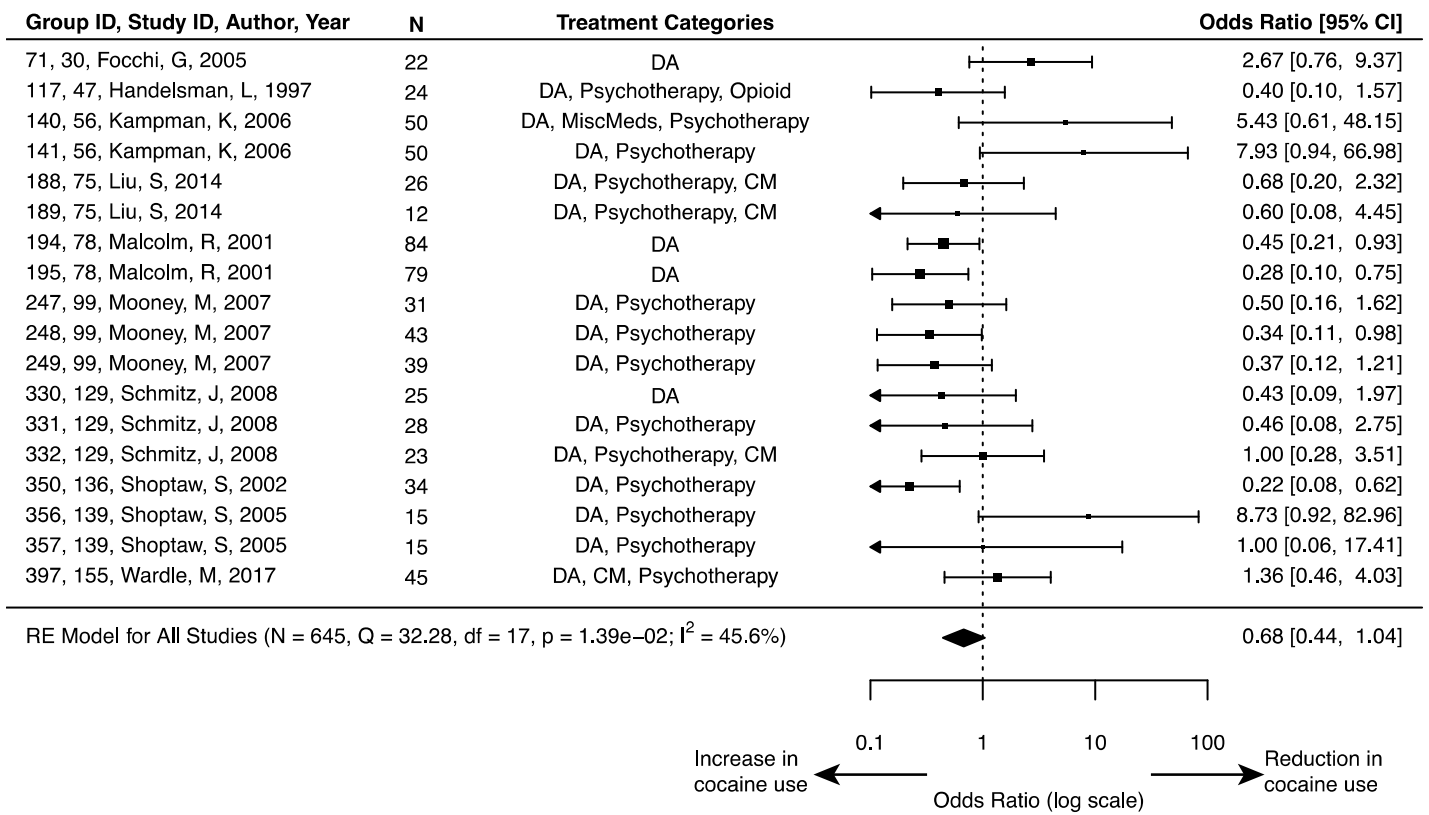

**eFigure 6. Forest Plot Without Imputed Data: Miscellaneous Medications**

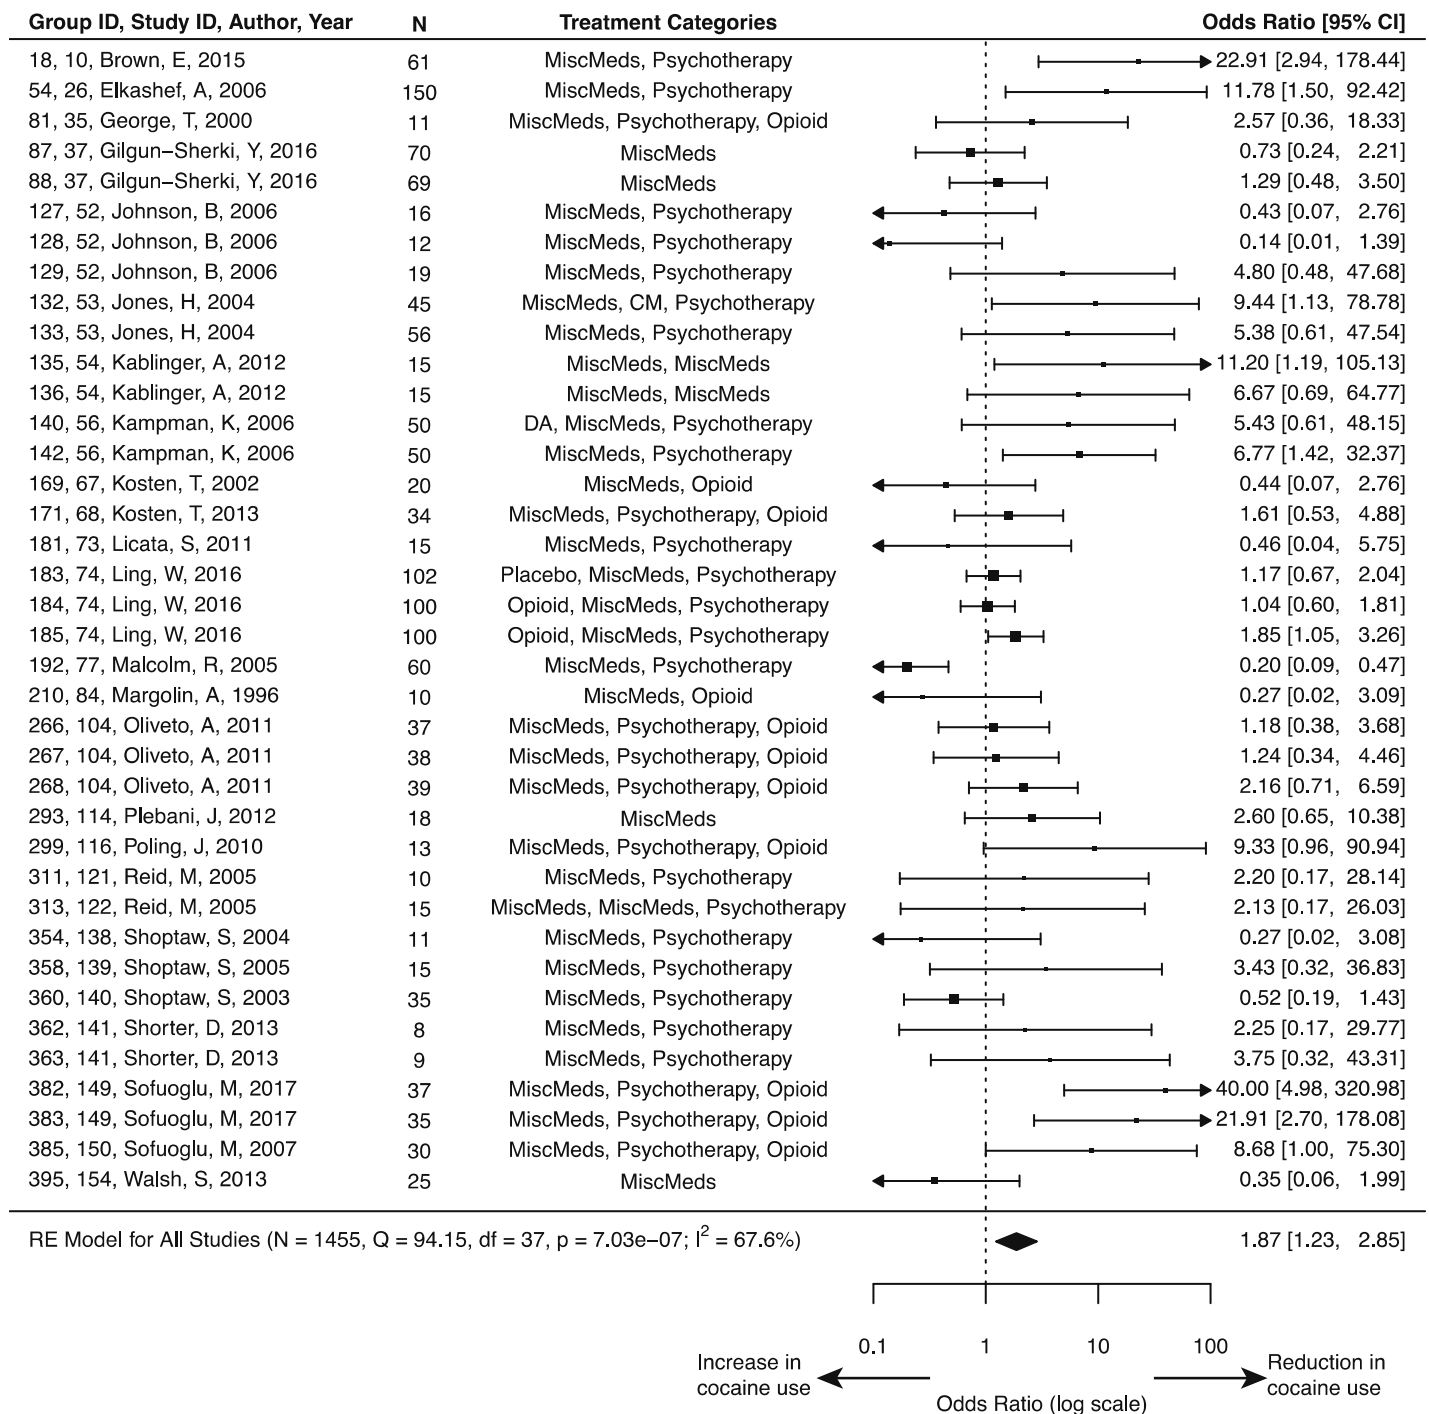

**eFigure 7. Forest Plot Without Imputed Data: Opioids**

(1 of 3)

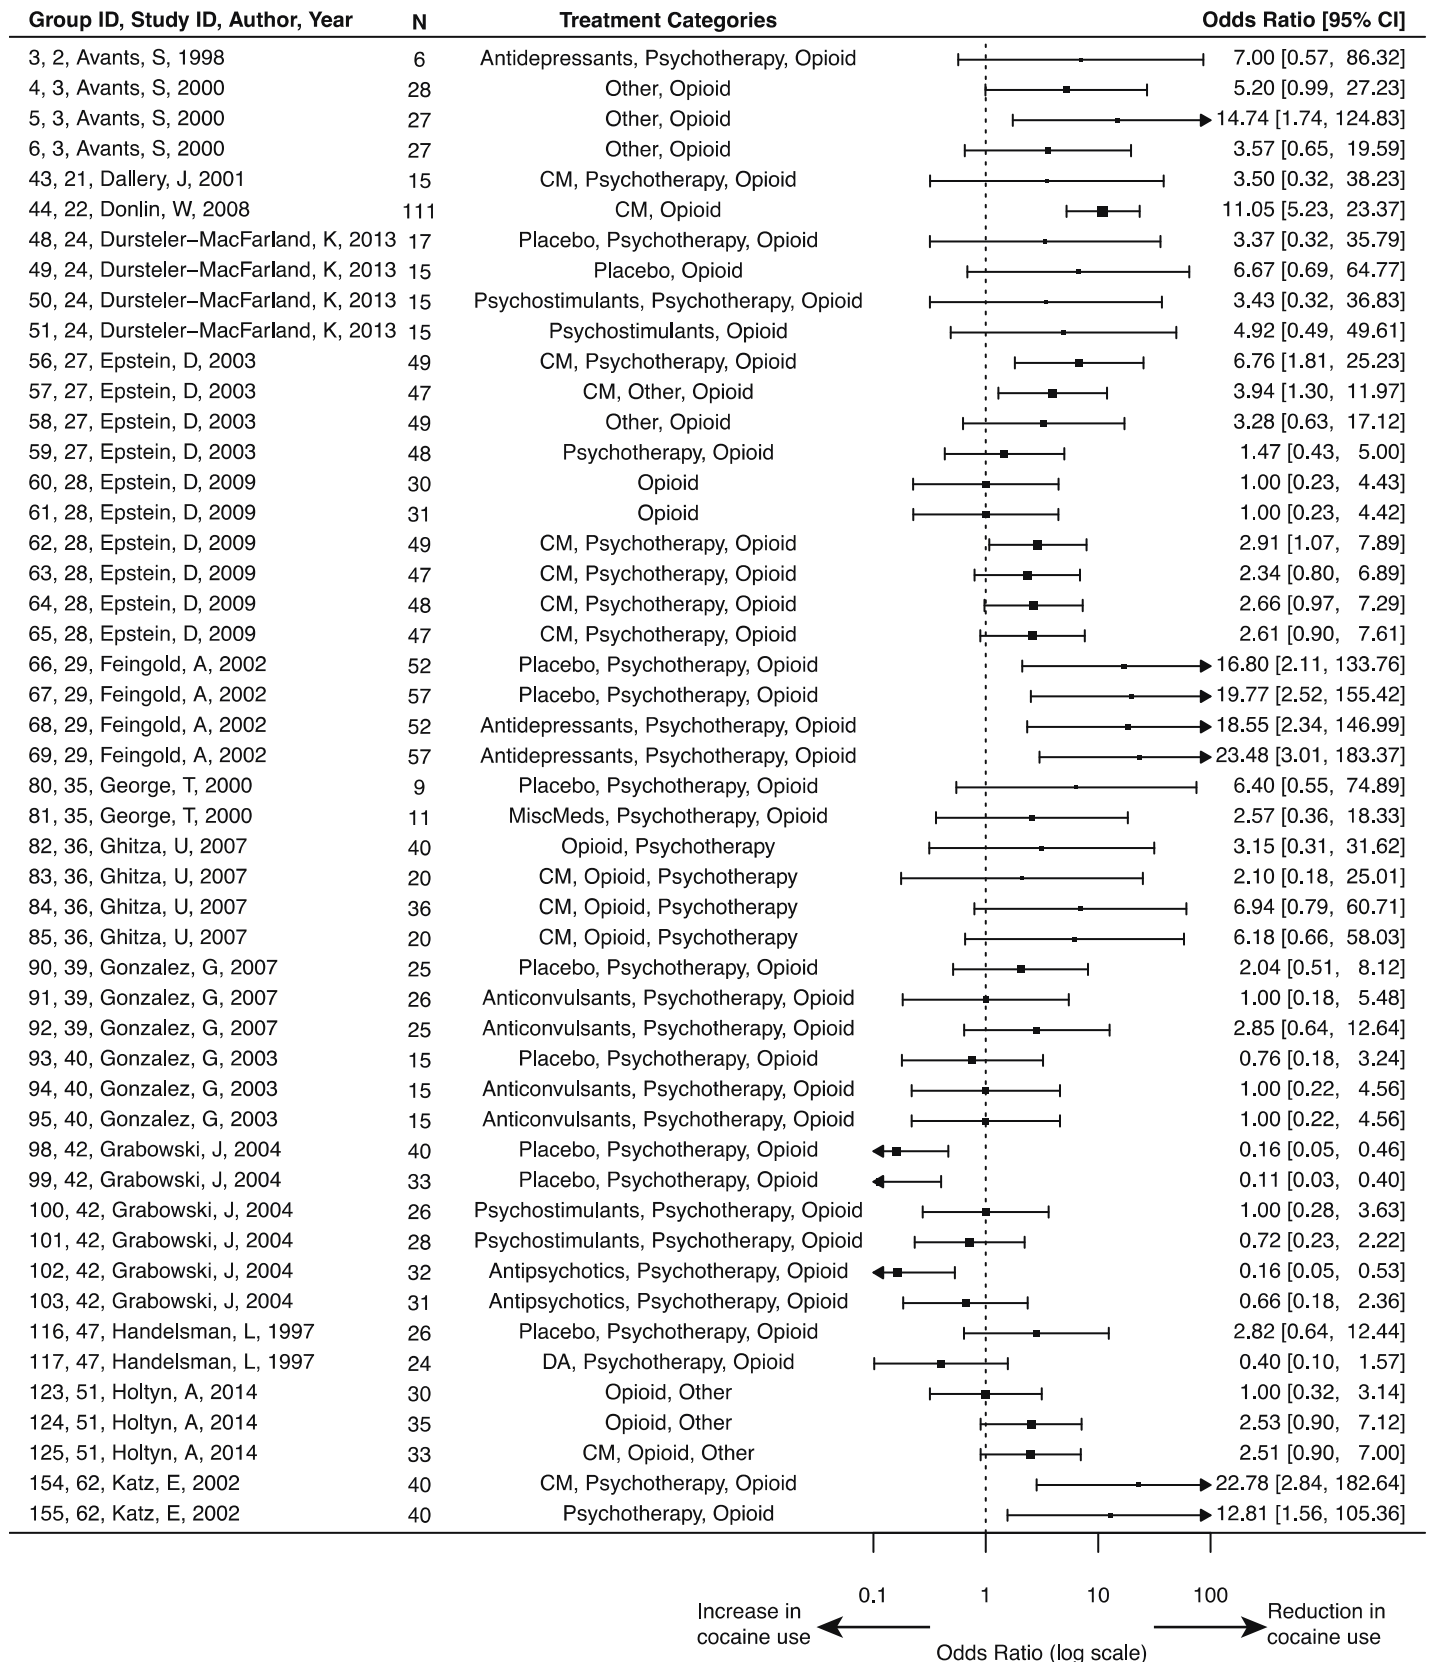

## Opioids (2 of 3)

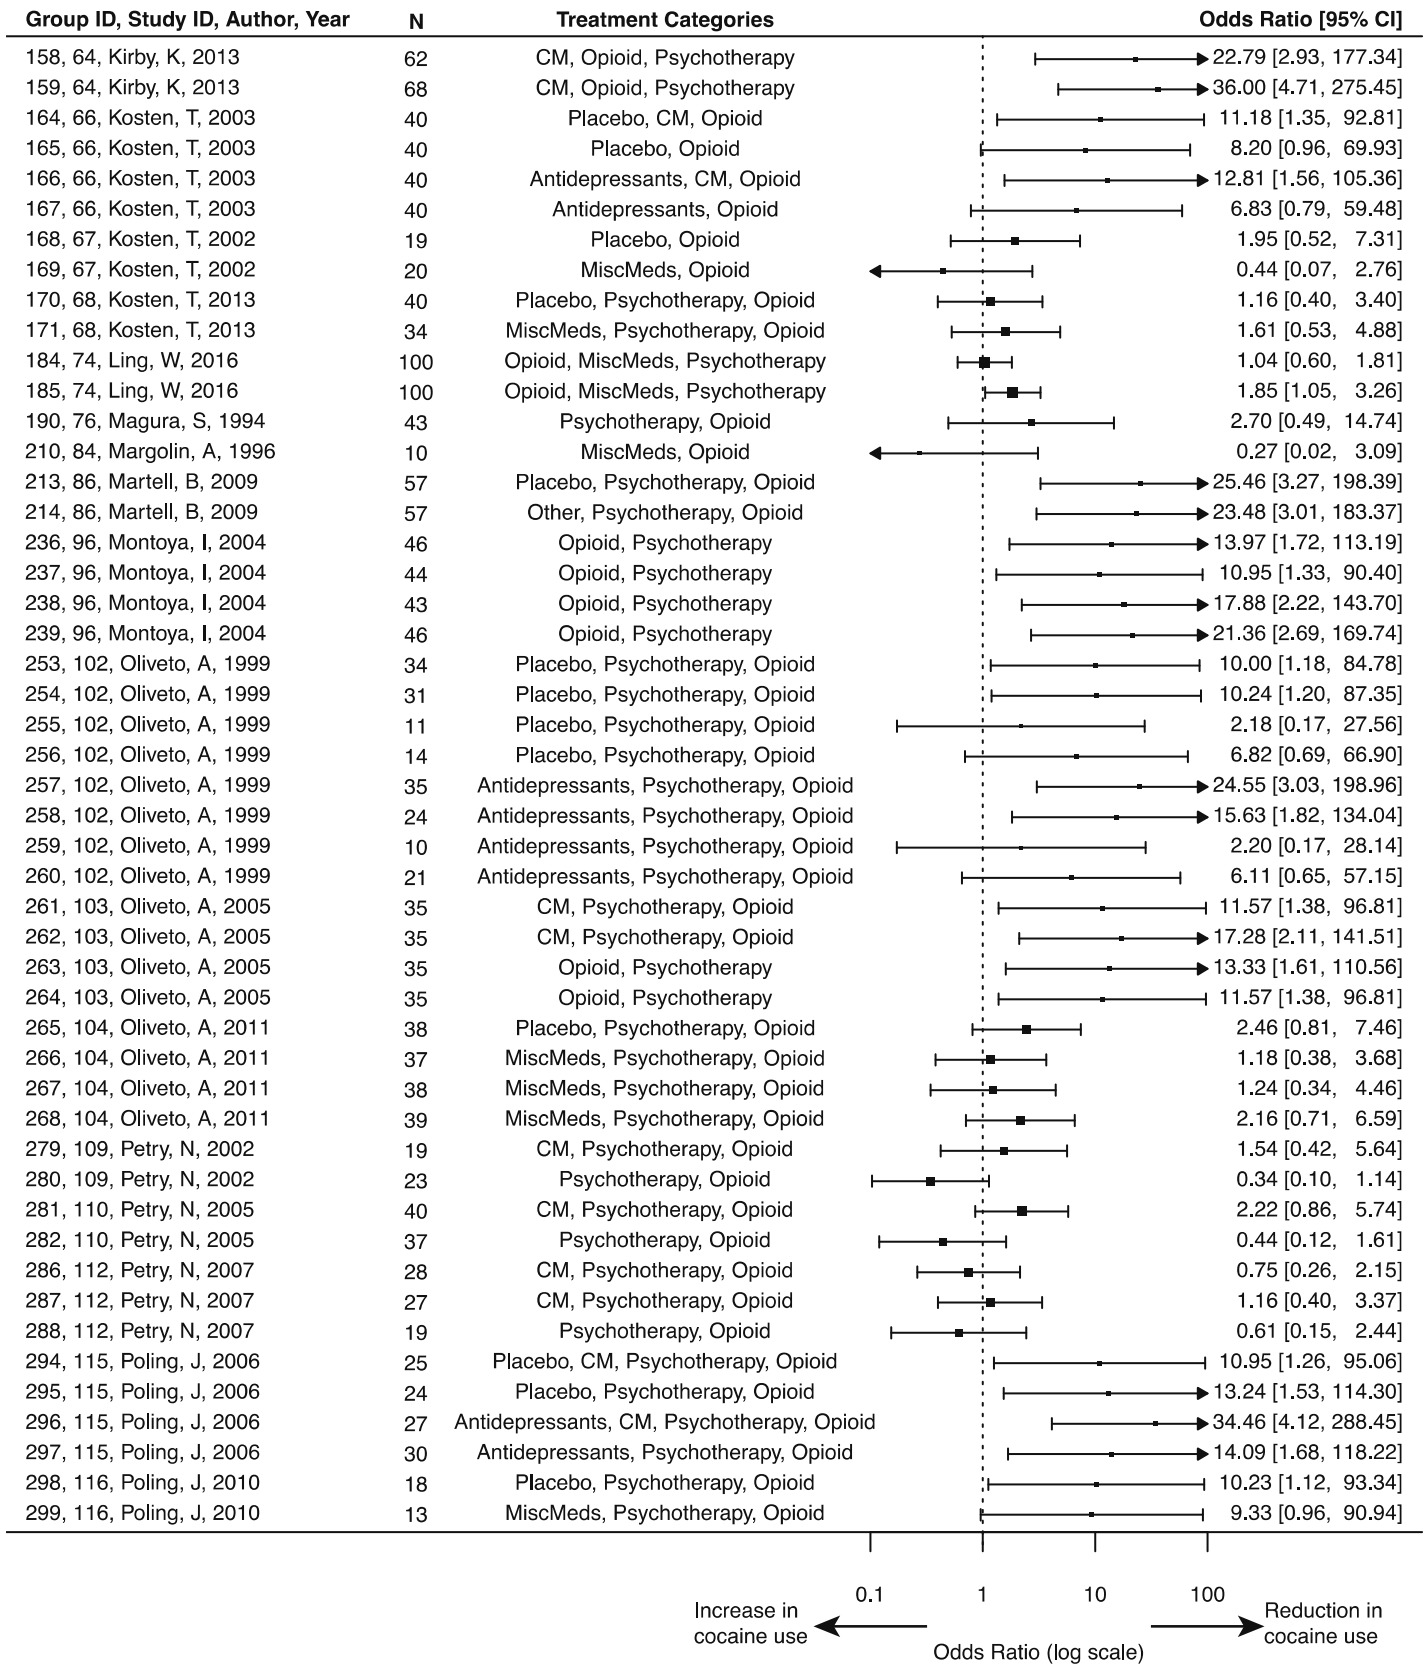

# Opioids (3 of 3)

| Group ID, Study ID, Author, Year | N   | Treatment Categories            | Odds Ratio [95% CI]  |
|----------------------------------|-----|---------------------------------|----------------------|
| 300, 117, Preston, K, 2008       | 29  | CM, Psychotherapy, Opioid       | 1.25 [0.34, 4.68]    |
| 301, 117, Preston, K, 2008       | 38  | CM, Psychotherapy, Opioid       | 1.92 [0.51, 7.19]    |
| 302, 118, Preston, K, 2001       | 49  | CM, Psychotherapy, Opioid       | 2.55 [0.81, 7.99]    |
| 303, 118, Preston, K, 2001       | 46  | CM, Psychotherapy, Opioid       | 2.44 [0.88, 6.76]    |
| 306, 120, Rawson, R, 2002        | 27  | CM, Psychotherapy, Opioid       | 39.67 [4.73, 332.84] |
| 307, 120, Rawson, R, 2002        | 26  | CM, Psychotherapy, Opioid       | 23.40 [2.78, 196.84] |
| 308, 120, Rawson, R, 2002        | 28  | Psychotherapy, Opioid           | 19.33 [2.31, 161.57] |
| 309, 120, Rawson, R, 2002        | 27  | Psychotherapy, Opioid           | 8.91 [1.02, 77.91]   |
| 317, 124, Rosenblum, A, 1999     | 140 | Psychotherapy, Opioid           | 1.59 [0.96, 2.63]    |
| 318, 124, Rosenblum, A, 1999     | 58  | Psychotherapy, Opioid           | 1.36 [0.63, 2.93]    |
| 319, 125, Rowan-Szal, G, 2005    | 13  | CM, Psychotherapy, Opioid       | 3.89 [0.72, 21.06]   |
| 320, 125, Rowan-Szal, G, 2005    | 17  | CM, Psychotherapy, Opioid       | 6.67 [1.38, 32.28]   |
| 321, 125, Rowan-Szal, G, 2005    | 15  | Psychotherapy, Opioid           | 1.00 [0.20, 5.04]    |
| 322, 125, Rowan-Szal, G, 2005    | 16  | Psychotherapy, Opioid           | 4.33 [0.88, 21.30]   |
| 333, 130, Schottenfeld, R, 1997  | 28  | Opioid, Psychotherapy           | 1.18 [0.38, 3.71]    |
| 334, 130, Schottenfeld, R, 1997  | 29  | Opioid, Psychotherapy           | 0.54 [0.18, 1.62]    |
| 335, 130, Schottenfeld, R, 1997  | 30  | Opioid, Psychotherapy           | 0.50 [0.15, 1.62]    |
| 336, 130, Schottenfeld, R, 1997  | 29  | Opioid, Psychotherapy           | 0.16 [0.04, 0.67]    |
| 337, 131, Schottenfeld, R, 2005  | 40  | CM, Psychotherapy, Opioid       | 2.22 [0.86, 5.74]    |
| 338, 131, Schottenfeld, R, 2005  | 39  | CM, Psychotherapy, Opioid       | 1.18 [0.38, 3.65]    |
| 339, 131, Schottenfeld, R, 2005  | 40  | Opioid, Psychotherapy           | 2.73 [0.92, 8.13]    |
| 340, 131, Schottenfeld, R, 2005  | 43  | Opioid, Psychotherapy           | 1.36 [0.46, 4.06]    |
| 347, 135, Shearer, J, 2003       | 14  | Placebo, Opioid                 | 1.00 [0.16, 6.08]    |
| 348, 135, Shearer, J, 2003       | 16  | Psychostimulants, Opioid        | 11.67 [1.23, 110.95] |
| 364, 142, Sigmon, S, 2004        | 14  | CM, Psychotherapy, Opioid       | 15.00 [2.26, 99.64]  |
| 365, 142, Sigmon, S, 2004        | 13  | CM, Psychotherapy, Opioid       | 4.71 [0.73, 30.28]   |
| 366, 142, Sigmon, S, 2004        | 15  | Psychotherapy, Opioid           | 4.57 [0.90, 23.14]   |
| 367, 143, Silverman, K, 2007     | 28  | CM, Psychotherapy, Opioid       | 6.16 [1.19, 31.82]   |
| 368, 143, Silverman, K, 2007     | 28  | Psychotherapy, Opioid           | 2.17 [0.36, 12.92]   |
| 369, 144, Silverman, K, 2004     | 26  | CM, Psychotherapy, Opioid       | 7.50 [2.01, 28.05]   |
| 370, 144, Silverman, K, 2004     | 26  | Psychotherapy, Opioid           | 4.55 [0.47, 43.78]   |
| 373, 146, Silverman, K, 1998     | 20  | CM, Psychotherapy, Opioid       | 3.78 [0.83, 17.25]   |
| 374, 146, Silverman, K, 1998     | 20  | CM, Psychotherapy, Opioid       | 6.93 [1.53, 31.38]   |
| 375, 146, Silverman, K, 1998     | 19  | Psychotherapy, Opioid           | 2.27 [0.36, 14.19]   |
| 376, 147, Silverman, K, 1996     | 19  | CM, Psychotherapy, Opioid       | 18.18 [2.05, 161.38] |
| 377, 147, Silverman, K, 1996     | 18  | Psychotherapy, Opioid           | 2.12 [0.18, 25.78]   |
| 378, 148, Silverman, K, 1999     | 29  | CM, Psychotherapy, Opioid       | 18.95 [2.28, 157.76] |
| 379, 148, Silverman, K, 1999     | 29  | Psychotherapy, Opioid           | 2.07 [0.18, 24.07]   |
| 380, 148, Silverman, K, 1999     | 29  | CM, Psychotherapy, Opioid       | 5.77 [0.63, 52.61]   |
| 381, 149, Sofuoglu, M, 2017      | 34  | Placebo, Psychotherapy, Opioid  | 17.50 [2.13, 143.64] |
| 382, 149, Sofuoglu, M, 2017      | 37  | MiscMeds, Psychotherapy, Opioid | 40.00 [4.98, 320.98] |
| 383, 149, Sofuoglu, M, 2017      | 35  | MiscMeds, Psychotherapy, Opioid | 21.91 [2.70, 178.08] |
| 384, 150, Sofuoglu, M, 2007      | 15  | Placebo, Psychotherapy, Opioid  | 8.73 [0.92, 82.96]   |
| 385, 150, Sofuoglu, M, 2007      | 30  | MiscMeds, Psychotherapy, Opioid | 8.68 [1.00, 75.30]   |

RE Model for All Studies (N = 4686, Q = 369.32, df = 141, p = 2.31e-22; I<sup>2</sup> = 65.2%) 3.05 [2.46, 3.78]

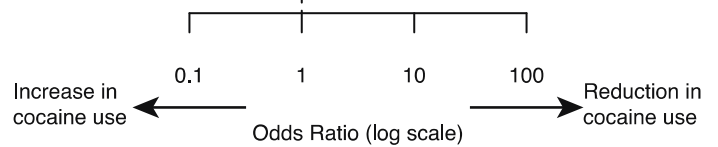

**eFigure 8.** Forest Plot Without Imputed Data: Other Interventions

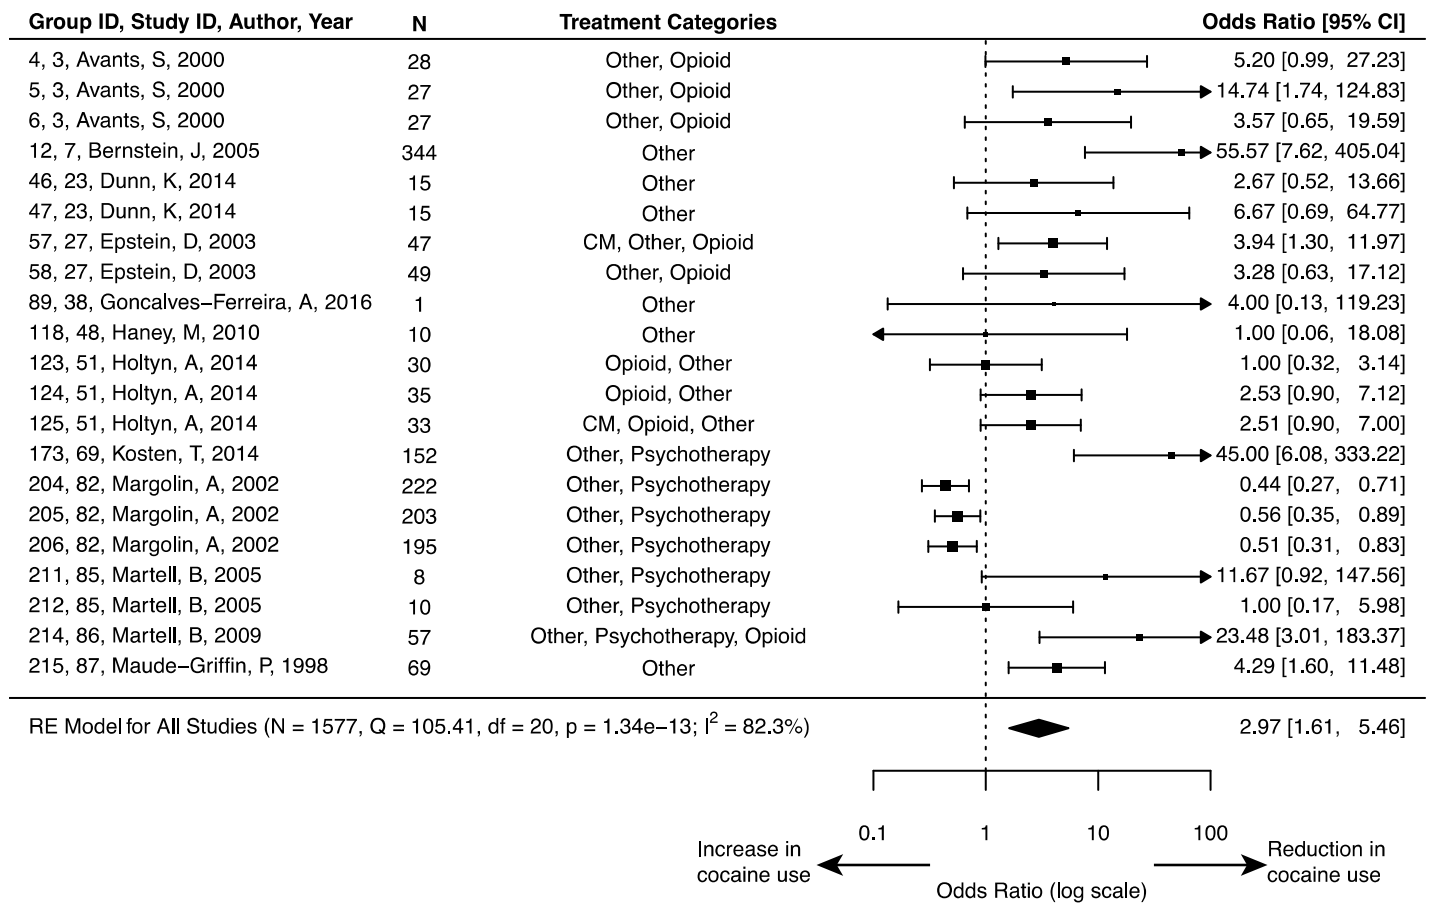

**eFigure 9.** Forest Plot Without Imputed Data: Placebo

(1 of 2)

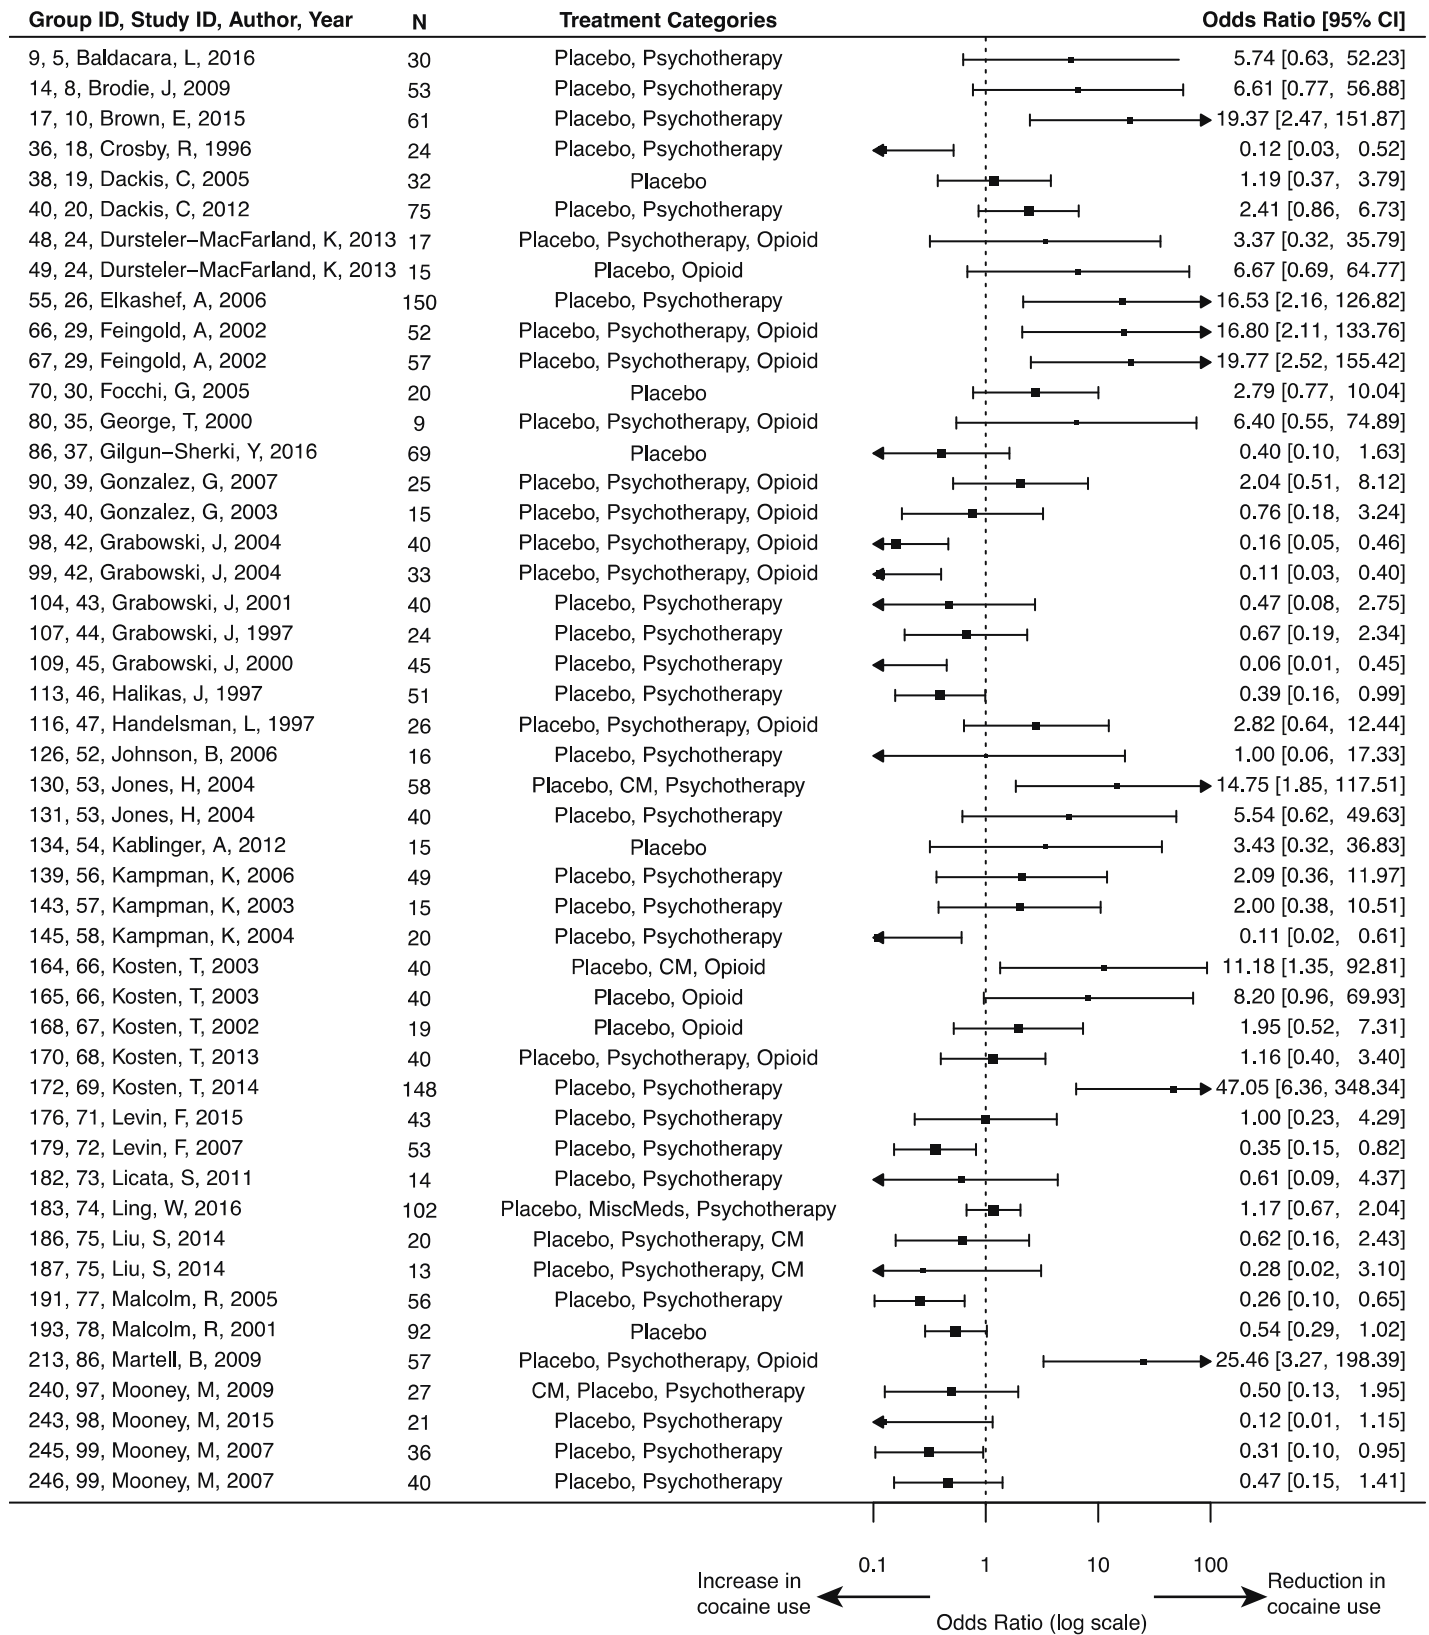

## Placebo (2 of 2)

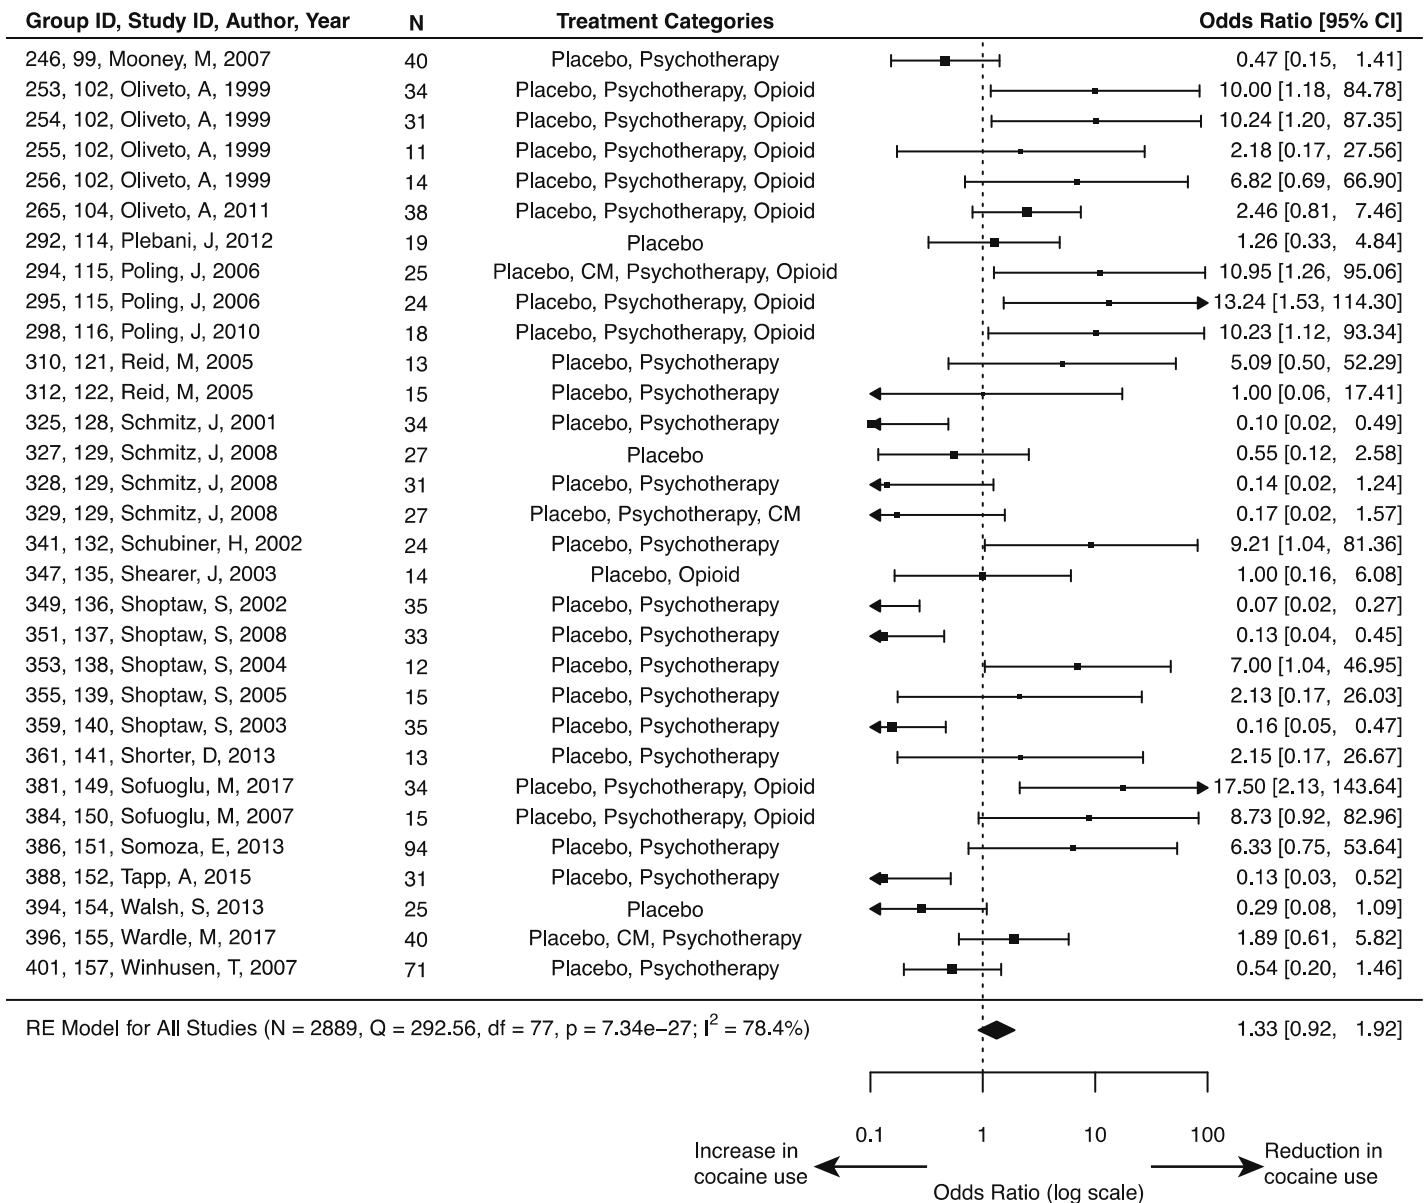



**eFigure 10.** Forest Plot Without Imputed Data: Psychostimulants

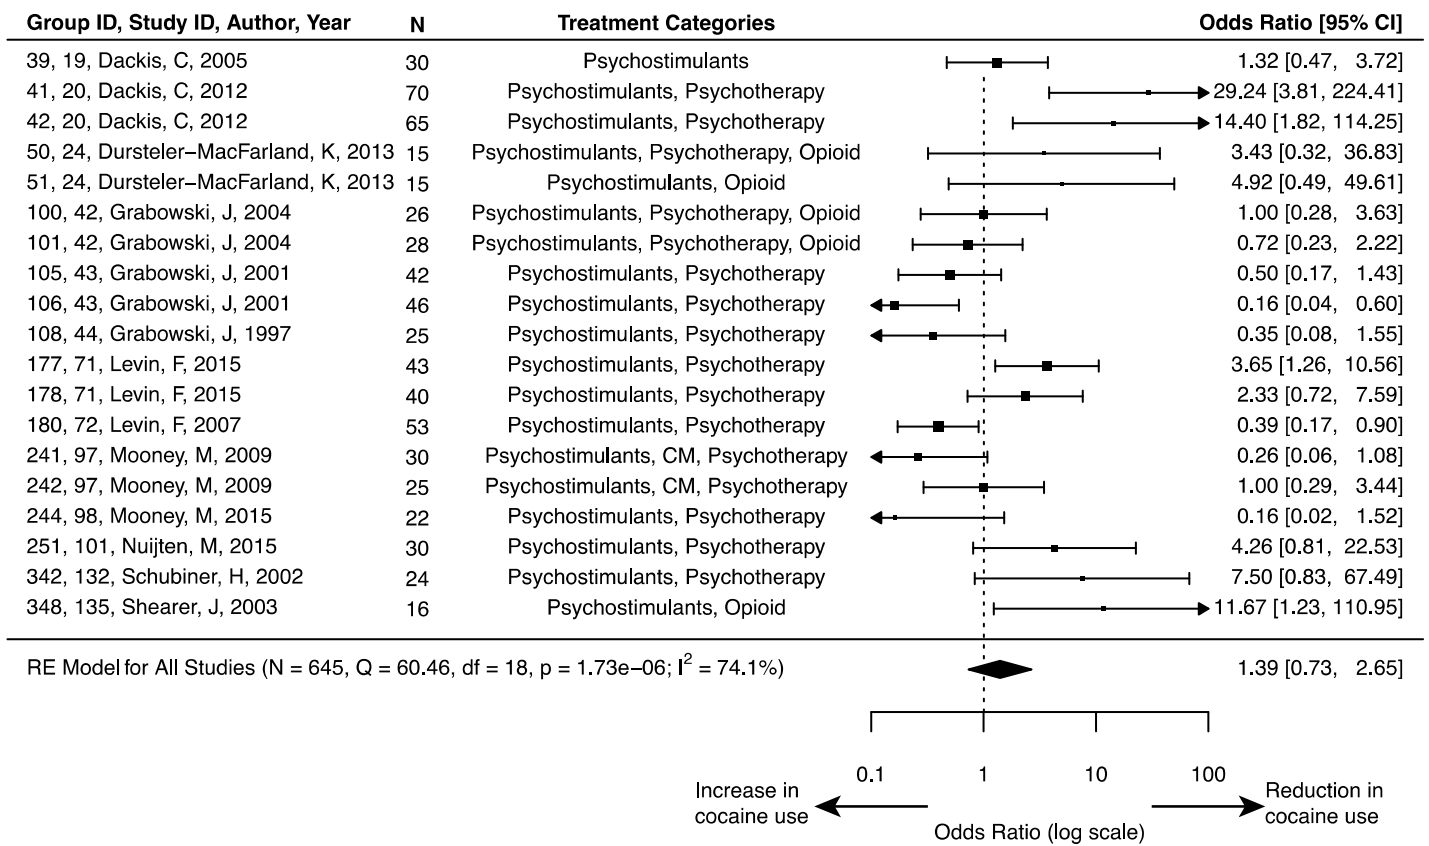

**eFigure 11. Forest Plot Without Imputed Data: Psychotherapy**

(1 of 6)

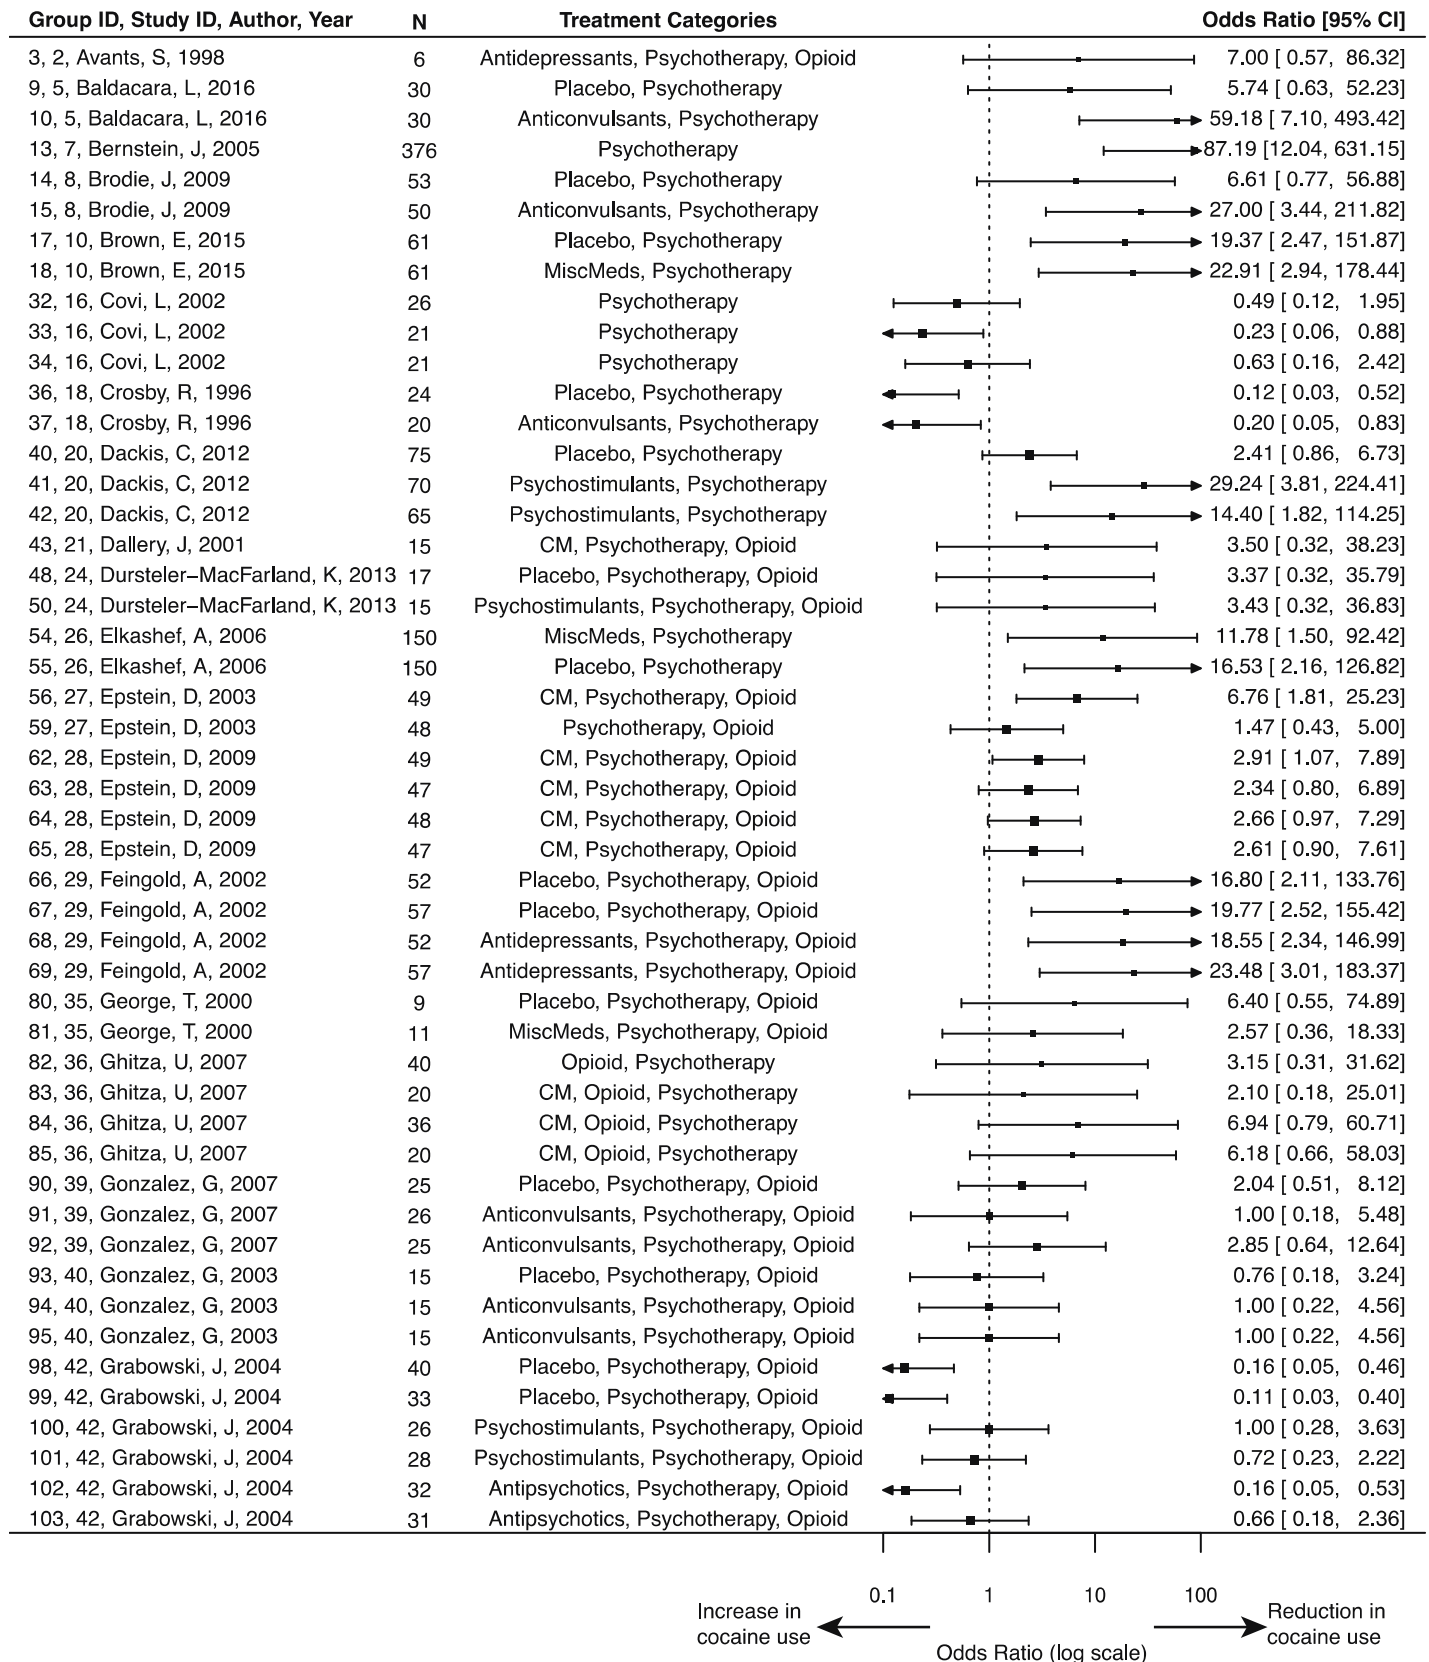

## Psychotherapy (2 of 6)

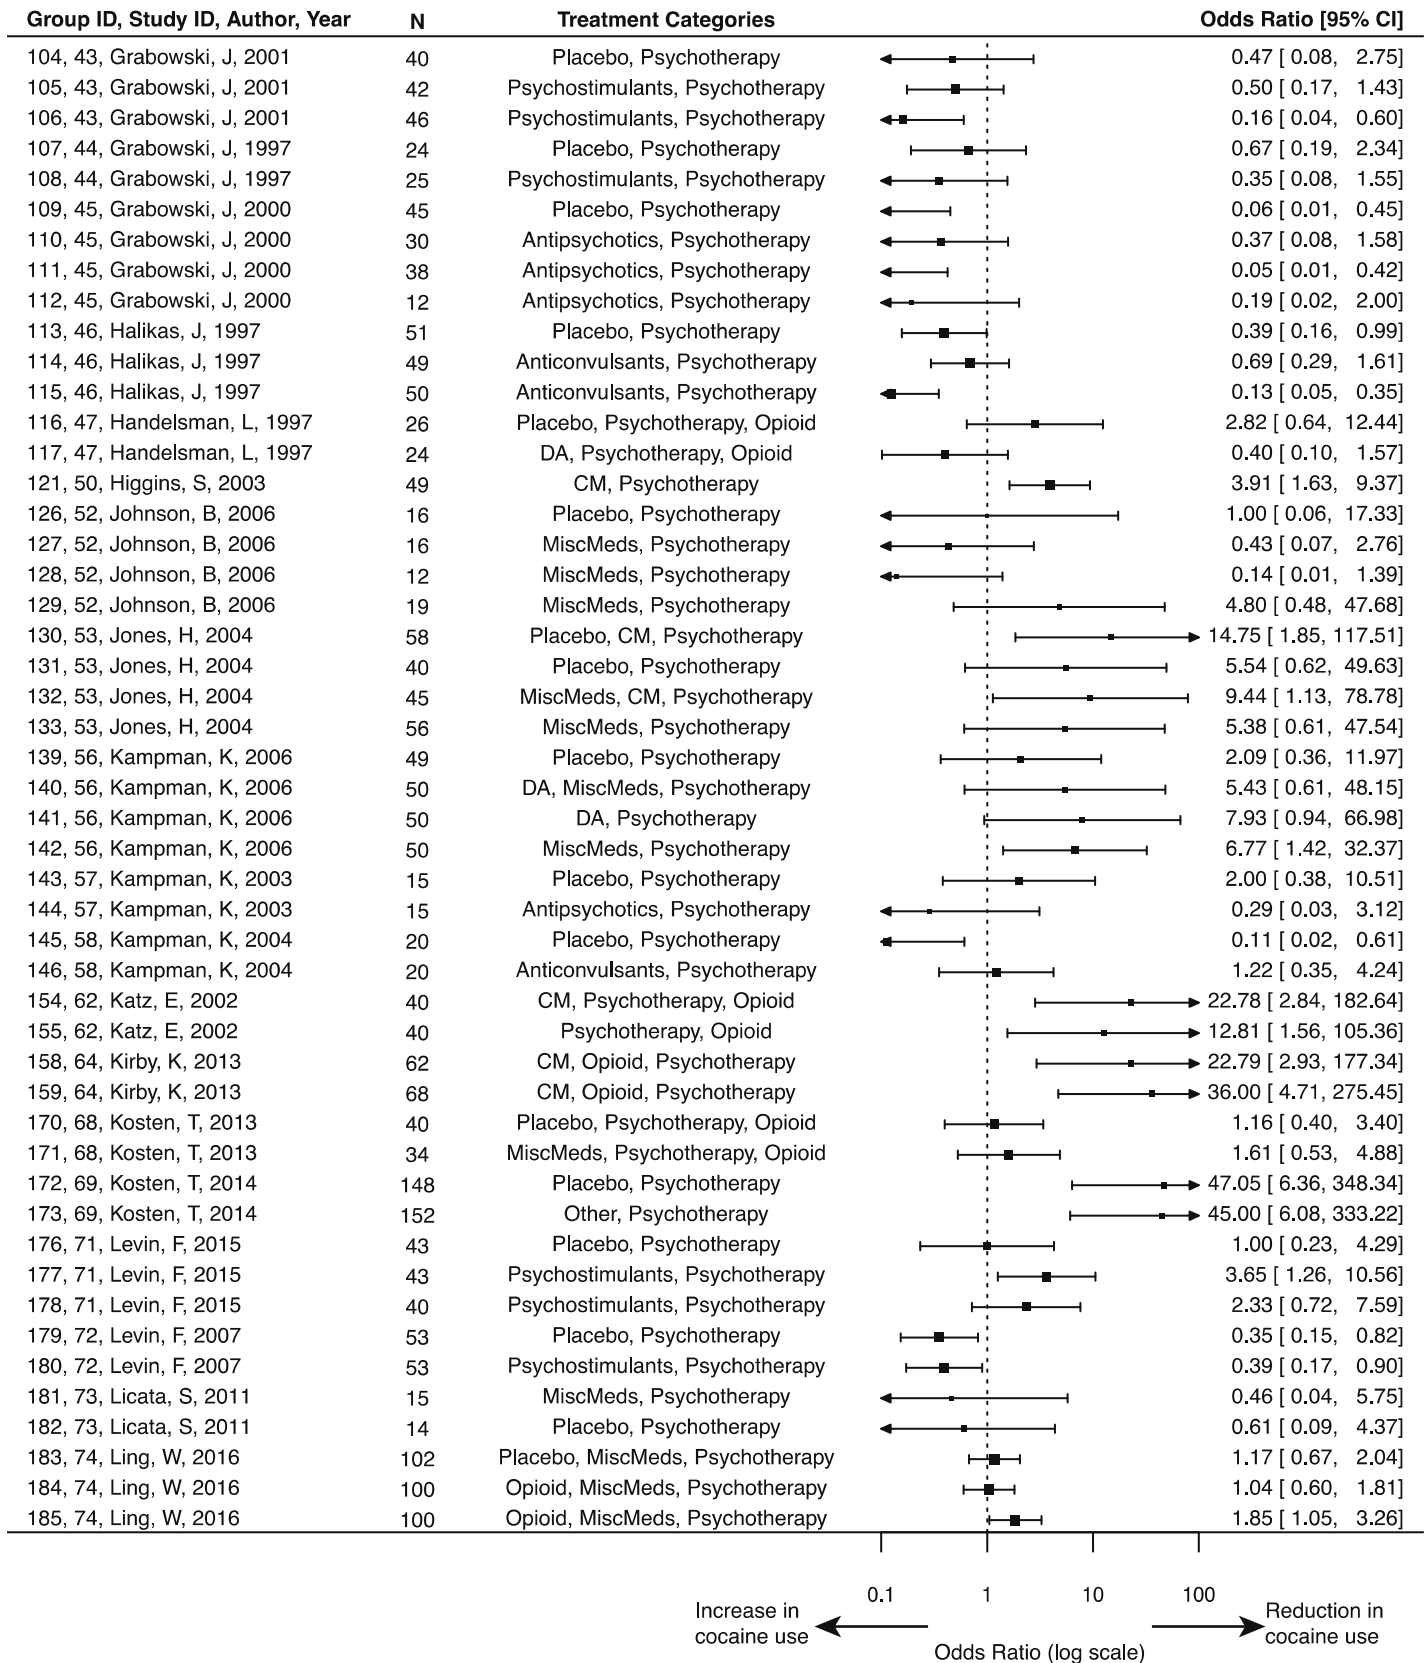

# Psychotherapy (3 of 6)

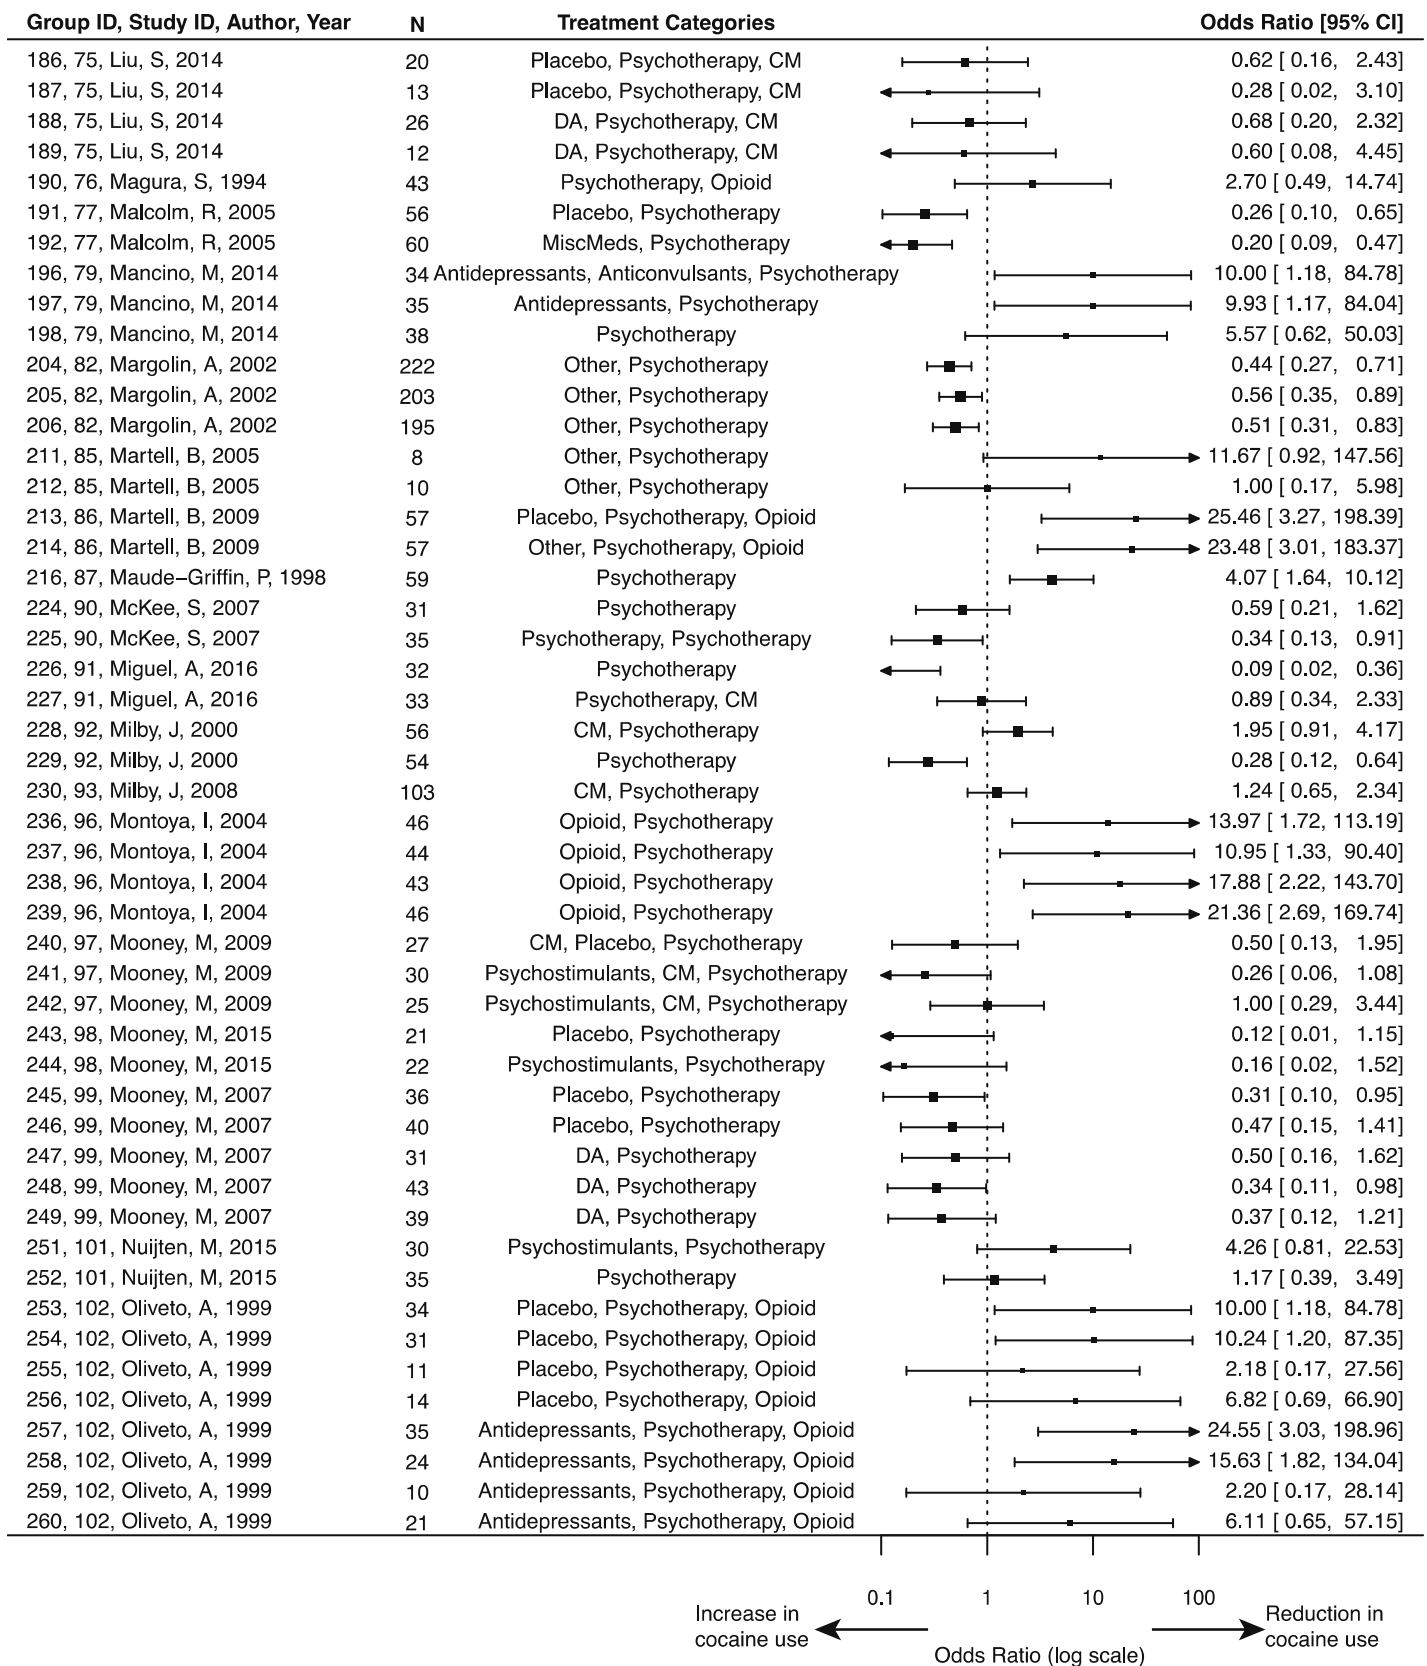

# Psychotherapy (4 of 6)

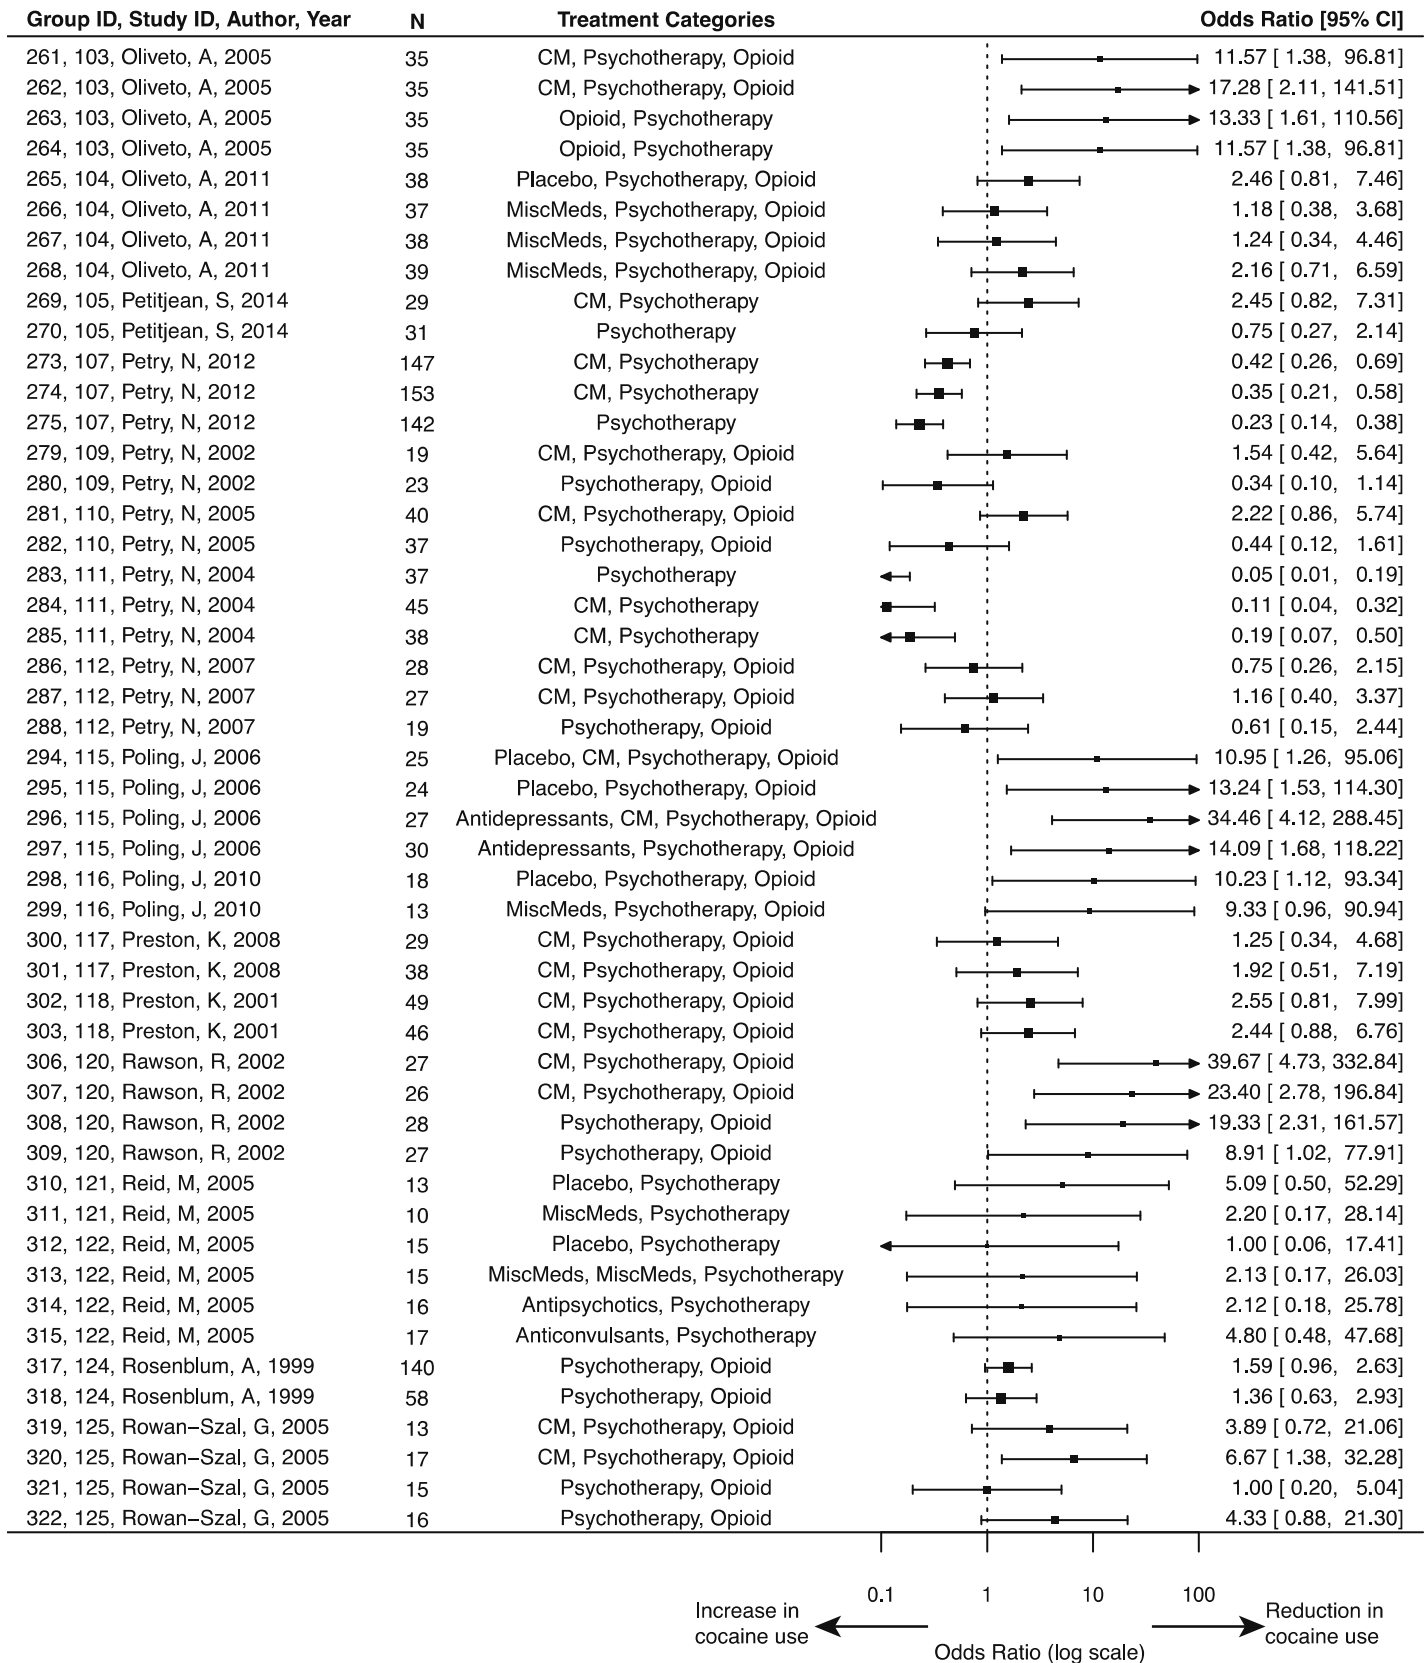

# Psychotherapy (5 of 6)

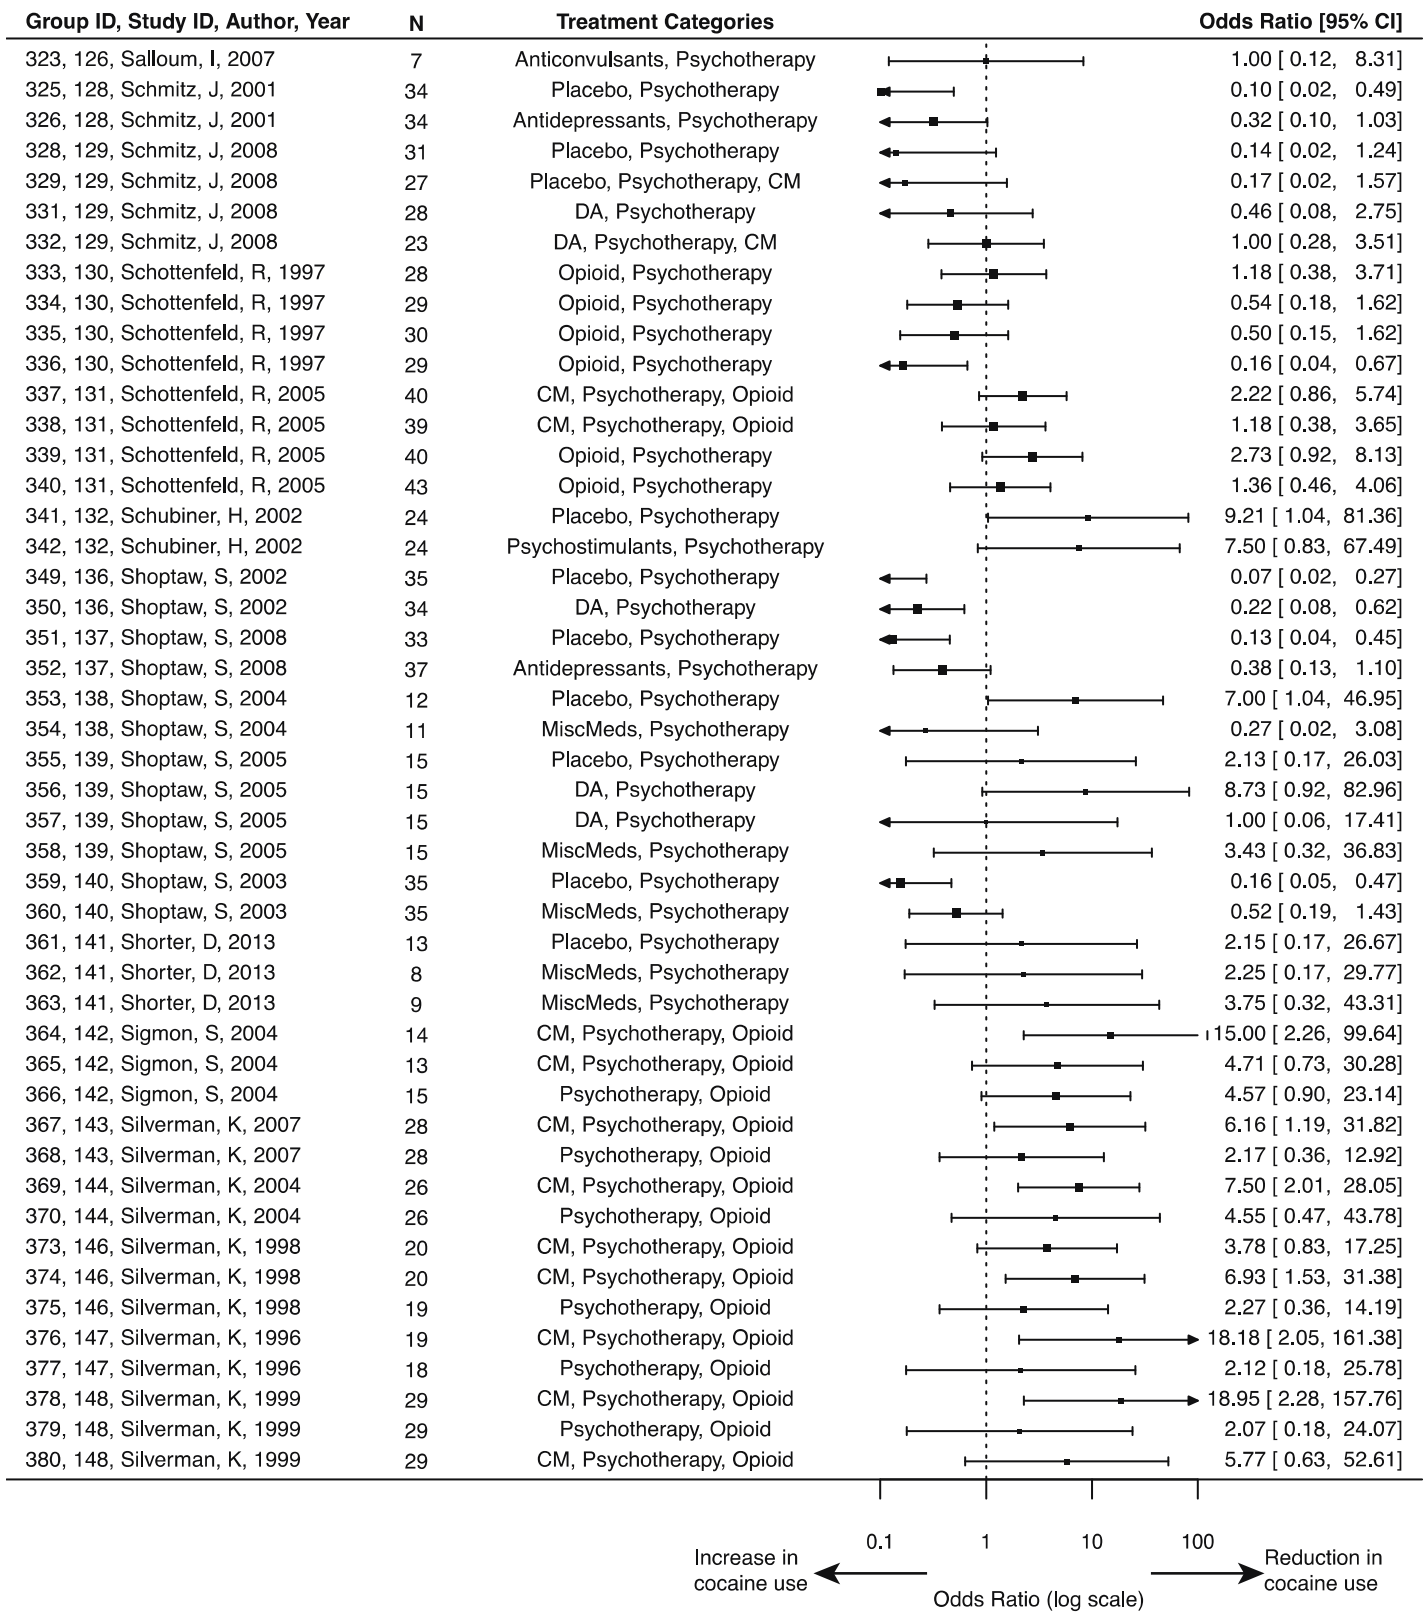

## Psychotherapy (6 of 6)

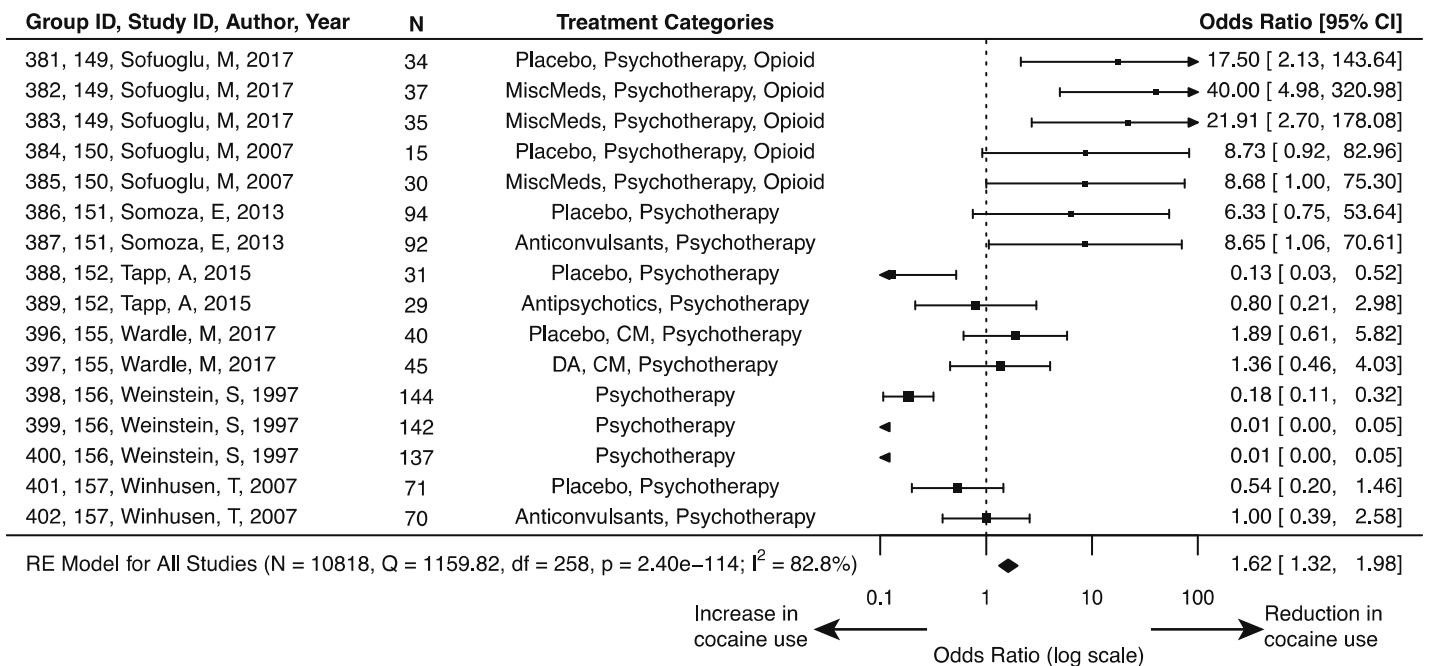

**eFigure 12.** Funnel Plots (Full Models)

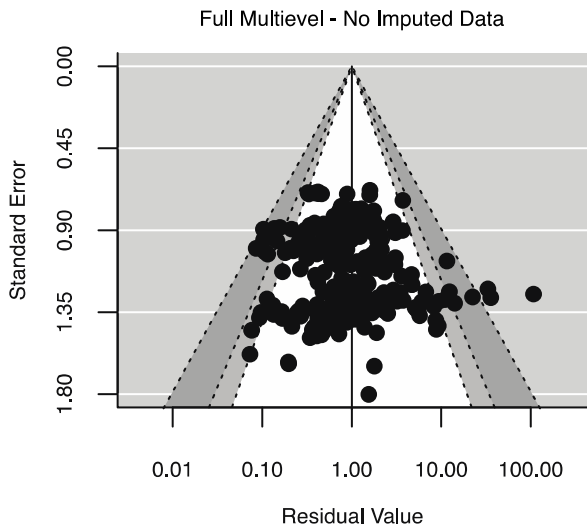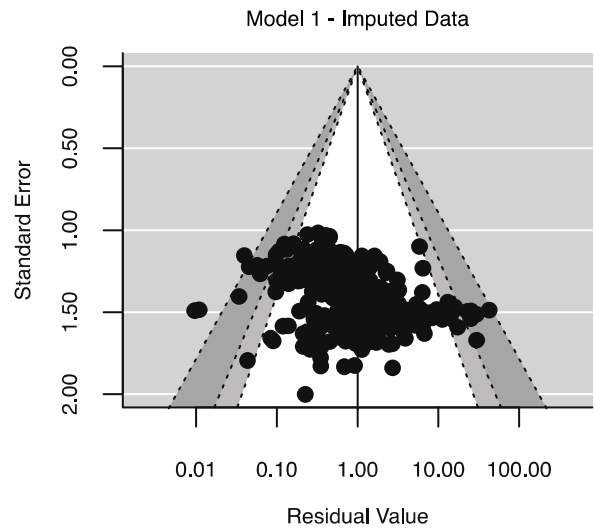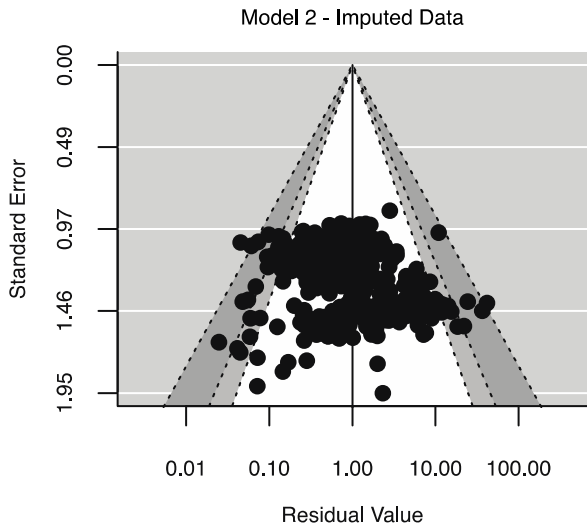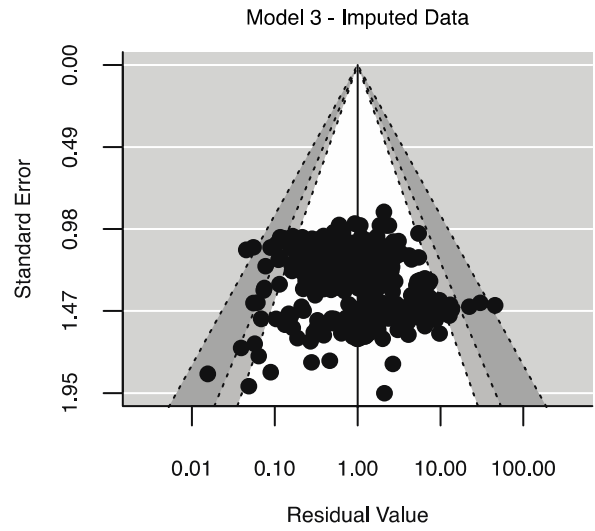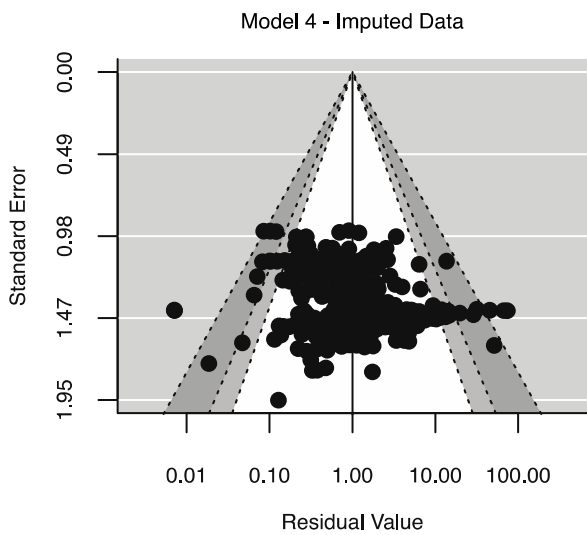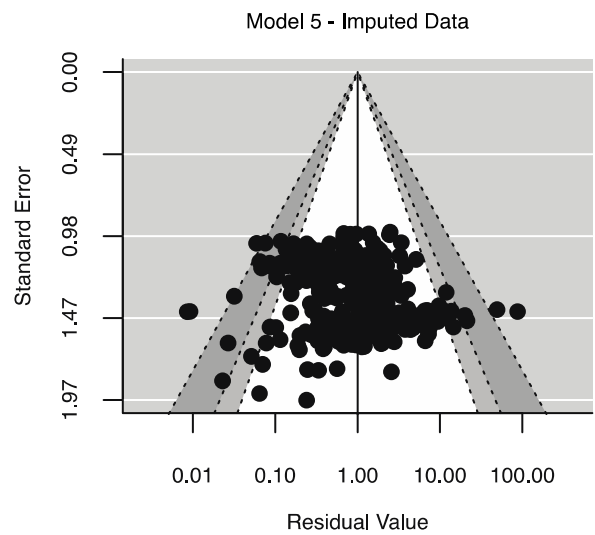



**eFigure 13.** Funnel Plots (By Treatment Category)

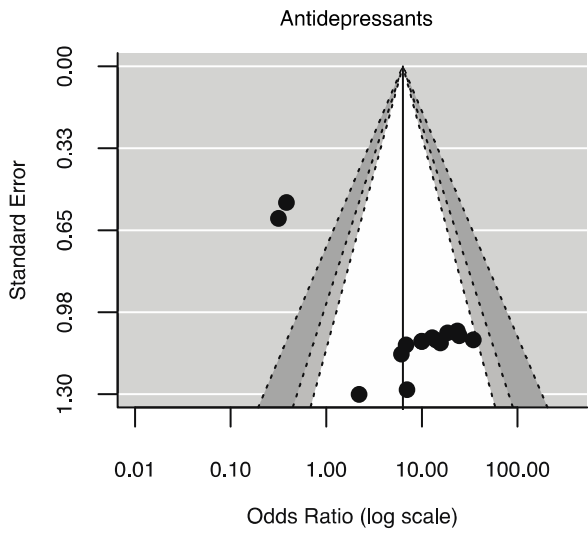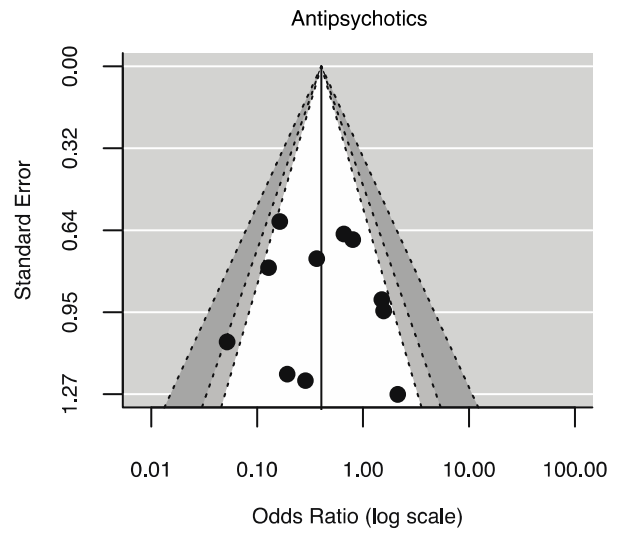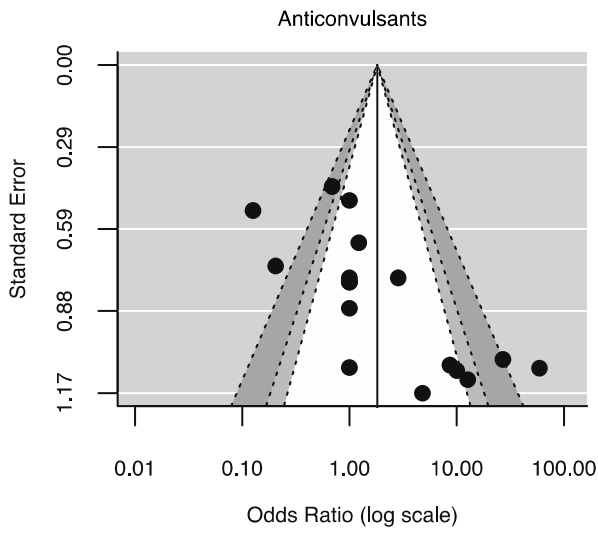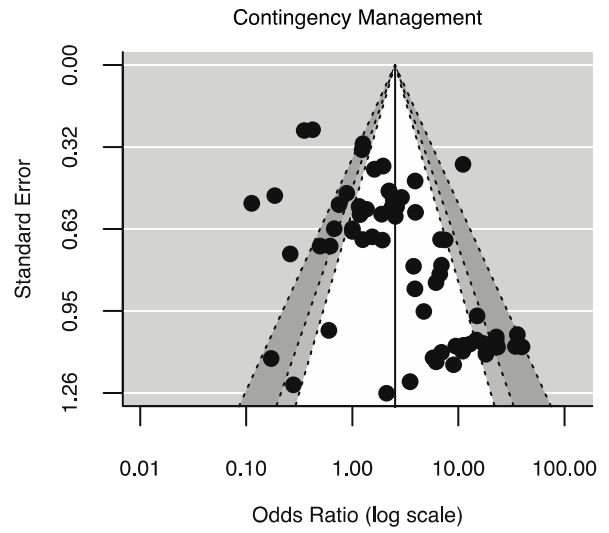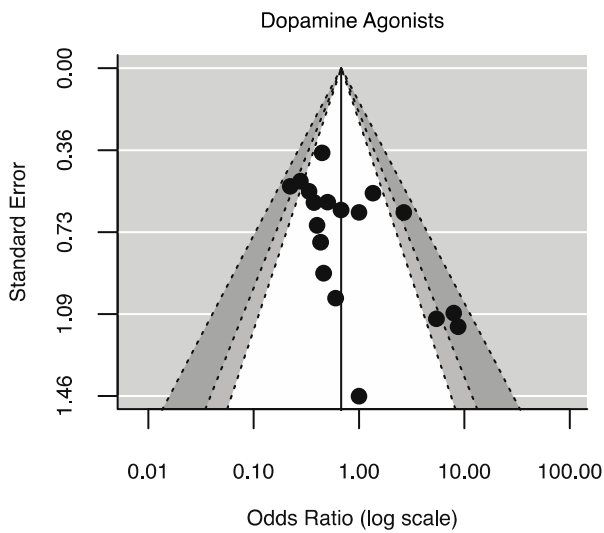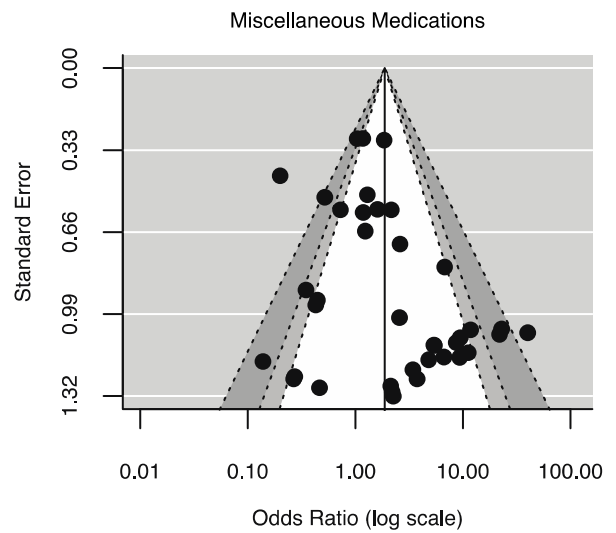

## Funnel Plots (By Treatment Category)

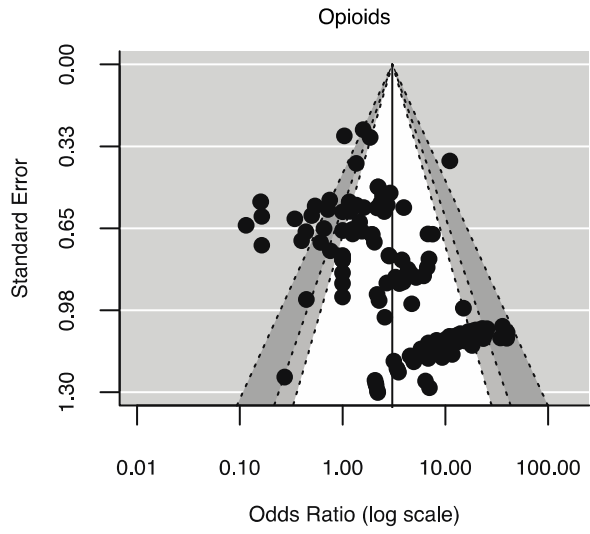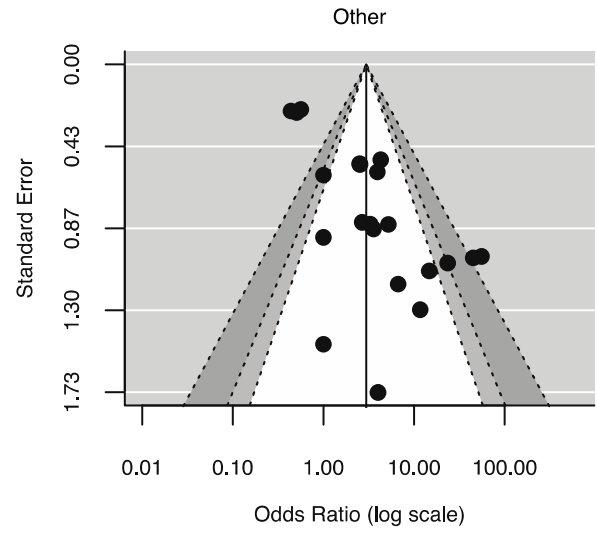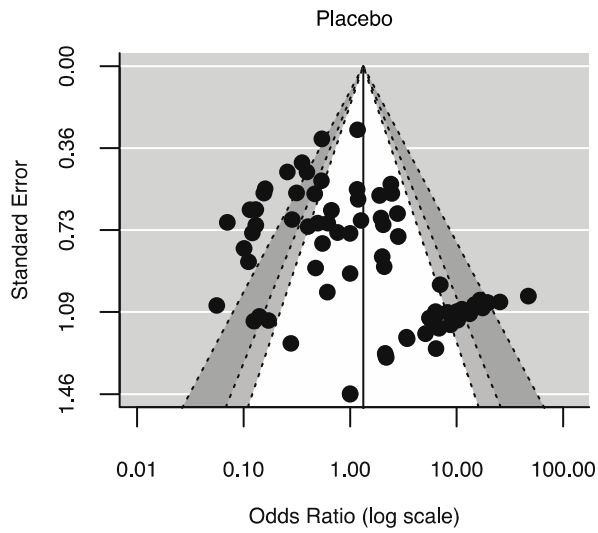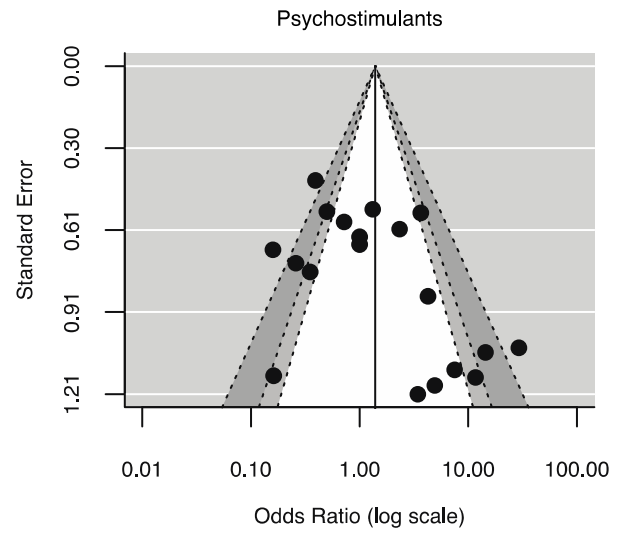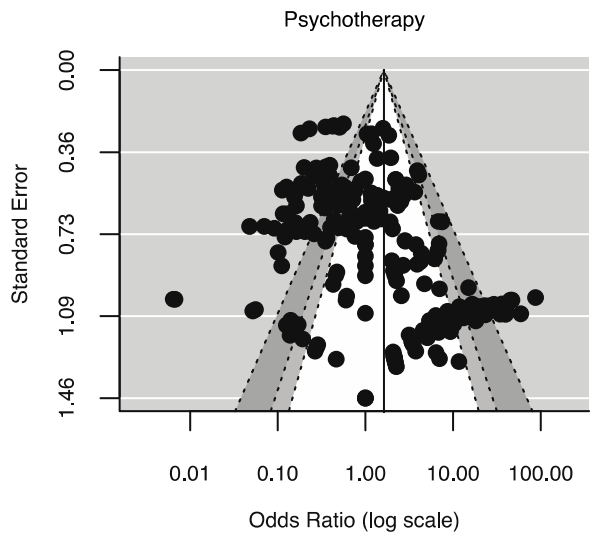

## eReferences

1. Rowan-Szal GA, Bartholomew NG, Chatham LR, Simpson DD. A combined cognitive and behavioral intervention for cocaine-using methadone clients. *J Psychoactive Drugs*. 2005;37(1):75-84.
2. Rawson RA, Huber A, McCann M, et al. A comparison of contingency management and cognitive-behavioral approaches during methadone maintenance treatment for cocaine dependence. *Arch Gen Psychiatry*. 2002;59(9):817-824.
3. Avants SK, Margolin A, DePhilippis D, Kosten TR. A comprehensive pharmacologic-psychosocial treatment program for HIV-seropositive cocaine- and opioid-dependent patients. preliminary findings. *J Subst Abuse Treat*. 1998;15(3):261-265.
4. Malcolm R, LaRowe S, Cochran K, et al. A controlled trial of amlodipine for cocaine dependence: a negative report. *J Subst Abuse Treat*. 2005;28(2):197-204.
5. Covi L, Hess JM, Schroeder JR, Preston KL. A dose response study of cognitive behavioral therapy in cocaine abusers. *J Subst Abuse Treat*. 2002;23(3):191-197.
6. Kampman KM, Dackis C, Lynch KG, et al. A double-blind, placebo-controlled trial of amantadine, propranolol, and their combination for the treatment of cocaine dependence in patients with severe cocaine withdrawal symptoms. *Drug Alcohol Depend*. 2006;85(2):129-137.
7. Dackis CA, Kampman KM, Lynch KG, Pettinati HM, O'Brien CP. A double-blind, placebo-controlled trial of modafinil for cocaine dependence. *Neuropsychopharmacology*. 2005;30(1):205-211.
8. Dackis CA, Kampman KM, Lynch KG, et al. A double-blind, placebo-controlled trial of modafinil for cocaine dependence. *J Subst Abuse Treat*. 2012;43(3):303-312.
9. Winhusen T, Somoza E, Ciraulo DA, et al. A double-blind, placebo-controlled trial of tiagabine for the treatment of cocaine dependence. *Drug Alcohol Depend*. 2007;91(2-3):141-148.
10. Somoza EC, Winship D, Gorodetzky CW, et al. A multisite, double-blind, placebo-controlled clinical trial to evaluate the safety and efficacy of vigabatrin for treating cocaine dependence. *JAMA Psychiatry*. 2013;70(6):630-637.
11. Kampman KM, Pettinati H, Lynch KG, Sparkman T, O'Brien CP. A pilot trial of olanzapine for the treatment of cocaine dependence. *Drug Alcohol Depend*. 2003;70(3):265-273.
12. Kampman KM, Pettinati H, Lynch KG, et al. A pilot trial of topiramate for the treatment of cocaine dependence. *Drug Alcohol Depend*. 2004;75(3):233-240.
13. Reid MS, Angrist B, Baker S, et al. A placebo-controlled screening trial of celecoxib for the treatment of cocaine dependence. *Addiction*. 2005;100(Suppl 1):32-42.
14. Reid MS, Casadonte P, Baker S, et al. A placebo-controlled screening trial of olanzapine, valproate, and coenzyme Q10/L-carnitine for the treatment of cocaine dependence. *Addiction*. 2005;100(Suppl 1):43-57.
15. Johnson BA, Roache JD, Ait-Daoud N, et al. A preliminary randomized, double-blind, placebo-controlled study of the safety and efficacy of ondansetron in the treatment of cocaine dependence. *Drug Alcohol Depend*. 2006;84(3):256-263.
16. Avants SK, Margolin A, Holford TR, Kosten TR. A randomized controlled trial of auricular acupuncture for cocaine dependence. *Arch Intern Med*. 2000;160(15):2305-2312.
17. Halikas JA, Crosby RD, Pearson VL, Graves NM. A randomized double-blind study of carbamazepine in the treatment of cocaine abuse. *Clin Pharmacol Ther*. 1997;62(1):89-105.
18. Petry NM, Barry D, Alessi SM, Rounsaville BJ, Carroll KM. A randomized trial adapting contingency management targets based on initial abstinence status of cocaine-dependent patients. *J Consult Clin Psychol*. 2012;80(2):276-285.
19. Silverman K, Wong CJ, Needham M, et al. A randomized trial of employment-based reinforcement of cocaine abstinence in injection drug users. *J Appl Behav Anal*. 2007;40(3):387-410.
20. Silverman K, Robles E, Mudric T, Bigelow GE, Stitzer ML. A randomized trial of long-term reinforcement of cocaine abstinence in methadone-maintained patients who inject drugs. *J Consult Clin Psychol*. 2004;72(5):839-854.
21. Petitjean SA, Dursteler-MacFarland KM, Krokarc MC, et al. A randomized, controlled trial of combined cognitive-behavioral therapy plus prize-based contingency management for cocaine dependence. *Drug Alcohol Depend*. 2014;145:94-100.
22. Dursteler-MacFarland KM, Farronato NS, Strasser J, et al. A randomized, controlled, pilot trial of methylphenidate and cognitive-behavioral group therapy for cocaine dependence in heroin prescription. *J Clin Psychopharmacol*. 2013;33(1):104-108.

23. Brown ES, Peterson Todd J, Hu LT, et al. A randomized, double-blind, placebo-controlled trial of citicoline for cocaine dependence in bipolar I disorder. *Am J Psychiatry*. 2015;172(10):1014-1021.
24. Shoptaw S, Kintaudi PC, Charuvastra C, Ling W. A screening trial of amantadine as a medication for cocaine dependence. *Drug Alcohol Depend*. 2002;66(3):217-224.
25. Margolin A, Kleber HD, Avants SK, et al. Acupuncture for the treatment of cocaine addiction: a randomized controlled trial. *JAMA*. 2002;287(1):55-63.
26. Malcolm R, Herron J, Sutherland SE, Brady KT. Adverse outcomes in a controlled trial of pergolide for cocaine dependence. *J Addict Dis*. 2001;20(1):81-92.
27. Grabowski J, Rhoades H, Stotts A, et al. Agonist-like or antagonist-like treatment for cocaine dependence with methadone for heroin dependence: two double-blind randomized clinical trials. *Neuropsychopharmacology*. 2004;29(5):969-981.
28. Wardle MC, Vincent JN, Suchting R, Green CE, Lane SD, Schmitz JM. Anhedonia is associated with poorer outcomes in contingency management for cocaine use disorder. *J Subst Abuse Treat*. 2017;72:32-39.
29. Beresford TP, Clapp L, Martin B, Wiberg JL, Alfors J, Beresford HF. Aripiprazole in schizophrenia with cocaine dependence: a pilot study. *J Clin Psychopharmacol*. 2005;25(4):363-366.
30. Walsh SL, Middleton LS, Wong CJ, et al. Atomoxetine does not alter cocaine use in cocaine dependent individuals: double blind randomized trial. *Drug Alcohol Depend*. 2013;130(1-3):150-157.
31. Donlin WD, Knealing TW, Needham M, Wong CJ, Silverman K. Attendance rates in a workplace predict subsequent outcome of employment-based reinforcement of cocaine abstinence in methadone patients. *J Appl Behav Anal*. 2008;41(4):499-516.
32. Monti PM, Rohsenow DJ, Michalec E, Martin RA, Abrams DB. Brief coping skills treatment for cocaine abuse: substance use outcomes at three months. *Addiction*. 1997;92(12):1717-1728.
33. Silverman K, Wong CJ, Umbricht-Schneiter A, Montoya ID, Schuster CR, Preston KL. Broad beneficial effects of cocaine abstinence reinforcement among methadone patients. *J Consult Clin Psychol*. 1998;66(5):811-824.
34. Handelsman L, Rosenblum A, Palij M, et al. Bromocriptine for cocaine dependence. a controlled clinical trial. *Am J Addict*. 1997;6(1):54-64.
35. Gorelick DA, Wilkins JN. Bromocriptine treatment for cocaine addiction: association with plasma prolactin levels. *Drug Alcohol Depend*. 2006;81(2):189-195.
36. Schottenfeld RS, Pakes JR, Oliveto A, Ziedonis D, Kosten TR. Buprenorphine vs methadone maintenance treatment for concurrent opioid dependence and cocaine abuse. *Arch Gen Psychiatry*. 1997;54(8):713-720.
37. Shoptaw S, Heinzerling KG, Rotheram-Fuller E, et al. Bupropion hydrochloride versus placebo, in combination with cognitive behavioral therapy, for the treatment of cocaine abuse/dependence. *J Addict Dis*. 2008;27(1):13-23.
38. Sofuoglu M, Poling J, Babuscio, et al. Carvedilol does not reduce cocaine use in methadone-maintained cocaine users. *J Subst Abuse Treat*. 2017;73:63-69.
39. Gonzalez G, Desai R, Sofuoglu M, et al. Clinical efficacy of gabapentin versus tiagabine for reducing cocaine use among cocaine dependent methadone-treated patients. *Drug Alcohol Depend*. 2007;87(1):1-9.
40. Mancino MJ, McGaugh J, Chopra MP, et al. Clinical efficacy of sertraline alone and augmented with gabapentin in recently abstinent cocaine-dependent patients with depressive symptoms. *J Clin Psychopharmacol*. 2014;34(2):234-239.
41. Sigmon SC, Correia CJ, Stitzer ML. Cocaine abstinence during methadone maintenance: effects of repeated brief exposure to voucher-based reinforcement. *Exp Clin Psychopharmacol*. 2004;12(4):269-275.
42. Sayers SL, Campbell EC, Kondrich J, et al. Cocaine abuse in schizophrenic patients treated with olanzapine versus haloperidol. *J Nerv Ment Dis*. 2005;193(6):379-386.
43. Martell BA, Orson FM, Poling J, et al. Cocaine vaccine for the treatment of cocaine dependence in methadone-maintained patients: a randomized, double-blind, placebo-controlled efficacy trial. *Arch Gen Psychiatry*. 2009;66(10):1116-1123.
44. Haney M, Gunderson EW, Jian H, Collins ED, Foltin RW. Cocaine-specific antibodies blunt the subjective effects of smoked cocaine in humans. *Biol Psychiatry*. 2010;67(1):59-65.
45. Epstein DH, Hawkins WE, Covi L, Umbricht A, Preston KL. Cognitive-behavioral therapy plus contingency management for cocaine use: findings during treatment and across 12-month follow-up. *Psychol Addict Behav*. 2003;17(1):73-82.
46. Higgins ST, Sigmon SC, Wong CJ, et al. Community reinforcement therapy for cocaine-dependent outpatients. *Arch Gen Psychiatry*. 2003;60(10):1043-1052.

47. Miguel AQC, Madruga CS, Cogo-Moreira H, et al. Contingency management is effective in promoting abstinence and retention in treatment among crack cocaine users in Brazil: a randomized controlled trial. *Psychol Addict Behav.* 2016;30(5):536-543.
48. Goncalves-Ferreira A, do Couto FS, Campos AR, Neto LPL, Goncalves-Ferreira D, Teixeira J. Deep brain stimulation for refractory cocaine dependence. *Biol Psychiatry.* 2016;79(11):e87-e89.
49. Kosten T, Oliveto A, Feingold A, et al. Desipramine and contingency management for cocaine and opiate dependence in buprenorphine maintained patients. *Drug Alcohol Depend.* 2003;70(3):315-325.
50. Oliveto AH, Feingold A, Schottenfeld R, Jatlow P, Kosten TR. Desipramine in opioid-dependent cocaine abusers maintained on buprenorphine vs methadone. *Arch Gen Psychiatry.* 1999;56(9):812-820.
51. Grabowski J, Rhoades H, Schmitz J, et al. Dextroamphetamine for cocaine-dependence treatment: a double-blind randomized clinical trial. *J Clin Psychopharmacol.* 2001;21(5):522-526.
52. George TP, Chawarski MC, Pakes J, Carroll KM, Kosten TR, Schottenfeld RS. Disulfiram versus placebo for cocaine dependence in buprenorphine-maintained subjects: a preliminary trial. *Biol Psychiatry.* 2000;47(12):1080-1086.
53. Salloum IM, Douaihy A, Cornelius JR, Kirisci L, Kelly TM, Hayes J. Divalproex utility in bipolar disorder with co-occurring cocaine dependence: a pilot study. *Addict Behav.* 2007;32(2):410-415.
54. Schubiner H, Saules KK, Arfken CL, et al. Double-blind placebo-controlled trial of methylphenidate in the treatment of adult ADHD patients with comorbid cocaine dependence. *Exp Clin Psychopharmacol.* 2002;10(3):286-294.
55. Elkashef A, Fudala PJ, Gorgon L, et al. Double-blind, placebo-controlled trial of selegiline transdermal system (STS) for the treatment of cocaine dependence. *Drug Alcohol Depend.* 2006;85(3):191-197.
56. Licata SC, Penetar DM, Ravichandran C, et al. Effects of daily treatment with citicoline: a double-blind, placebo-controlled study in cocaine-dependent volunteers. *J Addict Med.* 2011;5(1):57-64.
57. Mooney ME, Herin DV, Schmitz JM, Moukaddam N, Green CE, Grabowski J. Effects of oral methamphetamine on cocaine use: a randomized, double-blind, placebo-controlled trial. *Drug Alcohol Depend.* 2009;101(1-2):34-41.
58. Kablinger AS, Lindner MA, Casso S, et al. Effects of the combination of metyrapone and oxazepam on cocaine craving and cocaine taking: a double-blind, randomized, placebo-controlled pilot study. *J Psychopharmacol.* 2012;26(7):973-981.
59. Oliveto A, Poling J, Sevarino KA, et al. Efficacy of dose and contingency management procedures in LAAM-maintained cocaine-dependent patients. *Drug Alcohol Depend.* 2005;79(2):157-165.
60. Baldacara L, Cogo-Moreira H, Parreira BL, et al. Efficacy of topiramate in the treatment of crack cocaine dependence: a double-blind, randomized, placebo-controlled trial. *J Clin Psychiatry.* 2016;77(3):398-406.
61. Dunn KE, Fingerhood M, Wong CJ, Svikis DS, Nuzzo P, Silverman K. Employment-based abstinence reinforcement following inpatient detoxification in HIV-positive opioid and/or cocaine-dependent patients. *Exp Clin Psychopharmacol.* 2014;22(1):75-85.
62. Rosenblum A, Magura S, Palij M, Foote J, Handelsman L, Stimmel B. Enhanced treatment outcomes for cocaine-using methadone patients. *Drug Alcohol Depend.* 1999;54(3):207-218.
63. McKee SA, Carroll KM, Sinha R, et al. Enhancing brief cognitive-behavioral therapy with motivational enhancement techniques in cocaine users. *Drug Alcohol Depend.* 2007;91(1):97-101.
64. Levin FR, Mariani JJ, Specker S, et al. Extended-release mixed amphetamine salts vs placebo for comorbid adult attention-deficit/hyperactivity disorder and cocaine use disorder: a randomized clinical trial. *JAMA Psychiatry.* 2015;72(6):593-602.
65. Schmitz JM, Averill P, Stotts AL, Moeller FG, Rhoades HM, Grabowski J. Fluoxetine treatment of cocaine-dependent patients with major depressive disorder. *Drug Alcohol Depend.* 2001;63(3):207-214.
66. Myrick H, Henderson S, Brady KT, Malcolm R. Gabapentin in the treatment of cocaine dependence: a case series. *J Clin Psychiatry.* 2001;62(1):19-23.
67. Milby JB, Schumacher JE, McNamara C, et al. Initiating abstinence in cocaine abusing dually diagnosed homeless persons. *Drug Alcohol Depend.* 2000;60(1):55-67.
68. Kosten TR, Oliveto A, Sevarino KA, Gonsai K, Feingold A. Ketoconazole increases cocaine and opioid use in methadone maintained patients. *Drug Alcohol Depend.* 2002;66(2):173-180.
69. Schmitz JM, Mooney ME, Moeller FG, Stotts AL, Green C, Grabowski J. Levodopa pharmacotherapy for cocaine dependence: choosing the optimal behavioral therapy platform. *Drug Alcohol Depend.* 2008;94(1-3):142-150.
70. Petry NM, Martin B. Low-cost contingency management for treating cocaine- and opioid-abusing methadone patients. *J Consult Clin Psychol.* 2002;70(2):398-405.

71. Schottenfeld RS, Chawarski MC, Pakes JR, Pantalon MV, Carroll KM, Kosten TR. Methadone versus buprenorphine with contingency management or performance feedback for cocaine and opioid dependence. *Am J Psychiatry*. 2005;162(2):340-349.
72. Nuijten M, Blanken P, van den Brink W, Hendriks V. Modafinil in the treatment of crack-cocaine dependence in the Netherlands: results of an open-label randomised controlled feasibility trial. *J Psychopharmacol*. 2015;29(6):678-687.
73. Magura S, Rosenblum A, Lovejoy M, Handelsman L, Foote J, Stimmel B. Neurobehavioral treatment for cocaine-using methadone patients: a preliminary report. *J Addict Dis*. 1994;13(4):143-160.
74. Shoptaw S, Majewska MD, Wilkins J, Twitchell G, Yang X, Ling W. Participants receiving dehydroepiandrosterone during treatment for cocaine dependence show high rates of cocaine use in a placebo-controlled pilot study. *Exp Clin Psychopharmacol*. 2004;12(2):126-135.
75. Margolin A, Avants SK, Kosten TR. Pemoline for the treatment of cocaine dependence in methadone-maintained patients. *J Psychoactive Drugs*. 1996;28(3):301-304.
76. Kosten TR, Wu G, Huang W, et al. Pharmacogenetic randomized trial for cocaine abuse: disulfiram and dopamine  $\beta$ -hydroxylase. *Biol Psychiatry*. 2013;73(3):219-224.
77. Crosby RD, Pearson VL, Eller C, Winegarden T, Graves NL. Phenytoin in the treatment of cocaine abuse: a double-blind study. *Clin Pharmacol Ther*. 1996;59(4):458-468.
78. Shearer J, Wodak A, van Beek I, Mattick RP, Lewis J. Pilot randomized double blind placebo-controlled study of dexamphetamine for cocaine dependence. *Addiction*. 2003;98(8):1137-1141.
79. Mooney ME, Herin DV, Specker S, Babb D, Levin FR, Grabowski J. Pilot study of the effects of lisdexamfetamine on cocaine use: a randomized, double-blind, placebo-controlled trial. *Drug Alcohol Depend*. 2015;153:94-103.
80. Gilgun-Sherki Y, Eliaz RE, McCann DJ, et al. Placebo-controlled evaluation of a bioengineered, cocaine-metabolizing fusion protein, TV-1380 (AlbuBChE), in the treatment of cocaine dependence. *Drug Alcohol Depend*. 2016;166:13-20.
81. Petry NM, Martin B, Simcic F Jr. Prize reinforcement contingency management for cocaine dependence: integration with group therapy in a methadone clinic. *J Consult Clin Psychol*. 2005;73(2):354-359.
82. Petry NM, Tedford J, Austin M, Nich C, Carroll KM, Rounsaville BJ. Prize reinforcement contingency management for treating cocaine users: how low can we go, and with whom? *Addiction*. 2004;99(3):349-360.
83. Sofuoglu M, Poling J, Gonzalez G, Gonsai K, Oliveto A, Kosten TR. Progesterone effects on cocaine use in male cocaine users maintained on methadone: a randomized, double-blind, pilot study. *Exp Clin Psychopharmacol*. 2007;15(5):453-460.
84. Epstein DH, Schmittner J, Umbricht A, Schroeder JR, Moolchan ET, Preston KL. Promoting abstinence from cocaine and heroin with a methadone dose increase and a novel contingency. *Drug Alcohol Depend*. 2009;101(1-2):92-100.
85. Tapp A, Wood AE, Kennedy A, Sylvers P, Kilzieh N, Saxon AJ. Quetiapine for the treatment of cocaine use disorder. *Drug Alcohol Depend*. 2015;149:18-24.
86. Brown ES, Nejtck VA, Perantie DC, Bobadilla L. Quetiapine in bipolar disorder and cocaine dependence. *Bipolar Disord*. 2002;4(6):406-411.
87. Kirby KC, Carpenedo CM, Dugosh KL, et al. Randomized clinical trial examining duration of voucher-based reinforcement therapy for cocaine abstinence. *Drug Alcohol Depend*. 2013;132(3):639-645.
88. Weinstein SP, Gottheil E, Sterling RC. Randomized comparison of intensive outpatient vs. individual therapy for cocaine abusers. *J Addict Dis*. 1997;16(2):41-56.
89. Shoptaw S, Watson DW, Reiber C, et al. Randomized controlled pilot trial of cabergoline, hydergine and levodopa/carbidopa: Los Angeles Cocaine Rapid Efficacy Screening Trial (CREST). *Addiction*. 2005;100(Suppl 1):78-90.
90. Shoptaw S, Yang X, Rotheram-Fuller EJ, et al. Randomized placebo-controlled trial of baclofen for cocaine dependence: preliminary effects for individuals with chronic patterns of cocaine use. *J Clin Psychiatry*. 2003;64(12):1440-1448.
91. Preston KL, Ghitza UE, Schmittner JP, Schroeder JR, Epstein DH. Randomized trial comparing two treatment strategies using prize-based reinforcement of abstinence in cocaine and opiate users. *J Appl Behav Anal*. 2008;41(4):551-563.
92. Montoya ID, Gorelick DA, Preston KL, et al. Randomized trial of buprenorphine for treatment of concurrent opiate and cocaine dependence. *Clin Pharmacol Ther*. 2004;75(1):34-48.
93. Petry NM, Alessi SM, Hanson T, Sierra S. Randomized trial of contingent prizes versus vouchers in cocaine-using methadone patients. *J Consult Clin Psychol*. 2007;75(6):983-991.

94. Ghitza UE, Epstein DH, Schmittner J, Vahabzadeh M, Lin JL, Preston KL. Randomized trial of prize-based reinforcement density for simultaneous abstinence from cocaine and heroin. *J Consult Clin Psychol*. 2007;75(5):765-774.
95. Oliveto A, Poling J, Mancino MJ, et al. Randomized, double blind, placebo-controlled trial of disulfiram for the treatment of cocaine dependence in methadone-stabilized patients. *Drug Alcohol Depend*. 2011;113(2-3):184-191.
96. Brodie JD, Case BG, Figueroa E, et al. Randomized, double-blind, placebo-controlled trial of vigabatrin for the treatment of cocaine dependence in Mexican parolees. *Am J Psychiatry*. 2009;166(11):1269-1277.
97. Grabowski J, Roache JD, Schmitz JM, Rhoades H, Creson D, Korszun A. Replacement medication for cocaine dependence: methylphenidate. *J Clin Psychopharmacol*. 1997;17(6):485-488.
98. Plebani JG, Lynch KG, Yu Q, Pettinati HM, O'Brien CP, Kampman KM. Results of an initial clinical trial of varenicline for the treatment of cocaine dependence. *Drug Alcohol Depend*. 2012;121(1-2):163-166.
99. Grabowski J, Rhoades H, Silverman P, et al. Risperidone for the treatment of cocaine dependence: randomized, double-blind trial. *J Clin Psychopharmacol*. 2000;20(3):305-310.
100. Jones HE, Johnson RE, Bigelow GE, Silverman K, Mudric T, Strain EC. Safety and efficacy of L-tryptophan and behavioral incentives for treatment of cocaine dependence: a randomized clinical trial. *Am J Addict*. 2004;13(5):421-437.
101. Mooney ME, Schmitz JM, Moeller FG, Grabowski J. Safety, tolerability and efficacy of levodopa-carbidopa treatment for cocaine dependence: two double-blind, randomized, clinical trials. *Drug Alcohol Depend*. 2007;88(2-3):214-223.
102. Preston KL, Umbrecht A, Wong CJ, Epstein DH. Shaping cocaine abstinence by successive approximation. *J Consult Clin Psychol*. 2001;69(4):643-654.
103. Poling J, Oliveto A, Petry N, et al. Six-month trial of bupropion with contingency management for cocaine dependence in a methadone-maintained population. *Arch Gen Psychiatry*. 2006;63(2):219-228.
104. Maude-Griffin PM, Hohenstein JM, Humfleet GL, Reilly PM, Tusel DJ, Hall SM. Superior efficacy of cognitive-behavioral therapy for urban crack cocaine abusers: main and matching effects. *J Consult Clin Psychol*. 1998;66(5):832-837.
105. Silverman K, Higgins ST, Brooner RK, et al. Sustained cocaine abstinence in methadone maintenance patients through voucher-based reinforcement therapy. *Arch Gen Psychiatry*. 1996;53(5):409-415.
106. Shorter D, Lindsay JA, Kosten TR. The alpha-1 adrenergic antagonist doxazosin for treatment of cocaine dependence: a pilot study. *Drug Alcohol Depend*. 2013;131(1-2):66-70.
107. Katz EC, Robles-Sotelo E, Correia CJ, Silverman K, Stitzer ML, Bigelow G. The brief abstinence test: effects of continued incentive availability on cocaine abstinence. *Exp Clin Psychopharmacol*. 2002;10(1):10-17.
108. Liu S, Green CE, Lane SD, et al. The influence of dopamine  $\beta$ -hydroxylase gene polymorphism rs1611115 on levodopa/carbidopa treatment for cocaine dependence: a preliminary study. *Pharmacogenet Genomics*. 2014;24(7):370-373.
109. Poling J, Rounsaville B, Gonsai K, Severino K, Sofuoglu M. The safety and efficacy of varenicline in cocaine using smokers maintained on methadone: a pilot study. *Am J Addict*. 2010;19(5):401-408.
110. Holtyn AF, Koffarnus MN, DeFulio A, et al. The therapeutic workplace to promote treatment engagement and drug abstinence in out-of-treatment injection drug users: a randomized controlled trial. *Prev Med*. 2014;68:62-70.
111. Gonzalez G, Sevarino K, Sofuoglu M, et al. Tiagabine increases cocaine-free urines in cocaine-dependent methadone-treated patients: results of a randomized pilot study. *Addiction*. 2003;98(11):1625-1632.
112. Milby JB, Schumacher JE, Vuchinich RE, Freedman MJ, Kertesz S, Wallace D. Toward cost-effective initial care for substance-abusing homeless. *J Subst Abuse Treat*. 2008;34(2):180-191.
113. Brodie JD, Figueroa E, Dewey SL. Treating cocaine addiction: from preclinical to clinical trial experience with gamma-vinyl GABA. *Synapse*. 2003;50(3):261-265.
114. Levin FR, Evans SM, Brooks DJ, Garawi F. Treatment of cocaine dependent treatment seekers with adult ADHD: double-blind comparison of methylphenidate and placebo. *Drug Alcohol Depend*. 2007;87(1):20-29.
115. Focchi GRA, Leite MC, Andrade AG, Scivoletto S. Use of dopamine agonist pergolide in outpatient treatment of cocaine dependence. *Subst Use Misuse*. 2005;40(8):1169-1177.
116. Feingold A, Oliveto A, Schottenfeld R, Kosten TR. Utility of crossover designs in clinical trials: efficacy of desipramine vs. placebo in opioid-dependent cocaine abusers. *Am J Addict*. 2002;11(2):111-123.
117. Kosten TR, Domingo CB, Shorter D, et al. Vaccine for cocaine dependence: a randomized double-blind placebo-controlled efficacy trial. *Drug Alcohol Depend*. 2014;140:42-47.
118. Martell BA, Mitchell E, Poling J, Gonsai K, Kosten TR. Vaccine pharmacotherapy for the treatment of cocaine dependence. *Biol Psychiatry*. 2005;58(2):158-164.

119. Silverman K, Chutuape MA, Bigelow GE, Stitzer ML. Voucher-based reinforcement of cocaine abstinence in treatment-resistant methadone patients: effects of reinforcement magnitude. *Psychopharmacology (Berl)*. 1999;146(2):128-138.
120. Dallery J, Silverman K, Chutuape MA, Bigelow GE, Stitzer ML. Voucher-based reinforcement of opiate plus cocaine abstinence in treatment-resistant methadone patients: effects of reinforcer magnitude. *Exp Clin Psychopharmacol*. 2001;9(3):317-325.
